# Supplementary material for: Constitutive Activation of p62/Sequestosome-1-Mediated Proteaphagy Regulates Proteolysis and Impairs Cell Death in Bortezomib-Resistant Mantle Cell Lymphoma
Source: Cancers (Basel). 2022 Feb 12;14(4):923. doi: 10.3390/cancers14040923 (PMC8869867; doi:10.3390/cancers14040923)
Supplement: Supplementary file 1 [file cancers-14-00923-s001.zip › Quinet et al Supplementary Table S1.xlsx]

## Sheet: All proteins(Spect.counts-GST)
R4_Z138	R4_ZBR	R5_Z138	R5_ZBR	R8_Z138	R8_ZBR	P	Pcorrect	# rep Z138	# rep ZBR	M.Z138vsZBR	Sum	E	FDR	pro
0	0	0	0	0	0	NaN	NaN	0	0	0	0	3	0	>sp|A0A075B759|PAL4E_HUMAN Peptidyl-prolyl cis-trans isomerase A-like 4E OS=Homo sapiens GN=PPIAL4E PE=3 SV=1
0	0	0	0	0	0	NaN	NaN	0	0	0	0	3	0	>sp|A0A0B4J2A2|PAL4C_HUMAN Peptidyl-prolyl cis-trans isomerase A-like 4C OS=Homo sapiens GN=PPIAL4C PE=2 SV=1
0	0	0	0	0	0	NaN	NaN	0	0	0	0	2	0	>sp|A0AVF1|IFT56_HUMAN Intraflagellar transport protein 56 OS=Homo sapiens GN=TTC26 PE=2 SV=1
3.01495	2.51307	0	0	2.32193	1.27302	0.680225	0.910508	2	2	0.51693	17.2083	2	0	>sp|A0FGR8|ESYT2_HUMAN Extended synaptotagmin-2 OS=Homo sapiens GN=ESYT2 PE=1 SV=1
0	0	0	0	0	0	NaN	NaN	0	0	0	0	2	0.00326531	>sp|A0JP26|POTB3_HUMAN POTE ankyrin domain family member B3 OS=Homo sapiens GN=POTEB3 PE=2 SV=2
0	1.77259	0	0.736966	0	0	0.179046	0.686745	0	2	-0.836518	3.08333	2	0	>sp|A0M8Q6|LAC7_HUMAN Ig lambda-7 chain C region OS=Homo sapiens GN=IGLC7 PE=4 SV=2
0.874469	0.736966	0	1.77259	0.415037	2.56478	0.0978122	0.686745	2	3	-1.26161	9.16667	2	0	>sp|A1L0T0|ILVBL_HUMAN Acetolactate synthase-like protein OS=Homo sapiens GN=ILVBL PE=1 SV=2
1.32193	2.08746	1.11548	0	2.73697	1.77259	0.623807	0.878706	3	2	0.438106	14	2	0	>sp|A2A3N6|PIPSL_HUMAN Putative PIP5K1A and PSMD4-like protein OS=Homo sapiens GN=PIPSL PE=5 SV=1
0	0	0	1.27302	1.05889	0	0.903351	0.972756	1	1	-0.0713749	2.5	2	0.00175285	>sp|A2RTX5|SYTC2_HUMAN Probable threonine--tRNA ligase 2, cytoplasmic OS=Homo sapiens GN=TARSL2 PE=1 SV=1
0	0	0	0	3.37504	4.32793	0.870596	0.969525	1	1	-0.317629	28.4583	1	0	>sp|A3KMH1|VWA8_HUMAN von Willebrand factor A domain-containing protein 8 OS=Homo sapiens GN=VWA8 PE=1 SV=2
1.77259	1.77259	0.5025	0.736966	0	0	0.920605	0.972756	2	2	-0.0781551	5.91667	1	0	>sp|A4D1U4|LCHN_HUMAN Protein LCHN OS=Homo sapiens GN=LCHN PE=2 SV=1
0.321928	0	0.5025	0.736966	0.415037	0.662965	0.834576	0.961096	3	2	-0.0534882	2.25	3	0	>sp|A4D2B8|PM2P1_HUMAN Putative postmeiotic segregation increased 2-like protein 1 OS=Homo sapiens GN=PMS2P1 PE=5 SV=1
2.34577	0	0	0	0	0	0.373901	0.686745	1	0	0.781925	4.08333	4	0	>sp|A4D2H0|CTGEF_HUMAN cTAGE family member 15 OS=Homo sapiens GN=CTAGE15 PE=2 SV=1
2.34577	0	0	1.77259	0	0	0.854935	0.964759	1	1	0.191062	6.5	1	0	>sp|A4FU28|CTGE9_HUMAN cTAGE family member 9 OS=Homo sapiens GN=CTAGE9 PE=2 SV=2
0	3.27922	0	1	0	1.43741	0.0525169	0.686745	0	3	-1.90554	11.4167	1	0	>sp|A5A3E0|POTEF_HUMAN POTE ankyrin domain family member F OS=Homo sapiens GN=POTEF PE=1 SV=2
5.43741	4.8413	2.74595	4.84967	4.44846	1.9386	0.80212	0.946645	3	3	0.334084	127.208	1	0	>sp|A5YKK6|CNOT1_HUMAN CCR4-NOT transcription complex subunit 1 OS=Homo sapiens GN=CNOT1 PE=1 SV=2
0	1.27302	0	0	1.62449	0	0.873042	0.969525	1	1	0.117157	3.5	1	0.00165837	>sp|A6NC78|GOG8I_HUMAN Putative golgin subfamily A member 8I OS=Homo sapiens GN=GOLGA8IP PE=5 SV=2
0	1.27302	0	0	1.05889	0	0.903351	0.972756	1	1	-0.0713749	2.5	3	0.0029347	>sp|A6NCC3|GOG8O_HUMAN Golgin subfamily A member 8O OS=Homo sapiens GN=GOLGA8O PE=1 SV=3
0	0.584963	0	0	2.32193	0	0.508369	0.821805	1	1	0.578989	4.5	1	0	>sp|A6NDG6|PGP_HUMAN Phosphoglycolate phosphatase OS=Homo sapiens GN=PGP PE=1 SV=1
0.321928	0	0	0.736966	1.05889	1.27302	0.687219	0.915247	2	2	-0.209721	3.41667	2	0	>sp|A6NDU8|CE051_HUMAN UPF0600 protein C5orf51 OS=Homo sapiens GN=C5orf51 PE=1 SV=1
0	0	0	0	0	0	NaN	NaN	0	0	0	0	4	0	>sp|A6NEC2|PSAL_HUMAN Puromycin-sensitive aminopeptidase-like protein OS=Homo sapiens GN=NPEPPSL1 PE=2 SV=3
0	1.77259	1.11548	0	0.415037	0	0.910555	0.972756	2	1	-0.0806916	3.91667	1	0	>sp|A6NED2|RCCD1_HUMAN RCC1 domain-containing protein 1 OS=Homo sapiens GN=RCCD1 PE=1 SV=1
0	0	0	1.27302	1.05889	0	0.903351	0.972756	1	1	-0.0713749	2.5	3	0.00287356	>sp|A6NFN3|RFOX3_HUMAN RNA binding protein fox-1 homolog 3 OS=Homo sapiens GN=RBFOX3 PE=2 SV=4
0	0	0	0	0	1.87447	0.373901	0.686745	0	1	-0.624823	2.66667	1	0	>sp|A6NHL2|TBAL3_HUMAN Tubulin alpha chain-like 3 OS=Homo sapiens GN=TUBAL3 PE=1 SV=2
0	0	0	0	0	0	NaN	NaN	0	0	0	0	4	0	>sp|A6NHQ2|FBLL1_HUMAN rRNA/tRNA 2'-O-methyltransferase fibrillarin-like protein 1 OS=Homo sapiens GN=FBLL1 PE=3 SV=2
1.77259	2.34577	2.36923	0	0	0	0.601445	0.874881	2	1	0.598683	10.6667	1	0.0020141	>sp|A6NHR9|SMHD1_HUMAN Structural maintenance of chromosomes flexible hinge domain-containing protein 1 OS=Homo sapiens GN=SMCHD1 PE=1 SV=2
0	0	0	0	1.62449	0	0.373901	0.686745	1	0	0.541497	2.08333	1	0	>sp|A6NHZ5|LR14B_HUMAN Leucine-rich repeat-containing protein 14B OS=Homo sapiens GN=LRRC14B PE=3 SV=3
0.874469	0	0	0	0	0	0.373901	0.686745	1	0	0.29149	0.833333	2	0.00558659	>sp|A6NI47|POTEM_HUMAN Putative POTE ankyrin domain family member M OS=Homo sapiens GN=POTEM PE=3 SV=2
2.02975	2.58496	0	0	0	0	0.874049	0.96954	1	1	-0.185072	8.08333	3	0	>sp|A6NIE6|RN3P2_HUMAN Putative RRN3-like protein RRN3P2 OS=Homo sapiens GN=RRN3P2 PE=5 SV=3
0	0	0	0	1.62449	0	0.373901	0.686745	1	0	0.541497	2.08333	3	0	>sp|A6NIZ1|RP1BL_HUMAN Ras-related protein Rap-1b-like protein OS=Homo sapiens PE=2 SV=1
0	0	1.11548	0	0	0	0.373901	0.686745	1	0	0.371826	1.16667	1	0.00137836	>sp|A6NJ78|MET15_HUMAN Probable methyltransferase-like protein 15 OS=Homo sapiens GN=METTL15 PE=1 SV=1
0	0	0.5025	1.27302	0	0	0.603498	0.874881	1	1	-0.256839	1.83333	1	0	>sp|A6NKD9|CC85C_HUMAN Coiled-coil domain-containing protein 85C OS=Homo sapiens GN=CCDC85C PE=1 SV=1
0	0.736966	1.73697	1.77259	1.05889	0	0.90108	0.972756	2	2	0.0954347	6.5	3	0	>sp|A6NKF2|ARI3C_HUMAN AT-rich interactive domain-containing protein 3C OS=Homo sapiens GN=ARID3C PE=3 SV=1
3.78136	3.42626	2.70044	2.54432	2.73697	0.807355	0.391173	0.706669	3	3	0.813608	39.25	2	0	>sp|A6NKT7|RGPD3_HUMAN RanBP2-like and GRIP domain-containing protein 3 OS=Homo sapiens GN=RGPD3 PE=3 SV=2
0.321928	0.736966	0	0	0	0	0.633015	0.878706	1	1	-0.138346	0.916667	2	0.00410397	>sp|A6NL82|F183A_HUMAN Protein FAM183A OS=Homo sapiens GN=FAM183A PE=3 SV=2
0.321928	0	1.11548	0	0	0	0.221838	0.686745	2	0	0.479135	1.41667	3	0	>sp|A6NM15|CBWD7_HUMAN Putative COBW domain-containing protein 7 OS=Homo sapiens GN=CBWD7 PE=5 SV=3
0	1.27302	0	0	1.05889	0	0.903351	0.972756	1	1	-0.0713749	2.5	3	0.00292612	>sp|A6NMD2|GOG8J_HUMAN Golgin subfamily A member 8J OS=Homo sapiens GN=GOLGA8J PE=3 SV=3
0	0	0	0	0	1.39232	0.373901	0.686745	0	1	-0.464106	1.625	1	0	>sp|A6NMY6|AXA2L_HUMAN Putative annexin A2-like protein OS=Homo sapiens GN=ANXA2P2 PE=5 SV=2
0	0	0	0	0	2.60486	0.373901	0.686745	0	1	-0.868287	5.08333	1	0	>sp|A6NNZ2|TBB8L_HUMAN Tubulin beta-8 chain-like protein LOC260334 OS=Homo sapiens PE=1 SV=1
0	0	0	0	1.05889	0	0.373901	0.686745	1	0	0.352965	1.08333	2	0	>sp|A6ZKI3|F127A_HUMAN Protein FAM127A OS=Homo sapiens GN=FAM127A PE=1 SV=1
0.874469	0	0	0	0	0	0.373901	0.686745	1	0	0.29149	0.833333	1	0.00177936	>sp|A7E2S9|A30BL_HUMAN Putative ankyrin repeat domain-containing protein 30B-like OS=Homo sapiens GN=ANKRD30BL PE=2 SV=3
1.9386	1.73697	0	2.34577	0	2.02975	0.106318	0.686745	1	3	-1.3913	12.3333	2	0	>sp|A8K0Z3|WASH1_HUMAN WAS protein family homolog 1 OS=Homo sapiens GN=WASH1 PE=1 SV=2
2.48113	2.58496	2.36923	2.73697	3.93074	3.24793	0.902796	0.972756	3	3	0.0704141	42.1667	1	0	>sp|A8MPP1|D11L8_HUMAN Putative ATP-dependent RNA helicase DDX11-like protein 8 OS=Homo sapiens GN=DDX11L8 PE=1 SV=1
0	0	1.73697	0	0	0	0.373901	0.686745	1	0	0.578989	2.33333	1	0	>sp|A8MPS7|YDJC_HUMAN Carbohydrate deacetylase OS=Homo sapiens GN=YDJC PE=1 SV=1
1	0	0	0	0	0.5025	0.679651	0.910508	1	1	0.165833	1.41667	1	0	>sp|A8MTJ3|GNAT3_HUMAN Guanine nucleotide-binding protein G(t) subunit alpha-3 OS=Homo sapiens GN=GNAT3 PE=2 SV=2
0	0	0	0	0	0	NaN	NaN	0	0	0	0	1	0.00793021	>sp|A8MWD9|RUXGL_HUMAN Putative small nuclear ribonucleoprotein G-like protein 15 OS=Homo sapiens GN=SNRPGP15 PE=5 SV=2
0	0.736966	0	1.27302	0	0	0.143601	0.686745	0	2	-0.669995	2.08333	2	0	>sp|A8MWL7|TM14D_HUMAN Transmembrane protein 14D OS=Homo sapiens GN=TMEM14D PE=3 SV=2
1.11548	1.27302	0.5025	1.27302	0	1.77259	0.0682097	0.686745	2	3	-0.900216	6.83333	2	0	>sp|A8MWX3|WASH4_HUMAN Putative WAS protein family homolog 4 OS=Homo sapiens GN=WASH4P PE=5 SV=1
0	0	0	0	0	0	NaN	NaN	0	0	0	0	1	0.0022779	>sp|A8MYB1|TMC5B_HUMAN Transmembrane and coiled-coil domain-containing protein 5B OS=Homo sapiens GN=TMCO5B PE=3 SV=1
0	0	0	0	0	0	NaN	NaN	0	0	0	0	2	0	>sp|B2RPK0|HGB1A_HUMAN Putative high mobility group protein B1-like 1 OS=Homo sapiens GN=HMGB1P1 PE=5 SV=1
0	1.77259	0	0	0	0	0.373901	0.686745	0	1	-0.590863	2.41667	3	0.00744602	>sp|B2RU33|POTEC_HUMAN POTE ankyrin domain family member C OS=Homo sapiens GN=POTEC PE=2 SV=2
0	0	0	0	2.52356	0	0.373901	0.686745	1	0	0.841187	4.75	2	0	>sp|B2RXH8|HNRC2_HUMAN Heterogeneous nuclear ribonucleoprotein C-like 2 OS=Homo sapiens GN=HNRNPCL2 PE=2 SV=1
2.45943	3.80735	2.52356	2.29768	2.52356	1.66297	0.897684	0.972756	3	3	-0.0871483	33.0833	2	0	>sp|B5ME19|EIFCL_HUMAN Eukaryotic translation initiation factor 3 subunit C-like protein OS=Homo sapiens GN=EIF3CL PE=3 SV=1
0	0	0	0	0	0	NaN	NaN	0	0	0	0	2	0.00497512	>sp|B7ZAP0|RBG10_HUMAN Rab GTPase-activating protein 1-like, isoform 10 OS=Homo sapiens GN=RABGAP1L PE=1 SV=1
1.77259	1.73697	1.73697	0	0	0	0.512535	0.823893	2	1	0.590863	7.08333	2	0	>sp|B7ZAQ6|GPHRA_HUMAN Golgi pH regulator A OS=Homo sapiens GN=GPR89A PE=1 SV=2
0	0	0	0	2.52356	0	0.373901	0.686745	1	0	0.841187	4.75	3	0	>sp|B7ZW38|HNRC3_HUMAN Heterogeneous nuclear ribonucleoprotein C-like 3 OS=Homo sapiens GN=HNRNPCL3 PE=2 SV=1
0.874469	0	0	0.736966	0	0	0.910092	0.972756	1	1	0.0458345	1.5	2	0	>sp|B9A064|IGLL5_HUMAN Immunoglobulin lambda-like polypeptide 5 OS=Homo sapiens GN=IGLL5 PE=2 SV=2
2.1964	2.08746	0	2.73697	0	2.34577	0.0934005	0.686745	1	3	-1.65794	16.5833	2	0	>sp|C4AMC7|WASH3_HUMAN Putative WAS protein family homolog 3 OS=Homo sapiens GN=WASH3P PE=1 SV=2
0	0	0	0	0	0	NaN	NaN	0	0	0	0	1	0	>sp|C9JRZ8|AK1BF_HUMAN Aldo-keto reductase family 1 member B15 OS=Homo sapiens GN=AKR1B15 PE=1 SV=2
0	0	0	0	0	0	NaN	NaN	0	0	0	0	1	0.00996016	>sp|C9JSJ3|BHMG1_HUMAN Basic helix-loop-helix and HMG box domain-containing protein 1 OS=Homo sapiens GN=BHMG1 PE=3 SV=2
0.321928	0	0	0	0	0	0.373901	0.686745	1	0	0.107309	0.25	4	0.00780031	>sp|D6REC4|CFA99_HUMAN Cilia- and flagella-associated protein 99 OS=Homo sapiens GN=CFAP99 PE=3 SV=1
1.77259	1.27302	0	0	1.05889	0	0.479725	0.799999	2	1	0.519488	4.91667	1	0.00299625	>sp|D6RF30|GOG8K_HUMAN Golgin subfamily A member 8K OS=Homo sapiens GN=GOLGA8K PE=3 SV=1
0	3.49185	0.115477	2.62449	2.11548	0	0.360175	0.686745	2	2	-1.29513	18.8333	1	0	>sp|E9PAV3|NACAM_HUMAN Nascent polypeptide-associated complex subunit alpha, muscle-specific form OS=Homo sapiens GN=NACA PE=1 SV=1
0	0	0	0	0	0	NaN	NaN	0	0	0	0	3	0	>sp|F5H284|PAL4D_HUMAN Peptidyl-prolyl cis-trans isomerase A-like 4D OS=Homo sapiens GN=PPIAL4D PE=3 SV=1
0	1.27302	0	0	1.05889	0	0.903351	0.972756	1	1	-0.0713749	2.5	3	0.00294334	>sp|F8WBI6|GOG8N_HUMAN Golgin subfamily A member 8N OS=Homo sapiens GN=GOLGA8N PE=3 SV=1
0	1.27302	0	0	1.05889	0	0.903351	0.972756	1	1	-0.0713749	2.5	3	0.00294118	>sp|H3BSY2|GOG8M_HUMAN Golgin subfamily A member 8M OS=Homo sapiens GN=GOLGA8M PE=3 SV=1
0	0.736966	0	0	0	0	0.373901	0.686745	0	1	-0.245655	0.666667	2	0.00187793	>sp|I3L1I5|YS060_HUMAN Putative uncharacterized protein LOC100996504 OS=Homo sapiens PE=5 SV=1
0	1.27302	0	0	1.05889	0	0.903351	0.972756	1	1	-0.0713749	2.5	3	0.00293686	>sp|I6L899|GOG8R_HUMAN Golgin subfamily A member 8R OS=Homo sapiens GN=GOLGA8R PE=3 SV=1
0	3.36923	2.22239	0	2.41504	2	0.85456	0.964759	2	2	-0.243935	20.3333	1	0	>sp|O00116|ADAS_HUMAN Alkyldihydroxyacetonephosphate synthase, peroxisomal OS=Homo sapiens GN=AGPS PE=1 SV=1
0.321928	0	0.5025	0	0	0	0.134837	0.686745	2	0	0.274809	0.666667	2	0	>sp|O00124|UBXN8_HUMAN UBX domain-containing protein 8 OS=Homo sapiens GN=UBXN8 PE=1 SV=2
0.321928	0	0	0	1.62449	0	0.261452	0.686745	2	0	0.648806	2.33333	1	0	>sp|O00139|KIF2A_HUMAN Kinesin-like protein KIF2A OS=Homo sapiens GN=KIF2A PE=1 SV=3
0.938599	0	1.22239	1.8413	1.64386	0	0.368982	0.686745	3	1	0.654515	6.95833	1	0	>sp|O00148|DX39A_HUMAN ATP-dependent RNA helicase DDX39A OS=Homo sapiens GN=DDX39A PE=1 SV=2
0.807355	0	0	0	1.11548	0	0.126229	0.686745	2	0	0.640944	1.91667	1	0	>sp|O00151|PDLI1_HUMAN PDZ and LIM domain protein 1 OS=Homo sapiens GN=PDLIM1 PE=1 SV=4
1.36923	0	1.54432	0	0	0	0.117551	0.686745	2	0	0.971185	3.5	1	0	>sp|O00154|BACH_HUMAN Cytosolic acyl coenzyme A thioester hydrolase OS=Homo sapiens GN=ACOT7 PE=1 SV=3
0	0.938599	0.662965	0	0	2.56478	0.292166	0.686745	1	2	-0.946806	6.41667	1	0	>sp|O00165|HAX1_HUMAN HCLS1-associated protein X-1 OS=Homo sapiens GN=HAX1 PE=1 SV=2
0	0	0	0	0	1.87447	0.373901	0.686745	0	1	-0.624823	2.66667	1	0	>sp|O00170|AIP_HUMAN AH receptor-interacting protein OS=Homo sapiens GN=AIP PE=1 SV=2
0	0	0	0	0.415037	0	0.373901	0.686745	1	0	0.138346	0.333333	2	0.00259572	>sp|O00182|LEG9_HUMAN Galectin-9 OS=Homo sapiens GN=LGALS9 PE=1 SV=2
0.874469	0.736966	0.5025	0	0	0	0.578122	0.865214	2	1	0.213335	1.91667	2	0	>sp|O00189|AP4M1_HUMAN AP-4 complex subunit mu-1 OS=Homo sapiens GN=AP4M1 PE=1 SV=2
0	0	0	0	0	0	NaN	NaN	0	0	0	0	2	0	>sp|O00193|SMAP_HUMAN Small acidic protein OS=Homo sapiens GN=SMAP PE=1 SV=1
2.54432	0.222392	0	0	0	0	0.414707	0.734658	1	1	0.773976	5	1	0	>sp|O00203|AP3B1_HUMAN AP-3 complex subunit beta-1 OS=Homo sapiens GN=AP3B1 PE=1 SV=3
0	0	0	0	0.415037	0.662965	0.767116	0.940709	1	1	-0.0826425	0.916667	2	0	>sp|O00217|NDUS8_HUMAN NADH dehydrogenase [ubiquinone] iron-sulfur protein 8, mitochondrial OS=Homo sapiens GN=NDUFS8 PE=1 SV=1
0	0	0	0	0	0.662965	0.373901	0.686745	0	1	-0.220988	0.583333	2	0	>sp|O00221|IKBE_HUMAN NF-kappa-B inhibitor epsilon OS=Homo sapiens GN=NFKBIE PE=1 SV=3
3.24793	3.26053	3.32193	3.18322	4.40372	4.05889	0.753543	0.940709	3	3	0.156978	70	1	0	>sp|O00231|PSD11_HUMAN 26S proteasome non-ATPase regulatory subunit 11 OS=Homo sapiens GN=PSMD11 PE=1 SV=3
3.35755	3.29768	4.30986	3.40372	4.49719	3.23522	0.105457	0.686745	3	3	0.742658	76.5	1	0	>sp|O00232|PSD12_HUMAN 26S proteasome non-ATPase regulatory subunit 12 OS=Homo sapiens GN=PSMD12 PE=1 SV=3
0	0	0	0	0	1.05889	0.373901	0.686745	0	1	-0.352965	1.08333	1	0	>sp|O00233|PSMD9_HUMAN 26S proteasome non-ATPase regulatory subunit 9 OS=Homo sapiens GN=PSMD9 PE=1 SV=3
2.02975	2.08746	2.05889	2.34577	2	0	0.498832	0.816939	3	2	0.551801	16.5833	2	0	>sp|O00255|MEN1_HUMAN Menin OS=Homo sapiens GN=MEN1 PE=1 SV=4
0	0	0	2.34577	0	0	0.373901	0.686745	0	1	-0.781925	4.08333	1	0	>sp|O00267|SPT5H_HUMAN Transcription elongation factor SPT5 OS=Homo sapiens GN=SUPT5H PE=1 SV=1
3.9386	3.23522	1.11548	3.77259	2.73697	2.56478	0.540898	0.849661	3	3	-0.593849	47.1667	1	0	>sp|O00268|TAF4_HUMAN Transcription initiation factor TFIID subunit 4 OS=Homo sapiens GN=TAF4 PE=1 SV=2
0	0	0	0	0	0	NaN	NaN	0	0	0	0	1	0.0021575	>sp|O00273|DFFA_HUMAN DNA fragmentation factor subunit alpha OS=Homo sapiens GN=DFFA PE=1 SV=1
0.874469	0	0.5025	0	1.05889	0.662965	0.0980728	0.686745	3	1	0.590966	2.91667	1	0	>sp|O00287|RFXAP_HUMAN Regulatory factor X-associated protein OS=Homo sapiens GN=RFXAP PE=1 SV=1
0	0	0	0	1.64386	1.05889	0.779721	0.944771	1	1	0.194988	3.20833	1	0	>sp|O00299|CLIC1_HUMAN Chloride intracellular channel protein 1 OS=Homo sapiens GN=CLIC1 PE=1 SV=4
0	0	1.41504	0	0	0	0.373901	0.686745	1	0	0.471679	1.66667	1	0	>sp|O00303|EIF3F_HUMAN Eukaryotic translation initiation factor 3 subunit F OS=Homo sapiens GN=EIF3F PE=1 SV=1
0	1.77259	1.11548	0.736966	0	0	0.504532	0.821699	1	2	-0.464693	4.25	1	0	>sp|O00329|PK3CD_HUMAN Phosphatidylinositol 4,5-bisphosphate 3-kinase catalytic subunit delta isoform OS=Homo sapiens GN=PIK3CD PE=1 SV=2
0.874469	0	1.73697	1.77259	0	0	0.736484	0.939104	2	1	0.279615	5.58333	1	0	>sp|O00400|ACATN_HUMAN Acetyl-coenzyme A transporter 1 OS=Homo sapiens GN=SLC33A1 PE=1 SV=1
0	0	0	2.22239	1.90689	0	0.91939	0.972756	1	1	-0.105167	6.41667	2	0	>sp|O00410|IPO5_HUMAN Importin-5 OS=Homo sapiens GN=IPO5 PE=1 SV=4
0	0	0	1.27302	0	0	0.373901	0.686745	0	1	-0.424339	1.41667	1	0	>sp|O00425|IF2B3_HUMAN Insulin-like growth factor 2 mRNA-binding protein 3 OS=Homo sapiens GN=IGF2BP3 PE=1 SV=2
3.51307	2.2854	1.32193	1.05889	2.70044	2.87447	0.626403	0.878706	3	3	0.438891	28.7083	1	0	>sp|O00429|DNM1L_HUMAN Dynamin-1-like protein OS=Homo sapiens GN=DNM1L PE=1 SV=2
0	0	0	0	0.415037	0	0.373901	0.686745	1	0	0.138346	0.333333	1	0.00227402	>sp|O00442|RTCA_HUMAN RNA 3'-terminal phosphate cyclase OS=Homo sapiens GN=RTCA PE=1 SV=1
0	0	1.11548	0	1.05889	1.77259	0.856243	0.964759	2	1	0.133927	4.66667	1	0	>sp|O00459|P85B_HUMAN Phosphatidylinositol 3-kinase regulatory subunit beta OS=Homo sapiens GN=PIK3R2 PE=1 SV=2
1.32193	1.27302	0	0	0	0	0.980015	0.992155	1	1	0.0163032	2.91667	2	0	>sp|O00461|GOLI4_HUMAN Golgi integral membrane protein 4 OS=Homo sapiens GN=GOLIM4 PE=1 SV=1
0.736966	2.51307	1.22239	1.96963	0	1.77259	0.0267774	0.686745	2	3	-1.43198	12.0417	2	0	>sp|O00471|EXOC5_HUMAN Exocyst complex component 5 OS=Homo sapiens GN=EXOC5 PE=1 SV=1
0	0	1.11548	0	0	0	0.373901	0.686745	1	0	0.371826	1.16667	2	0	>sp|O00478|BT3A3_HUMAN Butyrophilin subfamily 3 member A3 OS=Homo sapiens GN=BTN3A3 PE=1 SV=1
0	0	0.5025	0	0	0	0.373901	0.686745	1	0	0.1675	0.416667	4	0.0012747	>sp|O00481|BT3A1_HUMAN Butyrophilin subfamily 3 member A1 OS=Homo sapiens GN=BTN3A1 PE=1 SV=3
0	0	2.9542	1.62449	3.36923	3.23522	0.747307	0.940709	2	2	0.487908	26.5833	1	0	>sp|O00487|PSDE_HUMAN 26S proteasome non-ATPase regulatory subunit 14 OS=Homo sapiens GN=PSMD14 PE=1 SV=1
0	0	0	0	0	0	NaN	NaN	0	0	0	0	1	0	>sp|O00505|IMA4_HUMAN Importin subunit alpha-4 OS=Homo sapiens GN=KPNA3 PE=1 SV=2
0	0.662965	0	0	0	0	0.373901	0.686745	0	1	-0.220988	0.583333	2	0	>sp|O00506|STK25_HUMAN Serine/threonine-protein kinase 25 OS=Homo sapiens GN=STK25 PE=1 SV=1
0	0	0	0	0	0	NaN	NaN	0	0	0	0	2	0	>sp|O00541|PESC_HUMAN Pescadillo homolog OS=Homo sapiens GN=PES1 PE=1 SV=1
0.874469	0	0	0	1.05889	0.662965	0.343345	0.686745	2	1	0.423466	2.5	1	0	>sp|O00560|SDCB1_HUMAN Syntenin-1 OS=Homo sapiens GN=SDCBP PE=1 SV=1
0	0	1.73697	0	0	0	0.373901	0.686745	1	0	0.578989	2.33333	1	0	>sp|O00567|NOP56_HUMAN Nucleolar protein 56 OS=Homo sapiens GN=NOP56 PE=1 SV=4
0.736966	0	0.874469	2.48113	1.64386	0	0.782455	0.946593	3	1	0.258055	8.20833	2	0	>sp|O00571|DDX3X_HUMAN ATP-dependent RNA helicase DDX3X OS=Homo sapiens GN=DDX3X PE=1 SV=3
0	0	0	0	0	1.77259	0.373901	0.686745	0	1	-0.590863	2.41667	1	0.00115674	>sp|O00625|PIR_HUMAN Pirin OS=Homo sapiens GN=PIR PE=1 SV=1
0	0	0.5025	0	0	0	0.373901	0.686745	1	0	0.1675	0.416667	2	0.00229885	>sp|O00629|IMA3_HUMAN Importin subunit alpha-3 OS=Homo sapiens GN=KPNA4 PE=1 SV=1
0	0	0	0.736966	2	0	0.585346	0.869957	1	1	0.421011	3.66667	1	0	>sp|O00635|TRI38_HUMAN E3 ubiquitin-protein ligase TRIM38 OS=Homo sapiens GN=TRIM38 PE=1 SV=1
0	0	0	0	0.415037	0	0.373901	0.686745	1	0	0.138346	0.333333	1	0	>sp|O00743|PPP6_HUMAN Serine/threonine-protein phosphatase 6 catalytic subunit OS=Homo sapiens GN=PPP6C PE=1 SV=1
0	0	0	0	0	0.5025	0.373901	0.686745	0	1	-0.1675	0.416667	2	0	>sp|O00764|PDXK_HUMAN Pyridoxal kinase OS=Homo sapiens GN=PDXK PE=1 SV=1
0.321928	0	0	0	0	1.77259	0.465835	0.783726	1	1	-0.483554	2.66667	1	0	>sp|O00767|ACOD_HUMAN Acyl-CoA desaturase OS=Homo sapiens GN=SCD PE=1 SV=2
0.938599	0	1.73697	2.73697	1.62449	0	0.61104	0.878706	3	1	0.52103	11	2	0	>sp|O14492|SH2B2_HUMAN SH2B adapter protein 2 OS=Homo sapiens GN=SH2B2 PE=1 SV=2
3.69581	3.78136	2.70044	4.17659	0	2.56478	0.317684	0.686745	2	3	-1.3755	52.2083	1	0	>sp|O14497|ARI1A_HUMAN AT-rich interactive domain-containing protein 1A OS=Homo sapiens GN=ARID1A PE=1 SV=3
0	0	1.11548	0	1.05889	0	0.116386	0.686745	2	0	0.72479	2.25	2	0	>sp|O14519|CDKA1_HUMAN Cyclin-dependent kinase 2-associated protein 1 OS=Homo sapiens GN=CDK2AP1 PE=1 SV=1
2.34577	2.05889	0	1.77259	0	0	0.650497	0.893135	1	2	-0.495236	9.66667	2	0	>sp|O14526|FCHO1_HUMAN F-BAR domain only protein 1 OS=Homo sapiens GN=FCHO1 PE=1 SV=2
0	2.77259	1.73697	2.02975	2.73697	1.77259	0.458208	0.77931	2	3	-0.700332	19.3333	1	0	>sp|O14545|TRAD1_HUMAN TRAF-type zinc finger domain-containing protein 1 OS=Homo sapiens GN=TRAFD1 PE=1 SV=1
0	2.08746	2.52356	1.8413	1.05889	2.34577	0.295333	0.686745	2	3	-0.897361	15.75	2	0	>sp|O14579|COPE_HUMAN Coatomer subunit epsilon OS=Homo sapiens GN=COPE PE=1 SV=3
0.321928	0	0	0	0	0	0.373901	0.686745	1	0	0.107309	0.25	2	0.00906149	>sp|O14595|CTDS2_HUMAN Carboxy-terminal domain RNA polymerase II polypeptide A small phosphatase 2 OS=Homo sapiens GN=CTDSP2 PE=1 SV=2
0	0	0	0	0.415037	1.27302	0.556534	0.853691	1	1	-0.285994	1.75	2	0	>sp|O14618|CCS_HUMAN Copper chaperone for superoxide dismutase OS=Homo sapiens GN=CCS PE=1 SV=1
0	0	0	0	0	0	NaN	NaN	0	0	0	0	3	0	>sp|O14640|DVL1_HUMAN Segment polarity protein dishevelled homolog DVL-1 OS=Homo sapiens GN=DVL1 PE=1 SV=2
0	0	0	0	0	0	NaN	NaN	0	0	0	0	2	0	>sp|O14641|DVL2_HUMAN Segment polarity protein dishevelled homolog DVL-2 OS=Homo sapiens GN=DVL2 PE=1 SV=1
0	0	0.5025	0	0	0	0.373901	0.686745	1	0	0.1675	0.416667	2	0.00141143	>sp|O14662|STX16_HUMAN Syntaxin-16 OS=Homo sapiens GN=STX16 PE=1 SV=3
0	0.736966	0	0	0	0	0.373901	0.686745	0	1	-0.245655	0.666667	2	0	>sp|O14730|RIOK3_HUMAN Serine/threonine-protein kinase RIO3 OS=Homo sapiens GN=RIOK3 PE=1 SV=2
0	0	0.321928	0	0	2.9542	0.425775	0.74769	1	1	-0.877423	7	1	0	>sp|O14732|IMPA2_HUMAN Inositol monophosphatase 2 OS=Homo sapiens GN=IMPA2 PE=1 SV=1
2.16993	2.72792	2.05889	2.02975	1.62449	1.27302	0.902214	0.972756	3	3	-0.0591256	18.875	1	0	>sp|O14733|MP2K7_HUMAN Dual specificity mitogen-activated protein kinase kinase 7 OS=Homo sapiens GN=MAP2K7 PE=1 SV=2
0	1.27302	1.22239	0	1.05889	2.56478	0.567421	0.858621	2	2	-0.518839	8.75	2	0	>sp|O14734|ACOT8_HUMAN Acyl-coenzyme A thioesterase 8 OS=Homo sapiens GN=ACOT8 PE=1 SV=1
0.321928	0.736966	0	0	0	0	0.633015	0.878706	1	1	-0.138346	0.916667	2	0	>sp|O14735|CDIPT_HUMAN CDP-diacylglycerol--inositol 3-phosphatidyltransferase OS=Homo sapiens GN=CDIPT PE=1 SV=1
0	0	0	0	0	0.874469	0.373901	0.686745	0	1	-0.29149	0.833333	1	0	>sp|O14744|ANM5_HUMAN Protein arginine N-methyltransferase 5 OS=Homo sapiens GN=PRMT5 PE=1 SV=4
0	0	0	0	0	0	NaN	NaN	0	0	0	0	2	0	>sp|O14745|NHRF1_HUMAN Na(+)/H(+) exchange regulatory cofactor NHE-RF1 OS=Homo sapiens GN=SLC9A3R1 PE=1 SV=4
0	0	0	0	0	0	NaN	NaN	0	0	0	0	1	0.00145349	>sp|O14756|H17B6_HUMAN 17-beta-hydroxysteroid dehydrogenase type 6 OS=Homo sapiens GN=HSD17B6 PE=1 SV=1
0	0	1.11548	0	0	0	0.373901	0.686745	1	0	0.371826	1.16667	2	0	>sp|O14773|TPP1_HUMAN Tripeptidyl-peptidase 1 OS=Homo sapiens GN=TPP1 PE=1 SV=2
0	0	0	0	2.32193	0	0.373901	0.686745	1	0	0.773976	4	1	0	>sp|O14776|TCRG1_HUMAN Transcription elongation regulator 1 OS=Homo sapiens GN=TCERG1 PE=1 SV=2
1.77259	1.77259	1.73697	2.73697	1.62449	0	0.808189	0.946645	3	2	0.208164	14.9167	1	0	>sp|O14777|NDC80_HUMAN Kinetochore protein NDC80 homolog OS=Homo sapiens GN=NDC80 PE=1 SV=1
0	0	0	0	1.62449	0	0.373901	0.686745	1	0	0.541497	2.08333	3	0.00311769	>sp|O14782|KIF3C_HUMAN Kinesin-like protein KIF3C OS=Homo sapiens GN=KIF3C PE=1 SV=3
1.77259	1.77259	0	0	1.05889	0	0.675787	0.908709	2	1	0.352965	5.91667	2	0	>sp|O14787|TNPO2_HUMAN Transportin-2 OS=Homo sapiens GN=TNPO2 PE=1 SV=3
0	0	1.11548	0	0	0	0.373901	0.686745	1	0	0.371826	1.16667	2	0	>sp|O14810|CPLX1_HUMAN Complexin-1 OS=Homo sapiens GN=CPLX1 PE=1 SV=1
0	0	1.27302	1.45943	2.98489	3.52356	0.865522	0.969525	2	2	-0.241694	20.5833	1	0	>sp|O14818|PSA7_HUMAN Proteasome subunit alpha type-7 OS=Homo sapiens GN=PSMA7 PE=1 SV=1
0	2.75489	1.16993	0	0	1.27302	0.343005	0.686745	1	2	-0.95266	8.41667	1	0	>sp|O14828|SCAM3_HUMAN Secretory carrier-associated membrane protein 3 OS=Homo sapiens GN=SCAMP3 PE=1 SV=3
0.321928	0.736966	0	0	0	0	0.633015	0.878706	1	1	-0.138346	0.916667	2	0	>sp|O14874|BCKD_HUMAN [3-methyl-2-oxobutanoate dehydrogenase [lipoamide]] kinase, mitochondrial OS=Homo sapiens GN=BCKDK PE=1 SV=2
0	0	0	0	0	0.662965	0.373901	0.686745	0	1	-0.220988	0.583333	2	0.00298954	>sp|O14910|LIN7A_HUMAN Protein lin-7 homolog A OS=Homo sapiens GN=LIN7A PE=1 SV=2
0	0	0	1.8413	2.32193	0	0.879022	0.971961	1	1	0.160209	6.58333	1	0	>sp|O14920|IKKB_HUMAN Inhibitor of nuclear factor kappa-B kinase subunit beta OS=Homo sapiens GN=IKBKB PE=1 SV=1
0	0	0	0	1.62449	0	0.373901	0.686745	1	0	0.541497	2.08333	2	0	>sp|O14925|TIM23_HUMAN Mitochondrial import inner membrane translocase subunit Tim23 OS=Homo sapiens GN=TIMM23 PE=1 SV=1
0	0.584963	0.874469	0	0	1.70044	0.461273	0.782498	1	2	-0.470311	3.58333	1	0	>sp|O14929|HAT1_HUMAN Histone acetyltransferase type B catalytic subunit OS=Homo sapiens GN=HAT1 PE=1 SV=1
0	0	0	0	2.32193	0	0.373901	0.686745	1	0	0.773976	4	2	0	>sp|O14950|ML12B_HUMAN Myosin regulatory light chain 12B OS=Homo sapiens GN=MYL12B PE=1 SV=2
2.89077	2.75489	2.05889	2.73697	2.52356	2.02975	0.964347	0.986875	3	3	-0.0161246	28.8333	1	0	>sp|O14964|HGS_HUMAN Hepatocyte growth factor-regulated tyrosine kinase substrate OS=Homo sapiens GN=HGS PE=1 SV=1
0	0	0	0	1.05889	0	0.373901	0.686745	1	0	0.352965	1.08333	1	0.00976404	>sp|O14966|RAB7L_HUMAN Ras-related protein Rab-7L1 OS=Homo sapiens GN=RAB29 PE=1 SV=1
0	0	0	0	0	0	NaN	NaN	0	0	0	0	2	0	>sp|O14974|MYPT1_HUMAN Protein phosphatase 1 regulatory subunit 12A OS=Homo sapiens GN=PPP1R12A PE=1 SV=1
3.69581	2.98489	0	3.11548	2.73697	0	0.9448	0.978659	2	2	0.110801	32.2083	1	0	>sp|O14976|GAK_HUMAN Cyclin-G-associated kinase OS=Homo sapiens GN=GAK PE=1 SV=2
0	0	1.11548	0	1.62449	0	0.129659	0.686745	2	0	0.913323	3.25	2	0	>sp|O14979|HNRDL_HUMAN Heterogeneous nuclear ribonucleoprotein D-like OS=Homo sapiens GN=HNRNPDL PE=1 SV=3
3.77698	1.54432	0	3.78572	3.78136	3.23522	0.825823	0.956039	2	3	-0.33564	48.5833	1	0	>sp|O14980|XPO1_HUMAN Exportin-1 OS=Homo sapiens GN=XPO1 PE=1 SV=1
3.11548	2.54432	3.11548	2.9386	1.05889	0	0.627561	0.878706	3	2	0.602309	27.9167	2	0	>sp|O14981|BTAF1_HUMAN TATA-binding protein-associated factor 172 OS=Homo sapiens GN=BTAF1 PE=1 SV=2
1.62449	2.70966	0	0	1	0	0.979121	0.992155	2	1	-0.0283891	8.625	1	0	>sp|O14983|AT2A1_HUMAN Sarcoplasmic/endoplasmic reticulum calcium ATPase 1 OS=Homo sapiens GN=ATP2A1 PE=1 SV=1
2.54432	0	0	0	0	0	0.373901	0.686745	1	0	0.848107	4.83333	1	0.00204082	>sp|O15027|SC16A_HUMAN Protein transport protein Sec16A OS=Homo sapiens GN=SEC16A PE=1 SV=3
3.01495	2.1565	2.05889	2.41504	2	0	0.373461	0.686745	3	2	0.834101	21.0417	1	0	>sp|O15031|PLXB2_HUMAN Plexin-B2 OS=Homo sapiens GN=PLXNB2 PE=1 SV=3
2.02975	1.77259	1.16993	1	2.52356	2.56478	0.840848	0.963258	3	3	0.12862	17.4167	1	0	>sp|O15037|KHNYN_HUMAN Protein KHNYN OS=Homo sapiens GN=KHNYN PE=1 SV=3
0	0	0	0	1.62449	0	0.373901	0.686745	1	0	0.541497	2.08333	1	0.00304183	>sp|O15066|KIF3B_HUMAN Kinesin-like protein KIF3B OS=Homo sapiens GN=KIF3B PE=1 SV=1
0	0.584963	0	0	0	0	0.373901	0.686745	0	1	-0.194988	0.5	1	0	>sp|O15067|PUR4_HUMAN Phosphoribosylformylglycinamidine synthase OS=Homo sapiens GN=PFAS PE=1 SV=4
0	0	0	1.45943	0	1.27302	0.117964	0.686745	0	2	-0.910817	3.16667	1	0	>sp|O15084|ANR28_HUMAN Serine/threonine-protein phosphatase 6 regulatory ankyrin repeat subunit A OS=Homo sapiens GN=ANKRD28 PE=1 SV=5
2.02975	0	2.70044	2.34577	1.05889	0	0.278303	0.686745	3	1	1.14777	13.75	1	0	>sp|O15091|MRRP3_HUMAN Mitochondrial ribonuclease P protein 3 OS=Homo sapiens GN=KIAA0391 PE=1 SV=2
2.02975	0	0	2.02975	0	0	1	1	1	1	0	6.16667	1	0	>sp|O15111|IKKA_HUMAN Inhibitor of nuclear factor kappa-B kinase subunit alpha OS=Homo sapiens GN=CHUK PE=1 SV=2
0.321928	0	0	0	0	0	0.373901	0.686745	1	0	0.107309	0.25	1	0	>sp|O15121|DEGS1_HUMAN Sphingolipid delta(4)-desaturase DES1 OS=Homo sapiens GN=DEGS1 PE=1 SV=1
1.32193	1.27302	1.11548	0	2.32193	0.5025	0.131176	0.686745	3	2	0.994605	8.5	1	0	>sp|O15126|SCAM1_HUMAN Secretory carrier-associated membrane protein 1 OS=Homo sapiens GN=SCAMP1 PE=1 SV=2
2.34577	0.736966	0.5025	0.736966	0.415037	0	0.427267	0.748744	3	2	0.59646	6.16667	1	0	>sp|O15127|SCAM2_HUMAN Secretory carrier-associated membrane protein 2 OS=Homo sapiens GN=SCAMP2 PE=1 SV=2
0	0	0.5025	0	0.415037	0	0.119718	0.686745	2	0	0.305846	0.75	2	0	>sp|O15131|IMA6_HUMAN Importin subunit alpha-6 OS=Homo sapiens GN=KPNA5 PE=1 SV=2
0	0	0	0	0	0	NaN	NaN	0	0	0	0	1	0	>sp|O15143|ARC1B_HUMAN Actin-related protein 2/3 complex subunit 1B OS=Homo sapiens GN=ARPC1B PE=1 SV=3
0	0.736966	0	0	0	0	0.373901	0.686745	0	1	-0.245655	0.666667	1	0	>sp|O15144|ARPC2_HUMAN Actin-related protein 2/3 complex subunit 2 OS=Homo sapiens GN=ARPC2 PE=1 SV=1
0	0	0	0	1.05889	0	0.373901	0.686745	1	0	0.352965	1.08333	2	0	>sp|O15145|ARPC3_HUMAN Actin-related protein 2/3 complex subunit 3 OS=Homo sapiens GN=ARPC3 PE=1 SV=3
0.321928	1.27302	0	0	0.415037	0	0.707058	0.927629	2	1	-0.178684	2	2	0	>sp|O15151|MDM4_HUMAN Protein Mdm4 OS=Homo sapiens GN=MDM4 PE=1 SV=2
0	0	0	0	0.415037	0	0.373901	0.686745	1	0	0.138346	0.333333	2	0	>sp|O15155|BET1_HUMAN BET1 homolog OS=Homo sapiens GN=BET1 PE=1 SV=1
0	0	0.321928	0	1.05889	2.02975	0.78616	0.946645	2	1	-0.216309	4.41667	1	0	>sp|O15160|RPAC1_HUMAN DNA-directed RNA polymerases I and III subunit RPAC1 OS=Homo sapiens GN=POLR1C PE=1 SV=1
3.89885	3.70044	2.54432	4.09803	0.584963	2.16993	0.433675	0.7573	3	3	-0.980087	50.875	1	0	>sp|O15164|TIF1A_HUMAN Transcription intermediary factor 1-alpha OS=Homo sapiens GN=TRIM24 PE=1 SV=3
0.321928	0	1.11548	0.736966	0.415037	0	0.348948	0.686745	3	1	0.371826	2.41667	1	0	>sp|O15173|PGRC2_HUMAN Membrane-associated progesterone receptor component 2 OS=Homo sapiens GN=PGRMC2 PE=1 SV=1
0	0.736966	0	0	0.415037	0	0.722835	0.929125	1	1	-0.107309	1	2	0	>sp|O15198|SMAD9_HUMAN Mothers against decapentaplegic homolog 9 OS=Homo sapiens GN=SMAD9 PE=1 SV=1
2.63421	0.70044	1.73697	2.54432	1.36923	1.41504	0.611716	0.878706	3	3	0.360203	16.25	1	0	>sp|O15228|GNPAT_HUMAN Dihydroxyacetone phosphate acyltransferase OS=Homo sapiens GN=GNPAT PE=1 SV=1
0	0	0	0	0	0	NaN	NaN	0	0	0	0	1	0	>sp|O15254|ACOX3_HUMAN Peroxisomal acyl-coenzyme A oxidase 3 OS=Homo sapiens GN=ACOX3 PE=1 SV=2
1.32193	1.27302	1.11548	1.77259	0	0	0.776839	0.942898	2	2	-0.202734	6.5	2	0	>sp|O15258|RER1_HUMAN Protein RER1 OS=Homo sapiens GN=RER1 PE=1 SV=1
0.874469	0	0	0	0	0	0.373901	0.686745	1	0	0.29149	0.833333	2	0.00419874	>sp|O15259|NPHP1_HUMAN Nephrocystin-1 OS=Homo sapiens GN=NPHP1 PE=1 SV=1
2.02975	2.58496	2.52356	0	1.05889	0.662965	0.42426	0.74568	3	2	0.788092	14.5	2	0	>sp|O15260|SURF4_HUMAN Surfeit locus protein 4 OS=Homo sapiens GN=SURF4 PE=1 SV=3
0	0	0	0.736966	0.415037	0.662965	0.294078	0.686745	1	2	-0.328298	1.58333	3	0	>sp|O15264|MK13_HUMAN Mitogen-activated protein kinase 13 OS=Homo sapiens GN=MAPK13 PE=1 SV=1
0	0	0	0	0	0	NaN	NaN	0	0	0	0	1	0	>sp|O15269|SPTC1_HUMAN Serine palmitoyltransferase 1 OS=Homo sapiens GN=SPTLC1 PE=1 SV=1
0	0.736966	1.11548	0	0	0	0.791134	0.946645	1	1	0.126171	1.83333	1	0	>sp|O15287|FANCG_HUMAN Fanconi anemia group G protein OS=Homo sapiens GN=FANCG PE=1 SV=1
0	2.05889	1.73697	0	0.415037	1.27302	0.647265	0.891228	2	2	-0.393303	7.25	1	0	>sp|O15294|OGT1_HUMAN UDP-N-acetylglucosamine--peptide N-acetylglucosaminyltransferase 110 kDa subunit OS=Homo sapiens GN=OGT PE=1 SV=3
0.874469	0	1.73697	0	2.73697	3.24793	0.59356	0.874881	3	1	0.700158	17.3333	2	0	>sp|O15305|PMM2_HUMAN Phosphomannomutase 2 OS=Homo sapiens GN=PMM2 PE=1 SV=1
0	0	0	0	0	0.662965	0.373901	0.686745	0	1	-0.220988	0.583333	2	0	>sp|O15315|RA51B_HUMAN DNA repair protein RAD51 homolog 2 OS=Homo sapiens GN=RAD51B PE=1 SV=2
3.34577	2.58496	2.36923	2.68182	2	0	0.44564	0.767864	3	2	0.816074	26.75	2	0	>sp|O15320|CTGE5_HUMAN cTAGE family member 5 OS=Homo sapiens GN=CTAGE5 PE=1 SV=4
0.874469	2.34577	1.11548	2.02975	0.415037	0	0.437915	0.762477	3	2	-0.656846	9.5	2	0	>sp|O15321|TM9S1_HUMAN Transmembrane 9 superfamily member 1 OS=Homo sapiens GN=TM9SF1 PE=2 SV=2
0	0	0	0	0	0.662965	0.373901	0.686745	0	1	-0.220988	0.583333	2	0.00796813	>sp|O15347|HMGB3_HUMAN High mobility group protein B3 OS=Homo sapiens GN=HMGB3 PE=1 SV=4
0	0	0	0	2	0	0.373901	0.686745	1	0	0.666667	3	1	0	>sp|O15355|PPM1G_HUMAN Protein phosphatase 1G OS=Homo sapiens GN=PPM1G PE=1 SV=1
1.77259	0	0	0	0	0	0.373901	0.686745	1	0	0.590863	2.41667	1	0	>sp|O15357|SHIP2_HUMAN Phosphatidylinositol 3,4,5-trisphosphate 5-phosphatase 2 OS=Homo sapiens GN=INPPL1 PE=1 SV=2
2.02975	0	0	2.34577	0	0	0.923756	0.972756	1	1	-0.105342	7.16667	1	0	>sp|O15360|FANCA_HUMAN Fanconi anemia group A protein OS=Homo sapiens GN=FANCA PE=1 SV=2
0	2.34577	2.05889	1.27302	0	1.77259	0.2142	0.686745	1	3	-1.11083	11.0833	1	0	>sp|O15371|EIF3D_HUMAN Eukaryotic translation initiation factor 3 subunit D OS=Homo sapiens GN=EIF3D PE=1 SV=1
0	0	0	1.05889	2.52356	0.5025	0.738208	0.94039	1	2	0.320723	6.25	2	0	>sp|O15372|EIF3H_HUMAN Eukaryotic translation initiation factor 3 subunit H OS=Homo sapiens GN=EIF3H PE=1 SV=1
1.5025	0	2.36923	0	0	0	0.135655	0.686745	2	0	1.29058	6	1	0	>sp|O15379|HDAC3_HUMAN Histone deacetylase 3 OS=Homo sapiens GN=HDAC3 PE=1 SV=2
0.874469	0	0	0	0.415037	0	0.163968	0.686745	2	0	0.429836	1.16667	1	0	>sp|O15381|NVL_HUMAN Nuclear valosin-containing protein-like OS=Homo sapiens GN=NVL PE=1 SV=1
0	0	0	0	0.415037	0	0.373901	0.686745	1	0	0.138346	0.333333	2	0.00177305	>sp|O15392|BIRC5_HUMAN Baculoviral IAP repeat-containing protein 5 OS=Homo sapiens GN=BIRC5 PE=1 SV=3
1.77259	2	0	2.1964	1.62449	1.77259	0.213995	0.686745	2	3	-0.857302	13.5	1	0	>sp|O15397|IPO8_HUMAN Importin-8 OS=Homo sapiens GN=IPO8 PE=1 SV=2
0	0	0	0	0	0	NaN	NaN	0	0	0	0	1	0	>sp|O15400|STX7_HUMAN Syntaxin-7 OS=Homo sapiens GN=STX7 PE=1 SV=4
0	0	0.5025	0.736966	0	0	0.805642	0.946645	1	1	-0.0781551	1.08333	2	0	>sp|O15405|TOX3_HUMAN TOX high mobility group box family member 3 OS=Homo sapiens GN=TOX3 PE=1 SV=2
0	0	0.5025	0	0	0	0.373901	0.686745	1	0	0.1675	0.416667	1	0.00634921	>sp|O15427|MOT4_HUMAN Monocarboxylate transporter 4 OS=Homo sapiens GN=SLC16A3 PE=1 SV=1
0.807355	0	0	2.1964	1.64386	0	0.92713	0.972756	2	1	0.084938	6.45833	1	0	>sp|O15523|DDX3Y_HUMAN ATP-dependent RNA helicase DDX3Y OS=Homo sapiens GN=DDX3Y PE=1 SV=2
0.321928	0	0	0	0	0	0.373901	0.686745	1	0	0.107309	0.25	2	0.00428266	>sp|O15533|TPSN_HUMAN Tapasin OS=Homo sapiens GN=TAPBP PE=1 SV=1
0	0	0	0	0	0	NaN	NaN	0	0	0	0	1	0.00934579	>sp|O15541|R113A_HUMAN RING finger protein 113A OS=Homo sapiens GN=RNF113A PE=1 SV=1
0	0	0	0	0	0	NaN	NaN	0	0	0	0	1	0	>sp|O43143|DHX15_HUMAN Pre-mRNA-splicing factor ATP-dependent RNA helicase DHX15 OS=Homo sapiens GN=DHX15 PE=1 SV=2
1.32193	0	2.05889	1.77259	1.05889	0	0.250627	0.686745	3	1	0.889042	8.16667	1	0	>sp|O43148|MCES_HUMAN mRNA cap guanine-N7 methyltransferase OS=Homo sapiens GN=RNMT PE=1 SV=1
0.321928	0	0	0	0	0	0.373901	0.686745	1	0	0.107309	0.25	3	0.00162206	>sp|O43150|ASAP2_HUMAN Arf-GAP with SH3 domain, ANK repeat and PH domain-containing protein 2 OS=Homo sapiens GN=ASAP2 PE=1 SV=3
0	0	1.11548	1.27302	2.73697	1.77259	0.791962	0.946645	2	2	0.268945	10.6667	1	0	>sp|O43156|TTI1_HUMAN TELO2-interacting protein 1 homolog OS=Homo sapiens GN=TTI1 PE=1 SV=3
0.874469	1.27302	0	0	1.05889	0.662965	0.998668	1	2	2	-0.000873567	3.91667	1	0	>sp|O43164|PJA2_HUMAN E3 ubiquitin-protein ligase Praja-2 OS=Homo sapiens GN=PJA2 PE=1 SV=4
0	0	1.11548	0	0	0	0.373901	0.686745	1	0	0.371826	1.16667	1	0	>sp|O43172|PRP4_HUMAN U4/U6 small nuclear ribonucleoprotein Prp4 OS=Homo sapiens GN=PRPF4 PE=1 SV=2
0	0	3.08037	0	4.2854	3.80735	0.545846	0.853691	2	1	1.18614	38.9583	1	0	>sp|O43175|SERA_HUMAN D-3-phosphoglycerate dehydrogenase OS=Homo sapiens GN=PHGDH PE=1 SV=4
3.78136	3.94251	2.45943	3.01495	5.3502	4.25424	0.896741	0.972756	3	3	0.126429	96.5833	1	0	>sp|O43242|PSMD3_HUMAN 26S proteasome non-ATPase regulatory subunit 3 OS=Homo sapiens GN=PSMD3 PE=1 SV=2
0.874469	1.27302	1.73697	1.77259	1.62449	0	0.540122	0.849661	3	2	0.396773	9.08333	2	0	>sp|O43251|RFOX2_HUMAN RNA binding protein fox-1 homolog 2 OS=Homo sapiens GN=RBFOX2 PE=1 SV=3
0	0	0	0	0	0	NaN	NaN	0	0	0	0	1	0	>sp|O43252|PAPS1_HUMAN Bifunctional 3'-phosphoadenosine 5'-phosphosulfate synthase 1 OS=Homo sapiens GN=PAPSS1 PE=1 SV=2
1.73697	0	0	2.68182	0	1.27302	0.487168	0.807164	1	2	-0.739292	9.16667	1	0	>sp|O43264|ZW10_HUMAN Centromere/kinetochore protein zw10 homolog OS=Homo sapiens GN=ZW10 PE=1 SV=3
0	0	0	0	1.62449	1.27302	0.873042	0.969525	1	1	0.117157	3.5	1	0	>sp|O43290|SNUT1_HUMAN U4/U6.U5 tri-snRNP-associated protein 1 OS=Homo sapiens GN=SART1 PE=1 SV=1
0.321928	0	0	0	0	0	0.373901	0.686745	1	0	0.107309	0.25	2	0.00915033	>sp|O43291|SPIT2_HUMAN Kunitz-type protease inhibitor 2 OS=Homo sapiens GN=SPINT2 PE=1 SV=2
1.32193	2.34577	0	1.27302	0	0	0.397331	0.714711	1	2	-0.765622	7	1	0	>sp|O43299|AP5Z1_HUMAN AP-5 complex subunit zeta-1 OS=Homo sapiens GN=AP5Z1 PE=1 SV=2
0.321928	0	0	0	0	0	0.373901	0.686745	1	0	0.107309	0.25	2	0.0064	>sp|O43312|MTSS1_HUMAN Metastasis suppressor protein 1 OS=Homo sapiens GN=MTSS1 PE=1 SV=2
0	0	0	0	0	0	NaN	NaN	0	0	0	0	2	0	>sp|O43318|M3K7_HUMAN Mitogen-activated protein kinase kinase kinase 7 OS=Homo sapiens GN=MAP3K7 PE=1 SV=1
0	0	0	0	0	0	NaN	NaN	0	0	0	0	2	0	>sp|O43324|MCA3_HUMAN Eukaryotic translation elongation factor 1 epsilon-1 OS=Homo sapiens GN=EEF1E1 PE=1 SV=1
0	0	0	0	0.736966	0	0.373901	0.686745	1	0	0.245655	0.666667	1	0	>sp|O43390|HNRPR_HUMAN Heterogeneous nuclear ribonucleoprotein R OS=Homo sapiens GN=HNRNPR PE=1 SV=1
0	0	0	0	0	0	NaN	NaN	0	0	0	0	1	0	>sp|O43395|PRPF3_HUMAN U4/U6 small nuclear ribonucleoprotein Prp3 OS=Homo sapiens GN=PRPF3 PE=1 SV=2
0	0	0	0	0	0	NaN	NaN	0	0	0	0	2	0	>sp|O43396|TXNL1_HUMAN Thioredoxin-like protein 1 OS=Homo sapiens GN=TXNL1 PE=1 SV=3
3.01495	0	1.73697	2.34577	2.32193	0	0.142468	0.686745	3	1	1.57602	17.5	2	0	>sp|O43399|TPD54_HUMAN Tumor protein D54 OS=Homo sapiens GN=TPD52L2 PE=1 SV=2
0	0	0.5025	0	0	0	0.373901	0.686745	1	0	0.1675	0.416667	2	0.00907323	>sp|O43414|ERI3_HUMAN ERI1 exoribonuclease 3 OS=Homo sapiens GN=ERI3 PE=1 SV=2
0	0	0	0	1.05889	0	0.373901	0.686745	1	0	0.352965	1.08333	2	0	>sp|O43423|AN32C_HUMAN Acidic leucine-rich nuclear phosphoprotein 32 family member C OS=Homo sapiens GN=ANP32C PE=2 SV=1
0	0	0	0	1.05889	0.662965	0.767158	0.940709	1	1	0.131976	1.66667	2	0	>sp|O43427|FIBP_HUMAN Acidic fibroblast growth factor intracellular-binding protein OS=Homo sapiens GN=FIBP PE=1 SV=3
0	0	0	0	1.62449	0	0.373901	0.686745	1	0	0.541497	2.08333	1	0	>sp|O43447|PPIH_HUMAN Peptidyl-prolyl cis-trans isomerase H OS=Homo sapiens GN=PPIH PE=1 SV=1
0	0	0	0	0	0	NaN	NaN	0	0	0	0	1	0	>sp|O43464|HTRA2_HUMAN Serine protease HTRA2, mitochondrial OS=Homo sapiens GN=HTRA2 PE=1 SV=2
0	0.736966	0	0	0	0	0.373901	0.686745	0	1	-0.245655	0.666667	2	0	>sp|O43488|ARK72_HUMAN Aflatoxin B1 aldehyde reductase member 2 OS=Homo sapiens GN=AKR7A2 PE=1 SV=3
0	0	0	1.77259	2.32193	0	0.85999	0.966766	1	1	0.183113	6.41667	2	0	>sp|O43491|E41L2_HUMAN Band 4.1-like protein 2 OS=Homo sapiens GN=EPB41L2 PE=1 SV=1
0	0	1.73697	0	0	0	0.373901	0.686745	1	0	0.578989	2.33333	2	0	>sp|O43502|RA51C_HUMAN DNA repair protein RAD51 homolog 3 OS=Homo sapiens GN=RAD51C PE=1 SV=1
1.32193	0.736966	1.73697	2.02975	1.05889	1.05889	0.834112	0.961088	3	3	0.0973936	9.75	1	0	>sp|O43542|XRCC3_HUMAN DNA repair protein XRCC3 OS=Homo sapiens GN=XRCC3 PE=1 SV=1
0	0	0	0	1.62449	0	0.373901	0.686745	1	0	0.541497	2.08333	1	0	>sp|O43572|AKA10_HUMAN A-kinase anchor protein 10, mitochondrial OS=Homo sapiens GN=AKAP10 PE=1 SV=2
0	0	0	1.77259	0	1.77259	0.116117	0.686745	0	2	-1.18173	4.83333	2	0	>sp|O43583|DENR_HUMAN Density-regulated protein OS=Homo sapiens GN=DENR PE=1 SV=2
0	0	0	0	0	1.66297	0.373901	0.686745	0	1	-0.554322	2.16667	1	0	>sp|O43592|XPOT_HUMAN Exportin-T OS=Homo sapiens GN=XPOT PE=1 SV=2
3.30378	3.74595	3	3.1565	2.92283	3.24793	0.228808	0.686745	3	3	-0.307924	51.2917	1	0	>sp|O43615|TIM44_HUMAN Mitochondrial import inner membrane translocase subunit TIM44 OS=Homo sapiens GN=TIMM44 PE=1 SV=2
0	0	0	0	0.415037	0	0.373901	0.686745	1	0	0.138346	0.333333	2	0.0096231	>sp|O43617|TPPC3_HUMAN Trafficking protein particle complex subunit 3 OS=Homo sapiens GN=TRAPPC3 PE=1 SV=1
0	0	0	0	0	1.27302	0.373901	0.686745	0	1	-0.424339	1.41667	2	0	>sp|O43633|CHM2A_HUMAN Charged multivesicular body protein 2a OS=Homo sapiens GN=CHMP2A PE=1 SV=1
2.02975	0.736966	2.05889	1.27302	2.73697	2.75489	0.34769	0.686745	3	3	0.686912	19.75	2	0	>sp|O43681|ASNA_HUMAN ATPase ASNA1 OS=Homo sapiens GN=ASNA1 PE=1 SV=2
3.23522	1.66297	0	2.29768	4.24793	3.68182	0.971816	0.991032	2	3	-0.0531085	44.3333	1	0	>sp|O43683|BUB1_HUMAN Mitotic checkpoint serine/threonine-protein kinase BUB1 OS=Homo sapiens GN=BUB1 PE=1 SV=1
0	0	0	1.96963	0	0	0.373901	0.686745	0	1	-0.656542	2.91667	2	0	>sp|O43684|BUB3_HUMAN Mitotic checkpoint protein BUB3 OS=Homo sapiens GN=BUB3 PE=1 SV=1
0	0	0	0	0	0	NaN	NaN	0	0	0	0	1	0	>sp|O43707|ACTN4_HUMAN Alpha-actinin-4 OS=Homo sapiens GN=ACTN4 PE=1 SV=2
0	0	0	0	0	0	NaN	NaN	0	0	0	0	2	0.00661704	>sp|O43709|WBS22_HUMAN Probable 18S rRNA (guanine-N(7))-methyltransferase OS=Homo sapiens GN=WBSCR22 PE=1 SV=2
0	0	1.11548	0	0.415037	0.662965	0.503092	0.820116	2	1	0.289183	2.08333	3	0	>sp|O43739|CYH3_HUMAN Cytohesin-3 OS=Homo sapiens GN=CYTH3 PE=1 SV=2
0.321928	0	0	0	0	0	0.373901	0.686745	1	0	0.107309	0.25	4	0.00141543	>sp|O43741|AAKB2_HUMAN 5'-AMP-activated protein kinase subunit beta-2 OS=Homo sapiens GN=PRKAB2 PE=1 SV=1
2.02975	0	0	0	0	0	0.373901	0.686745	1	0	0.676582	3.08333	1	0	>sp|O43747|AP1G1_HUMAN AP-1 complex subunit gamma-1 OS=Homo sapiens GN=AP1G1 PE=1 SV=5
0	0	0	0	0.415037	0	0.373901	0.686745	1	0	0.138346	0.333333	2	0.00665557	>sp|O43759|SNG1_HUMAN Synaptogyrin-1 OS=Homo sapiens GN=SYNGR1 PE=1 SV=2
1.32193	0	1.11548	0	1.05889	1.41504	0.220626	0.686745	3	1	0.693754	5.41667	1	0	>sp|O43760|SNG2_HUMAN Synaptogyrin-2 OS=Homo sapiens GN=SYNGR2 PE=1 SV=1
0	0	0	0	0	0.5025	0.373901	0.686745	0	1	-0.1675	0.416667	1	0	>sp|O43765|SGTA_HUMAN Small glutamine-rich tetratricopeptide repeat-containing protein alpha OS=Homo sapiens GN=SGTA PE=1 SV=1
0	0	1.73697	0	0	0	0.373901	0.686745	1	0	0.578989	2.33333	1	0.00297177	>sp|O43772|MCAT_HUMAN Mitochondrial carnitine/acylcarnitine carrier protein OS=Homo sapiens GN=SLC25A20 PE=1 SV=1
0	0	0	0	0	0	NaN	NaN	0	0	0	0	1	0	>sp|O43776|SYNC_HUMAN Asparagine--tRNA ligase, cytoplasmic OS=Homo sapiens GN=NARS PE=1 SV=1
0	0.736966	0	0.736966	0	0	0.116117	0.686745	0	2	-0.49131	1.33333	4	0	>sp|O43790|KRT86_HUMAN Keratin, type II cuticular Hb6 OS=Homo sapiens GN=KRT86 PE=1 SV=1
2.34577	1.27302	0.5025	2.02975	0	1.77259	0.376512	0.688104	2	3	-0.74236	11.4167	2	0	>sp|O43808|PM34_HUMAN Peroxisomal membrane protein PMP34 OS=Homo sapiens GN=SLC25A17 PE=1 SV=1
0	0	0.662965	1.27302	0	0	0.692679	0.919465	1	1	-0.203351	2	1	0	>sp|O43809|CPSF5_HUMAN Cleavage and polyadenylation specificity factor subunit 5 OS=Homo sapiens GN=NUDT21 PE=1 SV=1
0	0	0	0	0	0.874469	0.373901	0.686745	0	1	-0.29149	0.833333	1	0	>sp|O43813|LANC1_HUMAN LanC-like protein 1 OS=Homo sapiens GN=LANCL1 PE=1 SV=1
0	0	0.5025	0	0	0	0.373901	0.686745	1	0	0.1675	0.416667	1	0.00333333	>sp|O43815|STRN_HUMAN Striatin OS=Homo sapiens GN=STRN PE=1 SV=4
0.874469	0	0	0	1.05889	2.02975	0.967939	0.988868	2	1	-0.0321282	5	1	0	>sp|O43819|SCO2_HUMAN Protein SCO2 homolog, mitochondrial OS=Homo sapiens GN=SCO2 PE=1 SV=3
0.321928	0	1.11548	0	0	0	0.221838	0.686745	2	0	0.479135	1.41667	1	0	>sp|O43823|AKAP8_HUMAN A-kinase anchor protein 8 OS=Homo sapiens GN=AKAP8 PE=1 SV=1
0	0	1.11548	2.02975	3.47032	3.24793	0.876634	0.971053	2	2	-0.230626	22.8333	2	0	>sp|O43837|IDH3B_HUMAN Isocitrate dehydrogenase [NAD] subunit beta, mitochondrial OS=Homo sapiens GN=IDH3B PE=1 SV=2
0	0	0	0	0	0	NaN	NaN	0	0	0	0	2	0.00501882	>sp|O43847|NRDC_HUMAN Nardilysin OS=Homo sapiens GN=NRD1 PE=1 SV=2
0	0	0	0.807355	0	0.5025	0.1372	0.686745	0	2	-0.436618	1.16667	1	0	>sp|O43852|CALU_HUMAN Calumenin OS=Homo sapiens GN=CALU PE=1 SV=2
0	0	0	0	0	0	NaN	NaN	0	0	0	0	1	0	>sp|O43865|SAHH2_HUMAN Adenosylhomocysteinase 2 OS=Homo sapiens GN=AHCYL1 PE=1 SV=2
0.874469	0	1.73697	1.27302	0	0	0.534292	0.844644	2	1	0.446139	4.58333	1	0	>sp|O43913|ORC5_HUMAN Origin recognition complex subunit 5 OS=Homo sapiens GN=ORC5 PE=1 SV=1
2.54432	1.77259	1.11548	1.27302	1.05889	1.27302	0.807997	0.946645	3	3	0.133355	12.3333	1	0	>sp|O43929|ORC4_HUMAN Origin recognition complex subunit 4 OS=Homo sapiens GN=ORC4 PE=1 SV=2
1.77259	0	0	2.02975	0	0	0.928565	0.972756	1	1	-0.0857193	5.5	2	0	>sp|O43933|PEX1_HUMAN Peroxisome biogenesis factor 1 OS=Homo sapiens GN=PEX1 PE=1 SV=1
0	0	0	0	1.62449	0	0.373901	0.686745	1	0	0.541497	2.08333	1	0	>sp|O60216|RAD21_HUMAN Double-strand-break repair protein rad21 homolog OS=Homo sapiens GN=RAD21 PE=1 SV=2
0	0	0	0	0	0	NaN	NaN	0	0	0	0	2	0	>sp|O60232|SSA27_HUMAN Sjoegren syndrome/scleroderma autoantigen 1 OS=Homo sapiens GN=SSSCA1 PE=1 SV=1
0	0	1.73697	0	2.52356	2.45943	0.616726	0.878706	2	1	0.600365	11.5833	1	0	>sp|O60256|KPRB_HUMAN Phosphoribosyl pyrophosphate synthase-associated protein 2 OS=Homo sapiens GN=PRPSAP2 PE=1 SV=1
0	0	0	0	0.415037	0	0.373901	0.686745	1	0	0.138346	0.333333	2	0.00175593	>sp|O60262|GBG7_HUMAN Guanine nucleotide-binding protein G(I)/G(S)/G(O) subunit gamma-7 OS=Homo sapiens GN=GNG7 PE=1 SV=1
2.89077	2.05889	0	2.29768	2.52356	0	0.777265	0.943024	2	2	0.352586	18.25	1	0	>sp|O60264|SMCA5_HUMAN SWI/SNF-related matrix-associated actin-dependent regulator of chromatin subfamily A member 5 OS=Homo sapiens GN=SMARCA5 PE=1 SV=1
1.77259	1.27302	0.5025	0	1.05889	1.77259	0.888414	0.972756	3	2	0.0961252	7.75	3	0	>sp|O60282|KIF5C_HUMAN Kinesin heavy chain isoform 5C OS=Homo sapiens GN=KIF5C PE=1 SV=1
2.1565	1.80735	2.9386	3.59495	3.22239	3.14296	0.90905	0.972756	3	3	-0.075921	39.875	2	0	>sp|O60313|OPA1_HUMAN Dynamin-like 120 kDa protein, mitochondrial OS=Homo sapiens GN=OPA1 PE=1 SV=3
3.61471	2.61471	0	0	3.56478	3.11548	0.769116	0.940709	2	2	0.483102	34.875	1	0	>sp|O60341|KDM1A_HUMAN Lysine-specific histone demethylase 1A OS=Homo sapiens GN=KDM1A PE=1 SV=2
0	0	0	0	1.05889	0	0.373901	0.686745	1	0	0.352965	1.08333	3	0.0017452	>sp|O60361|NDK8_HUMAN Putative nucleoside diphosphate kinase OS=Homo sapiens GN=NME2P1 PE=5 SV=1
0	0.736966	0	0	0	0	0.373901	0.686745	0	1	-0.245655	0.666667	1	0	>sp|O60427|FADS1_HUMAN Fatty acid desaturase 1 OS=Homo sapiens GN=FADS1 PE=1 SV=3
1.77259	1.77259	0.5025	0	1.05889	0	0.496075	0.815572	3	1	0.520465	6.33333	1	0	>sp|O60476|MA1A2_HUMAN Mannosyl-oligosaccharide 1,2-alpha-mannosidase IB OS=Homo sapiens GN=MAN1A2 PE=1 SV=1
2.89077	3.97728	3.68182	3.76818	2.16993	0.807355	0.957411	0.982617	3	3	0.0632336	49.875	1	0	>sp|O60488|ACSL4_HUMAN Long-chain-fatty-acid--CoA ligase 4 OS=Homo sapiens GN=ACSL4 PE=1 SV=2
1.32193	0	0	1.77259	0	0	0.848455	0.964759	1	1	-0.15022	3.91667	1	0.00774593	>sp|O60502|OGA_HUMAN Protein O-GlcNAcase OS=Homo sapiens GN=MGEA5 PE=1 SV=2
0	0	0	0	0	0	NaN	NaN	0	0	0	0	2	0	>sp|O60506|HNRPQ_HUMAN Heterogeneous nuclear ribonucleoprotein Q OS=Homo sapiens GN=SYNCRIP PE=1 SV=2
0	0	0	2.73697	2.73697	0	1	1	1	1	0	11.3333	1	0	>sp|O60518|RNBP6_HUMAN Ran-binding protein 6 OS=Homo sapiens GN=RANBP6 PE=1 SV=2
0	0.736966	0	0	0.415037	0	0.722835	0.929125	1	1	-0.107309	1	1	0	>sp|O60547|GMDS_HUMAN GDP-mannose 4,6 dehydratase OS=Homo sapiens GN=GMDS PE=1 SV=1
2.54432	1.27302	2.36923	2.73697	2	2.75489	0.928177	0.972756	3	3	0.0495609	24.8333	2	0	>sp|O60573|IF4E2_HUMAN Eukaryotic translation initiation factor 4E type 2 OS=Homo sapiens GN=EIF4E2 PE=1 SV=1
0.874469	1.77259	1.11548	1.27302	0.415037	1.27302	0.0733959	0.686745	3	3	-0.637881	7.58333	3	0	>sp|O60641|AP180_HUMAN Clathrin coat assembly protein AP180 OS=Homo sapiens GN=SNAP91 PE=1 SV=2
2.5025	0	0	2.1964	0	0	0.931172	0.972779	1	1	0.102034	8.25	1	0	>sp|O60645|EXOC3_HUMAN Exocyst complex component 3 OS=Homo sapiens GN=EXOC3 PE=1 SV=2
0	0	0	0	0	0	NaN	NaN	0	0	0	0	2	0	>sp|O60664|PLIN3_HUMAN Perilipin-3 OS=Homo sapiens GN=PLIN3 PE=1 SV=3
0	0	0.5025	0	0	0	0.373901	0.686745	1	0	0.1675	0.416667	1	0.00330033	>sp|O60671|RAD1_HUMAN Cell cycle checkpoint protein RAD1 OS=Homo sapiens GN=RAD1 PE=1 SV=1
0	0	0	0	0.415037	0	0.373901	0.686745	1	0	0.138346	0.333333	2	0	>sp|O60678|ANM3_HUMAN Protein arginine N-methyltransferase 3 OS=Homo sapiens GN=PRMT3 PE=1 SV=3
0	0	0.5025	0	0.415037	0	0.119718	0.686745	2	0	0.305846	0.75	2	0	>sp|O60684|IMA7_HUMAN Importin subunit alpha-7 OS=Homo sapiens GN=KPNA6 PE=1 SV=1
0	0	0	0	0.415037	0	0.373901	0.686745	1	0	0.138346	0.333333	1	0	>sp|O60701|UGDH_HUMAN UDP-glucose 6-dehydrogenase OS=Homo sapiens GN=UGDH PE=1 SV=1
2.34577	0.662965	2.36923	1.77259	2.92283	2.34577	0.146082	0.686745	3	3	0.95217	21.9167	1	0	>sp|O60711|LPXN_HUMAN Leupaxin OS=Homo sapiens GN=LPXN PE=1 SV=1
0	1.27302	0	0	0	0	0.373901	0.686745	0	1	-0.424339	1.41667	1	0.00504626	>sp|O60725|ICMT_HUMAN Protein-S-isoprenylcysteine O-methyltransferase OS=Homo sapiens GN=ICMT PE=1 SV=1
0	0	0	0	1.05889	0	0.373901	0.686745	1	0	0.352965	1.08333	1	0	>sp|O60739|EIF1B_HUMAN Eukaryotic translation initiation factor 1b OS=Homo sapiens GN=EIF1B PE=1 SV=2
0.874469	1.77259	0	0	2.32193	0	0.625341	0.878706	2	1	0.474603	7.25	1	0	>sp|O60749|SNX2_HUMAN Sorting nexin-2 OS=Homo sapiens GN=SNX2 PE=1 SV=2
1.32193	0	1.11548	0.736966	1.62449	1.27302	0.160433	0.686745	3	2	0.683971	6.83333	1	0	>sp|O60759|CYTIP_HUMAN Cytohesin-interacting protein OS=Homo sapiens GN=CYTIP PE=1 SV=2
0	0	3.68182	0.807355	0.736966	2.89077	0.873572	0.96954	2	2	0.240221	19.6667	2	0	>sp|O60762|DPM1_HUMAN Dolichol-phosphate mannosyltransferase subunit 1 OS=Homo sapiens GN=DPM1 PE=1 SV=1
0	2.08746	0	0	0	0	0.373901	0.686745	0	1	-0.695821	3.25	1	0	>sp|O60763|USO1_HUMAN General vesicular transport factor p115 OS=Homo sapiens GN=USO1 PE=1 SV=2
0.874469	0.736966	1.73697	1.27302	2	0	0.158986	0.686745	3	2	0.86715	8.25	1	0	>sp|O60784|TOM1_HUMAN Target of Myb protein 1 OS=Homo sapiens GN=TOM1 PE=1 SV=2
0	0	0	0	2.52356	0	0.373901	0.686745	1	0	0.841187	4.75	3	0	>sp|O60812|HNRC1_HUMAN Heterogeneous nuclear ribonucleoprotein C-like 1 OS=Homo sapiens GN=HNRNPCL1 PE=2 SV=1
0	0	1.73697	2.54432	3.22239	0	0.557492	0.853691	2	1	0.805012	15.5	2	0	>sp|O60814|H2B1K_HUMAN Histone H2B type 1-K OS=Homo sapiens GN=HIST1H2BK PE=1 SV=3
0	0	1.11548	0	0	0	0.373901	0.686745	1	0	0.371826	1.16667	1	0.0027027	>sp|O60825|F262_HUMAN 6-phosphofructo-2-kinase/fructose-2,6-bisphosphatase 2 OS=Homo sapiens GN=PFKFB2 PE=1 SV=2
2.16993	2.75489	1.11548	0	0	1.77259	0.705836	0.927629	2	2	-0.414025	12.8333	1	0	>sp|O60826|CCD22_HUMAN Coiled-coil domain-containing protein 22 OS=Homo sapiens GN=CCDC22 PE=1 SV=1
0	0	0	0	0	0	NaN	NaN	0	0	0	0	1	0	>sp|O60884|DNJA2_HUMAN DnaJ homolog subfamily A member 2 OS=Homo sapiens GN=DNAJA2 PE=1 SV=1
0	0	0.5025	0	0	0	0.373901	0.686745	1	0	0.1675	0.416667	1	0.00305111	>sp|O60911|CATL2_HUMAN Cathepsin L2 OS=Homo sapiens GN=CTSV PE=1 SV=2
0.321928	0	0	0	0	0	0.373901	0.686745	1	0	0.107309	0.25	1	0.00285919	>sp|O60921|HUS1_HUMAN Checkpoint protein HUS1 OS=Homo sapiens GN=HUS1 PE=1 SV=1
0	0	0	0	0.415037	0	0.373901	0.686745	1	0	0.138346	0.333333	2	0	>sp|O60925|PFD1_HUMAN Prefoldin subunit 1 OS=Homo sapiens GN=PFDN1 PE=1 SV=2
0	0	0	1.27302	1.62449	2.02975	0.524111	0.836233	1	2	-0.559425	6.58333	1	0	>sp|O60942|MCE1_HUMAN mRNA-capping enzyme OS=Homo sapiens GN=RNGTT PE=1 SV=1
2.73697	3.42626	2.9542	2.9386	2.32193	2.56478	0.381278	0.693381	3	3	-0.30552	37.75	2	0	>sp|O75027|ABCB7_HUMAN ATP-binding cassette sub-family B member 7, mitochondrial OS=Homo sapiens GN=ABCB7 PE=1 SV=2
0	0	0.5025	0	0	0	0.373901	0.686745	1	0	0.1675	0.416667	1	0.00711744	>sp|O75031|HSF2B_HUMAN Heat shock factor 2-binding protein OS=Homo sapiens GN=HSF2BP PE=1 SV=1
0	0	0	0	0	0	NaN	NaN	0	0	0	0	2	0	>sp|O75083|WDR1_HUMAN WD repeat-containing protein 1 OS=Homo sapiens GN=WDR1 PE=1 SV=4
0	2.05889	0	0	0	0	0.373901	0.686745	0	1	-0.686298	3.16667	1	0	>sp|O75112|LDB3_HUMAN LIM domain-binding protein 3 OS=Homo sapiens GN=LDB3 PE=1 SV=2
1.75489	4.33985	0.115477	1.36923	2.92283	2.34577	0.414247	0.734201	3	3	-1.08722	33.9583	2	0	>sp|O75122|CLAP2_HUMAN CLIP-associating protein 2 OS=Homo sapiens GN=CLASP2 PE=1 SV=2
2.16993	2.08746	2.36923	1.36923	2	1.77259	0.135027	0.686745	3	3	0.436624	17.9167	1	0	>sp|O75127|PTCD1_HUMAN Pentatricopeptide repeat-containing protein 1, mitochondrial OS=Homo sapiens GN=PTCD1 PE=1 SV=2
0	0	0	0	0	0	NaN	NaN	0	0	0	0	1	0	>sp|O75131|CPNE3_HUMAN Copine-3 OS=Homo sapiens GN=CPNE3 PE=1 SV=1
0	0	0	0	0	0	NaN	NaN	0	0	0	0	2	0	>sp|O75143|ATG13_HUMAN Autophagy-related protein 13 OS=Homo sapiens GN=ATG13 PE=1 SV=1
3.23522	2.02975	2.05889	2.9386	2.52356	2.34577	0.718361	0.929125	3	3	0.16785	30.1667	1	0	>sp|O75146|HIP1R_HUMAN Huntingtin-interacting protein 1-related protein OS=Homo sapiens GN=HIP1R PE=1 SV=2
0	0	0	0	0	0	NaN	NaN	0	0	0	0	2	0	>sp|O75150|BRE1B_HUMAN E3 ubiquitin-protein ligase BRE1B OS=Homo sapiens GN=RNF40 PE=1 SV=4
0	0	0	0	0	0	NaN	NaN	0	0	0	0	2	0.00359712	>sp|O75153|CLU_HUMAN Clustered mitochondria protein homolog OS=Homo sapiens GN=CLUH PE=1 SV=2
2.83289	0	0	2.54432	0	0	0.943229	0.978486	1	1	0.0961898	10.9583	1	0	>sp|O75155|CAND2_HUMAN Cullin-associated NEDD8-dissociated protein 2 OS=Homo sapiens GN=CAND2 PE=1 SV=3
0	2.75489	3.11548	2.54432	2.92283	2.56478	0.579362	0.86614	2	3	-0.608561	29.75	1	0	>sp|O75165|DJC13_HUMAN DnaJ homolog subfamily C member 13 OS=Homo sapiens GN=DNAJC13 PE=1 SV=5
0	0.222392	0	1.90689	1.62449	1.77259	0.377262	0.688898	1	3	-0.759127	7.41667	1	0	>sp|O75175|CNOT3_HUMAN CCR4-NOT transcription complex subunit 3 OS=Homo sapiens GN=CNOT3 PE=1 SV=1
2.02975	2.58496	0	0	0	0	0.874049	0.96954	1	1	-0.185072	8.08333	3	0	>sp|O75179|ANR17_HUMAN Ankyrin repeat domain-containing protein 17 OS=Homo sapiens GN=ANKRD17 PE=1 SV=3
0	0	4.18653	0	3.73697	4.60239	0.614233	0.878706	2	1	1.10703	52.8333	2	0	>sp|O75190|DNJB6_HUMAN DnaJ homolog subfamily B member 6 OS=Homo sapiens GN=DNAJB6 PE=1 SV=2
0	0	0	0	0	0	NaN	NaN	0	0	0	0	2	0	>sp|O75223|GGCT_HUMAN Gamma-glutamylcyclotransferase OS=Homo sapiens GN=GGCT PE=1 SV=1
0	0	0	0	0.415037	0	0.373901	0.686745	1	0	0.138346	0.333333	2	0	>sp|O75251|NDUS7_HUMAN NADH dehydrogenase [ubiquinone] iron-sulfur protein 7, mitochondrial OS=Homo sapiens GN=NDUFS7 PE=1 SV=3
1.11548	2.5025	3.32193	2.75489	1.90689	3.01495	0.386685	0.701313	3	3	-0.642681	30.4167	1	0	>sp|O75306|NDUS2_HUMAN NADH dehydrogenase [ubiquinone] iron-sulfur protein 2, mitochondrial OS=Homo sapiens GN=NDUFS2 PE=1 SV=2
0	0	0	0	0	0	NaN	NaN	0	0	0	0	2	0	>sp|O75312|ZPR1_HUMAN Zinc finger protein ZPR1 OS=Homo sapiens GN=ZPR1 PE=1 SV=1
0.874469	0	0	0	0	0	0.373901	0.686745	1	0	0.29149	0.833333	2	0.00185014	>sp|O75323|NIPS2_HUMAN Protein NipSnap homolog 2 OS=Homo sapiens GN=GBAS PE=1 SV=1
0	0	0	0	1.62449	0	0.373901	0.686745	1	0	0.541497	2.08333	1	0	>sp|O75340|PDCD6_HUMAN Programmed cell death protein 6 OS=Homo sapiens GN=PDCD6 PE=1 SV=1
0	0.584963	2.36923	2.34577	2.32193	0	0.606996	0.877334	2	2	0.586808	12.75	1	0	>sp|O75351|VPS4B_HUMAN Vacuolar protein sorting-associated protein 4B OS=Homo sapiens GN=VPS4B PE=1 SV=2
0	0	1.73697	1.27302	0	0	0.839966	0.962457	1	1	0.154649	3.75	2	0	>sp|O75352|MPU1_HUMAN Mannose-P-dolichol utilization defect 1 protein OS=Homo sapiens GN=MPDU1 PE=1 SV=2
0	0	0	0	0	1.27302	0.373901	0.686745	0	1	-0.424339	1.41667	2	0.0063762	>sp|O75367|H2AY_HUMAN Core histone macro-H2A.1 OS=Homo sapiens GN=H2AFY PE=1 SV=4
2.61471	4.04439	0	3.79442	4.06609	0	0.837901	0.962457	2	2	-0.386004	49.25	1	0	>sp|O75369|FLNB_HUMAN Filamin-B OS=Homo sapiens GN=FLNB PE=1 SV=2
3.34577	3.59495	0	2.73697	2.73697	2.02975	0.536214	0.846104	2	3	-0.75964	34.6667	1	0	>sp|O75376|NCOR1_HUMAN Nuclear receptor corepressor 1 OS=Homo sapiens GN=NCOR1 PE=1 SV=2
0.938599	0	2.05889	1.77259	2	0	0.196315	0.686745	3	1	1.07497	9.5	2	0	>sp|O75390|CISY_HUMAN Citrate synthase, mitochondrial OS=Homo sapiens GN=CS PE=1 SV=2
0	0	0	0	0	1.27302	0.373901	0.686745	0	1	-0.424339	1.41667	3	0	>sp|O75391|SPAG7_HUMAN Sperm-associated antigen 7 OS=Homo sapiens GN=SPAG7 PE=1 SV=2
0	0	1.8413	0	0.222392	3.23522	0.765772	0.940709	2	1	-0.390507	11.1667	1	0	>sp|O75396|SC22B_HUMAN Vesicle-trafficking protein SEC22b OS=Homo sapiens GN=SEC22B PE=1 SV=4
2.32193	0	1.77259	1.45943	0	2.56478	0.982789	0.993171	2	2	0.0234338	13.0833	1	0	>sp|O75419|CDC45_HUMAN Cell division control protein 45 homolog OS=Homo sapiens GN=CDC45 PE=1 SV=1
2.54432	1.77259	0.5025	0	0.415037	0.662965	0.713217	0.929125	3	2	0.342101	8.58333	1	0	>sp|O75427|LRCH4_HUMAN Leucine-rich repeat and calponin homology domain-containing protein 4 OS=Homo sapiens GN=LRCH4 PE=1 SV=2
0.874469	0	0	0	0	0	0.373901	0.686745	1	0	0.29149	0.833333	2	0	>sp|O75431|MTX2_HUMAN Metaxin-2 OS=Homo sapiens GN=MTX2 PE=1 SV=1
0	0	0	0	1.05889	0	0.373901	0.686745	1	0	0.352965	1.08333	1	0	>sp|O75436|VP26A_HUMAN Vacuolar protein sorting-associated protein 26A OS=Homo sapiens GN=VPS26A PE=1 SV=2
0	0	0	0	0	0	NaN	NaN	0	0	0	0	1	0	>sp|O75439|MPPB_HUMAN Mitochondrial-processing peptidase subunit beta OS=Homo sapiens GN=PMPCB PE=1 SV=2
1.77259	3.23522	3.11548	3.68182	1.62449	1.27302	0.559166	0.853845	3	3	-0.559167	33.8333	2	0	>sp|O75448|MED24_HUMAN Mediator of RNA polymerase II transcription subunit 24 OS=Homo sapiens GN=MED24 PE=1 SV=1
2.02975	1.77259	0	0.415037	2.32193	0	0.470205	0.788873	2	2	0.721349	9.83333	1	0	>sp|O75475|PSIP1_HUMAN PC4 and SFRS1-interacting protein OS=Homo sapiens GN=PSIP1 PE=1 SV=1
0	0	0.115477	0	2.52356	1.96963	0.842465	0.964363	2	1	0.223138	7.75	1	0	>sp|O75477|ERLN1_HUMAN Erlin-1 OS=Homo sapiens GN=ERLIN1 PE=1 SV=1
0.938599	0	2.52356	0	2.75489	3.69116	0.568379	0.859346	3	1	0.841962	23.3333	1	0	>sp|O75489|NDUS3_HUMAN NADH dehydrogenase [ubiquinone] iron-sulfur protein 3, mitochondrial OS=Homo sapiens GN=NDUFS3 PE=1 SV=1
0	0	0.5025	0	0	0	0.373901	0.686745	1	0	0.1675	0.416667	2	0.00296736	>sp|O75496|GEMI_HUMAN Geminin OS=Homo sapiens GN=GMNN PE=1 SV=1
0	0	1.11548	0	0	0	0.373901	0.686745	1	0	0.371826	1.16667	2	0	>sp|O75521|ECI2_HUMAN Enoyl-CoA delta isomerase 2, mitochondrial OS=Homo sapiens GN=ECI2 PE=1 SV=4
0	0	0	0	0	0	NaN	NaN	0	0	0	0	3	0	>sp|O75525|KHDR3_HUMAN KH domain-containing, RNA-binding, signal transduction-associated protein 3 OS=Homo sapiens GN=KHDRBS3 PE=1 SV=1
0	0	0	0	1.05889	0	0.373901	0.686745	1	0	0.352965	1.08333	3	0	>sp|O75526|RMXL2_HUMAN RNA-binding motif protein, X-linked-like-2 OS=Homo sapiens GN=RBMXL2 PE=1 SV=3
2.1964	3.47032	1.16993	0	0	0	0.980297	0.992171	2	1	-0.0346659	14.9167	1	0	>sp|O75533|SF3B1_HUMAN Splicing factor 3B subunit 1 OS=Homo sapiens GN=SF3B1 PE=1 SV=3
0	0	0	1.77259	0	0	0.373901	0.686745	0	1	-0.590863	2.41667	1	0	>sp|O75534|CSDE1_HUMAN Cold shock domain-containing protein E1 OS=Homo sapiens GN=CSDE1 PE=1 SV=2
0	0	0	0	0	1.27302	0.373901	0.686745	0	1	-0.424339	1.41667	2	0.00794834	>sp|O75569|PRKRA_HUMAN Interferon-inducible double-stranded RNA-dependent protein kinase activator A OS=Homo sapiens GN=PRKRA PE=1 SV=1
0	0	0	0	0	0	NaN	NaN	0	0	0	0	2	0.00328407	>sp|O75586|MED6_HUMAN Mediator of RNA polymerase II transcription subunit 6 OS=Homo sapiens GN=MED6 PE=1 SV=2
0	0	0	0	3.22239	0	0.373901	0.686745	1	0	1.07413	8.33333	1	0	>sp|O75592|MYCB2_HUMAN E3 ubiquitin-protein ligase MYCBP2 OS=Homo sapiens GN=MYCBP2 PE=1 SV=3
0.874469	0	1.73697	1.27302	0	0	0.534292	0.844644	2	1	0.446139	4.58333	1	0	>sp|O75600|KBL_HUMAN 2-amino-3-ketobutyrate coenzyme A ligase, mitochondrial OS=Homo sapiens GN=GCAT PE=1 SV=1
0	0	0	0	0.415037	0	0.373901	0.686745	1	0	0.138346	0.333333	1	0	>sp|O75607|NPM3_HUMAN Nucleoplasmin-3 OS=Homo sapiens GN=NPM3 PE=1 SV=3
0	0	0	0	0	0	NaN	NaN	0	0	0	0	2	0	>sp|O75608|LYPA1_HUMAN Acyl-protein thioesterase 1 OS=Homo sapiens GN=LYPLA1 PE=1 SV=1
0	0	0	0	0.415037	0	0.373901	0.686745	1	0	0.138346	0.333333	1	0	>sp|O75616|ERAL1_HUMAN GTPase Era, mitochondrial OS=Homo sapiens GN=ERAL1 PE=1 SV=2
5.08392	2.24793	0	3.40939	3.56986	0	0.610262	0.878706	2	2	0.99882	57.1667	1	0	>sp|O75643|U520_HUMAN U5 small nuclear ribonucleoprotein 200 kDa helicase OS=Homo sapiens GN=SNRNP200 PE=1 SV=2
1.54432	0	0	0	2	0	0.122649	0.686745	2	0	1.18144	4.91667	1	0	>sp|O75663|TIPRL_HUMAN TIP41-like protein OS=Homo sapiens GN=TIPRL PE=1 SV=2
0	0	0	0.736966	0	0	0.373901	0.686745	0	1	-0.245655	0.666667	2	0.00812458	>sp|O75676|KS6A4_HUMAN Ribosomal protein S6 kinase alpha-4 OS=Homo sapiens GN=RPS6KA4 PE=1 SV=1
0	0	0	1.27302	0	0	0.373901	0.686745	0	1	-0.424339	1.41667	1	0.00995025	>sp|O75683|SURF6_HUMAN Surfeit locus protein 6 OS=Homo sapiens GN=SURF6 PE=1 SV=3
0	0	0	0	0.415037	0	0.373901	0.686745	1	0	0.138346	0.333333	2	0	>sp|O75688|PPM1B_HUMAN Protein phosphatase 1B OS=Homo sapiens GN=PPM1B PE=1 SV=1
3.41504	2.70044	0	3.64386	2.16993	1.66297	0.521368	0.833254	2	3	-0.807433	32.3333	2	0	>sp|O75694|NU155_HUMAN Nuclear pore complex protein Nup155 OS=Homo sapiens GN=NUP155 PE=1 SV=1
1.32193	0	1.11548	0	1.05889	0	0.000128717	0.169279	3	0	1.16543	3.75	1	0	>sp|O75695|XRP2_HUMAN Protein XRP2 OS=Homo sapiens GN=RP2 PE=1 SV=4
0	0	0	0	0	0	NaN	NaN	0	0	0	0	1	0	>sp|O75717|WDHD1_HUMAN WD repeat and HMG-box DNA-binding protein 1 OS=Homo sapiens GN=WDHD1 PE=1 SV=1
0	0	0	0	0	3.27302	0.373901	0.686745	0	1	-1.09101	8.66667	1	0	>sp|O75746|CMC1_HUMAN Calcium-binding mitochondrial carrier protein Aralar1 OS=Homo sapiens GN=SLC25A12 PE=1 SV=2
0	0	0	0	0	0	NaN	NaN	0	0	0	0	2	0	>sp|O75771|RA51D_HUMAN DNA repair protein RAD51 homolog 4 OS=Homo sapiens GN=RAD51D PE=1 SV=1
0	0	0	0	0	2.34577	0.373901	0.686745	0	1	-0.781925	4.08333	1	0	>sp|O75792|RNH2A_HUMAN Ribonuclease H2 subunit A OS=Homo sapiens GN=RNASEH2A PE=1 SV=2
0	0	0	0.736966	0	0	0.373901	0.686745	0	1	-0.245655	0.666667	2	0	>sp|O75794|CD123_HUMAN Cell division cycle protein 123 homolog OS=Homo sapiens GN=CDC123 PE=1 SV=1
1.8413	1.27302	0.662965	1	2	0	0.263615	0.686745	3	2	0.74375	8.58333	1	0	>sp|O75821|EIF3G_HUMAN Eukaryotic translation initiation factor 3 subunit G OS=Homo sapiens GN=EIF3G PE=1 SV=2
1.77259	0.584963	0	0	1.62449	0	0.193454	0.686745	2	1	0.937373	5	1	0	>sp|O75822|EIF3J_HUMAN Eukaryotic translation initiation factor 3 subunit J OS=Homo sapiens GN=EIF3J PE=1 SV=2
0	0	0	0	0	0.5025	0.373901	0.686745	0	1	-0.1675	0.416667	1	0	>sp|O75828|CBR3_HUMAN Carbonyl reductase [NADPH] 3 OS=Homo sapiens GN=CBR3 PE=1 SV=3
1.87447	0.938599	1.11548	2.34577	0	1.27302	0.491239	0.81156	2	3	-0.522482	10.25	1	0	>sp|O75843|AP1G2_HUMAN AP-1 complex subunit gamma-like 2 OS=Homo sapiens GN=AP1G2 PE=1 SV=1
0	0	2.70044	1.77259	0	0	0.788195	0.946645	1	1	0.309283	7.91667	1	0	>sp|O75844|FACE1_HUMAN CAAX prenyl protease 1 homolog OS=Homo sapiens GN=ZMPSTE24 PE=1 SV=2
1.77259	0	1.11548	0	1.62449	0	0.00164178	0.686745	3	0	1.50419	5.66667	1	0	>sp|O75874|IDHC_HUMAN Isocitrate dehydrogenase [NADP] cytoplasmic OS=Homo sapiens GN=IDH1 PE=1 SV=2
0	0	0	1.27302	0	1.27302	0.116117	0.686745	0	2	-0.848679	2.83333	1	0	>sp|O75880|SCO1_HUMAN Protein SCO1 homolog, mitochondrial OS=Homo sapiens GN=SCO1 PE=1 SV=1
0	0	0.5025	0	0	0	0.373901	0.686745	1	0	0.1675	0.416667	1	0	>sp|O75915|PRAF3_HUMAN PRA1 family protein 3 OS=Homo sapiens GN=ARL6IP5 PE=1 SV=1
0	0	1.27302	0	0	0	0.373901	0.686745	1	0	0.424339	1.41667	1	0	>sp|O75925|PIAS1_HUMAN E3 SUMO-protein ligase PIAS1 OS=Homo sapiens GN=PIAS1 PE=1 SV=2
0	0	0	0	0	0	NaN	NaN	0	0	0	0	2	0	>sp|O75928|PIAS2_HUMAN E3 SUMO-protein ligase PIAS2 OS=Homo sapiens GN=PIAS2 PE=1 SV=3
0.874469	0	0	0	0	1.77259	0.673116	0.907464	1	1	-0.299373	3.25	1	0	>sp|O75934|SPF27_HUMAN Pre-mRNA-splicing factor SPF27 OS=Homo sapiens GN=BCAS2 PE=1 SV=1
0	0	0	0	0	0.662965	0.373901	0.686745	0	1	-0.220988	0.583333	1	0.00882786	>sp|O75937|DNJC8_HUMAN DnaJ homolog subfamily C member 8 OS=Homo sapiens GN=DNAJC8 PE=1 SV=2
0.938599	1.73697	2.52356	1.45943	3.08746	1.41504	0.377223	0.688898	3	3	0.646063	18.9167	1	0	>sp|O75955|FLOT1_HUMAN Flotillin-1 OS=Homo sapiens GN=FLOT1 PE=1 SV=3
0	0	0	0	1.05889	0	0.373901	0.686745	1	0	0.352965	1.08333	2	0	>sp|O75964|ATP5L_HUMAN ATP synthase subunit g, mitochondrial OS=Homo sapiens GN=ATP5L PE=1 SV=3
0	0	2.16993	0	0	2	0.956844	0.982303	1	1	0.0566417	6.5	1	0	>sp|O76003|GLRX3_HUMAN Glutaredoxin-3 OS=Homo sapiens GN=GLRX3 PE=1 SV=2
0	0	0	0	0	0	NaN	NaN	0	0	0	0	3	0.00233645	>sp|O76009|KT33A_HUMAN Keratin, type I cuticular Ha3-I OS=Homo sapiens GN=KRT33A PE=2 SV=2
0	0	0	0	0	0	NaN	NaN	0	0	0	0	3	0.00234192	>sp|O76011|KRT34_HUMAN Keratin, type I cuticular Ha4 OS=Homo sapiens GN=KRT34 PE=2 SV=2
0	2.45943	0	0	0	0	0.373901	0.686745	0	1	-0.819811	4.5	2	0	>sp|O76013|KRT36_HUMAN Keratin, type I cuticular Ha6 OS=Homo sapiens GN=KRT36 PE=2 SV=1
0	0	1.16993	0	0	1.87447	0.765792	0.940709	1	1	-0.234848	3.91667	2	0	>sp|O76014|KRT37_HUMAN Keratin, type I cuticular Ha7 OS=Homo sapiens GN=KRT37 PE=3 SV=3
0	2.51307	0	0	0	1.70044	0.130697	0.686745	0	2	-1.4045	6.95833	2	0	>sp|O76015|KRT38_HUMAN Keratin, type I cuticular Ha8 OS=Homo sapiens GN=KRT38 PE=1 SV=3
2.8413	0	0.115477	3.40372	2.98489	3.26053	0.876252	0.971039	3	2	-0.240859	31.3333	1	0	>sp|O76031|CLPX_HUMAN ATP-dependent Clp protease ATP-binding subunit clpX-like, mitochondrial OS=Homo sapiens GN=CLPX PE=1 SV=2
0	0	0.662965	1.77259	0	1.27302	0.237373	0.686745	1	2	-0.794214	4.41667	1	0	>sp|O76062|ERG24_HUMAN Delta(14)-sterol reductase OS=Homo sapiens GN=TM7SF2 PE=2 SV=3
0	0	0	0	0	0	NaN	NaN	0	0	0	0	1	0	>sp|O76071|CIAO1_HUMAN Probable cytosolic iron-sulfur protein assembly protein CIAO1 OS=Homo sapiens GN=CIAO1 PE=1 SV=1
0	1.27302	0	0	2	1.77259	0.702863	0.925393	1	2	-0.348536	6.83333	2	0	>sp|O76080|ZFAN5_HUMAN AN1-type zinc finger protein 5 OS=Homo sapiens GN=ZFAND5 PE=1 SV=1
0	0	0	0	0.415037	0	0.373901	0.686745	1	0	0.138346	0.333333	1	0	>sp|O76094|SRP72_HUMAN Signal recognition particle subunit SRP72 OS=Homo sapiens GN=SRP72 PE=1 SV=3
0	0.736966	0	0	0	0	0.373901	0.686745	0	1	-0.245655	0.666667	2	0	>sp|O94766|B3GA3_HUMAN Galactosylgalactosylxylosylprotein 3-beta-glucuronosyltransferase 3 OS=Homo sapiens GN=B3GAT3 PE=1 SV=2
0.807355	0	0	0	0	0	0.373901	0.686745	1	0	0.269118	0.75	1	0	>sp|O94768|ST17B_HUMAN Serine/threonine-protein kinase 17B OS=Homo sapiens GN=STK17B PE=1 SV=1
0	2.54432	2.82443	1.77259	1.54432	3.01495	0.330857	0.686745	2	3	-0.987704	22.3333	1	0	>sp|O94776|MTA2_HUMAN Metastasis-associated protein MTA2 OS=Homo sapiens GN=MTA2 PE=1 SV=1
0.321928	0	0	0	0	0	0.373901	0.686745	1	0	0.107309	0.25	3	0.00296736	>sp|O94805|ACL6B_HUMAN Actin-like protein 6B OS=Homo sapiens GN=ACTL6B PE=1 SV=1
0.874469	0	0	0	2.92283	0	0.21771	0.686745	2	0	1.26577	7.41667	1	0	>sp|O94808|GFPT2_HUMAN Glutamine--fructose-6-phosphate aminotransferase [isomerizing] 2 OS=Homo sapiens GN=GFPT2 PE=1 SV=3
2.02975	2.58496	0	0	0	0	0.874049	0.96954	1	1	-0.185072	8.08333	1	0	>sp|O94822|LTN1_HUMAN E3 ubiquitin-protein ligase listerin OS=Homo sapiens GN=LTN1 PE=1 SV=6
0	3.23522	1.54432	1.5025	3.22239	1.22239	0.741142	0.940709	2	3	-0.397799	21.8333	1	0	>sp|O94826|TOM70_HUMAN Mitochondrial import receptor subunit TOM70 OS=Homo sapiens GN=TOMM70A PE=1 SV=1
0.874469	0	0	0	0	0	0.373901	0.686745	1	0	0.29149	0.833333	1	0	>sp|O94829|IPO13_HUMAN Importin-13 OS=Homo sapiens GN=IPO13 PE=1 SV=3
0	0	0.5025	0.736966	0	0	0.805642	0.946645	1	1	-0.0781551	1.08333	2	0	>sp|O94842|TOX4_HUMAN TOX high mobility group box family member 4 OS=Homo sapiens GN=TOX4 PE=1 SV=1
0	0.736966	0	0	0	0	0.373901	0.686745	0	1	-0.245655	0.666667	2	0.00339559	>sp|O94855|SC24D_HUMAN Protein transport protein Sec24D OS=Homo sapiens GN=SEC24D PE=1 SV=2
3.27302	1.70044	0	3.18322	2.41504	1.27302	0.897454	0.972756	2	3	-0.156208	24.75	1	0	>sp|O94874|UFL1_HUMAN E3 UFM1-protein ligase 1 OS=Homo sapiens GN=UFL1 PE=1 SV=2
1	1.73697	1.73697	2.02975	2.32193	3.11548	0.344531	0.686745	3	3	-0.607765	20.4167	1	0	>sp|O94888|UBXN7_HUMAN UBX domain-containing protein 7 OS=Homo sapiens GN=UBXN7 PE=1 SV=2
0	0	0.5025	0.736966	0	0	0.805642	0.946645	1	1	-0.0781551	1.08333	2	0	>sp|O94900|TOX_HUMAN Thymocyte selection-associated high mobility group box protein TOX OS=Homo sapiens GN=TOX PE=2 SV=3
0.874469	0	0	0	0	0	0.373901	0.686745	1	0	0.29149	0.833333	2	0.00482315	>sp|O94901|SUN1_HUMAN SUN domain-containing protein 1 OS=Homo sapiens GN=SUN1 PE=1 SV=3
0	0	0	0	0	0	NaN	NaN	0	0	0	0	1	0	>sp|O94903|PROSC_HUMAN Proline synthase co-transcribed bacterial homolog protein OS=Homo sapiens GN=PROSC PE=1 SV=1
0	0	1.27302	0.662965	2.52356	1.05889	0.431458	0.754424	2	2	0.691574	7.83333	2	0	>sp|O94905|ERLN2_HUMAN Erlin-2 OS=Homo sapiens GN=ERLIN2 PE=1 SV=1
0	0	1.73697	2.54432	2	0	0.725436	0.930997	2	1	0.397548	10.1667	1	0	>sp|O94906|PRP6_HUMAN Pre-mRNA-processing factor 6 OS=Homo sapiens GN=PRPF6 PE=1 SV=1
2.39232	0	1.54432	0	2.32193	2.56478	0.241822	0.686745	3	1	1.23126	15.0833	1	0	>sp|O94921|CDK14_HUMAN Cyclin-dependent kinase 14 OS=Homo sapiens GN=CDK14 PE=1 SV=3
2.02975	0	1.11548	0	2	0.5025	0.0107813	0.686745	3	1	1.54757	7.66667	1	0	>sp|O94925|GLSK_HUMAN Glutaminase kidney isoform, mitochondrial OS=Homo sapiens GN=GLS PE=1 SV=1
0.807355	0	0	0	2	0	0.182493	0.686745	2	0	0.935785	3.75	1	0	>sp|O94927|HAUS5_HUMAN HAUS augmin-like complex subunit 5 OS=Homo sapiens GN=HAUS5 PE=1 SV=2
0	0	0	0	0	1.27302	0.373901	0.686745	0	1	-0.424339	1.41667	1	0	>sp|O94952|FBX21_HUMAN F-box only protein 21 OS=Homo sapiens GN=FBXO21 PE=2 SV=2
1.32193	0	0.321928	0	0	0	0.24061	0.686745	2	0	0.547952	1.75	2	0	>sp|O94953|KDM4B_HUMAN Lysine-specific demethylase 4B OS=Homo sapiens GN=KDM4B PE=1 SV=4
0	0	0	0	0	0	NaN	NaN	0	0	0	0	1	0.00610376	>sp|O94955|RHBT3_HUMAN Rho-related BTB domain-containing protein 3 OS=Homo sapiens GN=RHOBTB3 PE=1 SV=2
0	0	0	0	0	1.27302	0.373901	0.686745	0	1	-0.424339	1.41667	2	0	>sp|O94973|AP2A2_HUMAN AP-2 complex subunit alpha-2 OS=Homo sapiens GN=AP2A2 PE=1 SV=2
1.8413	2.45943	1.16993	2.02975	0	0	0.624282	0.878706	2	2	-0.492651	11.4167	2	0	>sp|O94979|SC31A_HUMAN Protein transport protein Sec31A OS=Homo sapiens GN=SEC31A PE=1 SV=3
0	0	0	0	0	0.662965	0.373901	0.686745	0	1	-0.220988	0.583333	1	0.003003	>sp|O95057|DIRA1_HUMAN GTP-binding protein Di-Ras1 OS=Homo sapiens GN=DIRAS1 PE=1 SV=1
3.11548	3.06609	2.24793	2.54432	2	1.77259	0.990309	0.996843	3	3	-0.00653149	29.0417	2	0	>sp|O95067|CCNB2_HUMAN G2/mitotic-specific cyclin-B2 OS=Homo sapiens GN=CCNB2 PE=1 SV=1
0.874469	0	0	0.736966	1.62449	1.77259	0.996195	0.999772	2	2	-0.00353171	6	2	0	>sp|O95070|YIF1A_HUMAN Protein YIF1A OS=Homo sapiens GN=YIF1A PE=1 SV=2
5.17991	5.70621	4.30986	5.09452	5.59743	5.756	0.322954	0.686745	3	3	-0.489843	238.917	1	0	>sp|O95071|UBR5_HUMAN E3 ubiquitin-protein ligase UBR5 OS=Homo sapiens GN=UBR5 PE=1 SV=2
1.32193	2.58496	0	1.27302	1.62449	1.77259	0.227625	0.686745	2	3	-0.894717	12.4167	1	0	>sp|O95104|SFR15_HUMAN Splicing factor, arginine/serine-rich 15 OS=Homo sapiens GN=SCAF4 PE=1 SV=3
0	0	0	0	0	0	NaN	NaN	0	0	0	0	2	0.00475436	>sp|O95139|NDUB6_HUMAN NADH dehydrogenase [ubiquinone] 1 beta subcomplex subunit 6 OS=Homo sapiens GN=NDUFB6 PE=1 SV=3
0.807355	0	3.41504	2.87447	2	0	0.411756	0.732142	3	1	1.11597	19.75	1	0	>sp|O95140|MFN2_HUMAN Mitofusin-2 OS=Homo sapiens GN=MFN2 PE=1 SV=3
2.54432	3.23522	2.05889	2.54432	3.6677	3.68182	0.531498	0.841644	3	3	-0.396815	44.7917	1	0	>sp|O95155|UBE4B_HUMAN Ubiquitin conjugation factor E4 B OS=Homo sapiens GN=UBE4B PE=1 SV=1
0	0	0.5025	0	0	0	0.373901	0.686745	1	0	0.1675	0.416667	1	0.00132363	>sp|O95158|NXPH4_HUMAN Neurexophilin-4 OS=Homo sapiens GN=NXPH4 PE=2 SV=3
0.874469	0	1.11548	0	0	0	0.121918	0.686745	2	0	0.663315	2	1	0	>sp|O95159|ZFPL1_HUMAN Zinc finger protein-like 1 OS=Homo sapiens GN=ZFPL1 PE=1 SV=2
0	0	0	0	0	0	NaN	NaN	0	0	0	0	1	0	>sp|O95163|ELP1_HUMAN Elongator complex protein 1 OS=Homo sapiens GN=IKBKAP PE=1 SV=3
3.35755	3.1565	4.08037	3.9386	2.68182	3.20945	0.903307	0.972756	3	3	-0.0616026	61.0833	1	0	>sp|O95202|LETM1_HUMAN LETM1 and EF-hand domain-containing protein 1, mitochondrial OS=Homo sapiens GN=LETM1 PE=1 SV=1
0	1.27302	0	0	1.05889	0.662965	0.596891	0.874881	1	2	-0.292363	3.08333	1	0	>sp|O95229|ZWINT_HUMAN ZW10 interactor OS=Homo sapiens GN=ZWINT PE=1 SV=2
0	0	0.5025	0	0	0.5025	1	1	1	1	0	0.833333	2	0	>sp|O95232|LC7L3_HUMAN Luc7-like protein 3 OS=Homo sapiens GN=LUC7L3 PE=1 SV=2
0.874469	1.73697	1.11548	0	0	0	0.906035	0.972756	2	1	0.0843269	4.33333	1	0	>sp|O95236|APOL3_HUMAN Apolipoprotein L3 OS=Homo sapiens GN=APOL3 PE=1 SV=3
3.01495	0	1.73697	2.54432	2.92283	2.75489	0.462807	0.783496	3	2	0.791847	26.5833	2	0	>sp|O95249|GOSR1_HUMAN Golgi SNAP receptor complex member 1 OS=Homo sapiens GN=GOSR1 PE=1 SV=1
0	0	0	0.736966	0	0	0.373901	0.686745	0	1	-0.245655	0.666667	2	0.00177148	>sp|O95251|KAT7_HUMAN Histone acetyltransferase KAT7 OS=Homo sapiens GN=KAT7 PE=1 SV=1
0	0	0.5025	0	0	0	0.373901	0.686745	1	0	0.1675	0.416667	4	0	>sp|O95258|UCP5_HUMAN Brain mitochondrial carrier protein 1 OS=Homo sapiens GN=SLC25A14 PE=2 SV=1
0	0	0	0	0	0	NaN	NaN	0	0	0	0	1	0	>sp|O95273|CCDB1_HUMAN Cyclin-D1-binding protein 1 OS=Homo sapiens GN=CCNDBP1 PE=1 SV=2
1.11548	0	0.5025	0	1.62449	0	0.0290451	0.686745	3	0	1.08082	3.66667	1	0	>sp|O95292|VAPB_HUMAN Vesicle-associated membrane protein-associated protein B/C OS=Homo sapiens GN=VAPB PE=1 SV=3
0	1.05889	0	1.8413	0	1.41504	0.00313273	0.686745	0	3	-1.43841	5.33333	1	0	>sp|O95294|RASL1_HUMAN RasGAP-activating-like protein 1 OS=Homo sapiens GN=RASAL1 PE=1 SV=3
0	0	0	0	1.62449	0	0.373901	0.686745	1	0	0.541497	2.08333	1	0	>sp|O95295|SNAPN_HUMAN SNARE-associated protein Snapin OS=Homo sapiens GN=SNAPIN PE=1 SV=1
0	0	0	0	0	0.662965	0.373901	0.686745	0	1	-0.220988	0.583333	1	0.00112931	>sp|O95297|MPZL1_HUMAN Myelin protein zero-like protein 1 OS=Homo sapiens GN=MPZL1 PE=1 SV=1
0	0.70044	0	0	2.73697	2.02975	0.998444	1	1	2	0.00225951	9.375	2	0	>sp|O95299|NDUAA_HUMAN NADH dehydrogenase [ubiquinone] 1 alpha subcomplex subunit 10, mitochondrial OS=Homo sapiens GN=NDUFA10 PE=1 SV=1
0	0	0	0	0	0	NaN	NaN	0	0	0	0	2	0	>sp|O95319|CELF2_HUMAN CUGBP Elav-like family member 2 OS=Homo sapiens GN=CELF2 PE=1 SV=1
0	0	0	0	0	0	NaN	NaN	0	0	0	0	2	0	>sp|O95336|6PGL_HUMAN 6-phosphogluconolactonase OS=Homo sapiens GN=PGLS PE=1 SV=2
3.14975	2.63421	0	3.70966	2.92283	2	0.539662	0.849661	2	3	-0.757095	34.75	1	0	>sp|O95347|SMC2_HUMAN Structural maintenance of chromosomes protein 2 OS=Homo sapiens GN=SMC2 PE=1 SV=2
0	0	0	0	0	1.77259	0.373901	0.686745	0	1	-0.590863	2.41667	1	0	>sp|O95372|LYPA2_HUMAN Acyl-protein thioesterase 2 OS=Homo sapiens GN=LYPLA2 PE=1 SV=1
0	0	0	0	0	0	NaN	NaN	0	0	0	0	1	0	>sp|O95373|IPO7_HUMAN Importin-7 OS=Homo sapiens GN=IPO7 PE=1 SV=1
0	2.75489	0	0	0	0	0.373901	0.686745	0	1	-0.918296	5.75	1	0	>sp|O95391|SLU7_HUMAN Pre-mRNA-splicing factor SLU7 OS=Homo sapiens GN=SLU7 PE=1 SV=2
0	0.662965	1.11548	0	0	0	0.744877	0.940709	1	1	0.150837	1.75	1	0	>sp|O95396|MOCS3_HUMAN Adenylyltransferase and sulfurtransferase MOCS3 OS=Homo sapiens GN=MOCS3 PE=1 SV=1
0	0	0.5025	0	1.05889	0	0.163983	0.686745	2	0	0.520465	1.5	1	0	>sp|O95400|CD2B2_HUMAN CD2 antigen cytoplasmic tail-binding protein 2 OS=Homo sapiens GN=CD2BP2 PE=1 SV=1
0	0	2.92283	2.02975	0.938599	0	0.607002	0.877334	2	1	0.610561	10.5833	1	0	>sp|O95433|AHSA1_HUMAN Activator of 90 kDa heat shock protein ATPase homolog 1 OS=Homo sapiens GN=AHSA1 PE=1 SV=1
0	0	0	0	0.415037	0	0.373901	0.686745	1	0	0.138346	0.333333	1	0	>sp|O95456|PSMG1_HUMAN Proteasome assembly chaperone 1 OS=Homo sapiens GN=PSMG1 PE=1 SV=1
3.71882	3.49719	0	1.52356	3.93074	3.89077	0.789181	0.946645	2	3	-0.420655	52.4167	1	0	>sp|O95466|FMNL1_HUMAN Formin-like protein 1 OS=Homo sapiens GN=FMNL1 PE=1 SV=3
0	0	1.11548	0	0	0	0.373901	0.686745	1	0	0.371826	1.16667	2	0	>sp|O95476|CNEP1_HUMAN CTD nuclear envelope phosphatase 1 OS=Homo sapiens GN=CTDNEP1 PE=1 SV=2
0	0	0	0	0	0	NaN	NaN	0	0	0	0	1	0	>sp|O95486|SC24A_HUMAN Protein transport protein Sec24A OS=Homo sapiens GN=SEC24A PE=1 SV=2
1.32193	0	0	0	0	0	0.373901	0.686745	1	0	0.440643	1.5	2	0	>sp|O95563|MPC2_HUMAN Mitochondrial pyruvate carrier 2 OS=Homo sapiens GN=MPC2 PE=1 SV=1
0.874469	0	0	0	0	0	0.373901	0.686745	1	0	0.29149	0.833333	2	0	>sp|O95571|ETHE1_HUMAN Persulfide dioxygenase ETHE1, mitochondrial OS=Homo sapiens GN=ETHE1 PE=1 SV=2
4.53398	3.85383	3.58996	0	0	3.52356	0.89958	0.972756	2	2	0.24885	57.1667	1	0	>sp|O95573|ACSL3_HUMAN Long-chain-fatty-acid--CoA ligase 3 OS=Homo sapiens GN=ACSL3 PE=1 SV=3
1.77259	0	0	0	0	0	0.373901	0.686745	1	0	0.590863	2.41667	2	0	>sp|O95619|YETS4_HUMAN YEATS domain-containing protein 4 OS=Homo sapiens GN=YEATS4 PE=1 SV=1
0	0	0	0	0	0	NaN	NaN	0	0	0	0	4	0	>sp|O95626|AN32D_HUMAN Acidic leucine-rich nuclear phosphoprotein 32 family member D OS=Homo sapiens GN=ANP32D PE=2 SV=2
2.82443	2.54432	2.92283	3.51307	2.73697	1.77259	0.688889	0.916399	3	3	0.218082	36	1	0	>sp|O95628|CNOT4_HUMAN CCR4-NOT transcription complex subunit 4 OS=Homo sapiens GN=CNOT4 PE=1 SV=3
0	0	0	0	0	0	NaN	NaN	0	0	0	0	2	0	>sp|O95639|CPSF4_HUMAN Cleavage and polyadenylation specificity factor subunit 4 OS=Homo sapiens GN=CPSF4 PE=1 SV=1
0	0	0	0	2	1.05889	0.698853	0.923323	1	1	0.313702	4.08333	1	0	>sp|O95671|ASML_HUMAN N-acetylserotonin O-methyltransferase-like protein OS=Homo sapiens GN=ASMTL PE=1 SV=3
0	0.736966	0.5025	0	0.415037	0.662965	0.597694	0.874881	2	2	-0.160798	2	1	0	>sp|O95674|CDS2_HUMAN Phosphatidate cytidylyltransferase 2 OS=Homo sapiens GN=CDS2 PE=1 SV=1
0	0	0	0	0	0	NaN	NaN	0	0	0	0	1	0	>sp|O95678|K2C75_HUMAN Keratin, type II cytoskeletal 75 OS=Homo sapiens GN=KRT75 PE=1 SV=2
0.321928	0	0	0	0	0	0.373901	0.686745	1	0	0.107309	0.25	2	0.00945307	>sp|O95684|FR1OP_HUMAN FGFR1 oncogene partner OS=Homo sapiens GN=FGFR1OP PE=1 SV=1
0	0	0	0	0	0	NaN	NaN	0	0	0	0	4	0.00323102	>sp|O95716|RAB3D_HUMAN Ras-related protein Rab-3D OS=Homo sapiens GN=RAB3D PE=1 SV=1
3	3.07325	3.41504	3.68182	3.47032	4.16323	0.379141	0.690512	3	3	-0.344315	62.9167	1	0	>sp|O95721|SNP29_HUMAN Synaptosomal-associated protein 29 OS=Homo sapiens GN=SNAP29 PE=1 SV=1
0	0	0	0	0.415037	0	0.373901	0.686745	1	0	0.138346	0.333333	2	0.00248447	>sp|O95747|OXSR1_HUMAN Serine/threonine-protein kinase OSR1 OS=Homo sapiens GN=OXSR1 PE=1 SV=1
0	0	0	0	0	0	NaN	NaN	0	0	0	0	1	0	>sp|O95749|GGPPS_HUMAN Geranylgeranyl pyrophosphate synthase OS=Homo sapiens GN=GGPS1 PE=1 SV=1
0	0	0.5025	0	0.415037	1.27302	0.80605	0.946645	2	1	-0.118494	2.16667	1	0	>sp|O95755|RAB36_HUMAN Ras-related protein Rab-36 OS=Homo sapiens GN=RAB36 PE=2 SV=2
0	2.08746	0.5025	0	0.415037	0	0.613435	0.878706	2	1	-0.389975	4	2	0	>sp|O95757|HS74L_HUMAN Heat shock 70 kDa protein 4L OS=Homo sapiens GN=HSPA4L PE=1 SV=3
0	0	0.5025	0	0.415037	0	0.119718	0.686745	2	0	0.305846	0.75	3	0	>sp|O95758|PTBP3_HUMAN Polypyrimidine tract-binding protein 3 OS=Homo sapiens GN=PTBP3 PE=1 SV=2
0	0	0	0	0	1.27302	0.373901	0.686745	0	1	-0.424339	1.41667	1	0	>sp|O95782|AP2A1_HUMAN AP-2 complex subunit alpha-1 OS=Homo sapiens GN=AP2A1 PE=1 SV=3
0	0	0	0	0	0	NaN	NaN	0	0	0	0	1	0	>sp|O95801|TTC4_HUMAN Tetratricopeptide repeat protein 4 OS=Homo sapiens GN=TTC4 PE=1 SV=3
0	0	0.321928	2.34577	2.32193	3.39232	0.451728	0.773057	2	2	-1.03141	17.8333	1	0	>sp|O95816|BAG2_HUMAN BAG family molecular chaperone regulator 2 OS=Homo sapiens GN=BAG2 PE=1 SV=1
0	0	0	0	0.222392	1.66297	0.438956	0.763208	1	1	-0.480191	2.33333	1	0	>sp|O95831|AIFM1_HUMAN Apoptosis-inducing factor 1, mitochondrial OS=Homo sapiens GN=AIFM1 PE=1 SV=1
0.321928	0.736966	0.5025	0	0.415037	1.27302	0.528607	0.838455	3	2	-0.256839	3.08333	2	0	>sp|O95861|BPNT1_HUMAN 3'(2'),5'-bisphosphate nucleotidase 1 OS=Homo sapiens GN=BPNT1 PE=1 SV=1
1.32193	0	2.36923	2.02975	2.32193	0	0.15466	0.686745	3	1	1.32778	12.75	2	0	>sp|O95870|ABHGA_HUMAN Abhydrolase domain-containing protein 16A OS=Homo sapiens GN=ABHD16A PE=1 SV=3
0.321928	0.736966	0.5025	0	0	0	0.92378	0.972756	2	1	0.0291543	1.33333	1	0	>sp|O95872|GPAN1_HUMAN G patch domain and ankyrin repeat-containing protein 1 OS=Homo sapiens GN=GPANK1 PE=1 SV=1
0	0	0.5025	0	0	0	0.373901	0.686745	1	0	0.1675	0.416667	1	0.00665927	>sp|O95873|CF047_HUMAN Uncharacterized protein C6orf47 OS=Homo sapiens GN=C6orf47 PE=2 SV=2
0	1.27302	2.70044	0	1.05889	1.27302	0.674057	0.907686	2	2	0.404432	9.41667	1	0	>sp|O95900|TRUB2_HUMAN Probable tRNA pseudouridine synthase 2 OS=Homo sapiens GN=TRUB2 PE=1 SV=1
1.32193	1.77259	1.11548	0	2	2.56478	0.968903	0.98902	3	2	0.0333437	13	1	0	>sp|O95926|SYF2_HUMAN Pre-mRNA-splicing factor SYF2 OS=Homo sapiens GN=SYF2 PE=1 SV=1
0.938599	0	2.22239	2.54432	2	2.34577	0.925566	0.972756	3	2	0.0902988	16.5	1	0	>sp|O95983|MBD3_HUMAN Methyl-CpG-binding domain protein 3 OS=Homo sapiens GN=MBD3 PE=1 SV=1
0	0	0.5025	0	1.62449	0	0.213853	0.686745	2	0	0.708997	2.5	1	0	>sp|O95999|BCL10_HUMAN B-cell lymphoma/leukemia 10 OS=Homo sapiens GN=BCL10 PE=1 SV=1
0	0	0	0	0	2.02975	0.373901	0.686745	0	1	-0.676582	3.08333	1	0	>sp|O96000|NDUBA_HUMAN NADH dehydrogenase [ubiquinone] 1 beta subcomplex subunit 10 OS=Homo sapiens GN=NDUFB10 PE=1 SV=3
2.34577	1.27302	2.05889	2.34577	0.415037	0	0.681556	0.910933	3	2	0.400304	13.0833	1	0	>sp|O96005|CLPT1_HUMAN Cleft lip and palate transmembrane protein 1 OS=Homo sapiens GN=CLPTM1 PE=1 SV=1
0	0	0	0	0	0	NaN	NaN	0	0	0	0	1	0	>sp|O96006|ZBED1_HUMAN Zinc finger BED domain-containing protein 1 OS=Homo sapiens GN=ZBED1 PE=1 SV=1
0	0	2.05889	0	0	0	0.373901	0.686745	1	0	0.686298	3.16667	1	0.001386	>sp|O96008|TOM40_HUMAN Mitochondrial import receptor subunit TOM40 homolog OS=Homo sapiens GN=TOMM40 PE=1 SV=1
0.874469	0.662965	1.27302	0.736966	0	1.96963	0.511856	0.823127	2	3	-0.407356	6.41667	1	0	>sp|O96011|PX11B_HUMAN Peroxisomal membrane protein 11B OS=Homo sapiens GN=PEX11B PE=1 SV=1
0	0	0	0	1.05889	0	0.373901	0.686745	1	0	0.352965	1.08333	1	0	>sp|O96019|ACL6A_HUMAN Actin-like protein 6A OS=Homo sapiens GN=ACTL6A PE=1 SV=1
1.73697	0	1.54432	2.43741	2.24793	0	0.286715	0.686745	3	1	1.0306	12.4167	1	0	>sp|P00338|LDHA_HUMAN L-lactate dehydrogenase A chain OS=Homo sapiens GN=LDHA PE=1 SV=2
0	0	0.874469	0	2	0	0.173219	0.686745	2	0	0.958156	3.83333	1	0	>sp|P00367|DHE3_HUMAN Glutamate dehydrogenase 1, mitochondrial OS=Homo sapiens GN=GLUD1 PE=1 SV=2
0	0	0	0	0	0	NaN	NaN	0	0	0	0	1	0	>sp|P00387|NB5R3_HUMAN NADH-cytochrome b5 reductase 3 OS=Homo sapiens GN=CYB5R3 PE=1 SV=3
0	0	0.662965	0	0	0	0.373901	0.686745	1	0	0.220988	0.583333	1	0	>sp|P00390|GSHR_HUMAN Glutathione reductase, mitochondrial OS=Homo sapiens GN=GSR PE=1 SV=2
0	0	0	0	0	0	NaN	NaN	0	0	0	0	1	0	>sp|P00403|COX2_HUMAN Cytochrome c oxidase subunit 2 OS=Homo sapiens GN=MT-CO2 PE=1 SV=1
0	0	0	0	1.05889	0	0.373901	0.686745	1	0	0.352965	1.08333	1	0	>sp|P00441|SODC_HUMAN Superoxide dismutase [Cu-Zn] OS=Homo sapiens GN=SOD1 PE=1 SV=2
0.321928	0	0	0	0	0	0.373901	0.686745	1	0	0.107309	0.25	1	0	>sp|P00491|PNPH_HUMAN Purine nucleoside phosphorylase OS=Homo sapiens GN=PNP PE=1 SV=2
0	0	1.73697	0	0	0	0.373901	0.686745	1	0	0.578989	2.33333	1	0	>sp|P00492|HPRT_HUMAN Hypoxanthine-guanine phosphoribosyltransferase OS=Homo sapiens GN=HPRT1 PE=1 SV=2
0	0	0	0	1.05889	0	0.373901	0.686745	1	0	0.352965	1.08333	1	0	>sp|P00505|AATM_HUMAN Aspartate aminotransferase, mitochondrial OS=Homo sapiens GN=GOT2 PE=1 SV=3
0	0	1.11548	0	3.08746	0	0.195588	0.686745	2	0	1.40098	8.66667	1	0	>sp|P00558|PGK1_HUMAN Phosphoglycerate kinase 1 OS=Homo sapiens GN=PGK1 PE=1 SV=3
0	0	0	0	0	0	NaN	NaN	0	0	0	0	3	0	>sp|P00738|HPT_HUMAN Haptoglobin OS=Homo sapiens GN=HP PE=1 SV=1
0	0	0	0	0	0	NaN	NaN	0	0	0	0	3	0.004329	>sp|P00739|HPTR_HUMAN Haptoglobin-related protein OS=Homo sapiens GN=HPR PE=2 SV=2
0	0	0	0	0	0	NaN	NaN	0	0	0	0	2	0	>sp|P00813|ADA_HUMAN Adenosine deaminase OS=Homo sapiens GN=ADA PE=1 SV=3
0.874469	0	1.77259	1.45943	0	0	0.60493	0.876166	2	1	0.395876	5	2	0	>sp|P01008|ANT3_HUMAN Antithrombin-III OS=Homo sapiens GN=SERPINC1 PE=1 SV=1
1.77259	1.27302	0	0	0	0	0.830163	0.958172	1	1	0.166524	3.83333	3	0	>sp|P01036|CYTS_HUMAN Cystatin-S OS=Homo sapiens GN=CST4 PE=1 SV=3
1.77259	2.58496	0	0	0	0	0.808285	0.946645	1	1	-0.270791	7.41667	1	0	>sp|P01037|CYTN_HUMAN Cystatin-SN OS=Homo sapiens GN=CST1 PE=1 SV=3
0	1.36923	0	1	0	0	0.125686	0.686745	0	2	-0.789745	2.58333	1	0	>sp|P01040|CYTA_HUMAN Cystatin-A OS=Homo sapiens GN=CSTA PE=1 SV=1
0	0	1.11548	0	0	0	0.373901	0.686745	1	0	0.371826	1.16667	2	0.00345224	>sp|P01241|SOMA_HUMAN Somatotropin OS=Homo sapiens GN=GH1 PE=1 SV=2
0	0	1.11548	0	0	0	0.373901	0.686745	1	0	0.371826	1.16667	2	0.00345622	>sp|P01242|SOM2_HUMAN Growth hormone variant OS=Homo sapiens GN=GH2 PE=1 SV=3
0	0	0	0	0	0	NaN	NaN	0	0	0	0	2	0	>sp|P01591|IGJ_HUMAN Immunoglobulin J chain OS=Homo sapiens GN=JCHAIN PE=1 SV=4
0	0	0	0	0	0	NaN	NaN	0	0	0	0	2	0	>sp|P01620|KV302_HUMAN Ig kappa chain V-III region SIE OS=Homo sapiens PE=1 SV=1
0	0	0	0	0	0	NaN	NaN	0	0	0	0	4	0	>sp|P01622|KV304_HUMAN Ig kappa chain V-III region Ti OS=Homo sapiens PE=1 SV=1
0	0	0	0	0	0	NaN	NaN	0	0	0	0	2	0	>sp|P01623|KV305_HUMAN Ig kappa chain V-III region WOL OS=Homo sapiens PE=1 SV=1
0.321928	0	0	0	0	0	0.373901	0.686745	1	0	0.107309	0.25	2	0.00665004	>sp|P01702|LV104_HUMAN Ig lambda chain V-I region NIG-64 OS=Homo sapiens PE=1 SV=1
0	0	0	0	0	0	NaN	NaN	0	0	0	0	1	0	>sp|P01833|PIGR_HUMAN Polymeric immunoglobulin receptor OS=Homo sapiens GN=PIGR PE=1 SV=4
0	1.27302	0	1.5025	0	2.36923	0.00680261	0.686745	0	3	-1.71492	7.41667	2	0	>sp|P01834|IGKC_HUMAN Ig kappa chain C region OS=Homo sapiens GN=IGKC PE=1 SV=1
0	2.05889	0	2.34577	0	0	0.117801	0.686745	0	2	-1.46822	7.25	2	0	>sp|P01857|IGHG1_HUMAN Ig gamma-1 chain C region OS=Homo sapiens GN=IGHG1 PE=1 SV=1
4.16658	3.78136	1.77259	0	3.72792	3.22882	0.55866	0.853691	3	2	0.885638	52.75	2	0	>sp|P01871|IGHM_HUMAN Ig mu chain C region OS=Homo sapiens GN=IGHM PE=1 SV=3
0	3.82018	0	0	0	0	0.373901	0.686745	0	1	-1.27339	13.125	1	0	>sp|P01876|IGHA1_HUMAN Ig alpha-1 chain C region OS=Homo sapiens GN=IGHA1 PE=1 SV=2
0	2.92283	0	1.5025	0	0	0.155369	0.686745	0	2	-1.47511	8.41667	2	0	>sp|P01877|IGHA2_HUMAN Ig alpha-2 chain C region OS=Homo sapiens GN=IGHA2 PE=1 SV=3
0.321928	1.27302	0	0	0	1.27302	0.165555	0.686745	1	2	-0.74137	3.08333	2	0	>sp|P01880|IGHD_HUMAN Ig delta chain C region OS=Homo sapiens GN=IGHD PE=1 SV=2
0	0	0	0.115477	2.32193	0	0.396316	0.713613	1	1	0.735484	4.08333	2	0	>sp|P01889|1B07_HUMAN HLA class I histocompatibility antigen, B-7 alpha chain OS=Homo sapiens GN=HLA-B PE=1 SV=3
0	1.90689	0	0	0	0.807355	0.176932	0.686745	0	2	-0.904749	3.5	1	0	>sp|P01891|1A68_HUMAN HLA class I histocompatibility antigen, A-68 alpha chain OS=Homo sapiens GN=HLA-A PE=1 SV=4
0	2.41504	0	0	0	0.807355	0.204764	0.686745	0	2	-1.07413	5.08333	2	0	>sp|P01892|1A02_HUMAN HLA class I histocompatibility antigen, A-2 alpha chain OS=Homo sapiens GN=HLA-A PE=1 SV=1
0	0.222392	0	0	2.32193	1.41504	0.810307	0.947565	1	2	0.228166	5.83333	2	0	>sp|P01893|HLAH_HUMAN Putative HLA class I histocompatibility antigen, alpha chain H OS=Homo sapiens GN=HLA-H PE=5 SV=3
0	0.736966	0	0	0	0	0.373901	0.686745	0	1	-0.245655	0.666667	2	0	>sp|P01903|DRA_HUMAN HLA class II histocompatibility antigen, DR alpha chain OS=Homo sapiens GN=HLA-DRA PE=1 SV=1
0	0	0.5025	0	0.415037	0	0.119718	0.686745	2	0	0.305846	0.75	2	0	>sp|P01909|DQA1_HUMAN HLA class II histocompatibility antigen, DQ alpha 1 chain OS=Homo sapiens GN=HLA-DQA1 PE=1 SV=1
0.874469	0	0.321928	1.27302	2.32193	0	0.364297	0.686745	3	1	0.748436	6.5	2	0	>sp|P01911|2B1F_HUMAN HLA class II histocompatibility antigen, DRB1-15 beta chain OS=Homo sapiens GN=HLA-DRB1 PE=1 SV=2
1.32193	0	0	1.27302	2.32193	0	0.376525	0.688104	2	1	0.790279	6.91667	2	0	>sp|P01912|2B13_HUMAN HLA class II histocompatibility antigen, DRB1-3 chain OS=Homo sapiens GN=HLA-DRB1 PE=1 SV=2
0	0	2.05889	0	1.05889	2.02975	0.707762	0.927629	2	1	0.36268	7.33333	3	0	>sp|P01920|DQB1_HUMAN HLA class II histocompatibility antigen, DQ beta 1 chain OS=Homo sapiens GN=HLA-DQB1 PE=1 SV=2
0	1.27302	0	0	0	0	0.373901	0.686745	0	1	-0.424339	1.41667	3	0	>sp|P02042|HBD_HUMAN Hemoglobin subunit delta OS=Homo sapiens GN=HBD PE=1 SV=2
0	0	0	0	0	0	NaN	NaN	0	0	0	0	1	0	>sp|P02452|CO1A1_HUMAN Collagen alpha-1(I) chain OS=Homo sapiens GN=COL1A1 PE=1 SV=5
0	0	0	6.04257	4.90489	0	0.890849	0.972756	1	1	-0.379229	93.875	2	0	>sp|P02533|K1C14_HUMAN Keratin, type I cytoskeletal 14 OS=Homo sapiens GN=KRT14 PE=1 SV=4
0	0	0	5.93271	0	0	0.373901	0.686745	0	1	-1.97757	60.0833	2	0	>sp|P02538|K2C6A_HUMAN Keratin, type II cytoskeletal 6A OS=Homo sapiens GN=KRT6A PE=1 SV=3
0.222392	3.53398	2.34577	3.25424	2.82443	4.33985	0.0911588	0.686745	3	3	-1.91182	48.7083	1	0	>sp|P02545|LMNA_HUMAN Prelamin-A/C OS=Homo sapiens GN=LMNA PE=1 SV=1
0	0	0	0	0	0	NaN	NaN	0	0	0	0	1	0	>sp|P02647|APOA1_HUMAN Apolipoprotein A-I OS=Homo sapiens GN=APOA1 PE=1 SV=1
3.5025	4.10852	0	0	0	0	0.916032	0.972756	1	1	-0.202008	26.5833	2	0	>sp|P02768|ALBU_HUMAN Serum albumin OS=Homo sapiens GN=ALB PE=1 SV=2
0.906891	2.24793	0	1.68182	3.6677	0.584963	0.987589	0.996124	2	3	0.0199598	19.0417	2	0	>sp|P02786|TFR1_HUMAN Transferrin receptor protein 1 OS=Homo sapiens GN=TFRC PE=1 SV=2
0	0	0	0	0	0	NaN	NaN	0	0	0	0	2	0	>sp|P02788|TRFL_HUMAN Lactotransferrin OS=Homo sapiens GN=LTF PE=1 SV=6
0	0	1.11548	1.77259	0	0	0.76939	0.940709	1	1	-0.219037	3.58333	1	0	>sp|P03886|NU1M_HUMAN NADH-ubiquinone oxidoreductase chain 1 OS=Homo sapiens GN=MT-ND1 PE=1 SV=1
0	0	0	0	0	0	NaN	NaN	0	0	0	0	2	0	>sp|P03989|1B27_HUMAN HLA class I histocompatibility antigen, B-27 alpha chain OS=Homo sapiens GN=HLA-B PE=1 SV=2
0	0	0	0.807355	0.415037	0	0.687896	0.915646	1	1	-0.130772	1.08333	1	0	>sp|P04040|CATA_HUMAN Catalase OS=Homo sapiens GN=CAT PE=1 SV=3
0.807355	0	0	0	2	2.02975	0.785754	0.946645	2	1	0.259203	6.83333	1	0	>sp|P04049|RAF1_HUMAN RAF proto-oncogene serine/threonine-protein kinase OS=Homo sapiens GN=RAF1 PE=1 SV=1
0	0	0	0	0	0.662965	0.373901	0.686745	0	1	-0.220988	0.583333	5	0.00930851	>sp|P04066|FUCO_HUMAN Tissue alpha-L-fucosidase OS=Homo sapiens GN=FUCA1 PE=1 SV=4
0	0	0	0	0	0	NaN	NaN	0	0	0	0	2	0	>sp|P04075|ALDOA_HUMAN Fructose-bisphosphate aldolase A OS=Homo sapiens GN=ALDOA PE=1 SV=2
0	0	0	0	1.62449	0	0.373901	0.686745	1	0	0.541497	2.08333	1	0	>sp|P04080|CYTB_HUMAN Cystatin-B OS=Homo sapiens GN=CSTB PE=1 SV=2
0	0	0	1.8413	0	2.02975	0.117058	0.686745	0	2	-1.29035	5.66667	1	0	>sp|P04083|ANXA1_HUMAN Annexin A1 OS=Homo sapiens GN=ANXA1 PE=1 SV=2
0.321928	0	1.73697	1.77259	2	1.27302	0.672416	0.907464	3	2	0.337762	9.41667	1	0	>sp|P04150|GCR_HUMAN Glucocorticoid receptor OS=Homo sapiens GN=NR3C1 PE=1 SV=1
0	0	0	0	2.32193	2.56478	0.947407	0.979423	1	1	-0.0809522	8.91667	2	0	>sp|P04183|KITH_HUMAN Thymidine kinase, cytosolic OS=Homo sapiens GN=TK1 PE=1 SV=2
0	0	0	0	0	0	NaN	NaN	0	0	0	0	4	0	>sp|P04206|KV307_HUMAN Ig kappa chain V-III region GOL OS=Homo sapiens PE=1 SV=1
3.30378	2.5025	2.41504	0	2.75489	1.54432	0.12912	0.686745	3	2	1.47563	25.5417	1	0	>sp|P04220|MUCB_HUMAN Ig mu heavy chain disease protein OS=Homo sapiens PE=1 SV=1
0	0	0	0.736966	0	0	0.373901	0.686745	0	1	-0.245655	0.666667	1	0	>sp|P04222|1C03_HUMAN HLA class I histocompatibility antigen, Cw-3 alpha chain OS=Homo sapiens GN=HLA-C PE=1 SV=2
0	0	0	0	1.62449	0	0.373901	0.686745	1	0	0.541497	2.08333	2	0	>sp|P04229|2B11_HUMAN HLA class II histocompatibility antigen, DRB1-1 beta chain OS=Homo sapiens GN=HLA-DRB1 PE=1 SV=2
1.87447	1.05889	2.9542	2.29768	0	0	0.675594	0.908709	2	2	0.490697	14.4167	1	0	>sp|P04233|HG2A_HUMAN HLA class II histocompatibility antigen gamma chain OS=Homo sapiens GN=CD74 PE=1 SV=3
0	0	0	5.36923	0	0	0.373901	0.686745	0	1	-1.78974	40.3333	1	0	>sp|P04259|K2C6B_HUMAN Keratin, type II cytoskeletal 6B OS=Homo sapiens GN=KRT6B PE=1 SV=5
0	7.9508	0	0	0	0	0.373901	0.686745	0	1	-2.65027	246.417	1	0	>sp|P04264|K2C1_HUMAN Keratin, type II cytoskeletal 1 OS=Homo sapiens GN=KRT1 PE=1 SV=6
0	0	0	0	0	1.77259	0.373901	0.686745	0	1	-0.590863	2.41667	1	0.00477707	>sp|P04279|SEMG1_HUMAN Semenogelin-1 OS=Homo sapiens GN=SEMG1 PE=1 SV=2
0	0	0	0	4.16993	0	0.373901	0.686745	1	0	1.38998	17	1	0	>sp|P04350|TBB4A_HUMAN Tubulin beta-4A chain OS=Homo sapiens GN=TUBB4A PE=1 SV=2
2.02975	2.54432	0	0	3	0	0.535914	0.846104	2	1	0.828476	14.9167	1	0	>sp|P04406|G3P_HUMAN Glyceraldehyde-3-phosphate dehydrogenase OS=Homo sapiens GN=GAPDH PE=1 SV=3
0.321928	0	0	0	0	0	0.373901	0.686745	1	0	0.107309	0.25	2	0	>sp|P04424|ARLY_HUMAN Argininosuccinate lyase OS=Homo sapiens GN=ASL PE=1 SV=4
0	0	0	0	0.736966	0.807355	0.951747	0.980796	1	1	-0.0234631	1.41667	2	0	>sp|P04439|1A03_HUMAN HLA class I histocompatibility antigen, A-3 alpha chain OS=Homo sapiens GN=HLA-A PE=1 SV=2
0.874469	0	0	1.27302	1.62449	0	0.553591	0.853691	2	1	0.408647	4.33333	2	0	>sp|P04440|DPB1_HUMAN HLA class II histocompatibility antigen, DP beta 1 chain OS=Homo sapiens GN=HLA-DPB1 PE=1 SV=1
0.321928	0	0	0	0	1.77259	0.465835	0.783726	1	1	-0.483554	2.66667	2	0.00192123	>sp|P04632|CPNS1_HUMAN Calpain small subunit 1 OS=Homo sapiens GN=CAPNS1 PE=1 SV=1
4.53916	4.70736	0	0	0.415037	0	0.971115	0.990605	2	1	0.0822791	47.7083	1	0	>sp|P04745|AMY1_HUMAN Alpha-amylase 1 OS=Homo sapiens GN=AMY1A PE=1 SV=2
4.3159	4.37504	0	0	0.415037	0	0.955636	0.981639	2	1	0.118634	39	2	0	>sp|P04746|AMYP_HUMAN Pancreatic alpha-amylase OS=Homo sapiens GN=AMY2A PE=1 SV=2
4.16993	4.61961	5.37359	5.15987	4.81805	5.72792	0.464315	0.783726	3	3	-0.381945	195	1	0	>sp|P04792|HSPB1_HUMAN Heat shock protein beta-1 OS=Homo sapiens GN=HSPB1 PE=1 SV=2
0	0.222392	0	0	0	0	0.373901	0.686745	0	1	-0.0741308	0.166667	1	0	>sp|P04818|TYSY_HUMAN Thymidylate synthase OS=Homo sapiens GN=TYMS PE=1 SV=3
1.36923	1.66297	2.71882	1.66297	2.68182	0	0.181264	0.686745	3	2	1.14798	16.9167	1	0	>sp|P04843|RPN1_HUMAN Dolichyl-diphosphooligosaccharide--protein glycosyltransferase subunit 1 OS=Homo sapiens GN=RPN1 PE=1 SV=1
3.37504	3.41504	4.51307	3.49185	3.84967	2.96963	0.167081	0.686745	3	3	0.620419	71.375	1	0	>sp|P04844|RPN2_HUMAN Dolichyl-diphosphooligosaccharide--protein glycosyltransferase subunit 2 OS=Homo sapiens GN=RPN2 PE=1 SV=3
1.62449	0	1.73697	0	0	2.1964	0.695395	0.920961	2	1	0.388353	8	1	0	>sp|P04899|GNAI2_HUMAN Guanine nucleotide-binding protein G(i) subunit alpha-2 OS=Homo sapiens GN=GNAI2 PE=1 SV=3
0	1.36923	2.70044	0	2.70044	0	0.253816	0.686745	2	1	1.34388	12.5833	2	0	>sp|P04908|H2A1B_HUMAN Histone H2A type 1-B/E OS=Homo sapiens GN=HIST1H2AB PE=1 SV=2
0	0	0	0	3.70044	3.35755	0.948583	0.980261	1	1	0.114296	21.25	1	0	>sp|P05023|AT1A1_HUMAN Sodium/potassium-transporting ATPase subunit alpha-1 OS=Homo sapiens GN=ATP1A1 PE=1 SV=1
0	0	0	0	0	0	NaN	NaN	0	0	0	0	1	0	>sp|P05089|ARGI1_HUMAN Arginase-1 OS=Homo sapiens GN=ARG1 PE=1 SV=2
2.34577	0	0	0	0	0	0.373901	0.686745	1	0	0.781925	4.08333	2	0	>sp|P05090|APOD_HUMAN Apolipoprotein D OS=Homo sapiens GN=APOD PE=1 SV=1
0	0	0	1.27302	0	0	0.373901	0.686745	0	1	-0.424339	1.41667	2	0.00373134	>sp|P05091|ALDH2_HUMAN Aldehyde dehydrogenase, mitochondrial OS=Homo sapiens GN=ALDH2 PE=1 SV=2
0	0.662965	0	1.58496	0	0	0.17834	0.686745	0	2	-0.749309	2.58333	1	0	>sp|P05109|S10A8_HUMAN Protein S100-A8 OS=Homo sapiens GN=S100A8 PE=1 SV=1
0	1.77259	0	0	0	1.27302	0.126707	0.686745	0	2	-1.0152	3.83333	2	0	>sp|P05120|PAI2_HUMAN Plasminogen activator inhibitor 2 OS=Homo sapiens GN=SERPINB2 PE=1 SV=2
3.69116	1.16993	6.29462	5.51043	3.62449	4.56478	0.644835	0.889512	3	3	0.788376	169.25	1	0	>sp|P05141|ADT2_HUMAN ADP/ATP translocase 2 OS=Homo sapiens GN=SLC25A5 PE=1 SV=7
0	0	0	0	0	0	NaN	NaN	0	0	0	0	1	0	>sp|P05164|PERM_HUMAN Myeloperoxidase OS=Homo sapiens GN=MPO PE=1 SV=1
1.36923	0	0	0	0	0	0.373901	0.686745	1	0	0.456411	1.58333	1	0	>sp|P05198|IF2A_HUMAN Eukaryotic translation initiation factor 2 subunit 1 OS=Homo sapiens GN=EIF2S1 PE=1 SV=3
0	0	0	0	2.24793	0	0.373901	0.686745	1	0	0.749309	3.75	1	0	>sp|P05362|ICAM1_HUMAN Intercellular adhesion molecule 1 OS=Homo sapiens GN=ICAM1 PE=1 SV=2
0	0	0	0.736966	0	0	0.373901	0.686745	0	1	-0.245655	0.666667	1	0.00981997	>sp|P05386|RLA1_HUMAN 60S acidic ribosomal protein P1 OS=Homo sapiens GN=RPLP1 PE=1 SV=1
0	0	0	0	1.05889	0	0.373901	0.686745	1	0	0.352965	1.08333	1	0	>sp|P05387|RLA2_HUMAN 60S acidic ribosomal protein P2 OS=Homo sapiens GN=RPLP2 PE=1 SV=1
0.938599	0.70044	2.96963	0	0	0	0.303749	0.686745	2	1	1.06926	8.375	2	0	>sp|P05388|RLA0_HUMAN 60S acidic ribosomal protein P0 OS=Homo sapiens GN=RPLP0 PE=1 SV=1
0	0	0	0	2	0	0.373901	0.686745	1	0	0.666667	3	1	0	>sp|P05455|LA_HUMAN Lupus La protein OS=Homo sapiens GN=SSB PE=1 SV=2
0	2.52356	0	0	0	0.807355	0.209925	0.686745	0	2	-1.11031	5.5	2	0	>sp|P05534|1A24_HUMAN HLA class I histocompatibility antigen, A-24 alpha chain OS=Homo sapiens GN=HLA-A PE=1 SV=2
0	0	0	0	0	0	NaN	NaN	0	0	0	0	2	0.00940071	>sp|P05771|KPCB_HUMAN Protein kinase C beta type OS=Homo sapiens GN=PRKCB PE=1 SV=4
0	1.82443	0	0	0	0	0.373901	0.686745	0	1	-0.608143	2.54167	2	0	>sp|P05783|K1C18_HUMAN Keratin, type I cytoskeletal 18 OS=Homo sapiens GN=KRT18 PE=1 SV=2
0	0	3.16993	4.6677	0	0	0.803779	0.946645	1	1	-0.499259	32.4167	2	0	>sp|P05787|K2C8_HUMAN Keratin, type II cytoskeletal 8 OS=Homo sapiens GN=KRT8 PE=1 SV=7
0	0	0	0	0	0	NaN	NaN	0	0	0	0	1	0	>sp|P05976|MYL1_HUMAN Myosin light chain 1/3, skeletal muscle isoform OS=Homo sapiens GN=MYL1 PE=2 SV=3
1.9386	0	0	0	0.415037	1.27302	0.645905	0.890521	2	1	0.360206	4.58333	1	0	>sp|P06239|LCK_HUMAN Tyrosine-protein kinase Lck OS=Homo sapiens GN=LCK PE=1 SV=6
1.11548	0	1.8413	0	0.415037	1.77259	0.50027	0.818306	3	1	0.533076	6.5	1	0	>sp|P06241|FYN_HUMAN Tyrosine-protein kinase Fyn OS=Homo sapiens GN=FYN PE=1 SV=3
0.321928	0	0	0	0	0	0.373901	0.686745	1	0	0.107309	0.25	2	0.00664452	>sp|P06316|LV107_HUMAN Ig lambda chain V-I region BL2 OS=Homo sapiens PE=2 SV=1
2.89077	1.27302	0	1.77259	0	0	0.964782	0.986922	1	2	-0.0516124	10.25	1	0	>sp|P06400|RB_HUMAN Retinoblastoma-associated protein OS=Homo sapiens GN=RB1 PE=1 SV=2
3.08746	0	0	0	3.73697	3.23522	0.490701	0.811197	2	1	1.1964	28.25	2	0	>sp|P06493|CDK1_HUMAN Cyclin-dependent kinase 1 OS=Homo sapiens GN=CDK1 PE=1 SV=3
0	0	2.11548	0	2.71882	0	0.122275	0.686745	2	0	1.61143	8.91667	1	0	>sp|P06576|ATPB_HUMAN ATP synthase subunit beta, mitochondrial OS=Homo sapiens GN=ATP5B PE=1 SV=3
0	2.34577	0	2.34577	0.874469	2.52356	0.00207253	0.686745	1	3	-2.11355	13.75	1	0	>sp|P06702|S10A9_HUMAN Protein S100-A9 OS=Homo sapiens GN=S100A9 PE=1 SV=1
0	0	0	0	0	1.27302	0.373901	0.686745	0	1	-0.424339	1.41667	2	0	>sp|P06730|IF4E_HUMAN Eukaryotic translation initiation factor 4E OS=Homo sapiens GN=EIF4E PE=1 SV=2
2.54432	0	2.36923	0	3.42626	0	0.00105106	0.582012	3	0	2.77994	18.75	1	0	>sp|P06733|ENOA_HUMAN Alpha-enolase OS=Homo sapiens GN=ENO1 PE=1 SV=2
0	0	0	0	1.62449	0	0.373901	0.686745	1	0	0.541497	2.08333	3	0	>sp|P06737|PYGL_HUMAN Glycogen phosphorylase, liver form OS=Homo sapiens GN=PYGL PE=1 SV=4
0.874469	1.27302	2.05889	2.02975	2.52356	0	0.403432	0.72112	3	2	0.718053	13.25	2	0	>sp|P06744|G6PI_HUMAN Glucose-6-phosphate isomerase OS=Homo sapiens GN=GPI PE=1 SV=4
0	2.29768	0	0	0	0	0.373901	0.686745	0	1	-0.765894	3.91667	1	0	>sp|P06748|NPM_HUMAN Nucleophosmin OS=Homo sapiens GN=NPM1 PE=1 SV=2
0	0	0	0	0	0	NaN	NaN	0	0	0	0	2	0	>sp|P06753|TPM3_HUMAN Tropomyosin alpha-3 chain OS=Homo sapiens GN=TPM3 PE=1 SV=2
0	0	1.73697	2.54432	3.22239	0	0.557492	0.853691	2	1	0.805012	15.5	2	0	>sp|P06899|H2B1J_HUMAN Histone H2B type 1-J OS=Homo sapiens GN=HIST1H2BJ PE=1 SV=3
0	0	1.54432	0	0	0	0.373901	0.686745	1	0	0.514774	1.91667	1	0	>sp|P07195|LDHB_HUMAN L-lactate dehydrogenase B chain OS=Homo sapiens GN=LDHB PE=1 SV=2
0	0	0	0	1.05889	1.27302	0.903351	0.972756	1	1	-0.0713749	2.5	3	0	>sp|P07196|NFL_HUMAN Neurofilament light polypeptide OS=Homo sapiens GN=NEFL PE=1 SV=3
0	0	0	0	1.05889	2.34577	0.643322	0.888473	1	1	-0.42896	5.16667	2	0.00672269	>sp|P07197|NFM_HUMAN Neurofilament medium polypeptide OS=Homo sapiens GN=NEFM PE=1 SV=3
1.77259	0	2.36923	2.02975	2.92283	0	0.0899361	0.686745	3	1	1.6783	16.25	1	0	>sp|P07237|PDIA1_HUMAN Protein disulfide-isomerase OS=Homo sapiens GN=P4HB PE=1 SV=3
1.32193	2.05889	1.11548	0	0	0	0.882286	0.972507	2	1	0.126171	5.83333	1	0	>sp|P07339|CATD_HUMAN Cathepsin D OS=Homo sapiens GN=CTSD PE=1 SV=1
0	0	0	0	0	2.11548	0.373901	0.686745	0	1	-0.705159	3.33333	2	0	>sp|P07355|ANXA2_HUMAN Annexin A2 OS=Homo sapiens GN=ANXA2 PE=1 SV=2
0	0	0	0	0	0	NaN	NaN	0	0	0	0	1	0	>sp|P07384|CAN1_HUMAN Calpain-1 catalytic subunit OS=Homo sapiens GN=CAPN1 PE=1 SV=1
0	0	6.08304	0	7.04894	0	0.118264	0.686745	2	0	4.37733	198.208	2	0	>sp|P07437|TBB5_HUMAN Tubulin beta chain OS=Homo sapiens GN=TUBB PE=1 SV=2
0	0	0	0	0.415037	0	0.373901	0.686745	1	0	0.138346	0.333333	1	0	>sp|P07476|INVO_HUMAN Involucrin OS=Homo sapiens GN=IVL PE=1 SV=2
0	0	0	0	0	0	NaN	NaN	0	0	0	0	2	0	>sp|P07477|TRY1_HUMAN Trypsin-1 OS=Homo sapiens GN=PRSS1 PE=1 SV=1
0	0	2.79008	0	0	0	0.373901	0.686745	1	0	0.930026	5.91667	2	0	>sp|P07478|TRY2_HUMAN Trypsin-2 OS=Homo sapiens GN=PRSS2 PE=1 SV=1
0	0	0	0	1.05889	0	0.373901	0.686745	1	0	0.352965	1.08333	2	0	>sp|P07602|SAP_HUMAN Prosaposin OS=Homo sapiens GN=PSAP PE=1 SV=2
0	0	0	0	2	0	0.373901	0.686745	1	0	0.666667	3	3	0	>sp|P07737|PROF1_HUMAN Profilin-1 OS=Homo sapiens GN=PFN1 PE=1 SV=2
2.70966	4.28848	0	0	0	0	0.771169	0.940923	1	1	-0.526274	24.0833	1	0	>sp|P07814|SYEP_HUMAN Bifunctional glutamate/proline--tRNA ligase OS=Homo sapiens GN=EPRS PE=1 SV=5
0	0	0.5025	0	0	0	0.373901	0.686745	1	0	0.1675	0.416667	2	0.00299625	>sp|P07858|CATB_HUMAN Cathepsin B OS=Homo sapiens GN=CTSB PE=1 SV=3
0	0	0.5025	0.736966	0	0	0.805642	0.946645	1	1	-0.0781551	1.08333	2	0	>sp|P07864|LDHC_HUMAN L-lactate dehydrogenase C chain OS=Homo sapiens GN=LDHC PE=1 SV=4
0	0	4.60486	0	4.69813	2.27302	0.246097	0.686745	2	1	2.34332	52.125	1	0	>sp|P07900|HS90A_HUMAN Heat shock protein HSP 90-alpha OS=Homo sapiens GN=HSP90AA1 PE=1 SV=5
0	0	0	0	1.90689	0	0.373901	0.686745	1	0	0.63563	2.75	2	0	>sp|P07910|HNRPC_HUMAN Heterogeneous nuclear ribonucleoproteins C1/C2 OS=Homo sapiens GN=HNRNPC PE=1 SV=4
0	0	2.52356	0	2.73697	1.70044	0.319891	0.686745	2	1	1.1867	12.6667	2	0	>sp|P07947|YES_HUMAN Tyrosine-protein kinase Yes OS=Homo sapiens GN=YES1 PE=1 SV=3
0.222392	0	0	1.5025	2.52356	1.77259	0.86553	0.969525	2	2	-0.176378	9.16667	1	0	>sp|P07948|LYN_HUMAN Tyrosine-protein kinase Lyn OS=Homo sapiens GN=LYN PE=1 SV=3
0	0	0	0	2	0	0.373901	0.686745	1	0	0.666667	3	2	0	>sp|P07951|TPM2_HUMAN Tropomyosin beta chain OS=Homo sapiens GN=TPM2 PE=1 SV=1
0.874469	1.27302	0.5025	0.736966	2.32193	0	0.445826	0.76806	3	2	0.562971	7.33333	1	0	>sp|P07954|FUMH_HUMAN Fumarate hydratase, mitochondrial OS=Homo sapiens GN=FH PE=1 SV=3
0	0	2.05889	0	0	0	0.373901	0.686745	1	0	0.686298	3.16667	1	0	>sp|P08047|SP1_HUMAN Transcription factor Sp1 OS=Homo sapiens GN=SP1 PE=1 SV=3
0	1.27302	0	1.77259	1.62449	0	0.564954	0.857016	1	2	-0.473706	5.91667	1	0	>sp|P08133|ANXA6_HUMAN Annexin A6 OS=Homo sapiens GN=ANXA6 PE=1 SV=3
4.04439	3.88264	3.60979	0	3.43741	3.45943	0.371528	0.686745	3	2	1.24984	60.2917	2	0	>sp|P08195|4F2_HUMAN 4F2 cell-surface antigen heavy chain OS=Homo sapiens GN=SLC3A2 PE=1 SV=3
1.32193	0	1.11548	1.27302	1.05889	0	0.161251	0.686745	3	1	0.741094	5.16667	1	0	>sp|P08237|PFKAM_HUMAN ATP-dependent 6-phosphofructokinase, muscle type OS=Homo sapiens GN=PFKM PE=1 SV=2
4.75489	0	2.14296	4.8371	5.33688	4.65583	0.649413	0.892901	3	2	0.913931	120.625	1	0	>sp|P08238|HS90B_HUMAN Heat shock protein HSP 90-beta OS=Homo sapiens GN=HSP90AB1 PE=1 SV=4
0	0.70044	0	1	2.52356	0	0.773704	0.942167	1	2	0.274374	6.375	1	0	>sp|P08240|SRPR_HUMAN Signal recognition particle receptor subunit alpha OS=Homo sapiens GN=SRPR PE=1 SV=2
0	0	0	1.77259	0	0	0.373901	0.686745	0	1	-0.590863	2.41667	1	0	>sp|P08243|ASNS_HUMAN Asparagine synthetase [glutamine-hydrolyzing] OS=Homo sapiens GN=ASNS PE=1 SV=4
0	0	0	0	0	0	NaN	NaN	0	0	0	0	1	0	>sp|P08311|CATG_HUMAN Cathepsin G OS=Homo sapiens GN=CTSG PE=1 SV=2
0	0	2.05889	0	0	0	0.373901	0.686745	1	0	0.686298	3.16667	2	0	>sp|P08397|HEM3_HUMAN Porphobilinogen deaminase OS=Homo sapiens GN=HMBS PE=1 SV=2
0	0	0	0	1.62449	0	0.373901	0.686745	1	0	0.541497	2.08333	2	0	>sp|P08559|ODPA_HUMAN Pyruvate dehydrogenase E1 component subunit alpha, somatic form, mitochondrial OS=Homo sapiens GN=PDHA1 PE=1 SV=3
0	0	0	0	0	0	NaN	NaN	0	0	0	0	1	0	>sp|P08567|PLEK_HUMAN Pleckstrin OS=Homo sapiens GN=PLEK PE=1 SV=3
1.9386	0	3.11548	3.11548	3.08746	2.9542	0.558821	0.853812	3	2	0.690622	32.4167	1	0	>sp|P08574|CY1_HUMAN Cytochrome c1, heme protein, mitochondrial OS=Homo sapiens GN=CYC1 PE=1 SV=3
0	0	0.662965	0	0	0	0.373901	0.686745	1	0	0.220988	0.583333	1	0	>sp|P08579|RU2B_HUMAN U2 small nuclear ribonucleoprotein B'' OS=Homo sapiens GN=SNRPB2 PE=1 SV=1
1.54432	0.222392	1.16993	0	1.05889	1.27302	0.144297	0.686745	3	2	0.759243	5.83333	2	0	>sp|P08631|HCK_HUMAN Tyrosine-protein kinase HCK OS=Homo sapiens GN=HCK PE=1 SV=5
5.18157	4.91488	6.19147	6.03159	2.53398	3.1565	0.964378	0.986875	3	3	-0.0653196	213.667	1	0	>sp|P08670|VIME_HUMAN Vimentin OS=Homo sapiens GN=VIM PE=1 SV=4
0	0	0	0	2.32193	0	0.373901	0.686745	1	0	0.773976	4	1	0	>sp|P08708|RS17_HUMAN 40S ribosomal protein S17 OS=Homo sapiens GN=RPS17 PE=1 SV=2
0	0	0	0	0	0	NaN	NaN	0	0	0	0	2	0	>sp|P08727|K1C19_HUMAN Keratin, type I cytoskeletal 19 OS=Homo sapiens GN=KRT19 PE=1 SV=4
0	0	3.56478	4.58496	0	0	0.869096	0.969525	1	1	-0.340059	33.8333	2	0	>sp|P08729|K2C7_HUMAN Keratin, type II cytoskeletal 7 OS=Homo sapiens GN=KRT7 PE=1 SV=5
0.415037	1.5025	1.58496	0	0	1.87447	0.57065	0.860399	2	2	-0.45899	6.83333	1	0	>sp|P08754|GNAI3_HUMAN Guanine nucleotide-binding protein G(k) subunit alpha OS=Homo sapiens GN=GNAI3 PE=1 SV=3
0	0	0	0	1.45943	0	0.373901	0.686745	1	0	0.486477	1.75	1	0	>sp|P08758|ANXA5_HUMAN Annexin A5 OS=Homo sapiens GN=ANXA5 PE=1 SV=2
0	0	0	5.22882	5.17493	0	0.994506	0.999044	1	1	-0.0179643	71.625	2	0	>sp|P08779|K1C16_HUMAN Keratin, type I cytoskeletal 16 OS=Homo sapiens GN=KRT16 PE=1 SV=4
0	0	0	0	0	0	NaN	NaN	0	0	0	0	2	0	>sp|P08865|RSSA_HUMAN 40S ribosomal protein SA OS=Homo sapiens GN=RPSA PE=1 SV=4
0.938599	0	1.27302	0	0	0	0.125131	0.686745	2	0	0.737206	2.33333	1	0	>sp|P09012|SNRPA_HUMAN U1 small nuclear ribonucleoprotein A OS=Homo sapiens GN=SNRPA PE=1 SV=3
0	0	0	1.27302	0.415037	0	0.556534	0.853691	1	1	-0.285994	1.75	4	0	>sp|P09086|PO2F2_HUMAN POU domain, class 2, transcription factor 2 OS=Homo sapiens GN=POU2F2 PE=1 SV=3
0	0	0.5025	0	2	0	0.237257	0.686745	2	0	0.834167	3.41667	2	0	>sp|P09104|ENOG_HUMAN Gamma-enolase OS=Homo sapiens GN=ENO2 PE=1 SV=3
2.34577	0	0	2.02975	1.05889	1.77259	0.893685	0.972756	2	2	-0.132556	10.6667	2	0	>sp|P09110|THIK_HUMAN 3-ketoacyl-CoA thiolase, peroxisomal OS=Homo sapiens GN=ACAA1 PE=1 SV=2
0	0	0	0	0	5.05166	0.373901	0.686745	0	1	-1.68389	32.1667	1	0	>sp|P09211|GSTP1_HUMAN Glutathione S-transferase P OS=Homo sapiens GN=GSTP1 PE=1 SV=2
0	0	0	0	0	0.662965	0.373901	0.686745	0	1	-0.220988	0.583333	2	0	>sp|P09417|DHPR_HUMAN Dihydropteridine reductase OS=Homo sapiens GN=QDPR PE=1 SV=2
0	0	0	0	0	0	NaN	NaN	0	0	0	0	1	0	>sp|P09429|HMGB1_HUMAN High mobility group protein B1 OS=Homo sapiens GN=HMGB1 PE=1 SV=3
0	0	0	0	0	0.5025	0.373901	0.686745	0	1	-0.1675	0.416667	3	0	>sp|P09471|GNAO_HUMAN Guanine nucleotide-binding protein G(o) subunit alpha OS=Homo sapiens GN=GNAO1 PE=1 SV=4
0	0	0	0	0	0	NaN	NaN	0	0	0	0	2	0	>sp|P09488|GSTM1_HUMAN Glutathione S-transferase Mu 1 OS=Homo sapiens GN=GSTM1 PE=1 SV=3
0	0	0	0	0	0	NaN	NaN	0	0	0	0	3	0	>sp|P09493|TPM1_HUMAN Tropomyosin alpha-1 chain OS=Homo sapiens GN=TPM1 PE=1 SV=2
0	1.27302	0	0	0	1.27302	0.116117	0.686745	0	2	-0.848679	2.83333	2	0	>sp|P09496|CLCA_HUMAN Clathrin light chain A OS=Homo sapiens GN=CLTA PE=1 SV=1
0.874469	0	0	0.736966	0.415037	0	0.628752	0.878706	2	1	0.18418	1.83333	2	0	>sp|P09525|ANXA4_HUMAN Annexin A4 OS=Homo sapiens GN=ANXA4 PE=1 SV=4
2.96963	1.41504	1.90689	1.96963	1.62449	2.73697	0.832666	0.959947	3	3	0.126459	21.9167	1	0	>sp|P09543|CN37_HUMAN 2',3'-cyclic-nucleotide 3'-phosphodiesterase OS=Homo sapiens GN=CNP PE=1 SV=2
0	0	1.73697	1.27302	2	0	0.339214	0.686745	2	1	0.821316	6.75	2	0	>sp|P09622|DLDH_HUMAN Dihydrolipoyl dehydrogenase, mitochondrial OS=Homo sapiens GN=DLD PE=1 SV=2
0	0	0	0	2.41504	0	0.373901	0.686745	1	0	0.805012	4.33333	2	0	>sp|P09651|ROA1_HUMAN Heterogeneous nuclear ribonucleoprotein A1 OS=Homo sapiens GN=HNRNPA1 PE=1 SV=5
0	0	1.11548	0	0	1.87447	0.745411	0.940709	1	1	-0.252997	3.83333	1	0	>sp|P09661|RU2A_HUMAN U2 small nuclear ribonucleoprotein A' OS=Homo sapiens GN=SNRPA1 PE=1 SV=2
0	0	0	0	1.05889	0	0.373901	0.686745	1	0	0.352965	1.08333	1	0	>sp|P09669|COX6C_HUMAN Cytochrome c oxidase subunit 6C OS=Homo sapiens GN=COX6C PE=1 SV=2
1.11548	0	0	0	0.415037	1.77259	0.910555	0.972756	2	1	-0.0806916	3.91667	1	0	>sp|P09769|FGR_HUMAN Tyrosine-protein kinase Fgr OS=Homo sapiens GN=FGR PE=1 SV=2
1.32193	0	1.11548	1.77259	2.52356	0	0.222286	0.686745	3	1	1.06279	9.83333	1	0	>sp|P09874|PARP1_HUMAN Poly [ADP-ribose] polymerase 1 OS=Homo sapiens GN=PARP1 PE=1 SV=4
0	1.77259	0	0	0	0	0.373901	0.686745	0	1	-0.590863	2.41667	1	0	>sp|P09917|LOX5_HUMAN Arachidonate 5-lipoxygenase OS=Homo sapiens GN=ALOX5 PE=1 SV=2
0	0	0	0	0	0	NaN	NaN	0	0	0	0	1	0	>sp|P09960|LKHA4_HUMAN Leukotriene A-4 hydrolase OS=Homo sapiens GN=LTA4H PE=1 SV=2
0	0	0.5025	0	0	0	0.373901	0.686745	1	0	0.1675	0.416667	2	0	>sp|P09972|ALDOC_HUMAN Fructose-bisphosphate aldolase C OS=Homo sapiens GN=ALDOC PE=1 SV=2
0.321928	1.36923	1.16993	1	2.41504	0	0.522726	0.834917	3	2	0.512552	8.41667	1	0	>sp|P0C0S5|H2AZ_HUMAN Histone H2A.Z OS=Homo sapiens GN=H2AFZ PE=1 SV=2
0	1.36923	2.70044	0	2.9542	0	0.245192	0.686745	2	1	1.42847	13.8333	2	0	>sp|P0C0S8|H2A1_HUMAN Histone H2A type 1 OS=Homo sapiens GN=HIST1H2AG PE=1 SV=2
0.321928	0	0	0	0	0	0.373901	0.686745	1	0	0.107309	0.25	2	0	>sp|P0C1Z6|TFPT_HUMAN TCF3 fusion partner OS=Homo sapiens GN=TFPT PE=1 SV=1
1.32193	1.27302	0	0	0	0	0.980015	0.992155	1	1	0.0163032	2.91667	2	0.003003	>sp|P0C221|CC175_HUMAN Coiled-coil domain-containing protein 175 OS=Homo sapiens GN=CCDC175 PE=4 SV=2
0.874469	0	0.5025	0	0	1.77259	0.847491	0.964759	2	1	-0.131873	3.66667	2	0	>sp|P0C7P4|UCRIL_HUMAN Putative cytochrome b-c1 complex subunit Rieske-like protein 1 OS=Homo sapiens GN=UQCRFS1P1 PE=5 SV=1
0	1.77259	0	0.736966	0	0	0.179046	0.686745	0	2	-0.836518	3.08333	2	0	>sp|P0CF74|LAC6_HUMAN Ig lambda-6 chain C region OS=Homo sapiens GN=IGLC6 PE=4 SV=1
0.874469	0	0	0.736966	0	0	0.910092	0.972756	1	1	0.0458345	1.5	2	0	>sp|P0CG04|LAC1_HUMAN Ig lambda-1 chain C regions OS=Homo sapiens GN=IGLC1 PE=1 SV=1
0	2.05889	0	0.736966	0	0	0.196691	0.686745	0	2	-0.931953	3.83333	2	0	>sp|P0CG05|LAC2_HUMAN Ig lambda-2 chain C regions OS=Homo sapiens GN=IGLC2 PE=1 SV=1
0	2.05889	0	0.736966	0	0	0.196691	0.686745	0	2	-0.931953	3.83333	2	0	>sp|P0CG06|LAC3_HUMAN Ig lambda-3 chain C regions OS=Homo sapiens GN=IGLC3 PE=1 SV=1
1.77259	1.73697	1.73697	0	0	0	0.512535	0.823893	2	1	0.590863	7.08333	2	0	>sp|P0CG08|GPHRB_HUMAN Golgi pH regulator B OS=Homo sapiens GN=GPR89B PE=1 SV=1
1.54432	1.05889	3.42626	2.54432	0	0	0.730849	0.93441	2	2	0.45579	17.5833	1	0	>sp|P0CG12|CTF8A_HUMAN Chromosome transmission fidelity protein 8 homolog isoform 2 OS=Homo sapiens GN=CHTF8 PE=1 SV=1
0.321928	0	0.5025	0	0	0.662965	0.849191	0.964759	2	1	0.0538211	1.25	2	0	>sp|P0CG22|DR4L1_HUMAN Putative dehydrogenase/reductase SDR family member 4-like 1 OS=Homo sapiens GN=DHRS4L1 PE=5 SV=1
0	1.11548	0	0	0	0	0.373901	0.686745	0	1	-0.371826	1.16667	1	0	>sp|P0CG38|POTEI_HUMAN POTE ankyrin domain family member I OS=Homo sapiens GN=POTEI PE=3 SV=1
0	0	0	0	1.05889	0	0.373901	0.686745	1	0	0.352965	1.08333	1	0	>sp|P0CG39|POTEJ_HUMAN POTE ankyrin domain family member J OS=Homo sapiens GN=POTEJ PE=3 SV=1
2.34577	0	0	0	0	0	0.373901	0.686745	1	0	0.781925	4.08333	4	0	>sp|P0CG41|CTGE8_HUMAN cTAGE family member 8 OS=Homo sapiens GN=CTAGE8 PE=3 SV=1
7.7131	7.49185	7.40939	6.56986	7.63662	7.93639	0.571964	0.860399	3	3	0.253671	1092.79	2	0	>sp|P0CG47|UBB_HUMAN Polyubiquitin-B OS=Homo sapiens GN=UBB PE=1 SV=1
7.7131	7.49185	7.40939	6.56986	7.63662	7.93639	0.571964	0.860399	3	3	0.253671	1092.79	2	0	>sp|P0CG48|UBC_HUMAN Polyubiquitin-C OS=Homo sapiens GN=UBC PE=1 SV=3
0	1.77259	0	0	1.05889	0	0.747018	0.940709	1	1	-0.237899	3.5	1	0.00294551	>sp|P0CJ92|GOG8H_HUMAN Golgin subfamily A member 8H OS=Homo sapiens GN=GOLGA8H PE=3 SV=1
2.89077	2.9386	2.70044	2.73697	2.52356	0	0.441921	0.764838	3	2	0.813069	29	2	0	>sp|P0DJD0|RGPD1_HUMAN RANBP2-like and GRIP domain-containing protein 1 OS=Homo sapiens GN=RGPD1 PE=2 SV=1
2.89077	2.9386	2.70044	2.73697	2.52356	0	0.441921	0.764838	3	2	0.813069	29	2	0	>sp|P0DJD1|RGPD2_HUMAN RANBP2-like and GRIP domain-containing protein 2 OS=Homo sapiens GN=RGPD2 PE=2 SV=1
0	0	0	0	1.62449	0	0.373901	0.686745	1	0	0.541497	2.08333	2	0	>sp|P0DME0|SETLP_HUMAN Protein SETSIP OS=Homo sapiens GN=SETSIP PE=1 SV=1
0	0	1.11548	0	0	0	0.373901	0.686745	1	0	0.371826	1.16667	2	0.00343446	>sp|P0DML2|CSH1_HUMAN Chorionic somatomammotropin hormone 1 OS=Homo sapiens GN=CSH1 PE=1 SV=1
0	0	1.11548	0	0	0	0.373901	0.686745	1	0	0.371826	1.16667	2	0.00343643	>sp|P0DML3|CSH2_HUMAN Chorionic somatomammotropin hormone 2 OS=Homo sapiens GN=CSH2 PE=1 SV=1
0	0	0	0	2.52356	0	0.373901	0.686745	1	0	0.841187	4.75	3	0	>sp|P0DMR1|HNRC4_HUMAN Heterogeneous nuclear ribonucleoprotein C-like 4 OS=Homo sapiens GN=HNRNPCL4 PE=3 SV=1
0	0.222392	0	0	3.23522	3.61471	0.905729	0.972756	1	2	-0.200629	19.8333	2	0	>sp|P0DMV8|HS71A_HUMAN Heat shock 70 kDa protein 1A OS=Homo sapiens GN=HSPA1A PE=1 SV=1
0	0.222392	0	0	3.23522	3.61471	0.905729	0.972756	1	2	-0.200629	19.8333	2	0	>sp|P0DMV9|HS71B_HUMAN Heat shock 70 kDa protein 1B OS=Homo sapiens GN=HSPA1B PE=1 SV=1
0	0	0	0	0	0	NaN	NaN	0	0	0	0	3	0	>sp|P0DN26|PAL4F_HUMAN Peptidyl-prolyl cis-trans isomerase A-like 4F OS=Homo sapiens GN=PPIAL4F PE=3 SV=1
0	1.05889	0	0	0.736966	0	0.815237	0.948525	1	1	-0.107309	1.75	2	0	>sp|P10314|1A32_HUMAN HLA class I histocompatibility antigen, A-32 alpha chain OS=Homo sapiens GN=HLA-A PE=1 SV=2
0	2.56478	0	0	0	0.807355	0.211817	0.686745	0	2	-1.12405	5.66667	2	0	>sp|P10316|1A69_HUMAN HLA class I histocompatibility antigen, A-69 alpha chain OS=Homo sapiens GN=HLA-A PE=1 SV=2
0	0	0	0	0	0.807355	0.373901	0.686745	0	1	-0.269118	0.75	2	0	>sp|P10319|1B58_HUMAN HLA class I histocompatibility antigen, B-58 alpha chain OS=Homo sapiens GN=HLA-B PE=1 SV=1
0	0.938599	0	0	2.52356	0.807355	0.785557	0.946645	1	2	0.259203	6.41667	2	0	>sp|P10321|1C07_HUMAN HLA class I histocompatibility antigen, Cw-7 alpha chain OS=Homo sapiens GN=HLA-C PE=1 SV=3
1.16993	0	0.874469	0	0	2.56478	0.860266	0.966869	2	1	-0.173463	7	2	0	>sp|P10398|ARAF_HUMAN Serine/threonine-protein kinase A-Raf OS=Homo sapiens GN=ARAF PE=1 SV=2
0	0	0	0	2.41504	0	0.373901	0.686745	1	0	0.805012	4.33333	1	0	>sp|P10412|H14_HUMAN Histone H1.4 OS=Homo sapiens GN=HIST1H1E PE=1 SV=2
0	0	0	0	0	0.5025	0.373901	0.686745	0	1	-0.1675	0.416667	1	0	>sp|P10415|BCL2_HUMAN Apoptosis regulator Bcl-2 OS=Homo sapiens GN=BCL2 PE=1 SV=2
0	0	0	0	1.05889	0	0.373901	0.686745	1	0	0.352965	1.08333	2	0	>sp|P10515|ODP2_HUMAN Dihydrolipoyllysine-residue acetyltransferase component of pyruvate dehydrogenase complex, mitochondrial OS=Homo sapiens GN=DLAT PE=1 SV=3
0	0	0	0	0	0	NaN	NaN	0	0	0	0	1	0	>sp|P10599|THIO_HUMAN Thioredoxin OS=Homo sapiens GN=TXN PE=1 SV=3
0.321928	0.736966	0	0	2.32193	1.27302	0.808158	0.946645	2	2	0.211291	6.33333	2	0	>sp|P10644|KAP0_HUMAN cAMP-dependent protein kinase type I-alpha regulatory subunit OS=Homo sapiens GN=PRKAR1A PE=1 SV=1
0	0	0	0	0	1.27302	0.373901	0.686745	0	1	-0.424339	1.41667	2	0	>sp|P10768|ESTD_HUMAN S-formylglutathione hydrolase OS=Homo sapiens GN=ESD PE=1 SV=2
0	0	0	0	0	0	NaN	NaN	0	0	0	0	1	0	>sp|P10809|CH60_HUMAN 60 kDa heat shock protein, mitochondrial OS=Homo sapiens GN=HSPD1 PE=1 SV=2
2.54432	0.736966	0	0	0.415037	0	0.420237	0.740906	2	1	0.740797	5.83333	2	0	>sp|P10909|CLUS_HUMAN Clusterin OS=Homo sapiens GN=CLU PE=1 SV=1
0	0	0	0.736966	1.80735	2.24793	0.683564	0.911459	1	2	-0.392513	6.91667	1	0	>sp|P11021|GRP78_HUMAN 78 kDa glucose-regulated protein OS=Homo sapiens GN=HSPA5 PE=1 SV=2
0	0	0	0	0	0	NaN	NaN	0	0	0	0	1	0	>sp|P11055|MYH3_HUMAN Myosin-3 OS=Homo sapiens GN=MYH3 PE=1 SV=3
3.78136	5.12412	4.44846	0	4.85383	6.04985	0.75532	0.940709	3	2	0.63656	160.625	2	0	>sp|P11142|HSP7C_HUMAN Heat shock cognate 71 kDa protein OS=Homo sapiens GN=HSPA8 PE=1 SV=1
3.23522	2.41504	0	2.29768	2.73697	2.56478	0.688433	0.915908	2	3	-0.435107	27.25	1	0	>sp|P11166|GTR1_HUMAN Solute carrier family 2, facilitated glucose transporter member 1 OS=Homo sapiens GN=SLC2A1 PE=1 SV=2
0.938599	1.27302	0	0	0	0	0.84288	0.964363	1	1	-0.111473	2.33333	1	0	>sp|P11171|41_HUMAN Protein 4.1 OS=Homo sapiens GN=EPB41 PE=1 SV=4
2.83289	2.52356	0.874469	2.87447	3.73697	0	0.611064	0.878706	3	2	0.682098	30.375	1	0	>sp|P11172|UMPS_HUMAN Uridine 5'-monophosphate synthase OS=Homo sapiens GN=UMPS PE=1 SV=1
0	0	1.8413	0	0.736966	2.45943	0.969663	0.989432	2	1	0.0396121	7.75	1	0	>sp|P11177|ODPB_HUMAN Pyruvate dehydrogenase E1 component subunit beta, mitochondrial OS=Homo sapiens GN=PDHB PE=1 SV=3
0	0	0	0	0	0	NaN	NaN	0	0	0	0	1	0	>sp|P11216|PYGB_HUMAN Glycogen phosphorylase, brain form OS=Homo sapiens GN=PYGB PE=1 SV=5
0	0	0	0	0	0	NaN	NaN	0	0	0	0	1	0	>sp|P11217|PYGM_HUMAN Glycogen phosphorylase, muscle form OS=Homo sapiens GN=PYGM PE=1 SV=6
0	0	0	0	0	1.77259	0.373901	0.686745	0	1	-0.590863	2.41667	1	0	>sp|P11233|RALA_HUMAN Ras-related protein Ral-A OS=Homo sapiens GN=RALA PE=1 SV=1
0	0	0	0	0	1.77259	0.373901	0.686745	0	1	-0.590863	2.41667	2	0	>sp|P11234|RALB_HUMAN Ras-related protein Ral-B OS=Homo sapiens GN=RALB PE=1 SV=1
2.02975	0	2.36923	0	0	2.02975	0.474864	0.793906	2	1	0.789745	10.3333	1	0	>sp|P11274|BCR_HUMAN Breakpoint cluster region protein OS=Homo sapiens GN=BCR PE=1 SV=2
1.8413	0.736966	2.70044	0.807355	2.32193	0	0.00777713	0.686745	3	2	1.77312	13.5	2	0	>sp|P11310|ACADM_HUMAN Medium-chain specific acyl-CoA dehydrogenase, mitochondrial OS=Homo sapiens GN=ACADM PE=1 SV=1
1.11548	0	0	0	0	0	0.373901	0.686745	1	0	0.371826	1.16667	2	0	>sp|P11362|FGFR1_HUMAN Fibroblast growth factor receptor 1 OS=Homo sapiens GN=FGFR1 PE=1 SV=3
0	0	0	0	2	0	0.373901	0.686745	1	0	0.666667	3	1	0	>sp|P11413|G6PD_HUMAN Glucose-6-phosphate 1-dehydrogenase OS=Homo sapiens GN=G6PD PE=1 SV=4
0	0	0	0	2.32193	0	0.373901	0.686745	1	0	0.773976	4	2	0	>sp|P11441|UBL4A_HUMAN Ubiquitin-like protein 4A OS=Homo sapiens GN=UBL4A PE=1 SV=1
0	0	0	0	0	0.5025	0.373901	0.686745	0	1	-0.1675	0.416667	1	0	>sp|P11488|GNAT1_HUMAN Guanine nucleotide-binding protein G(t) subunit alpha-1 OS=Homo sapiens GN=GNAT1 PE=1 SV=5
0	2.58496	0	0	0	0	0.373901	0.686745	0	1	-0.861654	5	2	0.00561798	>sp|P11532|DMD_HUMAN Dystrophin OS=Homo sapiens GN=DMD PE=1 SV=3
3.72792	2.08746	3.22239	2.84967	4.66297	4.08037	0.294427	0.686745	3	3	0.865259	70.2917	1	0	>sp|P11586|C1TC_HUMAN C-1-tetrahydrofolate synthase, cytoplasmic OS=Homo sapiens GN=MTHFD1 PE=1 SV=3
2.73697	0	0	0	0	0	0.373901	0.686745	1	0	0.912322	5.66667	1	0	>sp|P11717|MPRI_HUMAN Cation-independent mannose-6-phosphate receptor OS=Homo sapiens GN=IGF2R PE=1 SV=3
0	0	1.11548	0	0	0	0.373901	0.686745	1	0	0.371826	1.16667	2	0	>sp|P11766|ADHX_HUMAN Alcohol dehydrogenase class-3 OS=Homo sapiens GN=ADH5 PE=1 SV=4
2.5025	0	0	0	1.62449	0	0.133799	0.686745	2	0	1.37566	6.75	3	0	>sp|P11802|CDK4_HUMAN Cyclin-dependent kinase 4 OS=Homo sapiens GN=CDK4 PE=1 SV=2
1.36923	2.24793	3.58996	3.22239	2.9542	2.1964	0.916861	0.972756	3	3	0.0822254	35.0417	2	0	>sp|P11836|CD20_HUMAN B-lymphocyte antigen CD20 OS=Homo sapiens GN=MS4A1 PE=1 SV=1
0	1.77259	1.73697	0	0	0.874469	0.71464	0.929125	1	2	-0.303364	5.58333	1	0	>sp|P11908|PRPS2_HUMAN Ribose-phosphate pyrophosphokinase 2 OS=Homo sapiens GN=PRPS2 PE=1 SV=2
0.321928	0	0	0	0	0	0.373901	0.686745	1	0	0.107309	0.25	1	0	>sp|P11912|CD79A_HUMAN B-cell antigen receptor complex-associated protein alpha chain OS=Homo sapiens GN=CD79A PE=1 SV=2
0	0	0	0	0	3.54946	0.373901	0.686745	0	1	-1.18315	10.7083	2	0	>sp|P11940|PABP1_HUMAN Polyadenylate-binding protein 1 OS=Homo sapiens GN=PABPC1 PE=1 SV=2
0	0	0	0	1.87447	2.58496	0.834816	0.961267	1	1	-0.236831	7.66667	1	0	>sp|P12004|PCNA_HUMAN Proliferating cell nuclear antigen OS=Homo sapiens GN=PCNA PE=1 SV=1
0	0	0	0	0	0	NaN	NaN	0	0	0	0	2	0	>sp|P12035|K2C3_HUMAN Keratin, type II cytoskeletal 3 OS=Homo sapiens GN=KRT3 PE=1 SV=3
0	0	0	0	0	0	NaN	NaN	0	0	0	0	3	0.0037594	>sp|P12036|NFH_HUMAN Neurofilament heavy polypeptide OS=Homo sapiens GN=NEFH PE=1 SV=4
0	0	0	0	0	0	NaN	NaN	0	0	0	0	3	0	>sp|P12081|SYHC_HUMAN Histidine--tRNA ligase, cytoplasmic OS=Homo sapiens GN=HARS PE=1 SV=2
4.58996	0.415037	6.30226	5.36048	2.81592	4.52878	0.568906	0.859363	3	3	1.13461	169.542	1	0	>sp|P12235|ADT1_HUMAN ADP/ATP translocase 1 OS=Homo sapiens GN=SLC25A4 PE=1 SV=4
4.65344	0	6.55331	5.27612	3.29155	4.87036	0.496425	0.815572	3	2	1.45061	191.875	1	0	>sp|P12236|ADT3_HUMAN ADP/ATP translocase 3 OS=Homo sapiens GN=SLC25A6 PE=1 SV=4
0	0	0	0	0	0	NaN	NaN	0	0	0	0	2	0	>sp|P12268|IMDH2_HUMAN Inosine-5'-monophosphate dehydrogenase 2 OS=Homo sapiens GN=IMPDH2 PE=1 SV=2
0	0	0	0	4.1964	0	0.373901	0.686745	1	0	1.3988	17.3333	1	0	>sp|P12270|TPR_HUMAN Nucleoprotein TPR OS=Homo sapiens GN=TPR PE=1 SV=3
1.32193	2.32193	0	0	0	0	0.727198	0.932072	1	1	-0.333333	5.5	1	0	>sp|P12273|PIP_HUMAN Prolactin-inducible protein OS=Homo sapiens GN=PIP PE=1 SV=1
0	0	0	0	1.62449	2.02975	0.883677	0.972507	1	1	-0.135085	5.16667	2	0	>sp|P12694|ODBA_HUMAN 2-oxoisovalerate dehydrogenase subunit alpha, mitochondrial OS=Homo sapiens GN=BCKDHA PE=1 SV=2
0.874469	0	0	0	0	0	0.373901	0.686745	1	0	0.29149	0.833333	1	0	>sp|P12757|SKIL_HUMAN Ski-like protein OS=Homo sapiens GN=SKIL PE=1 SV=2
0	0	0	0	0	0	NaN	NaN	0	0	0	0	2	0	>sp|P12814|ACTN1_HUMAN Alpha-actinin-1 OS=Homo sapiens GN=ACTN1 PE=1 SV=2
0	0	0	0	0	0	NaN	NaN	0	0	0	0	2	0	>sp|P12829|MYL4_HUMAN Myosin light chain 4 OS=Homo sapiens GN=MYL4 PE=1 SV=3
0	0	0	0	0	0	NaN	NaN	0	0	0	0	1	0	>sp|P12882|MYH1_HUMAN Myosin-1 OS=Homo sapiens GN=MYH1 PE=1 SV=3
0	0	0	0	0	0	NaN	NaN	0	0	0	0	1	0	>sp|P12883|MYH7_HUMAN Myosin-7 OS=Homo sapiens GN=MYH7 PE=1 SV=5
0	0.736966	1.11548	0	0	0	0.791134	0.946645	1	1	0.126171	1.83333	2	0	>sp|P12931|SRC_HUMAN Proto-oncogene tyrosine-protein kinase Src OS=Homo sapiens GN=SRC PE=1 SV=3
0	0	0	0	0	0	NaN	NaN	0	0	0	0	1	0.00263852	>sp|P12955|PEPD_HUMAN Xaa-Pro dipeptidase OS=Homo sapiens GN=PEPD PE=1 SV=3
0	1.41504	3.11548	2.30986	0	0	0.87754	0.971648	1	2	-0.203139	13.2917	1	0	>sp|P12956|XRCC6_HUMAN X-ray repair cross-complementing protein 6 OS=Homo sapiens GN=XRCC6 PE=1 SV=2
2.89077	3.33985	4.06967	3.91488	2.11548	0	0.675397	0.908561	3	2	0.607063	48.75	1	0	>sp|P13010|XRCC5_HUMAN X-ray repair cross-complementing protein 5 OS=Homo sapiens GN=XRCC5 PE=1 SV=3
0.321928	0	0	0	0	0	0.373901	0.686745	1	0	0.107309	0.25	1	0.0015873	>sp|P13051|UNG_HUMAN Uracil-DNA glycosylase OS=Homo sapiens GN=UNG PE=1 SV=2
0	0	0	0.736966	1.05889	1.77259	0.481393	0.800535	1	2	-0.483554	4.16667	1	0	>sp|P13473|LAMP2_HUMAN Lysosome-associated membrane glycoprotein 2 OS=Homo sapiens GN=LAMP2 PE=1 SV=2
0	0	0	0	0	0	NaN	NaN	0	0	0	0	1	0	>sp|P13489|RINI_HUMAN Ribonuclease inhibitor OS=Homo sapiens GN=RNH1 PE=1 SV=2
0	0	0	0	0	0	NaN	NaN	0	0	0	0	1	0	>sp|P13533|MYH6_HUMAN Myosin-6 OS=Homo sapiens GN=MYH6 PE=1 SV=5
0	0	0	0	0	0	NaN	NaN	0	0	0	0	1	0	>sp|P13535|MYH8_HUMAN Myosin-8 OS=Homo sapiens GN=MYH8 PE=1 SV=3
0	0	0	0	3.42626	2.60486	0.857942	0.965597	1	1	0.273801	14.8333	2	0	>sp|P13637|AT1A3_HUMAN Sodium/potassium-transporting ATPase subunit alpha-3 OS=Homo sapiens GN=ATP1A3 PE=1 SV=3
0	0	0	0	0	0	NaN	NaN	0	0	0	0	1	0	>sp|P13639|EF2_HUMAN Elongation factor 2 OS=Homo sapiens GN=EEF2 PE=1 SV=4
8.13912	6.51307	5.93369	7.72024	0	0	0.988248	0.996392	2	2	-0.0534994	641.25	2	0	>sp|P13645|K1C10_HUMAN Keratin, type I cytoskeletal 10 OS=Homo sapiens GN=KRT10 PE=1 SV=6
0	0	0	0	0	0	NaN	NaN	0	0	0	0	3	0	>sp|P13646|K1C13_HUMAN Keratin, type I cytoskeletal 13 OS=Homo sapiens GN=KRT13 PE=1 SV=4
0	0	0	5.96963	0	0	0.373901	0.686745	0	1	-1.98988	61.6667	2	0	>sp|P13647|K2C5_HUMAN Keratin, type II cytoskeletal 5 OS=Homo sapiens GN=KRT5 PE=1 SV=3
0	0	0	0	3.22239	0	0.373901	0.686745	1	0	1.07413	8.33333	1	0	>sp|P13667|PDIA4_HUMAN Protein disulfide-isomerase A4 OS=Homo sapiens GN=PDIA4 PE=1 SV=2
0	0	0	0	0	0	NaN	NaN	0	0	0	0	1	0	>sp|P13674|P4HA1_HUMAN Prolyl 4-hydroxylase subunit alpha-1 OS=Homo sapiens GN=P4HA1 PE=1 SV=2
0	0	0	0	0	1.27302	0.373901	0.686745	0	1	-0.424339	1.41667	2	0.0056101	>sp|P13693|TCTP_HUMAN Translationally-controlled tumor protein OS=Homo sapiens GN=TPT1 PE=1 SV=1
0	0.938599	0	0	0	0.807355	0.118359	0.686745	0	2	-0.581985	1.66667	2	0	>sp|P13746|1A11_HUMAN HLA class I histocompatibility antigen, A-11 alpha chain OS=Homo sapiens GN=HLA-A PE=1 SV=1
0	0	1.73697	1.77259	1.05889	0.5025	0.823846	0.954276	2	2	0.17359	6.25	2	0	>sp|P13747|HLAE_HUMAN HLA class I histocompatibility antigen, alpha chain E OS=Homo sapiens GN=HLA-E PE=1 SV=3
0	0	0	0	1.62449	0	0.373901	0.686745	1	0	0.541497	2.08333	2	0	>sp|P13760|2B14_HUMAN HLA class II histocompatibility antigen, DRB1-4 beta chain OS=Homo sapiens GN=HLA-DRB1 PE=1 SV=1
0	0	0	0	1.62449	0	0.373901	0.686745	1	0	0.541497	2.08333	2	0	>sp|P13761|2B17_HUMAN HLA class II histocompatibility antigen, DRB1-7 beta chain OS=Homo sapiens GN=HLA-DRB1 PE=1 SV=1
0	0	0	0	0	0	NaN	NaN	0	0	0	0	1	0	>sp|P13796|PLSL_HUMAN Plastin-2 OS=Homo sapiens GN=LCP1 PE=1 SV=6
0	1.27302	0	0.736966	1.62449	0	0.854094	0.964759	1	2	-0.128498	4.16667	1	0	>sp|P13797|PLST_HUMAN Plastin-3 OS=Homo sapiens GN=PLS3 PE=1 SV=4
0	0	0	0	0.415037	0	0.373901	0.686745	1	0	0.138346	0.333333	2	0	>sp|P13798|ACPH_HUMAN Acylamino-acid-releasing enzyme OS=Homo sapiens GN=APEH PE=1 SV=4
1.27302	0.222392	1.8413	2.43741	0	0	0.880966	0.972269	2	2	0.151508	8.58333	2	0	>sp|P13804|ETFA_HUMAN Electron transfer flavoprotein subunit alpha, mitochondrial OS=Homo sapiens GN=ETFA PE=1 SV=1
0.874469	0	1.11548	0	2	0	0.0177349	0.686745	3	0	1.32998	5	2	0	>sp|P13929|ENOB_HUMAN Beta-enolase OS=Homo sapiens GN=ENO3 PE=1 SV=5
0.874469	0	0	0	0	0	0.373901	0.686745	1	0	0.29149	0.833333	1	0	>sp|P13984|T2FB_HUMAN General transcription factor IIF subunit 2 OS=Homo sapiens GN=GTF2F2 PE=1 SV=2
0	0	0	0	2	0	0.373901	0.686745	1	0	0.666667	3	1	0	>sp|P13995|MTDC_HUMAN Bifunctional methylenetetrahydrofolate dehydrogenase/cyclohydrolase, mitochondrial OS=Homo sapiens GN=MTHFD2 PE=1 SV=2
0	0.736966	1.73697	3.68182	1.1964	0	0.709255	0.927629	2	2	-0.495142	16.125	1	0	>sp|P14136|GFAP_HUMAN Glial fibrillary acidic protein OS=Homo sapiens GN=GFAP PE=1 SV=1
0	0	0	0	1.05889	0	0.373901	0.686745	1	0	0.352965	1.08333	1	0	>sp|P14174|MIF_HUMAN Macrophage migration inhibitory factor OS=Homo sapiens GN=MIF PE=1 SV=4
0	0	0	0	2	0	0.373901	0.686745	1	0	0.666667	3	2	0	>sp|P14314|GLU2B_HUMAN Glucosidase 2 subunit beta OS=Homo sapiens GN=PRKCSH PE=1 SV=2
0	0	0	0	0.415037	0	0.373901	0.686745	1	0	0.138346	0.333333	2	0	>sp|P14317|HCLS1_HUMAN Hematopoietic lineage cell-specific protein OS=Homo sapiens GN=HCLS1 PE=1 SV=3
1.77259	0	0	0	0	0	0.373901	0.686745	1	0	0.590863	2.41667	1	0	>sp|P14324|FPPS_HUMAN Farnesyl pyrophosphate synthase OS=Homo sapiens GN=FDPS PE=1 SV=4
0.321928	0	0	0	0	0	0.373901	0.686745	1	0	0.107309	0.25	1	0	>sp|P14550|AK1A1_HUMAN Alcohol dehydrogenase [NADP(+)] OS=Homo sapiens GN=AKR1A1 PE=1 SV=3
0	0	0	0	0	0	NaN	NaN	0	0	0	0	1	0	>sp|P14618|KPYM_HUMAN Pyruvate kinase PKM OS=Homo sapiens GN=PKM PE=1 SV=4
0	0	1.16993	2.69116	3.96963	0	0.610786	0.878706	2	1	0.81613	21.375	1	0	>sp|P14625|ENPL_HUMAN Endoplasmin OS=Homo sapiens GN=HSP90B1 PE=1 SV=1
0	0	0	0	0.415037	0	0.373901	0.686745	1	0	0.138346	0.333333	2	0	>sp|P14649|MYL6B_HUMAN Myosin light chain 6B OS=Homo sapiens GN=MYL6B PE=1 SV=1
0	0	2.05889	0	0	2.36923	0.925997	0.972756	1	1	-0.103447	7.33333	2	0	>sp|P14678|RSMB_HUMAN Small nuclear ribonucleoprotein-associated proteins B and B' OS=Homo sapiens GN=SNRPB PE=1 SV=2
0	0	0	0	0	1.77259	0.373901	0.686745	0	1	-0.590863	2.41667	1	0	>sp|P14735|IDE_HUMAN Insulin-degrading enzyme OS=Homo sapiens GN=IDE PE=1 SV=4
0	0	0.5025	1.77259	1.05889	0	0.920825	0.972756	2	1	-0.0703985	3.91667	2	0	>sp|P14859|PO2F1_HUMAN POU domain, class 2, transcription factor 1 OS=Homo sapiens GN=POU2F1 PE=1 SV=2
0	0	0	0	0.415037	1.77259	0.49729	0.815572	1	1	-0.452517	2.75	2	0	>sp|P14866|HNRPL_HUMAN Heterogeneous nuclear ribonucleoprotein L OS=Homo sapiens GN=HNRNPL PE=1 SV=2
0	0	0	0	0	0	NaN	NaN	0	0	0	0	1	0	>sp|P14868|SYDC_HUMAN Aspartate--tRNA ligase, cytoplasmic OS=Homo sapiens GN=DARS PE=1 SV=2
0	0	0	0	0	0	NaN	NaN	0	0	0	0	1	0.00911162	>sp|P14921|ETS1_HUMAN Protein C-ets-1 OS=Homo sapiens GN=ETS1 PE=1 SV=1
0	0	0	2.45943	0	0	0.373901	0.686745	0	1	-0.819811	4.5	1	0	>sp|P14923|PLAK_HUMAN Junction plakoglobin OS=Homo sapiens GN=JUP PE=1 SV=3
0	0	0	1	1.05889	2.02975	0.391251	0.706669	1	2	-0.656951	5.16667	1	0	>sp|P15056|BRAF_HUMAN Serine/threonine-protein kinase B-raf OS=Homo sapiens GN=BRAF PE=1 SV=4
0	0	1.73697	0	0	0	0.373901	0.686745	1	0	0.578989	2.33333	1	0	>sp|P15121|ALDR_HUMAN Aldose reductase OS=Homo sapiens GN=AKR1B1 PE=1 SV=3
0	0	0	0	1.05889	0	0.373901	0.686745	1	0	0.352965	1.08333	3	0	>sp|P15153|RAC2_HUMAN Ras-related C3 botulinum toxin substrate 2 OS=Homo sapiens GN=RAC2 PE=1 SV=1
0	0	0	0	0	0	NaN	NaN	0	0	0	0	2	0.00621118	>sp|P15170|ERF3A_HUMAN Eukaryotic peptide chain release factor GTP-binding subunit ERF3A OS=Homo sapiens GN=GSPT1 PE=1 SV=1
0	0	0	0	0	0	NaN	NaN	0	0	0	0	3	0	>sp|P15259|PGAM2_HUMAN Phosphoglycerate mutase 2 OS=Homo sapiens GN=PGAM2 PE=1 SV=3
0	0	1.11548	2.34577	3.56478	0	0.584854	0.869841	2	1	0.778162	16.0833	2	0	>sp|P15311|EZRI_HUMAN Ezrin OS=Homo sapiens GN=EZR PE=1 SV=4
0	0	0	0.736966	0.415037	0	0.722835	0.929125	1	1	-0.107309	1	2	0	>sp|P15313|VATB1_HUMAN V-type proton ATPase subunit B, kidney isoform OS=Homo sapiens GN=ATP6V1B1 PE=1 SV=3
0	0	0	0	0	2.02975	0.373901	0.686745	0	1	-0.676582	3.08333	2	0	>sp|P15374|UCHL3_HUMAN Ubiquitin carboxyl-terminal hydrolase isozyme L3 OS=Homo sapiens GN=UCHL3 PE=1 SV=1
0	0	0	0	0	0	NaN	NaN	0	0	0	0	1	0	>sp|P15391|CD19_HUMAN B-lymphocyte antigen CD19 OS=Homo sapiens GN=CD19 PE=1 SV=6
0	0.736966	1.11548	0	1.05889	0	0.335559	0.686745	2	1	0.479135	2.91667	2	0	>sp|P15498|VAV_HUMAN Proto-oncogene vav OS=Homo sapiens GN=VAV1 PE=1 SV=4
0	0	0	0	2.32193	0	0.373901	0.686745	1	0	0.773976	4	2	0	>sp|P15531|NDKA_HUMAN Nucleoside diphosphate kinase A OS=Homo sapiens GN=NME1 PE=1 SV=1
0	0	1.11548	0	0	1.27302	0.930318	0.972756	1	1	-0.0525138	2.58333	2	0	>sp|P15735|PHKG2_HUMAN Phosphorylase b kinase gamma catalytic chain, liver/testis isoform OS=Homo sapiens GN=PHKG2 PE=1 SV=1
0	0	0	0	2.32193	0	0.373901	0.686745	1	0	0.773976	4	2	0	>sp|P15814|IGLL1_HUMAN Immunoglobulin lambda-like polypeptide 1 OS=Homo sapiens GN=IGLL1 PE=1 SV=1
0	0	0.662965	0	0	0	0.373901	0.686745	1	0	0.220988	0.583333	2	0	>sp|P15880|RS2_HUMAN 40S ribosomal protein S2 OS=Homo sapiens GN=RPS2 PE=1 SV=2
0.874469	0	0	1.27302	0	0	0.809097	0.946645	1	1	-0.13285	2.25	3	0.00176367	>sp|P15884|ITF2_HUMAN Transcription factor 4 OS=Homo sapiens GN=TCF4 PE=1 SV=3
3.01495	3.23522	2.36923	2.02975	2.32193	1.77259	0.680763	0.910508	3	3	0.222853	29.1667	1	0	>sp|P15923|TFE2_HUMAN Transcription factor E2-alpha OS=Homo sapiens GN=TCF3 PE=1 SV=1
3.11548	0	0	5.38082	0	0	0.734048	0.937361	1	1	-0.755115	48.3333	1	0	>sp|P15924|DESP_HUMAN Desmoplakin OS=Homo sapiens GN=DSP PE=1 SV=3
0	0	0.5025	0	1.05889	1.77259	0.920825	0.972756	2	1	-0.0703985	3.91667	1	0	>sp|P15927|RFA2_HUMAN Replication protein A 32 kDa subunit OS=Homo sapiens GN=RPA2 PE=1 SV=1
0.321928	1.36923	0	1	2.41504	0	0.893613	0.972756	2	2	0.122577	7.16667	1	0	>sp|P16104|H2AX_HUMAN Histone H2AX OS=Homo sapiens GN=H2AFX PE=1 SV=2
0	0	0	0	0	0	NaN	NaN	0	0	0	0	2	0	>sp|P16150|LEUK_HUMAN Leukosialin OS=Homo sapiens GN=SPN PE=1 SV=1
0	0	0	0	1.62449	1.27302	0.873042	0.969525	1	1	0.117157	3.5	1	0	>sp|P16152|CBR1_HUMAN Carbonyl reductase [NADPH] 1 OS=Homo sapiens GN=CBR1 PE=1 SV=3
0	1.5025	0	0	0	0	0.373901	0.686745	0	1	-0.500833	1.83333	2	0	>sp|P16188|1A30_HUMAN HLA class I histocompatibility antigen, A-30 alpha chain OS=Homo sapiens GN=HLA-A PE=1 SV=2
0	1.05889	0	0	0	0	0.373901	0.686745	0	1	-0.352965	1.08333	2	0	>sp|P16189|1A31_HUMAN HLA class I histocompatibility antigen, A-31 alpha chain OS=Homo sapiens GN=HLA-A PE=1 SV=2
0	1.27302	0	0	0.736966	0	0.733988	0.937361	1	1	-0.178684	2.08333	2	0	>sp|P16190|1A33_HUMAN HLA class I histocompatibility antigen, A-33 alpha chain OS=Homo sapiens GN=HLA-A PE=1 SV=3
1.54432	0	0	0	0	0	0.373901	0.686745	1	0	0.514774	1.91667	1	0	>sp|P16219|ACADS_HUMAN Short-chain specific acyl-CoA dehydrogenase, mitochondrial OS=Homo sapiens GN=ACADS PE=1 SV=1
0	0	2.92283	2.1964	0.938599	2.34577	0.852913	0.964759	2	2	-0.226913	15.1667	2	0	>sp|P16298|PP2BB_HUMAN Serine/threonine-protein phosphatase 2B catalytic subunit beta isoform OS=Homo sapiens GN=PPP3CB PE=1 SV=2
0	0	0	0	3.08746	0	0.373901	0.686745	1	0	1.02915	7.5	1	0	>sp|P16401|H15_HUMAN Histone H1.5 OS=Homo sapiens GN=HIST1H1B PE=1 SV=3
0	0	0	0	2.66297	0	0.373901	0.686745	1	0	0.887655	5.33333	1	0	>sp|P16402|H13_HUMAN Histone H1.3 OS=Homo sapiens GN=HIST1H1D PE=1 SV=2
0	0	0	0	2.82443	0	0.373901	0.686745	1	0	0.941476	6.08333	1	0	>sp|P16403|H12_HUMAN Histone H1.2 OS=Homo sapiens GN=HIST1H1C PE=1 SV=2
0	0	0	0	0	0	NaN	NaN	0	0	0	0	2	0.00248756	>sp|P16435|NCPR_HUMAN NADPH--cytochrome P450 reductase OS=Homo sapiens GN=POR PE=1 SV=2
0	0	0	0	1.62449	1.77259	0.95384	0.980796	1	1	-0.0493662	4.5	1	0	>sp|P16455|MGMT_HUMAN Methylated-DNA--protein-cysteine methyltransferase OS=Homo sapiens GN=MGMT PE=1 SV=1
0	0	0	0	1.05889	1.27302	0.903351	0.972756	1	1	-0.0713749	2.5	3	0	>sp|P16520|GBB3_HUMAN Guanine nucleotide-binding protein G(I)/G(S)/G(T) subunit beta-3 OS=Homo sapiens GN=GNB3 PE=1 SV=1
1.9542	4.20294	0	0	3.54432	3.39232	0.692879	0.919497	2	2	-0.698914	40.4583	1	0	>sp|P16615|AT2A2_HUMAN Sarcoplasmic/endoplasmic reticulum calcium ATPase 2 OS=Homo sapiens GN=ATP2A2 PE=1 SV=1
0	0	0	0	0	0	NaN	NaN	0	0	0	0	1	0	>sp|P16885|PLCG2_HUMAN 1-phosphatidylinositol 4,5-bisphosphate phosphodiesterase gamma-2 OS=Homo sapiens GN=PLCG2 PE=1 SV=4
0	0	0	0	0	0	NaN	NaN	0	0	0	0	1	0.00331126	>sp|P16930|FAAA_HUMAN Fumarylacetoacetase OS=Homo sapiens GN=FAH PE=1 SV=2
0	0	0	0	0	0	NaN	NaN	0	0	0	0	1	0	>sp|P16989|YBOX3_HUMAN Y-box-binding protein 3 OS=Homo sapiens GN=YBX3 PE=1 SV=4
0	1.27302	0	0	0.415037	0	0.556534	0.853691	1	1	-0.285994	1.75	1	0	>sp|P17028|ZNF24_HUMAN Zinc finger protein 24 OS=Homo sapiens GN=ZNF24 PE=1 SV=4
1.32193	0.736966	0	0	0	0	0.718804	0.929125	1	1	0.194988	2.16667	2	0	>sp|P17029|ZKSC1_HUMAN Zinc finger protein with KRAB and SCAN domains 1 OS=Homo sapiens GN=ZKSCAN1 PE=1 SV=3
0.874469	0	0.5025	1.27302	1.05889	0.662965	0.700033	0.923401	3	2	0.166627	4.33333	1	0	>sp|P17036|ZNF3_HUMAN Zinc finger protein 3 OS=Homo sapiens GN=ZNF3 PE=1 SV=3
0	1.62449	0	0	3.21594	4.3634	0.608376	0.878497	1	2	-0.923986	29.9583	1	0	>sp|P17066|HSP76_HUMAN Heat shock 70 kDa protein 6 OS=Homo sapiens GN=HSPA6 PE=1 SV=2
0	0	0	0	0	0	NaN	NaN	0	0	0	0	1	0	>sp|P17174|AATC_HUMAN Aspartate aminotransferase, cytoplasmic OS=Homo sapiens GN=GOT1 PE=1 SV=3
0	0	0	0	0	0	NaN	NaN	0	0	0	0	2	0.00942285	>sp|P17252|KPCA_HUMAN Protein kinase C alpha type OS=Homo sapiens GN=PRKCA PE=1 SV=4
0	0	0	0	0	0	NaN	NaN	0	0	0	0	2	0.00845666	>sp|P17480|UBF1_HUMAN Nucleolar transcription factor 1 OS=Homo sapiens GN=UBTF PE=1 SV=1
0	0	0	0	1.05889	0	0.373901	0.686745	1	0	0.352965	1.08333	1	0	>sp|P17568|NDUB7_HUMAN NADH dehydrogenase [ubiquinone] 1 beta subcomplex subunit 7 OS=Homo sapiens GN=NDUFB7 PE=1 SV=4
0.874469	0	0.5025	0	1.05889	1.27302	0.44208	0.764858	3	1	0.387615	3.75	1	0	>sp|P17612|KAPCA_HUMAN cAMP-dependent protein kinase catalytic subunit alpha OS=Homo sapiens GN=PRKACA PE=1 SV=2
1.45943	0	3.26053	0	0	1.41504	0.355072	0.686745	2	1	1.10164	12	1	0	>sp|P17661|DESM_HUMAN Desmin OS=Homo sapiens GN=DES PE=1 SV=3
0	0	0	0	0	0	NaN	NaN	0	0	0	0	2	0	>sp|P17693|HLAG_HUMAN HLA class I histocompatibility antigen, alpha chain G OS=Homo sapiens GN=HLA-G PE=1 SV=1
2.54432	0	1.11548	1.27302	1.62449	0.5025	0.104316	0.686745	3	2	1.16959	9.91667	2	0	>sp|P17706|PTN2_HUMAN Tyrosine-protein phosphatase non-receptor type 2 OS=Homo sapiens GN=PTPN2 PE=1 SV=2
0	1.5025	0	0	0	0	0.373901	0.686745	0	1	-0.500833	1.83333	1	0	>sp|P17812|PYRG1_HUMAN CTP synthase 1 OS=Homo sapiens GN=CTPS1 PE=1 SV=2
0	0	1.16993	0	0	0	0.373901	0.686745	1	0	0.389975	1.25	2	0	>sp|P17844|DDX5_HUMAN Probable ATP-dependent RNA helicase DDX5 OS=Homo sapiens GN=DDX5 PE=1 SV=1
1.77259	1.36923	1.16993	0	0	0	0.490836	0.811197	2	1	0.524427	5.25	1	0	>sp|P17858|PFKAL_HUMAN ATP-dependent 6-phosphofructokinase, liver type OS=Homo sapiens GN=PFKL PE=1 SV=6
1.5025	2.36923	3.05889	2.60486	4.11548	4.71882	0.766361	0.940709	3	3	-0.338681	60.0833	2	0	>sp|P17980|PRS6A_HUMAN 26S protease regulatory subunit 6A OS=Homo sapiens GN=PSMC3 PE=1 SV=3
0	0	3.40372	0	0	0	0.373901	0.686745	1	0	1.13457	9.58333	2	0	>sp|P17987|TCPA_HUMAN T-complex protein 1 subunit alpha OS=Homo sapiens GN=TCP1 PE=1 SV=1
2.43741	0	1.77259	1.8413	0	0	0.45342	0.773992	2	1	0.789564	9.41667	1	0	>sp|P18031|PTN1_HUMAN Tyrosine-protein phosphatase non-receptor type 1 OS=Homo sapiens GN=PTPN1 PE=1 SV=1
0	0	0	0	0	0	NaN	NaN	0	0	0	0	2	0	>sp|P18074|ERCC2_HUMAN TFIIH basal transcription factor complex helicase XPD subunit OS=Homo sapiens GN=ERCC2 PE=1 SV=1
0	1.27302	0	0	2.52356	0	0.681042	0.910508	1	1	0.416848	6.16667	2	0	>sp|P18085|ARF4_HUMAN ADP-ribosylation factor 4 OS=Homo sapiens GN=ARF4 PE=1 SV=3
0.807355	0	2.16993	2.02975	1.41504	0	0.371426	0.686745	3	1	0.787523	9	1	0	>sp|P18124|RL7_HUMAN 60S ribosomal protein L7 OS=Homo sapiens GN=RPL7 PE=1 SV=1
0	0	0	0	1.62449	0	0.373901	0.686745	1	0	0.541497	2.08333	1	0	>sp|P18206|VINC_HUMAN Vinculin OS=Homo sapiens GN=VCL PE=1 SV=4
0	1.27302	0	0	0	0.662965	0.154016	0.686745	0	2	-0.645328	2	2	0	>sp|P18440|ARY1_HUMAN Arylamine N-acetyltransferase 1 OS=Homo sapiens GN=NAT1 PE=1 SV=2
0	1.90689	0	0	0	0.807355	0.176932	0.686745	0	2	-0.904749	3.5	2	0	>sp|P18462|1A25_HUMAN HLA class I histocompatibility antigen, A-25 alpha chain OS=Homo sapiens GN=HLA-A PE=1 SV=1
0	0	0	0	2	0	0.373901	0.686745	1	0	0.666667	3	2	0	>sp|P18463|1B37_HUMAN HLA class I histocompatibility antigen, B-37 alpha chain OS=Homo sapiens GN=HLA-B PE=1 SV=1
0	0	0	0	0	0	NaN	NaN	0	0	0	0	2	0	>sp|P18464|1B51_HUMAN HLA class I histocompatibility antigen, B-51 alpha chain OS=Homo sapiens GN=HLA-B PE=1 SV=1
0	0	0	0	0	0.807355	0.373901	0.686745	0	1	-0.269118	0.75	2	0	>sp|P18465|1B57_HUMAN HLA class I histocompatibility antigen, B-57 alpha chain OS=Homo sapiens GN=HLA-B PE=1 SV=1
2.34577	3.10154	3.41504	2.73697	3.36923	2.9542	0.773246	0.942167	3	3	0.112449	43.0833	1	0	>sp|P18583|SON_HUMAN Protein SON OS=Homo sapiens GN=SON PE=1 SV=4
0	0	0	0	1.62449	0.662965	0.612829	0.878706	1	1	0.320509	2.66667	2	0	>sp|P18621|RL17_HUMAN 60S ribosomal protein L17 OS=Homo sapiens GN=RPL17 PE=1 SV=3
0	0	0	0	0	0	NaN	NaN	0	0	0	0	1	0	>sp|P18669|PGAM1_HUMAN Phosphoglycerate mutase 1 OS=Homo sapiens GN=PGAM1 PE=1 SV=2
3.9386	3.78136	3.55459	3.39232	2.73697	0	0.461469	0.782617	3	2	1.01883	53	2	0	>sp|P18858|DNLI1_HUMAN DNA ligase 1 OS=Homo sapiens GN=LIG1 PE=1 SV=1
0	0	0	0	0	0	NaN	NaN	0	0	0	0	2	0	>sp|P19012|K1C15_HUMAN Keratin, type I cytoskeletal 15 OS=Homo sapiens GN=KRT15 PE=1 SV=3
0	0	0	4.32193	0	0	0.373901	0.686745	0	1	-1.44064	19	2	0	>sp|P19013|K2C4_HUMAN Keratin, type II cytoskeletal 4 OS=Homo sapiens GN=KRT4 PE=1 SV=4
0	0	1.27302	0	1.05889	0.662965	0.285222	0.686745	2	1	0.556316	3.08333	1	0	>sp|P19086|GNAZ_HUMAN Guanine nucleotide-binding protein G(z) subunit alpha OS=Homo sapiens GN=GNAZ PE=2 SV=3
0	0	0	0	0	0	NaN	NaN	0	0	0	0	1	0	>sp|P19087|GNAT2_HUMAN Guanine nucleotide-binding protein G(t) subunit alpha-2 OS=Homo sapiens GN=GNAT2 PE=2 SV=4
0	0	0	0	2.32193	0	0.373901	0.686745	1	0	0.773976	4	2	0	>sp|P19105|ML12A_HUMAN Myosin regulatory light chain 12A OS=Homo sapiens GN=MYL12A PE=1 SV=2
0	0	0	0	4.30986	0	0.373901	0.686745	1	0	1.43662	18.8333	1	0	>sp|P19338|NUCL_HUMAN Nucleolin OS=Homo sapiens GN=NCL PE=1 SV=3
0	0	0	0	1.05889	1.27302	0.903351	0.972756	1	1	-0.0713749	2.5	1	0	>sp|P19367|HXK1_HUMAN Hexokinase-1 OS=Homo sapiens GN=HK1 PE=1 SV=3
1.54432	1.27302	0	0	0	1.27302	0.642999	0.888473	1	2	-0.333905	4.75	1	0	>sp|P19387|RPB3_HUMAN DNA-directed RNA polymerase II subunit RPB3 OS=Homo sapiens GN=POLR2C PE=1 SV=2
0	0	1.11548	0	1.05889	0	0.116386	0.686745	2	0	0.72479	2.25	2	0	>sp|P19388|RPAB1_HUMAN DNA-directed RNA polymerases I, II, and III subunit RPABC1 OS=Homo sapiens GN=POLR2E PE=1 SV=4
0	0	1.73697	0	0.415037	0	0.242628	0.686745	2	0	0.717334	2.66667	2	0	>sp|P19404|NDUV2_HUMAN NADH dehydrogenase [ubiquinone] flavoprotein 2, mitochondrial OS=Homo sapiens GN=NDUFV2 PE=1 SV=2
0	0	0	0	0	0.662965	0.373901	0.686745	0	1	-0.220988	0.583333	1	0.00180343	>sp|P19419|ELK1_HUMAN ETS domain-containing protein Elk-1 OS=Homo sapiens GN=ELK1 PE=1 SV=2
1.32193	0.736966	1.11548	1.27302	0	1.27302	0.563201	0.856525	2	3	-0.281866	6.16667	2	0	>sp|P19484|TFEB_HUMAN Transcription factor EB OS=Homo sapiens GN=TFEB PE=1 SV=3
0	0	0	0	0	0	NaN	NaN	0	0	0	0	1	0	>sp|P19525|E2AK2_HUMAN Interferon-induced, double-stranded RNA-activated protein kinase OS=Homo sapiens GN=EIF2AK2 PE=1 SV=2
1	0	0	0	2.18322	0	0.167934	0.686745	2	0	1.06107	4.54167	1	0	>sp|P19623|SPEE_HUMAN Spermidine synthase OS=Homo sapiens GN=SRM PE=1 SV=1
1.77259	0	0	0	1.05889	0	0.140747	0.686745	2	0	0.943828	3.5	1	0	>sp|P19784|CSK22_HUMAN Casein kinase II subunit alpha' OS=Homo sapiens GN=CSNK2A2 PE=1 SV=1
0	0	0	0	0	1.27302	0.373901	0.686745	0	1	-0.424339	1.41667	1	0.00210526	>sp|P19838|NFKB1_HUMAN Nuclear factor NF-kappa-B p105 subunit OS=Homo sapiens GN=NFKB1 PE=1 SV=2
4.3159	4.37504	0	0	0.415037	0	0.955636	0.981639	2	1	0.118634	39	2	0	>sp|P19961|AMY2B_HUMAN Alpha-amylase 2B OS=Homo sapiens GN=AMY2B PE=1 SV=1
3.23522	2.24793	2.70044	2.98489	0	0	0.870158	0.969525	2	2	0.234279	24.5833	1	0	>sp|P20020|AT2B1_HUMAN Plasma membrane calcium-transporting ATPase 1 OS=Homo sapiens GN=ATP2B1 PE=1 SV=3
0.321928	0	0	1.27302	1.62449	0	0.748425	0.940709	2	1	0.224467	3.75	2	0	>sp|P20039|2B1B_HUMAN HLA class II histocompatibility antigen, DRB1-11 beta chain OS=Homo sapiens GN=HLA-DRB1 PE=1 SV=1
0	0	1.11548	1.27302	0	0	0.930318	0.972756	1	1	-0.0525138	2.58333	1	0	>sp|P20042|IF2B_HUMAN Eukaryotic translation initiation factor 2 subunit 2 OS=Homo sapiens GN=EIF2S2 PE=1 SV=2
0	0	0	0	0	0	NaN	NaN	0	0	0	0	1	0	>sp|P20073|ANXA7_HUMAN Annexin A7 OS=Homo sapiens GN=ANXA7 PE=1 SV=3
0	0	1.73697	1.27302	0	0	0.839966	0.962457	1	1	0.154649	3.75	2	0	>sp|P20226|TBP_HUMAN TATA-box-binding protein OS=Homo sapiens GN=TBP PE=1 SV=2
0	0	0	0	0	0	NaN	NaN	0	0	0	0	4	0.00330579	>sp|P20336|RAB3A_HUMAN Ras-related protein Rab-3A OS=Homo sapiens GN=RAB3A PE=1 SV=1
0	0	0	0	0	0	NaN	NaN	0	0	0	0	4	0.00330033	>sp|P20337|RAB3B_HUMAN Ras-related protein Rab-3B OS=Homo sapiens GN=RAB3B PE=1 SV=2
0	0	0	0	0	0	NaN	NaN	0	0	0	0	4	0.00322061	>sp|P20338|RAB4A_HUMAN Ras-related protein Rab-4A OS=Homo sapiens GN=RAB4A PE=1 SV=3
1	0	0	0	0	0	0.373901	0.686745	1	0	0.333333	1	1	0	>sp|P20339|RAB5A_HUMAN Ras-related protein Rab-5A OS=Homo sapiens GN=RAB5A PE=1 SV=2
0	0	0	0	0	0	NaN	NaN	0	0	0	0	2	0	>sp|P20340|RAB6A_HUMAN Ras-related protein Rab-6A OS=Homo sapiens GN=RAB6A PE=1 SV=3
0.938599	1.90689	0	0	2.32193	1.27302	0.977023	0.992155	2	2	0.0268728	9.08333	2	0	>sp|P20591|MX1_HUMAN Interferon-induced GTP-binding protein Mx1 OS=Homo sapiens GN=MX1 PE=1 SV=4
0.874469	1.27302	1.11548	0	2	0.662965	0.24447	0.686745	3	2	0.684654	7	1	0	>sp|P20592|MX2_HUMAN Interferon-induced GTP-binding protein Mx2 OS=Homo sapiens GN=MX2 PE=1 SV=1
0	0	0	0	1.80735	3.61471	0.677869	0.910372	1	1	-0.602452	13.75	1	0	>sp|P20618|PSB1_HUMAN Proteasome subunit beta type-1 OS=Homo sapiens GN=PSMB1 PE=1 SV=2
0	0	0	1	2.52356	1.27302	0.932467	0.973449	1	2	0.0835145	7.16667	1	0	>sp|P20648|ATP4A_HUMAN Potassium-transporting ATPase alpha chain 1 OS=Homo sapiens GN=ATP4A PE=2 SV=5
0	1.36923	2.70044	0	2.9542	0	0.245192	0.686745	2	1	1.42847	13.8333	2	0	>sp|P20671|H2A1D_HUMAN Histone H2A type 1-D OS=Homo sapiens GN=HIST1H2AD PE=1 SV=2
0	0	0	0	1.05889	0	0.373901	0.686745	1	0	0.352965	1.08333	2	0	>sp|P20674|COX5A_HUMAN Cytochrome c oxidase subunit 5A, mitochondrial OS=Homo sapiens GN=COX5A PE=1 SV=2
5.35462	5.71653	5.04985	4.57743	5.07682	5.87754	0.61347	0.878706	3	3	-0.230074	237.042	1	0	>sp|P20700|LMNB1_HUMAN Lamin-B1 OS=Homo sapiens GN=LMNB1 PE=1 SV=2
1.5025	0	2.52356	0	0.415037	1.27302	0.227801	0.686745	3	1	1.05603	8.33333	1	0	>sp|P20794|MAK_HUMAN Serine/threonine-protein kinase MAK OS=Homo sapiens GN=MAK PE=1 SV=2
0	0	0	0	0	0	NaN	NaN	0	0	0	0	2	0	>sp|P20839|IMDH1_HUMAN Inosine-5'-monophosphate dehydrogenase 1 OS=Homo sapiens GN=IMPDH1 PE=1 SV=2
1.77259	0	0	0	0	0.662965	0.589149	0.873758	1	1	0.369875	3	2	0	>sp|P21108|PRPS3_HUMAN Ribose-phosphate pyrophosphokinase 3 OS=Homo sapiens GN=PRPS1L1 PE=1 SV=2
1.77259	2.34577	0	0	0	0	0.854935	0.964759	1	1	-0.191062	6.5	2	0	>sp|P21127|CD11B_HUMAN Cyclin-dependent kinase 11B OS=Homo sapiens GN=CDK11B PE=1 SV=3
0.321928	0	0	0	0	0	0.373901	0.686745	1	0	0.107309	0.25	3	0	>sp|P21266|GSTM3_HUMAN Glutathione S-transferase Mu 3 OS=Homo sapiens GN=GSTM3 PE=1 SV=3
0	0	0	0.736966	0	0	0.373901	0.686745	0	1	-0.245655	0.666667	1	0	>sp|P21281|VATB2_HUMAN V-type proton ATPase subunit B, brain isoform OS=Homo sapiens GN=ATP6V1B2 PE=1 SV=3
2.23522	2.1565	0	3.12928	4.8413	0.874469	0.852821	0.964759	2	3	0.305421	43.4167	2	0	>sp|P21333|FLNA_HUMAN Filamin-A OS=Homo sapiens GN=FLNA PE=1 SV=4
0	0	1.73697	1.27302	2.32193	1.77259	0.718962	0.929125	2	2	0.337762	10.1667	2	0	>sp|P21580|TNAP3_HUMAN Tumor necrosis factor alpha-induced protein 3 OS=Homo sapiens GN=TNFAIP3 PE=1 SV=1
0	0.222392	3.2854	0	0	1.9386	0.780044	0.945054	1	2	0.374803	11.75	1	0	>sp|P21796|VDAC1_HUMAN Voltage-dependent anion-selective channel protein 1 OS=Homo sapiens GN=VDAC1 PE=1 SV=2
1.11548	0.662965	0	0	0	0	0.744877	0.940709	1	1	0.150837	1.75	2	0	>sp|P21802|FGFR2_HUMAN Fibroblast growth factor receptor 2 OS=Homo sapiens GN=FGFR2 PE=1 SV=1
0	0	1.73697	0	0.736966	0	0.176687	0.686745	2	0	0.824644	3	1	0	>sp|P21912|SDHB_HUMAN Succinate dehydrogenase [ubiquinone] iron-sulfur subunit, mitochondrial OS=Homo sapiens GN=SDHB PE=1 SV=3
0	0	0	0	0	0	NaN	NaN	0	0	0	0	1	0.0068918	>sp|P21941|MATN1_HUMAN Cartilage matrix protein OS=Homo sapiens GN=MATN1 PE=1 SV=1
0	0	1.73697	0	0	0	0.373901	0.686745	1	0	0.578989	2.33333	2	0	>sp|P21964|COMT_HUMAN Catechol O-methyltransferase OS=Homo sapiens GN=COMT PE=1 SV=2
1.32193	0	0	0	0	0	0.373901	0.686745	1	0	0.440643	1.5	2	0	>sp|P22061|PIMT_HUMAN Protein-L-isoaspartate(D-aspartate) O-methyltransferase OS=Homo sapiens GN=PCMT1 PE=1 SV=4
0	0	1.11548	0	1.05889	0	0.116386	0.686745	2	0	0.72479	2.25	2	0	>sp|P22087|FBRL_HUMAN rRNA 2'-O-methyltransferase fibrillarin OS=Homo sapiens GN=FBL PE=1 SV=2
0	0	2.05889	1.27302	0	0	0.761713	0.940709	1	1	0.261958	4.58333	3	0	>sp|P22090|RS4Y1_HUMAN 40S ribosomal protein S4, Y isoform 1 OS=Homo sapiens GN=RPS4Y1 PE=1 SV=2
0	0	0	0	0	0	NaN	NaN	0	0	0	0	1	0	>sp|P22102|PUR2_HUMAN Trifunctional purine biosynthetic protein adenosine-3 OS=Homo sapiens GN=GART PE=1 SV=1
0	0	0	0	0	0	NaN	NaN	0	0	0	0	2	0	>sp|P22234|PUR6_HUMAN Multifunctional protein ADE2 OS=Homo sapiens GN=PAICS PE=1 SV=3
0	0	0	0	0	0	NaN	NaN	0	0	0	0	1	0	>sp|P22314|UBA1_HUMAN Ubiquitin-like modifier-activating enzyme 1 OS=Homo sapiens GN=UBA1 PE=1 SV=3
0	0	0	0	2	0	0.373901	0.686745	1	0	0.666667	3	3	0	>sp|P22392|NDKB_HUMAN Nucleoside diphosphate kinase B OS=Homo sapiens GN=NME2 PE=1 SV=1
1.5025	0	0	0	0	0	0.373901	0.686745	1	0	0.500833	1.83333	2	0	>sp|P22455|FGFR4_HUMAN Fibroblast growth factor receptor 4 OS=Homo sapiens GN=FGFR4 PE=1 SV=2
0	0	0	0	0	0.662965	0.373901	0.686745	0	1	-0.220988	0.583333	3	0	>sp|P22492|H1T_HUMAN Histone H1t OS=Homo sapiens GN=HIST1H1T PE=2 SV=4
1.77259	0	1.73697	0	3.08746	2.58496	0.239856	0.686745	3	1	1.33735	17.25	1	0	>sp|P22570|ADRO_HUMAN NADPH:adrenodoxin oxidoreductase, mitochondrial OS=Homo sapiens GN=FDXR PE=1 SV=3
1.11548	0	0	0	0	0	0.373901	0.686745	1	0	0.371826	1.16667	4	0	>sp|P22607|FGFR3_HUMAN Fibroblast growth factor receptor 3 OS=Homo sapiens GN=FGFR3 PE=1 SV=1
0	0	0	0	1.41504	0	0.373901	0.686745	1	0	0.471679	1.66667	1	0	>sp|P22626|ROA2_HUMAN Heterogeneous nuclear ribonucleoproteins A2/B1 OS=Homo sapiens GN=HNRNPA2B1 PE=1 SV=2
0	0	0	0	0	0	NaN	NaN	0	0	0	0	1	0.0077821	>sp|P22680|CP7A1_HUMAN Cholesterol 7-alpha-monooxygenase OS=Homo sapiens GN=CYP7A1 PE=1 SV=2
0	1.27302	0	0	1.05889	0	0.903351	0.972756	1	1	-0.0713749	2.5	1	0.00331309	>sp|P22694|KAPCB_HUMAN cAMP-dependent protein kinase catalytic subunit beta OS=Homo sapiens GN=PRKACB PE=1 SV=2
1.58496	1.8413	2.16993	0.807355	1.11548	0.5025	0.321617	0.686745	3	3	0.573069	10.4167	1	0	>sp|P22695|QCR2_HUMAN Cytochrome b-c1 complex subunit 2, mitochondrial OS=Homo sapiens GN=UQCRC2 PE=1 SV=3
0	1.27302	0	0.736966	0	0	0.143601	0.686745	0	2	-0.669995	2.08333	1	0	>sp|P22732|GTR5_HUMAN Solute carrier family 2, facilitated glucose transporter member 5 OS=Homo sapiens GN=SLC2A5 PE=1 SV=1
3.10154	0	3.68182	1.36923	2.36923	3.58496	0.276417	0.686745	3	2	1.39947	36.1667	1	0	>sp|P22830|HEMH_HUMAN Ferrochelatase, mitochondrial OS=Homo sapiens GN=FECH PE=1 SV=2
0	0	0	0	2.73697	0	0.373901	0.686745	1	0	0.912322	5.66667	1	0	>sp|P23193|TCEA1_HUMAN Transcription elongation factor A protein 1 OS=Homo sapiens GN=TCEA1 PE=1 SV=2
2.24793	0	2.22239	1.62449	0	0	0.361257	0.686745	2	1	0.94861	9.5	1	0	>sp|P23246|SFPQ_HUMAN Splicing factor, proline- and glutamine-rich OS=Homo sapiens GN=SFPQ PE=1 SV=2
1.5025	0.736966	0	1.77259	1.62449	0	0.792781	0.946645	2	2	0.205812	7	1	0	>sp|P23258|TBG1_HUMAN Tubulin gamma-1 chain OS=Homo sapiens GN=TUBG1 PE=1 SV=2
0	0	0	0	1.05889	0	0.373901	0.686745	1	0	0.352965	1.08333	1	0	>sp|P23284|PPIB_HUMAN Peptidyl-prolyl cis-trans isomerase B OS=Homo sapiens GN=PPIB PE=1 SV=2
0	0	0	0	1.62449	0	0.373901	0.686745	1	0	0.541497	2.08333	1	0	>sp|P23368|MAOM_HUMAN NAD-dependent malic enzyme, mitochondrial OS=Homo sapiens GN=ME2 PE=1 SV=1
0	0	0	0	2	0	0.373901	0.686745	1	0	0.666667	3	1	0	>sp|P23381|SYWC_HUMAN Tryptophan--tRNA ligase, cytoplasmic OS=Homo sapiens GN=WARS PE=1 SV=2
0	0	2.16993	0	0	3.34577	0.782772	0.946645	1	1	-0.39195	12.6667	2	0	>sp|P23396|RS3_HUMAN 40S ribosomal protein S3 OS=Homo sapiens GN=RPS3 PE=1 SV=2
2.89077	2.75489	2.70044	2.34577	2.32193	2.34577	0.51076	0.822654	3	3	0.155567	29.8333	1	0	>sp|P23458|JAK1_HUMAN Tyrosine-protein kinase JAK1 OS=Homo sapiens GN=JAK1 PE=1 SV=2
0	0	0	0	0	1.27302	0.373901	0.686745	0	1	-0.424339	1.41667	1	0	>sp|P23469|PTPRE_HUMAN Receptor-type tyrosine-protein phosphatase epsilon OS=Homo sapiens GN=PTPRE PE=1 SV=1
0	0	0	0	0	0	NaN	NaN	0	0	0	0	1	0.00849618	>sp|P23497|SP100_HUMAN Nuclear autoantigen Sp-100 OS=Homo sapiens GN=SP100 PE=1 SV=3
0	0	0	0	0	0	NaN	NaN	0	0	0	0	1	0	>sp|P23526|SAHH_HUMAN Adenosylhomocysteinase OS=Homo sapiens GN=AHCY PE=1 SV=4
0	0	1.73697	2.54432	3.22239	0	0.557492	0.853691	2	1	0.805012	15.5	2	0	>sp|P23527|H2B1O_HUMAN Histone H2B type 1-O OS=Homo sapiens GN=HIST1H2BO PE=1 SV=3
0	0	0	0	2.73697	0	0.373901	0.686745	1	0	0.912322	5.66667	1	0	>sp|P23528|COF1_HUMAN Cofilin-1 OS=Homo sapiens GN=CFL1 PE=1 SV=3
0	0	0	0	0	0	NaN	NaN	0	0	0	0	2	0	>sp|P23588|IF4B_HUMAN Eukaryotic translation initiation factor 4B OS=Homo sapiens GN=EIF4B PE=1 SV=2
0	0	1.11548	0	0	0	0.373901	0.686745	1	0	0.371826	1.16667	1	0	>sp|P23610|F8I2_HUMAN Factor VIII intron 22 protein OS=Homo sapiens GN=F8A1 PE=1 SV=2
2.54432	0	1.73697	2.1964	0	0	0.543715	0.851907	2	1	0.694963	10.75	1	0	>sp|P23634|AT2B4_HUMAN Plasma membrane calcium-transporting ATPase 4 OS=Homo sapiens GN=ATP2B4 PE=1 SV=2
1.77259	1.27302	1.11548	0	0	0.662965	0.643302	0.888473	2	2	0.317361	5.58333	1	0	>sp|P23743|DGKA_HUMAN Diacylglycerol kinase alpha OS=Homo sapiens GN=DGKA PE=1 SV=3
0	0	0	0	1.62449	2.02975	0.883677	0.972507	1	1	-0.135085	5.16667	1	0	>sp|P23919|KTHY_HUMAN Thymidylate kinase OS=Homo sapiens GN=DTYMK PE=1 SV=4
0	0	0	0	0	0	NaN	NaN	0	0	0	0	1	0	>sp|P23921|RIR1_HUMAN Ribonucleoside-diphosphate reductase large subunit OS=Homo sapiens GN=RRM1 PE=1 SV=1
0	0	0	0	0	0	NaN	NaN	0	0	0	0	2	0.00753769	>sp|P24298|ALAT1_HUMAN Alanine aminotransferase 1 OS=Homo sapiens GN=GPT PE=1 SV=3
0.662965	0	1.77259	0	1.05889	2.02975	0.550792	0.853691	3	1	0.488234	7.16667	1	0	>sp|P24385|CCND1_HUMAN G1/S-specific cyclin-D1 OS=Homo sapiens GN=CCND1 PE=1 SV=1
0	0	0	0	0	0	NaN	NaN	0	0	0	0	1	0	>sp|P24534|EF1B_HUMAN Elongation factor 1-beta OS=Homo sapiens GN=EEF1B2 PE=1 SV=3
2.34577	1.27302	2.36923	0	2	2.34577	0.208197	0.686745	3	2	1.03207	16.75	1	0	>sp|P24539|AT5F1_HUMAN ATP synthase F(0) complex subunit B1, mitochondrial OS=Homo sapiens GN=ATP5F1 PE=1 SV=2
0.736966	0.938599	2.92283	1.36923	3.56478	3.08746	0.602064	0.874881	3	3	0.609762	28.0833	1	0	>sp|P24752|THIL_HUMAN Acetyl-CoA acetyltransferase, mitochondrial OS=Homo sapiens GN=ACAT1 PE=1 SV=1
0	0	0	0	1.62449	0	0.373901	0.686745	1	0	0.541497	2.08333	4	0	>sp|P24844|MYL9_HUMAN Myosin regulatory light polypeptide 9 OS=Homo sapiens GN=MYL9 PE=1 SV=4
1.32193	0	0.662965	0	0	1.27302	0.698898	0.923323	2	1	0.237292	3.5	2	0	>sp|P24863|CCNC_HUMAN Cyclin-C OS=Homo sapiens GN=CCNC PE=1 SV=2
2.54432	0.321928	0	0	0	0	0.435069	0.758846	1	1	0.740797	5.08333	2	0	>sp|P24928|RPB1_HUMAN DNA-directed RNA polymerase II subunit RPB1 OS=Homo sapiens GN=POLR2A PE=1 SV=2
2.98489	0.938599	2.64386	3.04439	2.61471	1.9386	0.279761	0.686745	3	3	0.773955	28.2917	2	0	>sp|P24941|CDK2_HUMAN Cyclin-dependent kinase 2 OS=Homo sapiens GN=CDK2 PE=1 SV=2
0	0	0	0	0	0.662965	0.373901	0.686745	0	1	-0.220988	0.583333	1	0.00673854	>sp|P25098|ARBK1_HUMAN Beta-adrenergic receptor kinase 1 OS=Homo sapiens GN=ADRBK1 PE=1 SV=2
3.03709	3.16323	3.98109	0	3.1964	0	0.0981546	0.686745	3	1	2.35045	38.125	1	0	>sp|P25205|MCM3_HUMAN DNA replication licensing factor MCM3 OS=Homo sapiens GN=MCM3 PE=1 SV=3
0	0.736966	0	1.8413	0	0	0.183496	0.686745	0	2	-0.859423	3.25	1	0	>sp|P25311|ZA2G_HUMAN Zinc-alpha-2-glycoprotein OS=Homo sapiens GN=AZGP1 PE=1 SV=2
0	0	0	0	1.05889	0	0.373901	0.686745	1	0	0.352965	1.08333	1	0	>sp|P25398|RS12_HUMAN 40S ribosomal protein S12 OS=Homo sapiens GN=RPS12 PE=1 SV=3
0	0	1.11548	0	0	0	0.373901	0.686745	1	0	0.371826	1.16667	1	0	>sp|P25490|TYY1_HUMAN Transcriptional repressor protein YY1 OS=Homo sapiens GN=YY1 PE=1 SV=2
2.56478	0	3	0	2.16993	3.05889	0.210964	0.686745	3	1	1.55861	22.75	1	0	>sp|P25685|DNJB1_HUMAN DnaJ homolog subfamily B member 1 OS=Homo sapiens GN=DNAJB1 PE=1 SV=4
2.62449	1.73697	1.77259	2.54432	3.93074	3.58496	0.861069	0.967523	3	3	0.153856	40	1	0	>sp|P25686|DNJB2_HUMAN DnaJ homolog subfamily B member 2 OS=Homo sapiens GN=DNAJB2 PE=1 SV=3
0	2.38082	3.27922	0	1.16993	0	0.609279	0.878706	2	1	0.689442	14.1667	1	0	>sp|P25705|ATPA_HUMAN ATP synthase subunit alpha, mitochondrial OS=Homo sapiens GN=ATP5A1 PE=1 SV=1
2.5025	0	0	1.96963	3.1964	3.77259	0.992578	0.997903	2	2	-0.0144394	28.4167	1	0	>sp|P25786|PSA1_HUMAN Proteasome subunit alpha type-1 OS=Homo sapiens GN=PSMA1 PE=1 SV=1
1.32193	0	2.71882	0	3.08746	3.12928	0.319451	0.686745	3	1	1.33298	22.3333	2	0	>sp|P25787|PSA2_HUMAN Proteasome subunit alpha type-2 OS=Homo sapiens GN=PSMA2 PE=1 SV=2
0	0	2.71882	0	1.80735	2.11548	0.492759	0.812589	2	1	0.803565	11.4167	1	0	>sp|P25788|PSA3_HUMAN Proteasome subunit alpha type-3 OS=Homo sapiens GN=PSMA3 PE=1 SV=2
0	0	2.22239	2.02975	0	2.70044	0.489245	0.809967	1	2	-0.835932	12.25	2	0	>sp|P25789|PSA4_HUMAN Proteasome subunit alpha type-4 OS=Homo sapiens GN=PSMA4 PE=1 SV=1
0	0	0	1.27302	2.32193	0	0.712243	0.928975	1	1	0.349637	5.41667	1	0	>sp|P26038|MOES_HUMAN Moesin OS=Homo sapiens GN=MSN PE=1 SV=3
0	0	0	0	0.938599	0	0.373901	0.686745	1	0	0.312866	0.916667	1	0	>sp|P26196|DDX6_HUMAN Probable ATP-dependent RNA helicase DDX6 OS=Homo sapiens GN=DDX6 PE=1 SV=2
0	0	0.5025	0	0	0	0.373901	0.686745	1	0	0.1675	0.416667	1	0	>sp|P26368|U2AF2_HUMAN Splicing factor U2AF 65 kDa subunit OS=Homo sapiens GN=U2AF2 PE=1 SV=4
0	0	1.73697	0.736966	3.47032	0	0.222066	0.686745	2	1	1.49011	13.0833	1	0	>sp|P26373|RL13_HUMAN 60S ribosomal protein L13 OS=Homo sapiens GN=RPL13 PE=1 SV=4
0	0.736966	0	0	0	0.662965	0.117227	0.686745	0	2	-0.466644	1.25	3	0.00118835	>sp|P26378|ELAV4_HUMAN ELAV-like protein 4 OS=Homo sapiens GN=ELAVL4 PE=1 SV=2
1.32193	1.36923	2.70044	0	1.05889	1.77259	0.431356	0.754424	3	2	0.646479	12.0833	2	0	>sp|P26440|IVD_HUMAN Isovaleryl-CoA dehydrogenase, mitochondrial OS=Homo sapiens GN=IVD PE=1 SV=1
0	0	0.5025	0	2	0	0.237257	0.686745	2	0	0.834167	3.41667	2	0	>sp|P26599|PTBP1_HUMAN Polypyrimidine tract-binding protein 1 OS=Homo sapiens GN=PTBP1 PE=1 SV=1
0.807355	0	0	0	0	0	0.373901	0.686745	1	0	0.269118	0.75	1	0	>sp|P26639|SYTC_HUMAN Threonine--tRNA ligase, cytoplasmic OS=Homo sapiens GN=TARS PE=1 SV=3
4.11894	3.02237	3.32193	3.73697	0	0	0.90036	0.972756	2	2	0.227179	44.8333	1	0	>sp|P26640|SYVC_HUMAN Valine--tRNA ligase OS=Homo sapiens GN=VARS PE=1 SV=4
0	0	0	0	0	0	NaN	NaN	0	0	0	0	1	0	>sp|P26641|EF1G_HUMAN Elongation factor 1-gamma OS=Homo sapiens GN=EEF1G PE=1 SV=3
0	0	0	0	1.05889	2.34577	0.643322	0.888473	1	1	-0.42896	5.16667	1	0	>sp|P27144|KAD4_HUMAN Adenylate kinase 4, mitochondrial OS=Homo sapiens GN=AK4 PE=1 SV=1
0	0	1.9386	0	0	0	0.373901	0.686745	1	0	0.6462	2.83333	1	0	>sp|P27348|1433T_HUMAN 14-3-3 protein theta OS=Homo sapiens GN=YWHAQ PE=1 SV=1
0	0	1.11548	0	0.938599	2.02975	0.991997	0.997782	2	1	0.00810978	5.16667	2	0	>sp|P27361|MK03_HUMAN Mitogen-activated protein kinase 3 OS=Homo sapiens GN=MAPK3 PE=1 SV=4
0	0.736966	0	0	0	0	0.373901	0.686745	0	1	-0.245655	0.666667	1	0	>sp|P27482|CALL3_HUMAN Calmodulin-like protein 3 OS=Homo sapiens GN=CALML3 PE=1 SV=2
1.32193	1.27302	0.321928	0	1.62449	2.34577	0.888757	0.972756	3	2	-0.116815	9.33333	1	0	>sp|P27540|ARNT_HUMAN Aryl hydrocarbon receptor nuclear translocator OS=Homo sapiens GN=ARNT PE=1 SV=1
0	0	0	0	0	0	NaN	NaN	0	0	0	0	2	0	>sp|P27635|RL10_HUMAN 60S ribosomal protein L10 OS=Homo sapiens GN=RPL10 PE=1 SV=4
0.807355	0	3.24793	0	0	0	0.238412	0.686745	2	0	1.35176	9.25	1	0	>sp|P27694|RFA1_HUMAN Replication protein A 70 kDa DNA-binding subunit OS=Homo sapiens GN=RPA1 PE=1 SV=2
0	0	0	0	0	0	NaN	NaN	0	0	0	0	2	0	>sp|P27695|APEX1_HUMAN DNA-(apurinic or apyrimidinic site) lyase OS=Homo sapiens GN=APEX1 PE=1 SV=2
0	0	1.8413	1.77259	0	3.24793	0.398283	0.715196	1	2	-1.05974	13.5	1	0	>sp|P27707|DCK_HUMAN Deoxycytidine kinase OS=Homo sapiens GN=DCK PE=1 SV=1
4.53916	0	0	0	0	0	0.373901	0.686745	1	0	1.51305	22.25	1	0	>sp|P27708|PYR1_HUMAN CAD protein OS=Homo sapiens GN=CAD PE=1 SV=3
0	0	0	0	0	0	NaN	NaN	0	0	0	0	1	0	>sp|P27816|MAP4_HUMAN Microtubule-associated protein 4 OS=Homo sapiens GN=MAP4 PE=1 SV=3
0	0	0	0	2.52356	0	0.373901	0.686745	1	0	0.841187	4.75	1	0	>sp|P27824|CALX_HUMAN Calnexin OS=Homo sapiens GN=CANX PE=1 SV=2
0.662965	0	0	0	0	0.874469	0.856555	0.964759	1	1	-0.0705014	1.41667	1	0	>sp|P27986|P85A_HUMAN Phosphatidylinositol 3-kinase regulatory subunit alpha OS=Homo sapiens GN=PIK3R1 PE=1 SV=2
0	0	0	0	1.05889	0	0.373901	0.686745	1	0	0.352965	1.08333	2	0	>sp|P28062|PSB8_HUMAN Proteasome subunit beta type-8 OS=Homo sapiens GN=PSMB8 PE=1 SV=3
0	0	0	0	1.62449	0.662965	0.612829	0.878706	1	1	0.320509	2.66667	2	0	>sp|P28065|PSB9_HUMAN Proteasome subunit beta type-9 OS=Homo sapiens GN=PSMB9 PE=1 SV=2
0.938599	0	3.24793	1	3.05889	2.75489	0.347385	0.686745	3	2	1.16351	23.5	1	0	>sp|P28066|PSA5_HUMAN Proteasome subunit alpha type-5 OS=Homo sapiens GN=PSMA5 PE=1 SV=3
1.5025	0.662965	1.8413	1.77259	2.32193	3.77259	0.856902	0.964797	3	3	-0.180804	24.0833	1	0	>sp|P28070|PSB4_HUMAN Proteasome subunit beta type-4 OS=Homo sapiens GN=PSMB4 PE=1 SV=4
0	0	0.5025	0	1.05889	1.77259	0.920825	0.972756	2	1	-0.0703985	3.91667	1	0	>sp|P28072|PSB6_HUMAN Proteasome subunit beta type-6 OS=Homo sapiens GN=PSMB6 PE=1 SV=4
0	0	1.11548	0	2.32193	3.24793	0.962821	0.986145	2	1	0.0631593	13.6667	1	0	>sp|P28074|PSB5_HUMAN Proteasome subunit beta type-5 OS=Homo sapiens GN=PSMB5 PE=1 SV=3
0	0	0	0	0	0.584963	0.373901	0.686745	0	1	-0.194988	0.5	2	0	>sp|P28161|GSTM2_HUMAN Glutathione S-transferase Mu 2 OS=Homo sapiens GN=GSTM2 PE=1 SV=2
0.321928	0	0	0	0	0	0.373901	0.686745	1	0	0.107309	0.25	1	0	>sp|P28288|ABCD3_HUMAN ATP-binding cassette sub-family D member 3 OS=Homo sapiens GN=ABCD3 PE=1 SV=1
1.73697	0.222392	2.70044	0	0	0	0.151368	0.686745	2	1	1.405	8	2	0	>sp|P28331|NDUS1_HUMAN NADH-ubiquinone oxidoreductase 75 kDa subunit, mitochondrial OS=Homo sapiens GN=NDUFS1 PE=1 SV=3
3.94642	2.88264	1.96963	4.35168	2.14296	3.1964	0.364768	0.686745	3	3	-0.790571	54.7083	2	0	>sp|P28340|DPOD1_HUMAN DNA polymerase delta catalytic subunit OS=Homo sapiens GN=POLD1 PE=1 SV=2
0	0	0	1.77259	0	0	0.373901	0.686745	0	1	-0.590863	2.41667	3	0	>sp|P28370|SMCA1_HUMAN Probable global transcription activator SNF2L1 OS=Homo sapiens GN=SMARCA1 PE=1 SV=2
0	0	0	0	0	2.02975	0.373901	0.686745	0	1	-0.676582	3.08333	1	0	>sp|P28482|MK01_HUMAN Mitogen-activated protein kinase 1 OS=Homo sapiens GN=MAPK1 PE=1 SV=3
0	0.222392	2.05889	0	2.52356	0	0.135497	0.686745	2	1	1.45335	8.08333	1	0	>sp|P28838|AMPL_HUMAN Cytosol aminopeptidase OS=Homo sapiens GN=LAP3 PE=1 SV=3
0	0	0	0	0	0	NaN	NaN	0	0	0	0	2	0	>sp|P29084|T2EB_HUMAN Transcription initiation factor IIE subunit beta OS=Homo sapiens GN=GTF2E2 PE=1 SV=1
0	1.5025	0	0	0	0	0.373901	0.686745	0	1	-0.500833	1.83333	2	0	>sp|P29144|TPP2_HUMAN Tripeptidyl-peptidase 2 OS=Homo sapiens GN=TPP2 PE=1 SV=4
0	0	0	0	0	0	NaN	NaN	0	0	0	0	1	0	>sp|P29218|IMPA1_HUMAN Inositol monophosphatase 1 OS=Homo sapiens GN=IMPA1 PE=1 SV=1
0	0	0	0	0	0.662965	0.373901	0.686745	0	1	-0.220988	0.583333	2	0	>sp|P29350|PTN6_HUMAN Tyrosine-protein phosphatase non-receptor type 6 OS=Homo sapiens GN=PTPN6 PE=1 SV=1
0.321928	0.736966	1.73697	1.27302	1.87447	0	0.358385	0.686745	3	2	0.641126	7.33333	2	0	>sp|P29401|TKT_HUMAN Transketolase OS=Homo sapiens GN=TKT PE=1 SV=3
0	0	0	0	0	0.662965	0.373901	0.686745	0	1	-0.220988	0.583333	2	0.00324324	>sp|P29466|CASP1_HUMAN Caspase-1 OS=Homo sapiens GN=CASP1 PE=1 SV=1
1.77259	0	1.11548	1.77259	0	2.70044	0.606356	0.877144	2	2	-0.528321	11.5	1	0	>sp|P29508|SPB3_HUMAN Serpin B3 OS=Homo sapiens GN=SERPINB3 PE=1 SV=2
0	1.27302	3.11548	2.02975	0	1.77259	0.571723	0.860399	1	3	-0.653293	14.5833	1	0	>sp|P29590|PML_HUMAN Protein PML OS=Homo sapiens GN=PML PE=1 SV=3
2.34577	2.05889	0.662965	0	1.80735	2.36923	0.891955	0.972756	3	2	0.129322	14.5	2	0	>sp|P29692|EF1D_HUMAN Elongation factor 1-delta OS=Homo sapiens GN=EEF1D PE=1 SV=5
0	0	0	0	0.415037	0	0.373901	0.686745	1	0	0.138346	0.333333	2	0.00175593	>sp|P29728|OAS2_HUMAN 2'-5'-oligoadenylate synthase 2 OS=Homo sapiens GN=OAS2 PE=1 SV=3
0	0	0	0	2.52356	0	0.373901	0.686745	1	0	0.841187	4.75	2	0	>sp|P29966|MARCS_HUMAN Myristoylated alanine-rich C-kinase substrate OS=Homo sapiens GN=MARCKS PE=1 SV=4
0.321928	0	0	0	2.52356	0	0.297713	0.686745	2	0	0.948497	5	1	0	>sp|P30040|ERP29_HUMAN Endoplasmic reticulum resident protein 29 OS=Homo sapiens GN=ERP29 PE=1 SV=4
0	0	0	0	1.05889	3.11548	0.565853	0.857583	1	1	-0.685528	8.75	1	0	>sp|P30041|PRDX6_HUMAN Peroxiredoxin-6 OS=Homo sapiens GN=PRDX6 PE=1 SV=3
0	0	0	0	1.62449	1.22239	0.85286	0.964759	1	1	0.134033	3.41667	1	0	>sp|P30048|PRDX3_HUMAN Thioredoxin-dependent peroxide reductase, mitochondrial OS=Homo sapiens GN=PRDX3 PE=1 SV=3
0	0	0	0	1.05889	0	0.373901	0.686745	1	0	0.352965	1.08333	1	0	>sp|P30050|RL12_HUMAN 60S ribosomal protein L12 OS=Homo sapiens GN=RPL12 PE=1 SV=1
0.874469	0	0	0	0.415037	0.5025	0.435506	0.759105	2	1	0.262335	1.58333	1	0	>sp|P30084|ECHM_HUMAN Enoyl-CoA hydratase, mitochondrial OS=Homo sapiens GN=ECHS1 PE=1 SV=4
0	0	0	0	2	0	0.373901	0.686745	1	0	0.666667	3	1	0	>sp|P30085|KCY_HUMAN UMP-CMP kinase OS=Homo sapiens GN=CMPK1 PE=1 SV=3
0	0	0	0	0.415037	0	0.373901	0.686745	1	0	0.138346	0.333333	1	0	>sp|P30086|PEBP1_HUMAN Phosphatidylethanolamine-binding protein 1 OS=Homo sapiens GN=PEBP1 PE=1 SV=3
1.77259	0	1.11548	1.27302	2.73697	0	0.0839864	0.686745	3	1	1.45067	10.6667	1	0	>sp|P30101|PDIA3_HUMAN Protein disulfide-isomerase A3 OS=Homo sapiens GN=PDIA3 PE=1 SV=4
0	0	0	1	0	0	0.373901	0.686745	0	1	-0.333333	1	2	0	>sp|P30153|2AAA_HUMAN Serine/threonine-protein phosphatase 2A 65 kDa regulatory subunit A alpha isoform OS=Homo sapiens GN=PPP2R1A PE=1 SV=4
0	0	1.73697	0.736966	0	0	0.624175	0.878706	1	1	0.333333	3	1	0	>sp|P30154|2AAB_HUMAN Serine/threonine-protein phosphatase 2A 65 kDa regulatory subunit A beta isoform OS=Homo sapiens GN=PPP2R1B PE=1 SV=3
0	0	0	0	0	0	NaN	NaN	0	0	0	0	3	0	>sp|P30260|CDC27_HUMAN Cell division cycle protein 27 homolog OS=Homo sapiens GN=CDC27 PE=1 SV=2
0	0	0	0.736966	0	0	0.373901	0.686745	0	1	-0.245655	0.666667	2	0.00586081	>sp|P30291|WEE1_HUMAN Wee1-like protein kinase OS=Homo sapiens GN=WEE1 PE=1 SV=2
0	0	0	0	0.736966	0.807355	0.951747	0.980796	1	1	-0.0234631	1.41667	2	0	>sp|P30443|1A01_HUMAN HLA class I histocompatibility antigen, A-1 alpha chain OS=Homo sapiens GN=HLA-A PE=1 SV=1
0	2.73697	0	0	0	0.807355	0.219337	0.686745	0	2	-1.18144	6.41667	2	0	>sp|P30447|1A23_HUMAN HLA class I histocompatibility antigen, A-23 alpha chain OS=Homo sapiens GN=HLA-A PE=1 SV=1
0	1.90689	0	0	0	0.807355	0.176932	0.686745	0	2	-0.904749	3.5	2	0	>sp|P30450|1A26_HUMAN HLA class I histocompatibility antigen, A-26 alpha chain OS=Homo sapiens GN=HLA-A PE=1 SV=2
0	1.90689	0	0	0	0	0.373901	0.686745	0	1	-0.63563	2.75	2	0	>sp|P30453|1A34_HUMAN HLA class I histocompatibility antigen, A-34 alpha chain OS=Homo sapiens GN=HLA-A PE=1 SV=1
0	0	0	0	0.736966	0.807355	0.951747	0.980796	1	1	-0.0234631	1.41667	2	0	>sp|P30455|1A36_HUMAN HLA class I histocompatibility antigen, A-36 alpha chain OS=Homo sapiens GN=HLA-A PE=1 SV=1
0	1.90689	0	0	0	0.807355	0.176932	0.686745	0	2	-0.904749	3.5	2	0	>sp|P30456|1A43_HUMAN HLA class I histocompatibility antigen, A-43 alpha chain OS=Homo sapiens GN=HLA-A PE=1 SV=1
0	1.90689	0	0	0	0.807355	0.176932	0.686745	0	2	-0.904749	3.5	2	0	>sp|P30457|1A66_HUMAN HLA class I histocompatibility antigen, A-66 alpha chain OS=Homo sapiens GN=HLA-A PE=1 SV=1
0	1.05889	0	0	0.736966	0	0.815237	0.948525	1	1	-0.107309	1.75	2	0	>sp|P30459|1A74_HUMAN HLA class I histocompatibility antigen, A-74 alpha chain OS=Homo sapiens GN=HLA-A PE=1 SV=1
0	0	0	1.5025	2.32193	0	0.781757	0.946366	1	1	0.273143	5.83333	1	0	>sp|P30460|1B08_HUMAN HLA class I histocompatibility antigen, B-8 alpha chain OS=Homo sapiens GN=HLA-B PE=1 SV=1
0	0	0	0	1.62449	0	0.373901	0.686745	1	0	0.541497	2.08333	3	0	>sp|P30461|1B13_HUMAN HLA class I histocompatibility antigen, B-13 alpha chain OS=Homo sapiens GN=HLA-B PE=1 SV=1
0	0.222392	0	0.115477	2.32193	0	0.442437	0.765227	1	2	0.661353	4.25	2	0	>sp|P30462|1B14_HUMAN HLA class I histocompatibility antigen, B-14 alpha chain OS=Homo sapiens GN=HLA-B PE=1 SV=1
0	0.70044	0	0	0	0.807355	0.118113	0.686745	0	2	-0.502598	1.375	2	0	>sp|P30464|1B15_HUMAN HLA class I histocompatibility antigen, B-15 alpha chain OS=Homo sapiens GN=HLA-B PE=1 SV=2
0	0.222392	0	0	1.62449	0	0.440678	0.763759	1	1	0.467366	2.25	1	0	>sp|P30466|1B18_HUMAN HLA class I histocompatibility antigen, B-18 alpha chain OS=Homo sapiens GN=HLA-B PE=1 SV=1
0	0.938599	0	0	2	0.874469	0.93627	0.973856	1	2	0.0623105	4.75	2	0	>sp|P30475|1B39_HUMAN HLA class I histocompatibility antigen, B-39 alpha chain OS=Homo sapiens GN=HLA-B PE=1 SV=1
0	0	0	1.5025	0	0	0.373901	0.686745	0	1	-0.500833	1.83333	2	0	>sp|P30479|1B41_HUMAN HLA class I histocompatibility antigen, B-41 alpha chain OS=Homo sapiens GN=HLA-B PE=1 SV=1
0	0	0	1.5025	2.32193	0	0.781757	0.946366	1	1	0.273143	5.83333	2	0	>sp|P30480|1B42_HUMAN HLA class I histocompatibility antigen, B-42 alpha chain OS=Homo sapiens GN=HLA-B PE=1 SV=1
0	0.938599	0	0	0	0	0.373901	0.686745	0	1	-0.312866	0.916667	1	0	>sp|P30481|1B44_HUMAN HLA class I histocompatibility antigen, B-44 alpha chain OS=Homo sapiens GN=HLA-B PE=1 SV=1
0	0.222392	0	0	0	0	0.373901	0.686745	0	1	-0.0741308	0.166667	2	0	>sp|P30483|1B45_HUMAN HLA class I histocompatibility antigen, B-45 alpha chain OS=Homo sapiens GN=HLA-B PE=1 SV=1
0	0.70044	0	0	0	1.45943	0.16274	0.686745	0	2	-0.719957	2.375	2	0	>sp|P30484|1B46_HUMAN HLA class I histocompatibility antigen, B-46 alpha chain OS=Homo sapiens GN=HLA-B PE=1 SV=1
0	0	0	0	0	0	NaN	NaN	0	0	0	0	2	0	>sp|P30485|1B47_HUMAN HLA class I histocompatibility antigen, B-47 alpha chain OS=Homo sapiens GN=HLA-B PE=1 SV=1
0	0.584963	0	0.115477	2	0	0.564323	0.857016	1	2	0.433187	3.58333	2	0	>sp|P30486|1B48_HUMAN HLA class I histocompatibility antigen, B-48 alpha chain OS=Homo sapiens GN=HLA-B PE=1 SV=1
0	0.222392	0	0	0	0	0.373901	0.686745	0	1	-0.0741308	0.166667	2	0	>sp|P30487|1B49_HUMAN HLA class I histocompatibility antigen, B-49 alpha chain OS=Homo sapiens GN=HLA-B PE=1 SV=2
0	0.222392	0	0	0	0	0.373901	0.686745	0	1	-0.0741308	0.166667	2	0	>sp|P30488|1B50_HUMAN HLA class I histocompatibility antigen, B-50 alpha chain OS=Homo sapiens GN=HLA-B PE=1 SV=1
0	0	0	0	0	0	NaN	NaN	0	0	0	0	2	0	>sp|P30490|1B52_HUMAN HLA class I histocompatibility antigen, B-52 alpha chain OS=Homo sapiens GN=HLA-B PE=1 SV=1
0	0	0	0	0	0.807355	0.373901	0.686745	0	1	-0.269118	0.75	2	0	>sp|P30491|1B53_HUMAN HLA class I histocompatibility antigen, B-53 alpha chain OS=Homo sapiens GN=HLA-B PE=1 SV=1
0	0	0	0	0	0	NaN	NaN	0	0	0	0	2	0	>sp|P30492|1B54_HUMAN HLA class I histocompatibility antigen, B-54 alpha chain OS=Homo sapiens GN=HLA-B PE=1 SV=1
0	0	0	0	0	0	NaN	NaN	0	0	0	0	2	0	>sp|P30493|1B55_HUMAN HLA class I histocompatibility antigen, B-55 alpha chain OS=Homo sapiens GN=HLA-B PE=1 SV=1
0	0	0	0	0	0.807355	0.373901	0.686745	0	1	-0.269118	0.75	2	0	>sp|P30495|1B56_HUMAN HLA class I histocompatibility antigen, B-56 alpha chain OS=Homo sapiens GN=HLA-B PE=1 SV=1
0	0	0	0	0	0	NaN	NaN	0	0	0	0	2	0	>sp|P30498|1B78_HUMAN HLA class I histocompatibility antigen, B-78 alpha chain OS=Homo sapiens GN=HLA-B PE=1 SV=1
0	0	1.11548	1.77259	1.62449	0	0.693586	0.91983	2	1	0.32246	5.66667	2	0	>sp|P30499|1C01_HUMAN HLA class I histocompatibility antigen, Cw-1 alpha chain OS=Homo sapiens GN=HLA-C PE=1 SV=1
0	0.222392	0	0	2.32193	0	0.418957	0.739821	1	1	0.699845	4.16667	3	0	>sp|P30501|1C02_HUMAN HLA class I histocompatibility antigen, Cw-2 alpha chain OS=Homo sapiens GN=HLA-C PE=1 SV=1
0	0	0	0	0	0.5025	0.373901	0.686745	0	1	-0.1675	0.416667	3	0	>sp|P30504|1C04_HUMAN HLA class I histocompatibility antigen, Cw-4 alpha chain OS=Homo sapiens GN=HLA-C PE=1 SV=1
0	0.222392	0	0	2	0	0.426938	0.74851	1	1	0.592536	3.16667	3	0	>sp|P30505|1C08_HUMAN HLA class I histocompatibility antigen, Cw-8 alpha chain OS=Homo sapiens GN=HLA-C PE=1 SV=1
0	0	0	0	0.736966	0.807355	0.951747	0.980796	1	1	-0.0234631	1.41667	2	0	>sp|P30508|1C12_HUMAN HLA class I histocompatibility antigen, Cw-12 alpha chain OS=Homo sapiens GN=HLA-C PE=1 SV=2
0	0	0	0	0	0	NaN	NaN	0	0	0	0	3	0	>sp|P30510|1C14_HUMAN HLA class I histocompatibility antigen, Cw-14 alpha chain OS=Homo sapiens GN=HLA-C PE=1 SV=2
0	1.27302	0	0	0	0.662965	0.154016	0.686745	0	2	-0.645328	2	2	0	>sp|P30511|HLAF_HUMAN HLA class I histocompatibility antigen, alpha chain F OS=Homo sapiens GN=HLA-F PE=2 SV=3
0	1.05889	0	0	0.736966	0	0.815237	0.948525	1	1	-0.107309	1.75	2	0	>sp|P30512|1A29_HUMAN HLA class I histocompatibility antigen, A-29 alpha chain OS=Homo sapiens GN=HLA-A PE=1 SV=2
0.874469	0	0.5025	0	0	0	0.144293	0.686745	2	0	0.45899	1.25	2	0	>sp|P30519|HMOX2_HUMAN Heme oxygenase 2 OS=Homo sapiens GN=HMOX2 PE=1 SV=2
0	0	0	1.45943	2.73697	0.807355	0.883656	0.972507	1	2	0.156726	8.16667	1	0	>sp|P30520|PURA2_HUMAN Adenylosuccinate synthetase isozyme 2 OS=Homo sapiens GN=ADSS PE=1 SV=3
0.321928	2.02975	0	0	0	0	0.452695	0.773057	1	1	-0.569273	3.33333	1	0	>sp|P30566|PUR8_HUMAN Adenylosuccinate lyase OS=Homo sapiens GN=ADSL PE=1 SV=2
0	0	0	0	0.807355	0	0.373901	0.686745	1	0	0.269118	0.75	1	0	>sp|P30613|KPYR_HUMAN Pyruvate kinase PKLR OS=Homo sapiens GN=PKLR PE=1 SV=2
0	0	0	0	0	0.807355	0.373901	0.686745	0	1	-0.269118	0.75	2	0	>sp|P30685|1B35_HUMAN HLA class I histocompatibility antigen, B-35 alpha chain OS=Homo sapiens GN=HLA-B PE=1 SV=1
0	0	0	0	0	0	NaN	NaN	0	0	0	0	1	0	>sp|P30740|ILEU_HUMAN Leukocyte elastase inhibitor OS=Homo sapiens GN=SERPINB1 PE=1 SV=1
0	0	0	0.736966	0	0	0.373901	0.686745	0	1	-0.245655	0.666667	1	0.00884956	>sp|P30825|CTR1_HUMAN High affinity cationic amino acid transporter 1 OS=Homo sapiens GN=SLC7A1 PE=1 SV=1
0	1.27302	1.73697	1.27302	1.05889	0	0.905674	0.972756	2	2	0.0832741	6.25	1	0	>sp|P30837|AL1B1_HUMAN Aldehyde dehydrogenase X, mitochondrial OS=Homo sapiens GN=ALDH1B1 PE=1 SV=3
0	0	0	0	2	0	0.373901	0.686745	1	0	0.666667	3	2	0	>sp|P30876|RPB2_HUMAN DNA-directed RNA polymerase II subunit RPB2 OS=Homo sapiens GN=POLR2B PE=1 SV=1
0	0	0	0	0	0	NaN	NaN	0	0	0	0	1	0	>sp|P31025|LCN1_HUMAN Lipocalin-1 OS=Homo sapiens GN=LCN1 PE=1 SV=1
0	0	0	0	0	0	NaN	NaN	0	0	0	0	2	0	>sp|P31040|SDHA_HUMAN Succinate dehydrogenase [ubiquinone] flavoprotein subunit, mitochondrial OS=Homo sapiens GN=SDHA PE=1 SV=2
0	0	0	0	0	1.58496	0.373901	0.686745	0	1	-0.528321	2	1	0	>sp|P31146|COR1A_HUMAN Coronin-1A OS=Homo sapiens GN=CORO1A PE=1 SV=4
0	0	0	0	0	0	NaN	NaN	0	0	0	0	1	0	>sp|P31150|GDIA_HUMAN Rab GDP dissociation inhibitor alpha OS=Homo sapiens GN=GDI1 PE=1 SV=2
0	1.77259	0	0	1.8413	0	0.97984	0.992155	1	1	0.0229043	5	1	0	>sp|P31151|S10A7_HUMAN Protein S100-A7 OS=Homo sapiens GN=S100A7 PE=1 SV=4
0	0	0	0	0	0	NaN	NaN	0	0	0	0	1	0	>sp|P31153|METK2_HUMAN S-adenosylmethionine synthase isoform type-2 OS=Homo sapiens GN=MAT2A PE=1 SV=1
0	0.222392	0.662965	1.8413	0	0	0.4939	0.813961	1	2	-0.46691	3.33333	1	0	>sp|P31350|RIR2_HUMAN Ribonucleoside-diphosphate reductase subunit M2 OS=Homo sapiens GN=RRM2 PE=1 SV=1
0	0	1.11548	0	1.05889	1.27302	0.618999	0.878706	2	1	0.300451	3.66667	2	0	>sp|P31483|TIA1_HUMAN Nucleolysin TIA-1 isoform p40 OS=Homo sapiens GN=TIA1 PE=1 SV=3
0	0	0	0	0	0	NaN	NaN	0	0	0	0	1	0	>sp|P31689|DNJA1_HUMAN DnaJ homolog subfamily A member 1 OS=Homo sapiens GN=DNAJA1 PE=1 SV=2
0	0	0	0	0	0	NaN	NaN	0	0	0	0	1	0.00930233	>sp|P31930|QCR1_HUMAN Cytochrome b-c1 complex subunit 1, mitochondrial OS=Homo sapiens GN=UQCRC1 PE=1 SV=3
0	0	0	0	0	0	NaN	NaN	0	0	0	0	1	0	>sp|P31937|3HIDH_HUMAN 3-hydroxyisobutyrate dehydrogenase, mitochondrial OS=Homo sapiens GN=HIBADH PE=1 SV=2
0	0	1.73697	0	2.32193	0	0.124312	0.686745	2	0	1.35296	6.33333	1	0	>sp|P31939|PUR9_HUMAN Bifunctional purine biosynthesis protein PURH OS=Homo sapiens GN=ATIC PE=1 SV=3
3.34577	3.42626	3.78136	1.8413	2.32193	1.41504	0.285875	0.686745	3	3	0.922153	39.9167	1	0	>sp|P31942|HNRH3_HUMAN Heterogeneous nuclear ribonucleoprotein H3 OS=Homo sapiens GN=HNRNPH3 PE=1 SV=2
0	0	2.68182	0	2.22239	2.75489	0.593379	0.874881	2	1	0.716443	14.8333	2	0	>sp|P31943|HNRH1_HUMAN Heterogeneous nuclear ribonucleoprotein H OS=Homo sapiens GN=HNRNPH1 PE=1 SV=4
0	0	0	0	0	0	NaN	NaN	0	0	0	0	1	0	>sp|P31944|CASPE_HUMAN Caspase-14 OS=Homo sapiens GN=CASP14 PE=1 SV=2
0	0	2.92283	0	0	0	0.373901	0.686745	1	0	0.974277	6.58333	1	0	>sp|P31946|1433B_HUMAN 14-3-3 protein beta/alpha OS=Homo sapiens GN=YWHAB PE=1 SV=3
0	0	0.321928	2.43741	0	2.1964	0.14024	0.686745	1	2	-1.43729	8.25	1	0	>sp|P31947|1433S_HUMAN 14-3-3 protein sigma OS=Homo sapiens GN=SFN PE=1 SV=1
0	0	0	0.736966	2.73697	0	0.519358	0.831305	1	1	0.666667	6.33333	1	0	>sp|P31948|STIP1_HUMAN Stress-induced-phosphoprotein 1 OS=Homo sapiens GN=STIP1 PE=1 SV=1
0	0	0	0	0	3.12928	0.373901	0.686745	0	1	-1.04309	7.75	1	0	>sp|P32119|PRDX2_HUMAN Peroxiredoxin-2 OS=Homo sapiens GN=PRDX2 PE=1 SV=5
0	0	0	0.736966	0	0	0.373901	0.686745	0	1	-0.245655	0.666667	2	0	>sp|P32248|CCR7_HUMAN C-C chemokine receptor type 7 OS=Homo sapiens GN=CCR7 PE=2 SV=2
0	0	0	2.1964	2.66297	2.96963	0.543026	0.851316	1	2	-0.834353	15.75	2	0	>sp|P32322|P5CR1_HUMAN Pyrroline-5-carboxylate reductase 1, mitochondrial OS=Homo sapiens GN=PYCR1 PE=1 SV=2
0	0	1.11548	2.34577	0	2.02975	0.257501	0.686745	1	2	-1.08668	8.33333	1	0	>sp|P32519|ELF1_HUMAN ETS-related transcription factor Elf-1 OS=Homo sapiens GN=ELF1 PE=1 SV=2
0	0	0	0	1.05889	1.27302	0.903351	0.972756	1	1	-0.0713749	2.5	2	0	>sp|P32969|RL9_HUMAN 60S ribosomal protein L9 OS=Homo sapiens GN=RPL9 PE=1 SV=1
3.75489	3.98489	2.8413	2.44846	2.08746	4.75043	0.372655	0.686745	3	3	-0.833376	67.125	2	0	>sp|P33121|ACSL1_HUMAN Long-chain-fatty-acid--CoA ligase 1 OS=Homo sapiens GN=ACSL1 PE=1 SV=1
2.80735	2.41504	0	1.58496	1.11548	3.14296	0.313588	0.686745	2	3	-1.07338	21.3333	1	0	>sp|P33176|KINH_HUMAN Kinesin-1 heavy chain OS=Homo sapiens GN=KIF5B PE=1 SV=1
0	2.02975	0	0.115477	2	0	0.961267	0.985048	1	2	-0.0484082	6.16667	2	0	>sp|P33240|CSTF2_HUMAN Cleavage stimulation factor subunit 2 OS=Homo sapiens GN=CSTF2 PE=1 SV=1
2.54432	3.02975	2.14296	3.51307	2	0	0.967516	0.988751	3	2	0.0481538	28.8333	1	0	>sp|P33527|MRP1_HUMAN Multidrug resistance-associated protein 1 OS=Homo sapiens GN=ABCC1 PE=1 SV=3
0	0	1.11548	2.54432	3.22239	0	0.662249	0.903114	2	1	0.59785	14.3333	2	0	>sp|P33778|H2B1B_HUMAN Histone H2B type 1-B OS=Homo sapiens GN=HIST1H2BB PE=1 SV=2
0	0	0.115477	1.96963	0	2.02975	0.124611	0.686745	1	2	-1.29463	6.08333	1	0	>sp|P33897|ABCD1_HUMAN ATP-binding cassette sub-family D member 1 OS=Homo sapiens GN=ABCD1 PE=1 SV=2
1.32193	2.34577	0	0	0	0	0.723094	0.929125	1	1	-0.341282	5.58333	1	0	>sp|P33908|MA1A1_HUMAN Mannosyl-oligosaccharide 1,2-alpha-mannosidase IA OS=Homo sapiens GN=MAN1A1 PE=1 SV=3
3.41504	2.32193	2.36923	2.73697	2.52356	1.77259	0.315506	0.686745	3	3	0.492117	30.6667	1	0	>sp|P33981|TTK_HUMAN Dual specificity protein kinase TTK OS=Homo sapiens GN=TTK PE=1 SV=2
0	0	0	1.11548	0	0	0.373901	0.686745	0	1	-0.371826	1.16667	1	0	>sp|P33991|MCM4_HUMAN DNA replication licensing factor MCM4 OS=Homo sapiens GN=MCM4 PE=1 SV=5
4.64386	3.94251	1.05889	2.08746	0	0.5025	0.880128	0.971961	2	3	-0.276576	43.125	2	0	>sp|P33992|MCM5_HUMAN DNA replication licensing factor MCM5 OS=Homo sapiens GN=MCM5 PE=1 SV=5
2.22239	2.54432	2.96963	0	3.52356	0	0.090976	0.686745	3	1	2.05709	25.8333	1	0	>sp|P33993|MCM7_HUMAN DNA replication licensing factor MCM7 OS=Homo sapiens GN=MCM7 PE=1 SV=4
0	0.736966	1.11548	1.27302	0	0	0.599671	0.874881	1	2	-0.298169	3.25	1	0	>sp|P34896|GLYC_HUMAN Serine hydroxymethyltransferase, cytosolic OS=Homo sapiens GN=SHMT1 PE=1 SV=1
0	0	3.24793	2.48113	3.93074	0	0.346161	0.686745	2	1	1.56585	27.3333	1	0	>sp|P34897|GLYM_HUMAN Serine hydroxymethyltransferase, mitochondrial OS=Homo sapiens GN=SHMT2 PE=1 SV=3
1.77259	0	0	2	3.74147	3.63421	0.980075	0.992155	2	2	-0.0400498	29.2083	1	0	>sp|P34931|HS71L_HUMAN Heat shock 70 kDa protein 1-like OS=Homo sapiens GN=HSPA1L PE=1 SV=2
1.32193	0	1.11548	1.27302	2.73697	0	0.121404	0.686745	3	1	1.30045	9.75	1	0	>sp|P34932|HSP74_HUMAN Heat shock 70 kDa protein 4 OS=Homo sapiens GN=HSPA4 PE=1 SV=4
0	0	0	0	0	0	NaN	NaN	0	0	0	0	1	0	>sp|P35030|TRY3_HUMAN Trypsin-3 OS=Homo sapiens GN=PRSS3 PE=1 SV=2
0	0	2.16993	2.23522	0	3.38082	0.402621	0.720531	1	2	-1.1487	16.625	1	0	>sp|P35232|PHB_HUMAN Prohibitin OS=Homo sapiens GN=PHB PE=1 SV=1
0	0.736966	0	0	0.415037	0	0.722835	0.929125	1	1	-0.107309	1	1	0	>sp|P35241|RADI_HUMAN Radixin OS=Homo sapiens GN=RDX PE=1 SV=1
0	0	2.58496	0	1.11548	3.1964	0.903561	0.972756	2	1	0.168014	14.3333	2	0	>sp|P35249|RFC4_HUMAN Replication factor C subunit 4 OS=Homo sapiens GN=RFC4 PE=1 SV=2
0.807355	0.938599	3.26053	1	0	2.02975	0.976131	0.992155	2	3	0.0331786	14.3333	1	0	>sp|P35250|RFC2_HUMAN Replication factor C subunit 2 OS=Homo sapiens GN=RFC2 PE=1 SV=3
0	0	0	0	1.05889	0	0.373901	0.686745	1	0	0.352965	1.08333	2	0	>sp|P35268|RL22_HUMAN 60S ribosomal protein L22 OS=Homo sapiens GN=RPL22 PE=1 SV=2
4.14636	4.54432	0	7.15777	0	0	0.371863	0.686745	1	2	-2.51858	180.833	1	0	>sp|P35527|K1C9_HUMAN Keratin, type I cytoskeletal 9 OS=Homo sapiens GN=KRT9 PE=1 SV=3
0	0.736966	0.5025	0.736966	0.415037	0	0.557867	0.853691	2	2	-0.185464	2.08333	3	0	>sp|P35558|PCKGC_HUMAN Phosphoenolpyruvate carboxykinase, cytosolic [GTP] OS=Homo sapiens GN=PCK1 PE=1 SV=3
0	0	0	0	0	0	NaN	NaN	0	0	0	0	1	0	>sp|P35573|GDE_HUMAN Glycogen debranching enzyme OS=Homo sapiens GN=AGL PE=1 SV=3
0	0	3.47032	0	0	0	0.373901	0.686745	1	0	1.15677	10.0833	1	0	>sp|P35579|MYH9_HUMAN Myosin-9 OS=Homo sapiens GN=MYH9 PE=1 SV=4
0	1.27302	0	0	0	0	0.373901	0.686745	0	1	-0.424339	1.41667	1	0	>sp|P35580|MYH10_HUMAN Myosin-10 OS=Homo sapiens GN=MYH10 PE=1 SV=3
1.62449	0	0	0	1.62449	0	0.116117	0.686745	2	0	1.08299	4.16667	1	0	>sp|P35606|COPB2_HUMAN Coatomer subunit beta' OS=Homo sapiens GN=COPB2 PE=1 SV=2
0	0	0	0.736966	0	0	0.373901	0.686745	0	1	-0.245655	0.666667	1	0	>sp|P35609|ACTN2_HUMAN Alpha-actinin-2 OS=Homo sapiens GN=ACTN2 PE=1 SV=1
0	0	0.5025	0	0	0	0.373901	0.686745	1	0	0.1675	0.416667	1	0.00872093	>sp|P35610|SOAT1_HUMAN Sterol O-acyltransferase 1 OS=Homo sapiens GN=SOAT1 PE=1 SV=3
0	0.222392	0	0	0	0	0.373901	0.686745	0	1	-0.0741308	0.166667	2	0	>sp|P35611|ADDA_HUMAN Alpha-adducin OS=Homo sapiens GN=ADD1 PE=1 SV=2
0.321928	0.736966	0	0.736966	0	0	0.225286	0.686745	1	2	-0.384001	1.58333	3	0	>sp|P35612|ADDB_HUMAN Beta-adducin OS=Homo sapiens GN=ADD2 PE=1 SV=3
0.321928	0	0	0	1.62449	0	0.261452	0.686745	2	0	0.648806	2.33333	2	0	>sp|P35613|BASI_HUMAN Basigin OS=Homo sapiens GN=BSG PE=1 SV=2
0	0	0	0	0	0	NaN	NaN	0	0	0	0	1	0	>sp|P35637|FUS_HUMAN RNA-binding protein FUS OS=Homo sapiens GN=FUS PE=1 SV=1
5.30073	5.37504	5.50779	5.20945	5.14975	4.75043	0.385979	0.700388	3	3	0.207785	219.833	1	0	>sp|P35658|NU214_HUMAN Nuclear pore complex protein Nup214 OS=Homo sapiens GN=NUP214 PE=1 SV=2
1.77259	0	0	0	0	0	0.373901	0.686745	1	0	0.590863	2.41667	2	0.00325468	>sp|P35659|DEK_HUMAN Protein DEK OS=Homo sapiens GN=DEK PE=1 SV=1
0	2.05889	0	2.02975	0	0	0.116137	0.686745	0	2	-1.36288	6.25	1	0	>sp|P35749|MYH11_HUMAN Myosin-11 OS=Homo sapiens GN=MYH11 PE=1 SV=3
0	0	0	0	2	0	0.373901	0.686745	1	0	0.666667	3	1	0	>sp|P35754|GLRX1_HUMAN Glutaredoxin-1 OS=Homo sapiens GN=GLRX PE=1 SV=2
0	0	0	0	0	0	NaN	NaN	0	0	0	0	1	0	>sp|P35813|PPM1A_HUMAN Protein phosphatase 1A OS=Homo sapiens GN=PPM1A PE=1 SV=1
0	0	0	0	0	0	NaN	NaN	0	0	0	0	2	0	>sp|P35900|K1C20_HUMAN Keratin, type I cytoskeletal 20 OS=Homo sapiens GN=KRT20 PE=1 SV=1
6.60486	5.66297	5.9386	0	3.48113	0	0.177504	0.686745	3	1	3.45387	216.5	1	0	>sp|P35908|K22E_HUMAN Keratin, type II cytoskeletal 2 epidermal OS=Homo sapiens GN=KRT2 PE=1 SV=2
0	0	0.5025	0	0	0	0.373901	0.686745	1	0	0.1675	0.416667	1	0	>sp|P35914|HMGCL_HUMAN Hydroxymethylglutaryl-CoA lyase, mitochondrial OS=Homo sapiens GN=HMGCL PE=1 SV=2
2.39232	0	0.115477	2	4.80735	4.65821	0.914332	0.972756	3	2	0.218979	58.5833	1	0	>sp|P35998|PRS7_HUMAN 26S protease regulatory subunit 7 OS=Homo sapiens GN=PSMC2 PE=1 SV=3
0	0	0	0	0.415037	0.662965	0.767116	0.940709	1	1	-0.0826425	0.916667	1	0	>sp|P36405|ARL3_HUMAN ADP-ribosylation factor-like protein 3 OS=Homo sapiens GN=ARL3 PE=1 SV=2
0	0	0	0	0.415037	0	0.373901	0.686745	1	0	0.138346	0.333333	4	0	>sp|P36406|TRI23_HUMAN E3 ubiquitin-protein ligase TRIM23 OS=Homo sapiens GN=TRIM23 PE=1 SV=1
0	0	0	0	2	1.22239	0.756735	0.940709	1	1	0.259203	4.33333	1	0	>sp|P36507|MP2K2_HUMAN Dual specificity mitogen-activated protein kinase kinase 2 OS=Homo sapiens GN=MAP2K2 PE=1 SV=1
0	0	0	0	2.32193	2.58496	0.943292	0.978486	1	1	-0.0876781	9	1	0	>sp|P36542|ATPG_HUMAN ATP synthase subunit gamma, mitochondrial OS=Homo sapiens GN=ATP5C1 PE=1 SV=1
0	0	1.73697	1.27302	0	1.45943	0.676504	0.909131	1	2	-0.331828	5.5	1	0	>sp|P36543|VATE1_HUMAN V-type proton ATPase subunit E 1 OS=Homo sapiens GN=ATP6V1E1 PE=1 SV=1
0	0	0	0	0	0	NaN	NaN	0	0	0	0	1	0	>sp|P36551|HEM6_HUMAN Oxygen-dependent coproporphyrinogen-III oxidase, mitochondrial OS=Homo sapiens GN=CPOX PE=1 SV=3
0	2.05889	0	0	1.62449	0	0.876476	0.971053	1	1	-0.144801	5.25	2	0	>sp|P36578|RL4_HUMAN 60S ribosomal protein L4 OS=Homo sapiens GN=RPL4 PE=1 SV=5
0	0	0	0	1.80735	0	0.373901	0.686745	1	0	0.602452	2.5	2	0	>sp|P36776|LONM_HUMAN Lon protease homolog, mitochondrial OS=Homo sapiens GN=LONP1 PE=1 SV=2
2.16993	1.73697	2.79008	0	0	0.807355	0.458907	0.779616	2	2	0.805227	12.5	2	0	>sp|P36873|PP1G_HUMAN Serine/threonine-protein phosphatase PP1-gamma catalytic subunit OS=Homo sapiens GN=PPP1CC PE=1 SV=1
0	0	0	0	0	0	NaN	NaN	0	0	0	0	1	0	>sp|P36957|ODO2_HUMAN Dihydrolipoyllysine-residue succinyltransferase component of 2-oxoglutarate dehydrogenase complex, mitochondrial OS=Homo sapiens GN=DLST PE=1 SV=4
0	0	0	0	1.05889	0	0.373901	0.686745	1	0	0.352965	1.08333	1	0	>sp|P37108|SRP14_HUMAN Signal recognition particle 14 kDa protein OS=Homo sapiens GN=SRP14 PE=1 SV=2
1.77259	2.02975	1.8413	1.77259	2.92283	1.05889	0.30251	0.686745	3	3	0.558498	18.1667	2	0	>sp|P37198|NUP62_HUMAN Nuclear pore glycoprotein p62 OS=Homo sapiens GN=NUP62 PE=1 SV=3
0	0.736966	2.70044	0.807355	0	0	0.70178	0.925058	1	2	0.385373	6.91667	1	0	>sp|P37268|FDFT_HUMAN Squalene synthase OS=Homo sapiens GN=FDFT1 PE=1 SV=1
0	0	0	0	1.62449	1.27302	0.873042	0.969525	1	1	0.117157	3.5	2	0	>sp|P37802|TAGL2_HUMAN Transgelin-2 OS=Homo sapiens GN=TAGLN2 PE=1 SV=3
0	0	0	0	1.62449	0	0.373901	0.686745	1	0	0.541497	2.08333	2	0	>sp|P37837|TALDO_HUMAN Transaldolase OS=Homo sapiens GN=TALDO1 PE=1 SV=2
1.32193	0	2.36923	0.736966	2.92283	1.58496	0.0945642	0.686745	3	2	1.43069	14.9167	1	0	>sp|P38117|ETFB_HUMAN Electron transfer flavoprotein subunit beta OS=Homo sapiens GN=ETFB PE=1 SV=3
0	0	0	0	2	0	0.373901	0.686745	1	0	0.666667	3	2	0	>sp|P38159|RBMX_HUMAN RNA-binding motif protein, X chromosome OS=Homo sapiens GN=RBMX PE=1 SV=3
0	0	0	0	0	0.5025	0.373901	0.686745	0	1	-0.1675	0.416667	1	0	>sp|P38405|GNAL_HUMAN Guanine nucleotide-binding protein G(olf) subunit alpha OS=Homo sapiens GN=GNAL PE=1 SV=1
0	0	1.27302	0	0	0	0.373901	0.686745	1	0	0.424339	1.41667	1	0	>sp|P38606|VATA_HUMAN V-type proton ATPase catalytic subunit A OS=Homo sapiens GN=ATP6V1A PE=1 SV=2
0	0	2.58496	0	0	3.70506	0.816392	0.94909	1	1	-0.373365	17.0417	1	0	>sp|P38646|GRP75_HUMAN Stress-70 protein, mitochondrial OS=Homo sapiens GN=HSPA9 PE=1 SV=2
0	0	0	1.9386	0	2.8413	0.130105	0.686745	0	2	-1.5933	9	1	0	>sp|P38919|IF4A3_HUMAN Eukaryotic initiation factor 4A-III OS=Homo sapiens GN=EIF4A3 PE=1 SV=4
0	0	0	0	2.52356	0	0.373901	0.686745	1	0	0.841187	4.75	1	0	>sp|P39019|RS19_HUMAN 40S ribosomal protein S19 OS=Homo sapiens GN=RPS19 PE=1 SV=2
0	0	1.11548	1.27302	0	0	0.930318	0.972756	1	1	-0.0525138	2.58333	2	0	>sp|P39023|RL3_HUMAN 60S ribosomal protein L3 OS=Homo sapiens GN=RPL3 PE=1 SV=2
1.36923	0	0.115477	2.1964	0	0	0.794797	0.946645	2	1	-0.237229	5.25	2	0	>sp|P39656|OST48_HUMAN Dolichyl-diphosphooligosaccharide--protein glycosyltransferase 48 kDa subunit OS=Homo sapiens GN=DDOST PE=1 SV=4
0	0	0	0	2	0	0.373901	0.686745	1	0	0.666667	3	2	0	>sp|P39687|AN32A_HUMAN Acidic leucine-rich nuclear phosphoprotein 32 family member A OS=Homo sapiens GN=ANP32A PE=1 SV=1
0	0	1.11548	1.27302	1.05889	0	0.618999	0.878706	2	1	0.300451	3.66667	2	0	>sp|P39748|FEN1_HUMAN Flap endonuclease 1 OS=Homo sapiens GN=FEN1 PE=1 SV=1
3.59495	3.42626	2.58496	3.90689	2.32193	1.77259	0.80266	0.946645	3	3	-0.201303	46.25	1	0	>sp|P39880|CUX1_HUMAN Homeobox protein cut-like 1 OS=Homo sapiens GN=CUX1 PE=1 SV=3
0	0	0	0	0	0	NaN	NaN	0	0	0	0	1	0	>sp|P40222|TXLNA_HUMAN Alpha-taxilin OS=Homo sapiens GN=TXLNA PE=1 SV=3
0	0	0	0	2.66297	0	0.373901	0.686745	1	0	0.887655	5.33333	1	0	>sp|P40227|TCPZ_HUMAN T-complex protein 1 subunit zeta OS=Homo sapiens GN=CCT6A PE=1 SV=3
0	0	0	0	0	0	NaN	NaN	0	0	0	0	1	0	>sp|P40259|CD79B_HUMAN B-cell antigen receptor complex-associated protein beta chain OS=Homo sapiens GN=CD79B PE=1 SV=1
0	0	0	0	1.62449	3.24793	0.677984	0.910379	1	1	-0.541146	10.5833	1	0	>sp|P40306|PSB10_HUMAN Proteasome subunit beta type-10 OS=Homo sapiens GN=PSMB10 PE=1 SV=1
1.32193	0	0	0	2	2.34577	0.756036	0.940709	2	1	0.325384	8.58333	2	0	>sp|P40429|RL13A_HUMAN 60S ribosomal protein L13a OS=Homo sapiens GN=RPL13A PE=1 SV=2
0	0	0	0	1.62449	0	0.373901	0.686745	1	0	0.541497	2.08333	2	0	>sp|P40616|ARL1_HUMAN ADP-ribosylation factor-like protein 1 OS=Homo sapiens GN=ARL1 PE=1 SV=1
0.222392	0	2.14296	1.36923	1.90689	2.02975	0.749318	0.940709	3	2	0.291087	11	2	0	>sp|P40692|MLH1_HUMAN DNA mismatch repair protein Mlh1 OS=Homo sapiens GN=MLH1 PE=1 SV=1
0	0	0	0	0	0	NaN	NaN	0	0	0	0	2	0	>sp|P40855|PEX19_HUMAN Peroxisomal biogenesis factor 19 OS=Homo sapiens GN=PEX19 PE=1 SV=1
0	0	0	0	1.62449	1.41504	0.927226	0.972756	1	1	0.0698178	3.75	2	0	>sp|P40925|MDHC_HUMAN Malate dehydrogenase, cytoplasmic OS=Homo sapiens GN=MDH1 PE=1 SV=4
0	1.27302	3.11548	1.27302	2.66297	0	0.367082	0.686745	2	2	1.07747	15.8333	1	0	>sp|P40926|MDHM_HUMAN Malate dehydrogenase, mitochondrial OS=Homo sapiens GN=MDH2 PE=1 SV=3
2.11548	0	0	0	0	3.24793	0.78469	0.946645	1	1	-0.377483	11.8333	1	0	>sp|P40937|RFC5_HUMAN Replication factor C subunit 5 OS=Homo sapiens GN=RFC5 PE=1 SV=1
2.40372	2.39232	1.16993	1.80735	0.938599	2.02975	0.30388	0.686745	3	3	-0.572391	16.2917	1	0	>sp|P40938|RFC3_HUMAN Replication factor C subunit 3 OS=Homo sapiens GN=RFC3 PE=1 SV=2
0	0	0	0	0	0	NaN	NaN	0	0	0	0	1	0	>sp|P40939|ECHA_HUMAN Trifunctional enzyme subunit alpha, mitochondrial OS=Homo sapiens GN=HADHA PE=1 SV=2
0	0	0	0	1.05889	0	0.373901	0.686745	1	0	0.352965	1.08333	1	0	>sp|P41091|IF2G_HUMAN Eukaryotic translation initiation factor 2 subunit 3 OS=Homo sapiens GN=EIF2S3 PE=1 SV=3
2.1964	0.938599	1.16993	2.89077	2.73697	2.75489	0.847038	0.964759	3	3	-0.160323	23.5833	1	0	>sp|P41214|EIF2D_HUMAN Eukaryotic translation initiation factor 2D OS=Homo sapiens GN=EIF2D PE=1 SV=3
0.874469	0	2.05889	0	0	1.27302	0.491749	0.81156	2	1	0.553448	5.41667	1	0	>sp|P41219|PERI_HUMAN Peripherin OS=Homo sapiens GN=PRPH PE=1 SV=2
0	0	0	0	0	1.27302	0.373901	0.686745	0	1	-0.424339	1.41667	2	0	>sp|P41236|IPP2_HUMAN Protein phosphatase inhibitor 2 OS=Homo sapiens GN=PPP1R2 PE=1 SV=2
0.874469	0.736966	3.11548	1.77259	2	0.5025	0.259171	0.686745	3	3	0.99263	15	1	0	>sp|P41240|CSK_HUMAN Tyrosine-protein kinase CSK OS=Homo sapiens GN=CSK PE=1 SV=1
0	0	0	0	0	0	NaN	NaN	0	0	0	0	1	0	>sp|P41250|SYG_HUMAN Glycine--tRNA ligase OS=Homo sapiens GN=GARS PE=1 SV=3
0.115477	0	0	0	0	1.11548	0.422941	0.744356	1	1	-0.333333	1.25	2	0	>sp|P41252|SYIC_HUMAN Isoleucine--tRNA ligase, cytoplasmic OS=Homo sapiens GN=IARS PE=1 SV=2
0	0	0	0	0	0	NaN	NaN	0	0	0	0	1	0	>sp|P41273|TNFL9_HUMAN Tumor necrosis factor ligand superfamily member 9 OS=Homo sapiens GN=TNFSF9 PE=1 SV=1
0	0	0	0	1.05889	0	0.373901	0.686745	1	0	0.352965	1.08333	2	0	>sp|P41567|EIF1_HUMAN Eukaryotic translation initiation factor 1 OS=Homo sapiens GN=EIF1 PE=1 SV=1
0	0	0	0	0	0.662965	0.373901	0.686745	0	1	-0.220988	0.583333	2	0	>sp|P42025|ACTY_HUMAN Beta-centractin OS=Homo sapiens GN=ACTR1B PE=1 SV=1
0.321928	0	0.662965	0	0	0	0.16146	0.686745	2	0	0.328298	0.833333	1	0	>sp|P42126|ECI1_HUMAN Enoyl-CoA delta isomerase 1, mitochondrial OS=Homo sapiens GN=ECI1 PE=1 SV=1
3.32193	3.16993	2.85798	2.70044	2.24793	0	0.456624	0.777711	3	2	0.852491	32.5	1	0	>sp|P42166|LAP2A_HUMAN Lamina-associated polypeptide 2, isoform alpha OS=Homo sapiens GN=TMPO PE=1 SV=2
1.43741	0	1.41504	0	3.12928	0	0.0246249	0.686745	3	0	1.99391	11.125	1	0	>sp|P42167|LAP2B_HUMAN Lamina-associated polypeptide 2, isoforms beta/gamma OS=Homo sapiens GN=TMPO PE=1 SV=2
0	0	0	1.77259	0	0	0.373901	0.686745	0	1	-0.590863	2.41667	2	0	>sp|P42224|STAT1_HUMAN Signal transducer and activator of transcription 1-alpha/beta OS=Homo sapiens GN=STAT1 PE=1 SV=2
2.73697	2.75489	2.36923	1.8413	1.62449	0.662965	0.515412	0.827127	3	3	0.490512	20.8333	1	0	>sp|P42226|STAT6_HUMAN Signal transducer and activator of transcription 6 OS=Homo sapiens GN=STAT6 PE=1 SV=1
0	0	1.73697	0	0	0	0.373901	0.686745	1	0	0.578989	2.33333	2	0.00527241	>sp|P42229|STA5A_HUMAN Signal transducer and activator of transcription 5A OS=Homo sapiens GN=STAT5A PE=1 SV=1
0	0	0	0	0	0	NaN	NaN	0	0	0	0	1	0	>sp|P42285|SK2L2_HUMAN Superkiller viralicidic activity 2-like 2 OS=Homo sapiens GN=SKIV2L2 PE=1 SV=3
0	0	0	0	1.05889	1.77259	0.747018	0.940709	1	1	-0.237899	3.5	2	0	>sp|P42331|RHG25_HUMAN Rho GTPase-activating protein 25 OS=Homo sapiens GN=ARHGAP25 PE=1 SV=2
3.87447	1.8413	3.24793	3.11548	2.92283	0	0.147588	0.686745	3	2	1.69615	39	1	0	>sp|P42345|MTOR_HUMAN Serine/threonine-protein kinase mTOR OS=Homo sapiens GN=MTOR PE=1 SV=1
0	3.06609	0	0	0	0	0.373901	0.686745	0	1	-1.02203	7.375	2	0	>sp|P42356|PI4KA_HUMAN Phosphatidylinositol 4-kinase alpha OS=Homo sapiens GN=PI4KA PE=1 SV=3
0	0	0.5025	1.77259	0	0	0.528507	0.838455	1	1	-0.423363	2.83333	2	0	>sp|P42357|HUTH_HUMAN Histidine ammonia-lyase OS=Homo sapiens GN=HAL PE=1 SV=1
0	1.27302	0	0	1.62449	1.77259	0.564954	0.857016	1	2	-0.473706	5.91667	2	0	>sp|P42566|EPS15_HUMAN Epidermal growth factor receptor substrate 15 OS=Homo sapiens GN=EPS15 PE=1 SV=2
0	0	0	0	0	0	NaN	NaN	0	0	0	0	2	0	>sp|P42574|CASP3_HUMAN Caspase-3 OS=Homo sapiens GN=CASP3 PE=1 SV=2
0	0.736966	1.11548	0	1.05889	0	0.335559	0.686745	2	1	0.479135	2.91667	2	0	>sp|P42575|CASP2_HUMAN Caspase-2 OS=Homo sapiens GN=CASP2 PE=1 SV=2
0.321928	1.73697	0.5025	0	1.05889	0	0.941062	0.977	3	1	0.0487855	4.08333	2	0	>sp|P42677|RS27_HUMAN 40S ribosomal protein S27 OS=Homo sapiens GN=RPS27 PE=1 SV=3
3.23522	3.47032	3.41504	2.34577	3.36923	3.11548	0.341536	0.686745	3	3	0.362639	49.25	2	0	>sp|P42694|HELZ_HUMAN Probable helicase with zinc finger domain OS=Homo sapiens GN=HELZ PE=1 SV=2
5.14975	1.8413	2.45943	4.98109	1.36923	0	0.715659	0.929125	3	2	0.718673	73.75	1	0	>sp|P42704|LPPRC_HUMAN Leucine-rich PPR motif-containing protein, mitochondrial OS=Homo sapiens GN=LRPPRC PE=1 SV=3
1.32193	0	1.11548	1.27302	2.52356	0	0.114357	0.686745	3	1	1.22932	8.83333	2	0	>sp|P42765|THIM_HUMAN 3-ketoacyl-CoA thiolase, mitochondrial OS=Homo sapiens GN=ACAA2 PE=1 SV=2
0	0	0	0	0	0.662965	0.373901	0.686745	0	1	-0.220988	0.583333	1	0	>sp|P42768|WASP_HUMAN Wiskott-Aldrich syndrome protein OS=Homo sapiens GN=WAS PE=1 SV=4
0.321928	0	2.05889	2.34577	0	1.27302	0.680812	0.910508	2	2	-0.412657	8.91667	1	0	>sp|P43007|SATT_HUMAN Neutral amino acid transporter A OS=Homo sapiens GN=SLC1A4 PE=1 SV=1
0	0	0	0	0	0	NaN	NaN	0	0	0	0	1	0	>sp|P43034|LIS1_HUMAN Platelet-activating factor acetylhydrolase IB subunit alpha OS=Homo sapiens GN=PAFAH1B1 PE=1 SV=2
3.76377	3.79008	3.47032	4.05889	1	2.14296	0.610346	0.878706	3	3	-0.585948	55.5833	2	0	>sp|P43243|MATR3_HUMAN Matrin-3 OS=Homo sapiens GN=MATR3 PE=1 SV=2
0	0	3.42626	0.584963	0	0	0.459568	0.780361	1	1	0.947101	10.25	1	0	>sp|P43246|MSH2_HUMAN DNA mismatch repair protein Msh2 OS=Homo sapiens GN=MSH2 PE=1 SV=1
2.02975	1.27302	0.5025	2.02975	0	0	0.777693	0.943255	2	2	-0.256839	8	1	0	>sp|P43304|GPDM_HUMAN Glycerol-3-phosphate dehydrogenase, mitochondrial OS=Homo sapiens GN=GPD2 PE=1 SV=3
0.938599	0	0	0	0	0	0.373901	0.686745	1	0	0.312866	0.916667	1	0	>sp|P43307|SSRA_HUMAN Translocon-associated protein subunit alpha OS=Homo sapiens GN=SSR1 PE=1 SV=3
0	0.584963	2.36923	0	0	2.02975	0.938333	0.974873	1	2	-0.0818253	7.75	2	0	>sp|P43378|PTN9_HUMAN Tyrosine-protein phosphatase non-receptor type 9 OS=Homo sapiens GN=PTPN9 PE=1 SV=1
3.23522	0	0	1.77259	3.8413	3.76377	0.76627	0.940709	2	2	0.513388	36.75	1	0	>sp|P43405|KSYK_HUMAN Tyrosine-protein kinase SYK OS=Homo sapiens GN=SYK PE=1 SV=1
0	0	1.73697	0	0	1.70044	0.988731	0.996392	1	1	0.0121753	4.58333	2	0	>sp|P43487|RANG_HUMAN Ran-specific GTPase-activating protein OS=Homo sapiens GN=RANBP1 PE=1 SV=1
0	0	0	0	0	0	NaN	NaN	0	0	0	0	2	0	>sp|P43490|NAMPT_HUMAN Nicotinamide phosphoribosyltransferase OS=Homo sapiens GN=NAMPT PE=1 SV=1
3.87447	4.16993	3.88671	2.75489	4.96578	5.01123	0.743314	0.940709	3	3	0.263642	111.708	1	0	>sp|P43686|PRS6B_HUMAN 26S protease regulatory subunit 6B OS=Homo sapiens GN=PSMC4 PE=1 SV=2
0	0	0	0	0	1.77259	0.373901	0.686745	0	1	-0.590863	2.41667	1	0	>sp|P43897|EFTS_HUMAN Elongation factor Ts, mitochondrial OS=Homo sapiens GN=TSFM PE=1 SV=2
0.874469	0	0	0	0	0	0.373901	0.686745	1	0	0.29149	0.833333	2	0.002886	>sp|P45379|TNNT2_HUMAN Troponin T, cardiac muscle OS=Homo sapiens GN=TNNT2 PE=1 SV=3
0	2.9386	0	1.62449	2.32193	2.34577	0.150853	0.686745	1	3	-1.52898	16.8333	2	0	>sp|P45880|VDAC2_HUMAN Voltage-dependent anion-selective channel protein 2 OS=Homo sapiens GN=VDAC2 PE=1 SV=2
0	0	0	0	0.415037	1.77259	0.49729	0.815572	1	1	-0.452517	2.75	1	0	>sp|P45973|CBX5_HUMAN Chromobox protein homolog 5 OS=Homo sapiens GN=CBX5 PE=1 SV=1
0	0	0	0	1.22239	1.5025	0.89201	0.972756	1	1	-0.0933693	3.16667	1	0	>sp|P45974|UBP5_HUMAN Ubiquitin carboxyl-terminal hydrolase 5 OS=Homo sapiens GN=USP5 PE=1 SV=2
0	0	2.24793	0	2	1.27302	0.297436	0.686745	2	1	0.991636	8.16667	1	0	>sp|P45983|MK08_HUMAN Mitogen-activated protein kinase 8 OS=Homo sapiens GN=MAPK8 PE=1 SV=2
0	0	0	1.27302	0.415037	1.27302	0.186704	0.686745	1	2	-0.710333	3.16667	2	0	>sp|P45984|MK09_HUMAN Mitogen-activated protein kinase 9 OS=Homo sapiens GN=MAPK9 PE=1 SV=2
1.77259	0	2.36923	0	0	1.27302	0.312627	0.686745	2	1	0.956268	8	1	0	>sp|P45985|MP2K4_HUMAN Dual specificity mitogen-activated protein kinase kinase 4 OS=Homo sapiens GN=MAP2K4 PE=1 SV=1
0	1.27302	0	0	0	0	0.373901	0.686745	0	1	-0.424339	1.41667	1	0	>sp|P46019|KPB2_HUMAN Phosphorylase b kinase regulatory subunit alpha, liver isoform OS=Homo sapiens GN=PHKA2 PE=1 SV=1
0	0	1.58496	2.54432	2.32193	3.87447	0.56234	0.85633	2	2	-0.8373	24.5	1	0	>sp|P46060|RAGP1_HUMAN Ran GTPase-activating protein 1 OS=Homo sapiens GN=RANGAP1 PE=1 SV=1
0.874469	0	0	0	0	0	0.373901	0.686745	1	0	0.29149	0.833333	1	0	>sp|P46063|RECQ1_HUMAN ATP-dependent DNA helicase Q1 OS=Homo sapiens GN=RECQL PE=1 SV=3
0	0	0	0	0	0	NaN	NaN	0	0	0	0	2	0	>sp|P46087|NOP2_HUMAN Probable 28S rRNA (cytosine(4447)-C(5))-methyltransferase OS=Homo sapiens GN=NOP2 PE=1 SV=2
0	0	1.11548	0	0	0	0.373901	0.686745	1	0	0.371826	1.16667	1	0	>sp|P46109|CRKL_HUMAN Crk-like protein OS=Homo sapiens GN=CRKL PE=1 SV=1
3.98489	4.77039	3.79874	4.40939	5.41222	5.61594	0.439942	0.763309	3	3	-0.533288	163.917	2	0	>sp|P46379|BAG6_HUMAN Large proline-rich protein BAG6 OS=Homo sapiens GN=BAG6 PE=1 SV=2
0	0	0	0	0	0	NaN	NaN	0	0	0	0	3	0	>sp|P46439|GSTM5_HUMAN Glutathione S-transferase Mu 5 OS=Homo sapiens GN=GSTM5 PE=1 SV=3
0.807355	1.73697	0	1.8413	0.807355	0	0.374203	0.686754	2	2	-0.654519	6.41667	2	0	>sp|P46459|NSF_HUMAN Vesicle-fusing ATPase OS=Homo sapiens GN=NSF PE=1 SV=3
0	0	2.05889	0	0	0	0.373901	0.686745	1	0	0.686298	3.16667	2	0	>sp|P46527|CDN1B_HUMAN Cyclin-dependent kinase inhibitor 1B OS=Homo sapiens GN=CDKN1B PE=1 SV=1
0	0	1.58496	0	1.87447	2.60486	0.79878	0.946645	2	1	0.284857	9.75	1	0	>sp|P46734|MP2K3_HUMAN Dual specificity mitogen-activated protein kinase kinase 3 OS=Homo sapiens GN=MAP2K3 PE=1 SV=2
1	0	0	0	2.32193	0.5025	0.24654	0.686745	2	1	0.939809	5.41667	1	0	>sp|P46736|BRCC3_HUMAN Lys-63-specific deubiquitinase BRCC36 OS=Homo sapiens GN=BRCC3 PE=1 SV=2
0	0	0	0	1.62449	0	0.373901	0.686745	1	0	0.541497	2.08333	2	0	>sp|P46776|RL27A_HUMAN 60S ribosomal protein L27a OS=Homo sapiens GN=RPL27A PE=1 SV=2
0	0	0	0	1.05889	2.56478	0.616155	0.878706	1	1	-0.501964	6	1	0	>sp|P46777|RL5_HUMAN 60S ribosomal protein L5 OS=Homo sapiens GN=RPL5 PE=1 SV=3
0	0	0	0	1.05889	0.662965	0.767158	0.940709	1	1	0.131976	1.66667	1	0	>sp|P46778|RL21_HUMAN 60S ribosomal protein L21 OS=Homo sapiens GN=RPL21 PE=1 SV=2
0	0	0	0	2	0	0.373901	0.686745	1	0	0.666667	3	2	0	>sp|P46781|RS9_HUMAN 40S ribosomal protein S9 OS=Homo sapiens GN=RPS9 PE=1 SV=3
0	0	0	0	2	0	0.373901	0.686745	1	0	0.666667	3	2	0	>sp|P46782|RS5_HUMAN 40S ribosomal protein S5 OS=Homo sapiens GN=RPS5 PE=1 SV=4
0.321928	0	1.8413	0.415037	1.8413	1.77259	0.457314	0.77804	3	2	0.605635	8.16667	1	0	>sp|P46783|RS10_HUMAN 40S ribosomal protein S10 OS=Homo sapiens GN=RPS10 PE=1 SV=1
0.222392	0	2.52356	0	4.49719	0	0.122311	0.686745	3	0	2.41438	26.5	1	0	>sp|P46821|MAP1B_HUMAN Microtubule-associated protein 1B OS=Homo sapiens GN=MAP1B PE=1 SV=2
0.584963	2.32193	3.41504	3.51307	4.36923	0	0.611305	0.878706	3	2	0.844745	44.25	2	0	>sp|P46940|IQGA1_HUMAN Ras GTPase-activating-like protein IQGAP1 OS=Homo sapiens GN=IQGAP1 PE=1 SV=1
3.41504	2.48113	2.36923	2.34577	2	0	0.339666	0.686745	3	2	0.98579	25.5	1	0	>sp|P46977|STT3A_HUMAN Dolichyl-diphosphooligosaccharide--protein glycosyltransferase subunit STT3A OS=Homo sapiens GN=STT3A PE=1 SV=2
0	0	0.321928	0	0	0.662965	0.667604	0.904204	1	1	-0.113679	0.833333	1	0	>sp|P47755|CAZA2_HUMAN F-actin-capping protein subunit alpha-2 OS=Homo sapiens GN=CAPZA2 PE=1 SV=3
0.321928	0	0	0	0	0	0.373901	0.686745	1	0	0.107309	0.25	2	0	>sp|P47756|CAPZB_HUMAN F-actin-capping protein subunit beta OS=Homo sapiens GN=CAPZB PE=1 SV=4
1.5025	0	0	1.58496	0	0	0.97169	0.990999	1	1	-0.0274874	3.83333	1	0	>sp|P47897|SYQ_HUMAN Glutamine--tRNA ligase OS=Homo sapiens GN=QARS PE=1 SV=1
0	0	0	0.736966	3.08746	2.02975	0.932609	0.973449	1	2	0.106917	11.25	1	0	>sp|P47914|RL29_HUMAN 60S ribosomal protein L29 OS=Homo sapiens GN=RPL29 PE=1 SV=2
0	0.736966	0	2.73697	0	2.02975	0.0350801	0.686745	0	3	-1.83456	9.41667	1	0	>sp|P47929|LEG7_HUMAN Galectin-7 OS=Homo sapiens GN=LGALS7 PE=1 SV=2
0.874469	0	0.5025	0	0	1.77259	0.847491	0.964759	2	1	-0.131873	3.66667	2	0	>sp|P47985|UCRI_HUMAN Cytochrome b-c1 complex subunit Rieske, mitochondrial OS=Homo sapiens GN=UQCRFS1 PE=1 SV=2
0	0	0	0	2.32193	2.56478	0.947407	0.979423	1	1	-0.0809522	8.91667	1	0	>sp|P48047|ATPO_HUMAN ATP synthase subunit O, mitochondrial OS=Homo sapiens GN=ATP5O PE=1 SV=1
0	0	0.5025	0	1.62449	0.662965	0.408141	0.728052	2	1	0.488009	3.08333	1	0	>sp|P48059|LIMS1_HUMAN LIM and senescent cell antigen-like-containing domain protein 1 OS=Homo sapiens GN=LIMS1 PE=1 SV=4
0	0	0	0	0.415037	0	0.373901	0.686745	1	0	0.138346	0.333333	1	0	>sp|P48147|PPCE_HUMAN Prolyl endopeptidase OS=Homo sapiens GN=PREP PE=1 SV=2
1.32193	0	0	0	0	0	0.373901	0.686745	1	0	0.440643	1.5	1	0	>sp|P48378|RFX2_HUMAN DNA-binding protein RFX2 OS=Homo sapiens GN=RFX2 PE=2 SV=2
0.938599	0.736966	2.05889	1.77259	0.415037	0	0.692082	0.91902	3	2	0.300992	7.5	1	0	>sp|P48380|RFX3_HUMAN Transcription factor RFX3 OS=Homo sapiens GN=RFX3 PE=1 SV=2
1.77259	2.34577	2.70044	2.73697	0	0	0.870015	0.969525	2	2	-0.203237	17.6667	2	0	>sp|P48382|RFX5_HUMAN DNA-binding protein RFX5 OS=Homo sapiens GN=RFX5 PE=1 SV=1
0	0	0.321928	0.415037	0	1.05889	0.304384	0.686745	1	2	-0.384001	1.66667	2	0	>sp|P48444|COPD_HUMAN Coatomer subunit delta OS=Homo sapiens GN=ARCN1 PE=1 SV=1
0	0	0	0	0	0	NaN	NaN	0	0	0	0	2	0	>sp|P48449|ERG7_HUMAN Lanosterol synthase OS=Homo sapiens GN=LSS PE=1 SV=1
0	0	3.41504	1.77259	2.60486	2.24793	0.618521	0.878706	2	2	0.666461	20.9167	1	0	>sp|P48454|PP2BC_HUMAN Serine/threonine-protein phosphatase 2B catalytic subunit gamma isoform OS=Homo sapiens GN=PPP3CC PE=1 SV=3
0.321928	0	1.11548	0	0.415037	1.77259	0.968903	0.98902	3	1	0.0266178	4.16667	1	0	>sp|P48507|GSH0_HUMAN Glutamate--cysteine ligase regulatory subunit OS=Homo sapiens GN=GCLM PE=1 SV=1
1.32193	1.27302	3.11548	2.34577	2.92283	3.26053	0.852428	0.964759	3	3	0.160306	29.8333	2	0	>sp|P48556|PSMD8_HUMAN 26S proteasome non-ATPase regulatory subunit 8 OS=Homo sapiens GN=PSMD8 PE=1 SV=2
0	0	1.11548	1.27302	1.64386	3.34577	0.599602	0.874881	2	2	-0.61982	13.875	1	0	>sp|P48594|SPB4_HUMAN Serpin B4 OS=Homo sapiens GN=SERPINB4 PE=1 SV=2
0	0	0	0	0	0	NaN	NaN	0	0	0	0	1	0	>sp|P48637|GSHB_HUMAN Glutathione synthetase OS=Homo sapiens GN=GSS PE=1 SV=1
0	0	0	0	0	0	NaN	NaN	0	0	0	0	2	0	>sp|P48643|TCPE_HUMAN T-complex protein 1 subunit epsilon OS=Homo sapiens GN=CCT5 PE=1 SV=1
0	0	0	6.05889	0	0	0.373901	0.686745	0	1	-2.01963	65.6667	2	0	>sp|P48668|K2C6C_HUMAN Keratin, type II cytoskeletal 6C OS=Homo sapiens GN=KRT6C PE=1 SV=3
0	0	0	0	0.415037	0	0.373901	0.686745	1	0	0.138346	0.333333	2	0	>sp|P48729|KC1A_HUMAN Casein kinase I isoform alpha OS=Homo sapiens GN=CSNK1A1 PE=1 SV=2
2.14296	3	2.79008	1.8413	1.45943	0	0.616686	0.878706	3	2	0.517055	20.6667	1	0	>sp|P48735|IDHP_HUMAN Isocitrate dehydrogenase [NADP], mitochondrial OS=Homo sapiens GN=IDH2 PE=1 SV=2
2.02975	0	0	0	0	0	0.373901	0.686745	1	0	0.676582	3.08333	1	0	>sp|P48736|PK3CG_HUMAN Phosphatidylinositol 4,5-bisphosphate 3-kinase catalytic subunit gamma isoform OS=Homo sapiens GN=PIK3CG PE=1 SV=3
0.321928	1.27302	0	0	1.05889	2.02975	0.393147	0.709243	2	2	-0.640648	5.83333	2	0	>sp|P48739|PIPNB_HUMAN Phosphatidylinositol transfer protein beta isoform OS=Homo sapiens GN=PITPNB PE=1 SV=2
0	0	0	2	2.68182	3.23522	0.548117	0.853691	1	2	-0.851131	16.8333	1	0	>sp|P48741|HSP77_HUMAN Putative heat shock 70 kDa protein 7 OS=Homo sapiens GN=HSPA7 PE=5 SV=2
0.874469	0	0.5025	0.415037	0.415037	0	0.0807065	0.686745	3	1	0.45899	1.91667	1	0	>sp|P48960|CD97_HUMAN CD97 antigen OS=Homo sapiens GN=CD97 PE=1 SV=4
0	0	0	0	0	0	NaN	NaN	0	0	0	0	2	0	>sp|P49005|DPOD2_HUMAN DNA polymerase delta subunit 2 OS=Homo sapiens GN=POLD2 PE=1 SV=1
0	0	0	0	0.415037	0	0.373901	0.686745	1	0	0.138346	0.333333	1	0	>sp|P49006|MRP_HUMAN MARCKS-related protein OS=Homo sapiens GN=MARCKSL1 PE=1 SV=2
0	0	1.73697	0	0	0	0.373901	0.686745	1	0	0.578989	2.33333	1	0	>sp|P49069|CAMLG_HUMAN Calcium signal-modulating cyclophilin ligand OS=Homo sapiens GN=CAMLG PE=1 SV=1
0	0	0	0	0.415037	0	0.373901	0.686745	1	0	0.138346	0.333333	1	0	>sp|P49189|AL9A1_HUMAN 4-trimethylaminobutyraldehyde dehydrogenase OS=Homo sapiens GN=ALDH9A1 PE=1 SV=3
0	0	0	0	1.05889	0	0.373901	0.686745	1	0	0.352965	1.08333	1	0	>sp|P49207|RL34_HUMAN 60S ribosomal protein L34 OS=Homo sapiens GN=RPL34 PE=1 SV=3
0	0	0	0	0	0.807355	0.373901	0.686745	0	1	-0.269118	0.75	1	0	>sp|P49247|RPIA_HUMAN Ribose-5-phosphate isomerase OS=Homo sapiens GN=RPIA PE=1 SV=3
0	0	1.11548	0	1.62449	0	0.129659	0.686745	2	0	0.913323	3.25	1	0	>sp|P49257|LMAN1_HUMAN Protein ERGIC-53 OS=Homo sapiens GN=LMAN1 PE=1 SV=2
0	0	0.5025	0	2.52356	0	0.260995	0.686745	2	0	1.00869	5.16667	1	0	>sp|P49321|NASP_HUMAN Nuclear autoantigenic sperm protein OS=Homo sapiens GN=NASP PE=1 SV=2
4.97537	0	0	2.79008	2.64386	0	0.400292	0.718436	2	1	1.60972	41.625	1	0	>sp|P49327|FAS_HUMAN Fatty acid synthase OS=Homo sapiens GN=FASN PE=1 SV=3
0	0	0	0	0	0.662965	0.373901	0.686745	0	1	-0.220988	0.583333	2	0	>sp|P49336|CDK8_HUMAN Cyclin-dependent kinase 8 OS=Homo sapiens GN=CDK8 PE=1 SV=1
0	0.662965	0	0	0	0	0.373901	0.686745	0	1	-0.220988	0.583333	2	0	>sp|P49354|FNTA_HUMAN Protein farnesyltransferase/geranylgeranyltransferase type-1 subunit alpha OS=Homo sapiens GN=FNTA PE=1 SV=1
0	0	0	0	0	0	NaN	NaN	0	0	0	0	1	0	>sp|P49356|FNTB_HUMAN Protein farnesyltransferase subunit beta OS=Homo sapiens GN=FNTB PE=1 SV=1
0	0	0	0	0	0.807355	0.373901	0.686745	0	1	-0.269118	0.75	1	0	>sp|P49366|DHYS_HUMAN Deoxyhypusine synthase OS=Homo sapiens GN=DHPS PE=1 SV=1
2.52356	0	3.44846	0	0	0	0.125568	0.686745	2	0	1.99067	14.6667	2	0	>sp|P49368|TCPG_HUMAN T-complex protein 1 subunit gamma OS=Homo sapiens GN=CCT3 PE=1 SV=4
1.85798	4.59991	0.415037	5.35462	4.32193	5.32643	0.0681415	0.686745	3	3	-2.89534	124.25	1	0	>sp|P49411|EFTU_HUMAN Elongation factor Tu, mitochondrial OS=Homo sapiens GN=TUFM PE=1 SV=2
0	0	0	0.115477	2	0	0.400123	0.718255	1	1	0.628174	3.08333	2	0	>sp|P49448|DHE4_HUMAN Glutamate dehydrogenase 2, mitochondrial OS=Homo sapiens GN=GLUD2 PE=1 SV=2
2.54432	1.27302	3.11548	2.34577	1.05889	1.27302	0.439183	0.763208	3	3	0.60896	20.5	2	0	>sp|P49585|PCY1A_HUMAN Choline-phosphate cytidylyltransferase A OS=Homo sapiens GN=PCYT1A PE=1 SV=2
1.24793	0	0	0	0	0	0.373901	0.686745	1	0	0.415976	1.375	1	0	>sp|P49588|SYAC_HUMAN Alanine--tRNA ligase, cytoplasmic OS=Homo sapiens GN=AARS PE=1 SV=2
0	0	0	0	0	0	NaN	NaN	0	0	0	0	3	0	>sp|P49590|SYHM_HUMAN Probable histidine--tRNA ligase, mitochondrial OS=Homo sapiens GN=HARS2 PE=1 SV=1
0	0	0	0	0	0	NaN	NaN	0	0	0	0	2	0	>sp|P49591|SYSC_HUMAN Serine--tRNA ligase, cytoplasmic OS=Homo sapiens GN=SARS PE=1 SV=3
2.54432	1.39232	2.92283	1.45943	1.62449	1.27302	0.0639746	0.686745	3	3	0.988959	18.2917	1	0	>sp|P49642|PRI1_HUMAN DNA primase small subunit OS=Homo sapiens GN=PRIM1 PE=1 SV=1
1.77259	0	2.05889	1.27302	1.62449	0	0.0346179	0.686745	3	1	1.39432	9.08333	1	0	>sp|P49643|PRI2_HUMAN DNA primase large subunit OS=Homo sapiens GN=PRIM2 PE=1 SV=2
0	0	0	0	0	0	NaN	NaN	0	0	0	0	1	0.00903342	>sp|P49716|CEBPD_HUMAN CCAAT/enhancer-binding protein delta OS=Homo sapiens GN=CEBPD PE=1 SV=2
0	0	0	0	2.32193	0	0.373901	0.686745	1	0	0.773976	4	2	0	>sp|P49720|PSB3_HUMAN Proteasome subunit beta type-3 OS=Homo sapiens GN=PSMB3 PE=1 SV=2
0	0	0	0	2.32193	2.75489	0.910142	0.972756	1	1	-0.14432	9.75	1	0	>sp|P49721|PSB2_HUMAN Proteasome subunit beta type-2 OS=Homo sapiens GN=PSMB2 PE=1 SV=1
0.5025	1.9386	0	3.11548	0.938599	0	0.272766	0.686745	2	2	-1.20433	11.8333	1	0	>sp|P49736|MCM2_HUMAN DNA replication licensing factor MCM2 OS=Homo sapiens GN=MCM2 PE=1 SV=4
2.41504	3.3339	3.23522	3.56478	1.58496	0	0.93261	0.973449	3	2	0.112177	34.6667	1	0	>sp|P49748|ACADV_HUMAN Very long-chain specific acyl-CoA dehydrogenase, mitochondrial OS=Homo sapiens GN=ACADVL PE=1 SV=1
0.321928	0	2.36923	0	0	0	0.293211	0.686745	2	0	0.897054	4.41667	2	0	>sp|P49753|ACOT2_HUMAN Acyl-coenzyme A thioesterase 2, mitochondrial OS=Homo sapiens GN=ACOT2 PE=1 SV=6
0	0	1.11548	0	0	0	0.373901	0.686745	1	0	0.371826	1.16667	1	0	>sp|P49754|VPS41_HUMAN Vacuolar protein sorting-associated protein 41 homolog OS=Homo sapiens GN=VPS41 PE=1 SV=3
0	0	0	0	1.05889	0	0.373901	0.686745	1	0	0.352965	1.08333	2	0	>sp|P49755|TMEDA_HUMAN Transmembrane emp24 domain-containing protein 10 OS=Homo sapiens GN=TMED10 PE=1 SV=2
0	1.27302	0.5025	0	0	0	0.603498	0.874881	1	1	-0.256839	1.83333	1	0	>sp|P49770|EI2BB_HUMAN Translation initiation factor eIF-2B subunit beta OS=Homo sapiens GN=EIF2B2 PE=1 SV=3
2.71882	3.32193	3.78136	3.77259	3.6677	3.77259	0.561736	0.855781	3	3	-0.233075	64.375	1	0	>sp|P49790|NU153_HUMAN Nuclear pore complex protein Nup153 OS=Homo sapiens GN=NUP153 PE=1 SV=2
5.17991	4.38945	3.01495	4.48113	4.1964	0	0.505355	0.821805	3	2	1.17356	100.958	1	0	>sp|P49792|RBP2_HUMAN E3 SUMO-protein ligase RanBP2 OS=Homo sapiens GN=RANBP2 PE=1 SV=2
1.77259	3.42626	0	0	0	0	0.690236	0.917495	1	1	-0.551225	12.1667	2	0	>sp|P49815|TSC2_HUMAN Tuberin OS=Homo sapiens GN=TSC2 PE=1 SV=2
0	1.77259	0	0.736966	0	0	0.179046	0.686745	0	2	-0.836518	3.08333	2	0	>sp|P49821|NDUV1_HUMAN NADH dehydrogenase [ubiquinone] flavoprotein 1, mitochondrial OS=Homo sapiens GN=NDUFV1 PE=1 SV=4
0	0	0.5025	0	0	0	0.373901	0.686745	1	0	0.1675	0.416667	1	0.00146092	>sp|P49841|GSK3B_HUMAN Glycogen synthase kinase-3 beta OS=Homo sapiens GN=GSK3B PE=1 SV=2
3.59495	4.08746	2.92283	3.77259	2.92283	2.34577	0.683217	0.911274	3	3	-0.255072	57	2	0	>sp|P49848|TAF6_HUMAN Transcription initiation factor TFIID subunit 6 OS=Homo sapiens GN=TAF6 PE=1 SV=1
0	0	0	0	0	0	NaN	NaN	0	0	0	0	1	0	>sp|P49902|5NTC_HUMAN Cytosolic purine 5'-nucleotidase OS=Homo sapiens GN=NT5C2 PE=1 SV=1
0	0	0	0	0	0	NaN	NaN	0	0	0	0	2	0	>sp|P49903|SPS1_HUMAN Selenide, water dikinase 1 OS=Homo sapiens GN=SEPHS1 PE=1 SV=2
0	0	0	0	0	0.584963	0.373901	0.686745	0	1	-0.194988	0.5	1	0	>sp|P49915|GUAA_HUMAN GMP synthase [glutamine-hydrolyzing] OS=Homo sapiens GN=GMPS PE=1 SV=1
0	0	0	0	0	0	NaN	NaN	0	0	0	0	2	0	>sp|P49916|DNLI3_HUMAN DNA ligase 3 OS=Homo sapiens GN=LIG3 PE=1 SV=2
0.321928	0	0	0	0	0	0.373901	0.686745	1	0	0.107309	0.25	2	0.00940228	>sp|P49917|DNLI4_HUMAN DNA ligase 4 OS=Homo sapiens GN=LIG4 PE=1 SV=2
0	0.70044	0.874469	0.807355	0	0	0.613603	0.878706	1	2	-0.211109	2.20833	2	0	>sp|P49959|MRE11_HUMAN Double-strand break repair protein MRE11A OS=Homo sapiens GN=MRE11A PE=1 SV=3
0	0	2.05889	0	2	1.27302	0.30962	0.686745	2	1	0.928625	7.58333	2	0	>sp|P50213|IDH3A_HUMAN Isocitrate dehydrogenase [NAD] subunit alpha, mitochondrial OS=Homo sapiens GN=IDH3A PE=1 SV=1
1.77259	1.77259	1.11548	1.27302	2.73697	1.77259	0.618815	0.878706	3	3	0.268945	15.5	1	0	>sp|P50336|PPOX_HUMAN Protoporphyrinogen oxidase OS=Homo sapiens GN=PPOX PE=1 SV=1
0	0	0	0	2.32193	0	0.373901	0.686745	1	0	0.773976	4	1	0	>sp|P50395|GDIB_HUMAN Rab GDP dissociation inhibitor beta OS=Homo sapiens GN=GDI2 PE=1 SV=2
0	2.1964	0.874469	1	2.92283	2.34577	0.579266	0.86614	2	3	-0.581624	16.0833	1	0	>sp|P50402|EMD_HUMAN Emerin OS=Homo sapiens GN=EMD PE=1 SV=1
2.89077	0	0.874469	1.36923	0	0	0.456557	0.777711	2	1	0.798669	8.83333	1	0	>sp|P50416|CPT1A_HUMAN Carnitine O-palmitoyltransferase 1, liver isoform OS=Homo sapiens GN=CPT1A PE=1 SV=2
0.321928	0	0	0	0	0.662965	0.667604	0.904204	1	1	-0.113679	0.833333	2	0	>sp|P50454|SERPH_HUMAN Serpin H1 OS=Homo sapiens GN=SERPINH1 PE=1 SV=2
0	0	0	0	0	0	NaN	NaN	0	0	0	0	2	0	>sp|P50502|F10A1_HUMAN Hsc70-interacting protein OS=Homo sapiens GN=ST13 PE=1 SV=2
0	0	0	0.736966	0	0	0.373901	0.686745	0	1	-0.245655	0.666667	1	0.00433839	>sp|P50548|ERF_HUMAN ETS domain-containing transcription factor ERF OS=Homo sapiens GN=ERF PE=1 SV=2
0	0	0	0.736966	0.415037	1.27302	0.248631	0.686745	1	2	-0.531649	2.41667	2	0	>sp|P50552|VASP_HUMAN Vasodilator-stimulated phosphoprotein OS=Homo sapiens GN=VASP PE=1 SV=3
0	0	3.89885	3.39232	3.61471	3.39232	0.892584	0.972756	2	2	0.242976	44.1667	1	0	>sp|P50570|DYN2_HUMAN Dynamin-2 OS=Homo sapiens GN=DNM2 PE=1 SV=2
0	0	0	0	0	0	NaN	NaN	0	0	0	0	2	0	>sp|P50613|CDK7_HUMAN Cyclin-dependent kinase 7 OS=Homo sapiens GN=CDK7 PE=1 SV=1
2.34577	0	0	0	0	0	0.373901	0.686745	1	0	0.781925	4.08333	1	0	>sp|P50748|KNTC1_HUMAN Kinetochore-associated protein 1 OS=Homo sapiens GN=KNTC1 PE=1 SV=1
0	0	1.54432	0	1.05889	2.34577	0.929028	0.972756	2	1	0.0858131	7.08333	1	0	>sp|P50749|RASF2_HUMAN Ras association domain-containing protein 2 OS=Homo sapiens GN=RASSF2 PE=1 SV=1
1.9386	0	0	0	0.415037	1.77259	0.827861	0.957556	2	1	0.193682	5.58333	1	0	>sp|P50750|CDK9_HUMAN Cyclin-dependent kinase 9 OS=Homo sapiens GN=CDK9 PE=1 SV=3
0	0	0	0	1.05889	0	0.373901	0.686745	1	0	0.352965	1.08333	1	0	>sp|P50914|RL14_HUMAN 60S ribosomal protein L14 OS=Homo sapiens GN=RPL14 PE=1 SV=4
0	0	0	0	0	0	NaN	NaN	0	0	0	0	1	0	>sp|P50990|TCPQ_HUMAN T-complex protein 1 subunit theta OS=Homo sapiens GN=CCT8 PE=1 SV=4
0	0	3.35755	0	0	3.78136	0.937235	0.974555	1	1	-0.141269	22	1	0	>sp|P50991|TCPD_HUMAN T-complex protein 1 subunit delta OS=Homo sapiens GN=CCT4 PE=1 SV=4
0	0	0	1.32193	3.05889	2.05889	0.932155	0.973323	1	2	-0.107309	12	2	0	>sp|P50993|AT1A2_HUMAN Sodium/potassium-transporting ATPase subunit alpha-2 OS=Homo sapiens GN=ATP1A2 PE=1 SV=1
0	0	0.5025	1.27302	0.415037	0	0.80605	0.946645	2	1	-0.118494	2.16667	1	0	>sp|P50995|ANX11_HUMAN Annexin A11 OS=Homo sapiens GN=ANXA11 PE=1 SV=1
1.32193	0	0	0	0	0	0.373901	0.686745	1	0	0.440643	1.5	2	0	>sp|P51003|PAPOA_HUMAN Poly(A) polymerase alpha OS=Homo sapiens GN=PAPOLA PE=1 SV=4
0	0	0	0	2.52356	0	0.373901	0.686745	1	0	0.841187	4.75	2	0	>sp|P51114|FXR1_HUMAN Fragile X mental retardation syndrome-related protein 1 OS=Homo sapiens GN=FXR1 PE=1 SV=3
0	0	0	0	0.415037	0	0.373901	0.686745	1	0	0.138346	0.333333	4	0.00154202	>sp|P51116|FXR2_HUMAN Fragile X mental retardation syndrome-related protein 2 OS=Homo sapiens GN=FXR2 PE=1 SV=2
0.736966	0	1.54432	0	0	0.5025	0.281203	0.686745	2	1	0.592929	3	1	0	>sp|P51148|RAB5C_HUMAN Ras-related protein Rab-5C OS=Homo sapiens GN=RAB5C PE=1 SV=2
0	0	0	0	0.415037	0	0.373901	0.686745	1	0	0.138346	0.333333	2	0	>sp|P51149|RAB7A_HUMAN Ras-related protein Rab-7a OS=Homo sapiens GN=RAB7A PE=1 SV=1
0	0	0	0	1.05889	2.34577	0.643322	0.888473	1	1	-0.42896	5.16667	3	0	>sp|P51153|RAB13_HUMAN Ras-related protein Rab-13 OS=Homo sapiens GN=RAB13 PE=1 SV=1
0.321928	0	0	1.77259	1.62449	1.77259	0.527886	0.838455	2	2	-0.53292	7.16667	1	0	>sp|P51157|RAB28_HUMAN Ras-related protein Rab-28 OS=Homo sapiens GN=RAB28 PE=1 SV=2
0.807355	0	3.30986	1.05889	3.36923	2.34577	0.277342	0.686745	3	2	1.36059	24.1667	1	0	>sp|P51398|RT29_HUMAN 28S ribosomal protein S29, mitochondrial OS=Homo sapiens GN=DAP3 PE=1 SV=1
1.11548	0	0	0	1.05889	0	0.116386	0.686745	2	0	0.72479	2.25	2	0	>sp|P51451|BLK_HUMAN Tyrosine-protein kinase Blk OS=Homo sapiens GN=BLK PE=1 SV=3
0	0	0	1.27302	0	0	0.373901	0.686745	0	1	-0.424339	1.41667	2	0.00168209	>sp|P51513|NOVA1_HUMAN RNA-binding protein Nova-1 OS=Homo sapiens GN=NOVA1 PE=1 SV=1
2.92283	0	0	0	0	2.24793	0.863673	0.968422	1	1	0.224968	10.3333	1	0	>sp|P51570|GALK1_HUMAN Galactokinase OS=Homo sapiens GN=GALK1 PE=1 SV=1
0	0	0	0	0	0	NaN	NaN	0	0	0	0	1	0	>sp|P51571|SSRD_HUMAN Translocon-associated protein subunit delta OS=Homo sapiens GN=SSR4 PE=1 SV=1
0	0	0.5025	0	0	0	0.373901	0.686745	1	0	0.1675	0.416667	2	0.00825593	>sp|P51572|BAP31_HUMAN B-cell receptor-associated protein 31 OS=Homo sapiens GN=BCAP31 PE=1 SV=3
4.73019	3.30986	3.68182	3.87447	1.22239	0	0.635407	0.880431	3	2	0.816693	61.2917	2	0	>sp|P51610|HCFC1_HUMAN Host cell factor 1 OS=Homo sapiens GN=HCFC1 PE=1 SV=2
0	0	2.41504	0	0.938599	2.75489	0.871358	0.969525	2	1	0.199583	11	2	0	>sp|P51617|IRAK1_HUMAN Interleukin-1 receptor-associated kinase 1 OS=Homo sapiens GN=IRAK1 PE=1 SV=2
0	0	3.11548	1.77259	0.415037	0	0.634771	0.88001	2	1	0.585975	10.4167	2	0	>sp|P51648|AL3A2_HUMAN Fatty aldehyde dehydrogenase OS=Homo sapiens GN=ALDH3A2 PE=1 SV=1
0	0	1.73697	0	0	0	0.373901	0.686745	1	0	0.578989	2.33333	1	0	>sp|P51649|SSDH_HUMAN Succinate-semialdehyde dehydrogenase, mitochondrial OS=Homo sapiens GN=ALDH5A1 PE=1 SV=2
2.89077	2.34577	3.11548	0	3.47032	3.08746	0.227229	0.686745	3	2	1.34778	35.75	1	0	>sp|P51665|PSMD7_HUMAN 26S proteasome non-ATPase regulatory subunit 7 OS=Homo sapiens GN=PSMD7 PE=1 SV=2
0	0.662965	2.05889	1.77259	0	0	0.8909	0.972756	1	2	-0.125554	6.16667	2	0	>sp|P51692|STA5B_HUMAN Signal transducer and activator of transcription 5B OS=Homo sapiens GN=STAT5B PE=1 SV=2
1.24793	2.07325	0	0	0	3	0.262922	0.686745	1	2	-1.27511	11.5833	2	0	>sp|P51784|UBP11_HUMAN Ubiquitin carboxyl-terminal hydrolase 11 OS=Homo sapiens GN=USP11 PE=1 SV=3
1.32193	2.58496	2.70044	2.34577	0	0	0.802806	0.946645	2	2	-0.30279	16.0833	1	0	>sp|P51798|CLCN7_HUMAN H(+)/Cl(-) exchange transporter 7 OS=Homo sapiens GN=CLCN7 PE=1 SV=2
0	0	0	0	0	1.27302	0.373901	0.686745	0	1	-0.424339	1.41667	1	0	>sp|P51809|VAMP7_HUMAN Vesicle-associated membrane protein 7 OS=Homo sapiens GN=VAMP7 PE=1 SV=3
0	0	0	0	0	0	NaN	NaN	0	0	0	0	1	0	>sp|P51812|KS6A3_HUMAN Ribosomal protein S6 kinase alpha-3 OS=Homo sapiens GN=RPS6KA3 PE=1 SV=1
0	0	0	0	1.05889	0	0.373901	0.686745	1	0	0.352965	1.08333	1	0.00642742	>sp|P51858|HDGF_HUMAN Hepatoma-derived growth factor OS=Homo sapiens GN=HDGF PE=1 SV=1
0	1.27302	0	0	0	0	0.373901	0.686745	0	1	-0.424339	1.41667	2	0	>sp|P51946|CCNH_HUMAN Cyclin-H OS=Homo sapiens GN=CCNH PE=1 SV=1
0	0	0	0	0	0	NaN	NaN	0	0	0	0	1	0	>sp|P51948|MAT1_HUMAN CDK-activating kinase assembly factor MAT1 OS=Homo sapiens GN=MNAT1 PE=1 SV=1
0	0	1.11548	0	0	0	0.373901	0.686745	1	0	0.371826	1.16667	1	0	>sp|P51991|ROA3_HUMAN Heterogeneous nuclear ribonucleoprotein A3 OS=Homo sapiens GN=HNRNPA3 PE=1 SV=2
0	1.27302	0.662965	0	3.22239	0	0.461492	0.782617	2	1	0.87078	10.3333	1	0	>sp|P52209|6PGD_HUMAN 6-phosphogluconate dehydrogenase, decarboxylating OS=Homo sapiens GN=PGD PE=1 SV=3
3.20294	3.45943	4.36923	4.17659	3.66297	5.33241	0.419319	0.740335	3	3	-0.577764	105.917	2	0	>sp|P52272|HNRPM_HUMAN Heterogeneous nuclear ribonucleoprotein M OS=Homo sapiens GN=HNRNPM PE=1 SV=3
0	0	0	0	2.52356	0	0.373901	0.686745	1	0	0.841187	4.75	1	0	>sp|P52292|IMA1_HUMAN Importin subunit alpha-1 OS=Homo sapiens GN=KPNA2 PE=1 SV=1
0	0	0	0	0.415037	0	0.373901	0.686745	1	0	0.138346	0.333333	1	0	>sp|P52294|IMA5_HUMAN Importin subunit alpha-5 OS=Homo sapiens GN=KPNA1 PE=1 SV=3
0	0	0	0	1.05889	0	0.373901	0.686745	1	0	0.352965	1.08333	2	0	>sp|P52434|RPAB3_HUMAN DNA-directed RNA polymerases I, II, and III subunit RPABC3 OS=Homo sapiens GN=POLR2H PE=1 SV=4
0	0	0	0	1.05889	0	0.373901	0.686745	1	0	0.352965	1.08333	1	0	>sp|P52564|MP2K6_HUMAN Dual specificity mitogen-activated protein kinase kinase 6 OS=Homo sapiens GN=MAP2K6 PE=1 SV=1
0.321928	0	0	0	1.62449	0	0.261452	0.686745	2	0	0.648806	2.33333	2	0	>sp|P52565|GDIR1_HUMAN Rho GDP-dissociation inhibitor 1 OS=Homo sapiens GN=ARHGDIA PE=1 SV=3
0	0	0	0	0.415037	1.05889	0.601567	0.874881	1	1	-0.214619	1.41667	2	0	>sp|P52566|GDIR2_HUMAN Rho GDP-dissociation inhibitor 2 OS=Homo sapiens GN=ARHGDIB PE=1 SV=3
0	0	0	0	0	3.65344	0.373901	0.686745	0	1	-1.21781	11.5833	1	0	>sp|P52597|HNRPF_HUMAN Heterogeneous nuclear ribonucleoprotein F OS=Homo sapiens GN=HNRNPF PE=1 SV=3
0	0	0	0	2.52356	2.02975	0.886191	0.972756	1	1	0.164605	7.83333	1	0	>sp|P52630|STAT2_HUMAN Signal transducer and activator of transcription 2 OS=Homo sapiens GN=STAT2 PE=1 SV=1
0	0	1.11548	0	0	0.662965	0.744877	0.940709	1	1	0.150837	1.75	2	0	>sp|P52655|TF2AA_HUMAN Transcription initiation factor IIA subunit 1 OS=Homo sapiens GN=GTF2A1 PE=1 SV=1
2.11548	0	2.36923	0	2.52356	0	3.96625e-05	0.0695481	3	0	2.33609	12.25	1	0	>sp|P52701|MSH6_HUMAN DNA mismatch repair protein Msh6 OS=Homo sapiens GN=MSH6 PE=1 SV=2
0	1.77259	0	0	2.52356	0	0.819586	0.951331	1	1	0.250324	7.16667	1	0	>sp|P52732|KIF11_HUMAN Kinesin-like protein KIF11 OS=Homo sapiens GN=KIF11 PE=1 SV=2
0	0	0	0	0	0	NaN	NaN	0	0	0	0	1	0.00482509	>sp|P52735|VAV2_HUMAN Guanine nucleotide exchange factor VAV2 OS=Homo sapiens GN=VAV2 PE=1 SV=2
0	0	0	1.27302	0	0	0.373901	0.686745	0	1	-0.424339	1.41667	2	0	>sp|P52739|ZN131_HUMAN Zinc finger protein 131 OS=Homo sapiens GN=ZNF131 PE=1 SV=2
1.32193	1.27302	0	0	0	0	0.980015	0.992155	1	1	0.0163032	2.91667	2	0	>sp|P52747|ZN143_HUMAN Zinc finger protein 143 OS=Homo sapiens GN=ZNF143 PE=1 SV=2
0	0	0	0	3.36923	2.77259	0.897843	0.972756	1	1	0.198881	15.1667	1	0	>sp|P52789|HXK2_HUMAN Hexokinase-2 OS=Homo sapiens GN=HK2 PE=1 SV=2
0.874469	0	0	1.77259	1.05889	1.27302	0.582402	0.867051	2	2	-0.370748	5.75	1	0	>sp|P52790|HXK3_HUMAN Hexokinase-3 OS=Homo sapiens GN=HK3 PE=1 SV=2
0.321928	0	0	0	0	0	0.373901	0.686745	1	0	0.107309	0.25	1	0.001443	>sp|P52799|EFNB2_HUMAN Ephrin-B2 OS=Homo sapiens GN=EFNB2 PE=1 SV=1
0	0	0	0	0	0	NaN	NaN	0	0	0	0	1	0	>sp|P52888|THOP1_HUMAN Thimet oligopeptidase OS=Homo sapiens GN=THOP1 PE=1 SV=2
0	0	2.70044	0	0	0	0.373901	0.686745	1	0	0.900147	5.5	1	0	>sp|P52907|CAZA1_HUMAN F-actin-capping protein subunit alpha-1 OS=Homo sapiens GN=CAPZA1 PE=1 SV=3
3.52878	3.79874	3.60486	2.65344	3.36923	3.39232	0.556378	0.853691	3	3	0.219458	58.75	1	0	>sp|P52948|NUP98_HUMAN Nuclear pore complex protein Nup98-Nup96 OS=Homo sapiens GN=NUP98 PE=1 SV=4
1.5025	0	2.05889	0	0.415037	1.77259	0.390162	0.705793	3	1	0.734614	7.75	1	0	>sp|P53007|TXTP_HUMAN Tricarboxylate transport protein, mitochondrial OS=Homo sapiens GN=SLC25A1 PE=1 SV=2
0	0	0.5025	0	2	1.27302	0.607071	0.877334	2	1	0.409827	4.83333	2	0	>sp|P53041|PPP5_HUMAN Serine/threonine-protein phosphatase 5 OS=Homo sapiens GN=PPP5C PE=1 SV=1
1.32193	0	1.11548	0	0	0	0.118962	0.686745	2	0	0.812468	2.66667	2	0	>sp|P53365|ARFP2_HUMAN Arfaptin-2 OS=Homo sapiens GN=ARFIP2 PE=1 SV=1
2.85798	2.08746	2.05889	2.34577	1.62449	1.27302	0.596541	0.874881	3	3	0.27837	20.25	1	0	>sp|P53367|ARFP1_HUMAN Arfaptin-1 OS=Homo sapiens GN=ARFIP1 PE=1 SV=2
0.321928	1.77259	1.73697	0	0	1.27302	0.683788	0.911459	2	2	-0.328905	6.41667	1	0	>sp|P53384|NUBP1_HUMAN Cytosolic Fe-S cluster assembly factor NUBP1 OS=Homo sapiens GN=NUBP1 PE=1 SV=2
0	1.11548	0	0	0	0.807355	0.126229	0.686745	0	2	-0.640944	1.91667	1	0	>sp|P53396|ACLY_HUMAN ATP-citrate synthase OS=Homo sapiens GN=ACLY PE=1 SV=3
0	0	0.5025	0.736966	0.415037	1.27302	0.414379	0.734201	2	2	-0.364149	2.83333	1	0	>sp|P53582|MAP11_HUMAN Methionine aminopeptidase 1 OS=Homo sapiens GN=METAP1 PE=1 SV=2
0	0	0	0	0	0	NaN	NaN	0	0	0	0	1	0.0042343	>sp|P53602|MVD1_HUMAN Diphosphomevalonate decarboxylase OS=Homo sapiens GN=MVD PE=1 SV=1
0	0	1.11548	0	0	0	0.373901	0.686745	1	0	0.371826	1.16667	1	0	>sp|P53611|PGTB2_HUMAN Geranylgeranyl transferase type-2 subunit beta OS=Homo sapiens GN=RABGGTB PE=1 SV=2
0	2.05889	1.22239	0.662965	2	0	0.852388	0.964759	2	2	0.166845	8.08333	1	0	>sp|P53618|COPB_HUMAN Coatomer subunit beta OS=Homo sapiens GN=COPB1 PE=1 SV=3
3.52356	3.02975	0	0	2.32193	0	0.551532	0.853691	2	1	0.938581	21.6667	1	0	>sp|P53621|COPA_HUMAN Coatomer subunit alpha OS=Homo sapiens GN=COPA PE=1 SV=2
2.89077	3.05166	3.55459	4.17659	0	0	0.882526	0.972507	2	2	-0.260964	41.5417	3	0	>sp|P53675|CLH2_HUMAN Clathrin heavy chain 2 OS=Homo sapiens GN=CLTCL1 PE=1 SV=2
0	0	0	0.736966	0.415037	0.662965	0.294078	0.686745	1	2	-0.328298	1.58333	3	0	>sp|P53778|MK12_HUMAN Mitogen-activated protein kinase 12 OS=Homo sapiens GN=MAPK12 PE=1 SV=3
0	0	0.662965	0	2	1.27302	0.557687	0.853691	2	1	0.463316	5	2	0	>sp|P53779|MK10_HUMAN Mitogen-activated protein kinase 10 OS=Homo sapiens GN=MAPK10 PE=1 SV=2
4.00749	4.05889	3.30986	3.58496	2.32193	0.662965	0.723305	0.929282	3	3	0.444152	55.25	1	0	>sp|P53985|MOT1_HUMAN Monocarboxylate transporter 1 OS=Homo sapiens GN=SLC16A1 PE=1 SV=3
0.321928	0	1.11548	0	2	2.02975	0.603005	0.874881	3	1	0.469219	7.5	2	0	>sp|P53990|IST1_HUMAN IST1 homolog OS=Homo sapiens GN=IST1 PE=1 SV=1
3.41504	1.16993	0	0.415037	0	1.5025	0.930893	0.972779	1	3	0.109192	13.0833	2	0	>sp|P53992|SC24C_HUMAN Protein transport protein Sec24C OS=Homo sapiens GN=SEC24C PE=1 SV=3
0	0	0	0	2	0	0.373901	0.686745	1	0	0.666667	3	1	0	>sp|P53999|TCP4_HUMAN Activated RNA polymerase II transcriptional coactivator p15 OS=Homo sapiens GN=SUB1 PE=1 SV=3
0	0	0	0	0	0	NaN	NaN	0	0	0	0	2	0	>sp|P54105|ICLN_HUMAN Methylosome subunit pICln OS=Homo sapiens GN=CLNS1A PE=1 SV=1
0	2.2854	1.16993	0	0	0	0.686358	0.914536	1	1	-0.371826	5.125	1	0	>sp|P54136|SYRC_HUMAN Arginine--tRNA ligase, cytoplasmic OS=Homo sapiens GN=RARS PE=1 SV=2
0	1.77259	1.11548	0	1.62449	1.27302	0.893309	0.972756	2	2	-0.10188	7.08333	2	0	>sp|P54252|ATX3_HUMAN Ataxin-3 OS=Homo sapiens GN=ATXN3 PE=1 SV=4
0	0	1.73697	2.34577	1.62449	2.34577	0.668976	0.905481	2	2	-0.443364	12.5833	2	0	>sp|P54277|PMS1_HUMAN PMS1 protein homolog 1 OS=Homo sapiens GN=PMS1 PE=1 SV=1
1.11548	2.80735	2.70044	1	3.47032	2.56478	0.750695	0.940709	3	3	0.304699	28.6667	1	0	>sp|P54278|PMS2_HUMAN Mismatch repair endonuclease PMS2 OS=Homo sapiens GN=PMS2 PE=1 SV=2
0	0	0.5025	0	1.05889	0	0.163983	0.686745	2	0	0.520465	1.5	1	0	>sp|P54577|SYYC_HUMAN Tyrosine--tRNA ligase, cytoplasmic OS=Homo sapiens GN=YARS PE=1 SV=4
0	0	0	0	1.05889	0	0.373901	0.686745	1	0	0.352965	1.08333	2	0	>sp|P54578|UBP14_HUMAN Ubiquitin carboxyl-terminal hydrolase 14 OS=Homo sapiens GN=USP14 PE=1 SV=3
0	0	0.874469	0	0	2.1964	0.60587	0.876759	1	1	-0.440643	4.41667	2	0	>sp|P54619|AAKG1_HUMAN 5'-AMP-activated protein kinase subunit gamma-1 OS=Homo sapiens GN=PRKAG1 PE=1 SV=1
2.68182	0	0.70044	2.60486	4.4865	4.68416	0.916971	0.972756	3	2	0.193246	57.25	1	0	>sp|P54652|HSP72_HUMAN Heat shock-related 70 kDa protein 2 OS=Homo sapiens GN=HSPA2 PE=1 SV=1
0	0	0	0	0	0	NaN	NaN	0	0	0	0	1	0	>sp|P54687|BCAT1_HUMAN Branched-chain-amino-acid aminotransferase, cytosolic OS=Homo sapiens GN=BCAT1 PE=1 SV=3
0	0	0	0	0	0	NaN	NaN	0	0	0	0	3	0	>sp|P54707|AT12A_HUMAN Potassium-transporting ATPase alpha chain 2 OS=Homo sapiens GN=ATP12A PE=1 SV=3
0.321928	0	0	0	0	0	0.373901	0.686745	1	0	0.107309	0.25	2	0	>sp|P54709|AT1B3_HUMAN Sodium/potassium-transporting ATPase subunit beta-3 OS=Homo sapiens GN=ATP1B3 PE=1 SV=1
3.78136	4.23522	5.26209	2.02975	3.93074	5.25424	0.671496	0.907464	3	3	0.484996	122.458	2	0	>sp|P54725|RD23A_HUMAN UV excision repair protein RAD23 homolog A OS=Homo sapiens GN=RAD23A PE=1 SV=1
1.32193	0.736966	0	1.27302	2.32193	0	0.516878	0.828972	2	2	0.544624	7.58333	1	0	>sp|P54727|RD23B_HUMAN UV excision repair protein RAD23 homolog B OS=Homo sapiens GN=RAD23B PE=1 SV=1
0	0	0	0	0	0	NaN	NaN	0	0	0	0	3	0	>sp|P54792|DVLP1_HUMAN Putative segment polarity protein dishevelled homolog DVL1P1 OS=Homo sapiens GN=DVL1P1 PE=5 SV=1
0.321928	0.736966	1.11548	0	1.05889	0.662965	0.351352	0.686745	3	2	0.365456	3.75	2	0	>sp|P54803|GALC_HUMAN Galactocerebrosidase OS=Homo sapiens GN=GALC PE=1 SV=2
0	0	0	0	2.73697	0	0.373901	0.686745	1	0	0.912322	5.66667	2	0	>sp|P54819|KAD2_HUMAN Adenylate kinase 2, mitochondrial OS=Homo sapiens GN=AK2 PE=1 SV=2
1.73697	0.584963	0	3	0	0	0.600715	0.874881	1	2	-0.615999	9.83333	1	0	>sp|P54886|P5CS_HUMAN Delta-1-pyrroline-5-carboxylate synthase OS=Homo sapiens GN=ALDH18A1 PE=1 SV=2
0.938599	2.32193	0.321928	1.77259	2.32193	2.75489	0.172288	0.686745	3	3	-1.08898	17.3333	2	0	>sp|P54920|SNAA_HUMAN Alpha-soluble NSF attachment protein OS=Homo sapiens GN=NAPA PE=1 SV=3
0	0	1.8413	0.807355	0.736966	0	0.380122	0.691981	2	1	0.590304	4	1	0	>sp|P55010|IF5_HUMAN Eukaryotic translation initiation factor 5 OS=Homo sapiens GN=EIF5 PE=1 SV=2
2.34577	2.58496	2.92283	2.34577	0	0	0.930667	0.972779	2	2	0.112623	19.75	2	0	>sp|P55011|S12A2_HUMAN Solute carrier family 12 member 2 OS=Homo sapiens GN=SLC12A2 PE=1 SV=1
2.1964	2.73697	3.43741	2.71882	4.1964	1.87447	0.268247	0.686745	3	3	0.833316	44.6667	2	0	>sp|P55036|PSMD4_HUMAN 26S proteasome non-ATPase regulatory subunit 4 OS=Homo sapiens GN=PSMD4 PE=1 SV=1
4.20945	2.27302	3.42066	3.30378	3.1565	0	0.165757	0.686745	3	2	1.73661	47.8333	1	0	>sp|P55060|XPO2_HUMAN Exportin-2 OS=Homo sapiens GN=CSE1L PE=1 SV=3
3.9386	3.79874	4.25424	5.19147	5.07325	3.68182	0.754477	0.940709	3	3	0.198018	125.375	1	0	>sp|P55072|TERA_HUMAN Transitional endoplasmic reticulum ATPase OS=Homo sapiens GN=VCP PE=1 SV=4
1.11548	0	1.8413	0	0	0.874469	0.318485	0.686745	2	1	0.694103	4.58333	2	0	>sp|P55084|ECHB_HUMAN Trifunctional enzyme subunit beta, mitochondrial OS=Homo sapiens GN=HADHB PE=1 SV=3
1.32193	0	0	1.77259	0	0	0.848455	0.964759	1	1	-0.15022	3.91667	1	0	>sp|P55160|NCKPL_HUMAN Nck-associated protein 1-like OS=Homo sapiens GN=NCKAP1L PE=1 SV=3
0	0	0	1.77259	2	0	0.936276	0.973856	1	1	0.0758035	5.41667	2	0	>sp|P55209|NP1L1_HUMAN Nucleosome assembly protein 1-like 1 OS=Homo sapiens GN=NAP1L1 PE=1 SV=1
0	0	0	0	0	0	NaN	NaN	0	0	0	0	1	0	>sp|P55263|ADK_HUMAN Adenosine kinase OS=Homo sapiens GN=ADK PE=1 SV=2
0	0	0	0	1.62449	1.27302	0.873042	0.969525	1	1	0.117157	3.5	1	0	>sp|P55265|DSRAD_HUMAN Double-stranded RNA-specific adenosine deaminase OS=Homo sapiens GN=ADAR PE=1 SV=4
0	0	0	0	0	0.5025	0.373901	0.686745	0	1	-0.1675	0.416667	2	0	>sp|P55327|TPD52_HUMAN Tumor protein D52 OS=Homo sapiens GN=TPD52 PE=1 SV=2
1.41504	0.222392	1.8413	0	0	0.5025	0.216257	0.686745	2	2	0.843816	4.83333	2	0	>sp|P55735|SEC13_HUMAN Protein SEC13 homolog OS=Homo sapiens GN=SEC13 PE=1 SV=3
0	0	0	0	0	0	NaN	NaN	0	0	0	0	2	0	>sp|P55786|PSA_HUMAN Puromycin-sensitive aminopeptidase OS=Homo sapiens GN=NPEPPS PE=1 SV=2
0	0	0.874469	0	0	0	0.373901	0.686745	1	0	0.29149	0.833333	1	0	>sp|P55795|HNRH2_HUMAN Heterogeneous nuclear ribonucleoprotein H2 OS=Homo sapiens GN=HNRNPH2 PE=1 SV=1
0	0	0.5025	0.736966	2.32193	1.77259	0.91008	0.972756	2	2	0.104958	7.5	2	0	>sp|P55854|SUMO3_HUMAN Small ubiquitin-related modifier 3 OS=Homo sapiens GN=SUMO3 PE=1 SV=2
2.88264	4.18982	0	2.24793	2.52356	2.02975	0.420398	0.740906	2	3	-1.02043	35.2083	1	0	>sp|P55884|EIF3B_HUMAN Eukaryotic translation initiation factor 3 subunit B OS=Homo sapiens GN=EIF3B PE=1 SV=3
0	1.27302	0.5025	0.736966	0.415037	0	0.414379	0.734201	2	2	-0.364149	2.83333	2	0	>sp|P56134|ATPK_HUMAN ATP synthase subunit f, mitochondrial OS=Homo sapiens GN=ATP5J2 PE=1 SV=3
0	0	0	0	0	0	NaN	NaN	0	0	0	0	1	0	>sp|P56192|SYMC_HUMAN Methionine--tRNA ligase, cytoplasmic OS=Homo sapiens GN=MARS PE=1 SV=2
0	0	0	0	1.05889	0	0.373901	0.686745	1	0	0.352965	1.08333	1	0	>sp|P56385|ATP5I_HUMAN ATP synthase subunit e, mitochondrial OS=Homo sapiens GN=ATP5I PE=1 SV=2
0	0	0	0	0	0	NaN	NaN	0	0	0	0	1	0	>sp|P56537|IF6_HUMAN Eukaryotic translation initiation factor 6 OS=Homo sapiens GN=EIF6 PE=1 SV=1
1.54432	1.27302	0	1.27302	0	0.5025	0.432631	0.756066	1	3	-0.501406	5.16667	1	0	>sp|P56545|CTBP2_HUMAN C-terminal-binding protein 2 OS=Homo sapiens GN=CTBP2 PE=1 SV=1
1.32193	0.736966	1.27302	0	0.415037	0	0.119386	0.686745	3	1	0.757673	3.91667	1	0	>sp|P56589|PEX3_HUMAN Peroxisomal biogenesis factor 3 OS=Homo sapiens GN=PEX3 PE=1 SV=1
0.321928	1.77259	1.73697	1.77259	1.05889	1.77259	0.147141	0.686745	3	3	-0.733327	10.9167	1	0	>sp|P56937|DHB7_HUMAN 3-keto-steroid reductase OS=Homo sapiens GN=HSD17B7 PE=1 SV=1
1.54432	2.9386	2.70044	0	0	0.662965	0.865199	0.969525	2	2	0.214399	14.6667	1	0	>sp|P56962|STX17_HUMAN Syntaxin-17 OS=Homo sapiens GN=STX17 PE=1 SV=2
0	0	1.73697	2.54432	3.22239	0	0.557492	0.853691	2	1	0.805012	15.5	2	0	>sp|P57053|H2BFS_HUMAN Histone H2B type F-S OS=Homo sapiens GN=H2BFS PE=1 SV=2
2.5025	3.06609	0	0	2	1.77259	0.928435	0.972756	2	2	-0.112059	17.4583	2	0	>sp|P57088|TMM33_HUMAN Transmembrane protein 33 OS=Homo sapiens GN=TMEM33 PE=1 SV=2
0.874469	0	1.11548	2.02975	0	0	0.986851	0.995652	2	1	-0.013267	5.08333	2	0	>sp|P57678|GEMI4_HUMAN Gem-associated protein 4 OS=Homo sapiens GN=GEMIN4 PE=1 SV=2
0	0	1.96963	0	3.08746	1.87447	0.388544	0.704077	2	1	1.06087	13.0833	2	0	>sp|P57721|PCBP3_HUMAN Poly(rC)-binding protein 3 OS=Homo sapiens GN=PCBP3 PE=2 SV=2
0	0	0	0	0	0	NaN	NaN	0	0	0	0	1	0.00793651	>sp|P57735|RAB25_HUMAN Ras-related protein Rab-25 OS=Homo sapiens GN=RAB25 PE=1 SV=2
1.27302	0.584963	1.11548	2.73697	0	0	0.753134	0.940709	2	2	-0.311144	8.75	2	0	>sp|P57737|CORO7_HUMAN Coronin-7 OS=Homo sapiens GN=CORO7 PE=1 SV=2
0	1.11548	0.321928	2.08746	1.62449	0	0.620295	0.878706	2	2	-0.41884	6.75	1	0	>sp|P57740|NU107_HUMAN Nuclear pore complex protein Nup107 OS=Homo sapiens GN=NUP107 PE=1 SV=1
1.32193	0	0	1.77259	0	1.27302	0.45031	0.772495	1	2	-0.57456	5.33333	1	0	>sp|P57772|SELB_HUMAN Selenocysteine-specific elongation factor OS=Homo sapiens GN=EEFSEC PE=1 SV=4
0	0	0.5025	0	0	0	0.373901	0.686745	1	0	0.1675	0.416667	1	0.00677966	>sp|P58004|SESN2_HUMAN Sestrin-2 OS=Homo sapiens GN=SESN2 PE=1 SV=1
0	0.736966	0	0	0	0	0.373901	0.686745	0	1	-0.245655	0.666667	2	0.00438596	>sp|P58505|CU058_HUMAN Uncharacterized protein C21orf58 OS=Homo sapiens GN=C21orf58 PE=2 SV=2
0	0	0	0	0	0	NaN	NaN	0	0	0	0	2	0	>sp|P58546|MTPN_HUMAN Myotrophin OS=Homo sapiens GN=MTPN PE=1 SV=2
0	0	1.73697	2.54432	3.22239	0	0.557492	0.853691	2	1	0.805012	15.5	1	0	>sp|P58876|H2B1D_HUMAN Histone H2B type 1-D OS=Homo sapiens GN=HIST1H2BD PE=1 SV=2
0	0	0	0	1.05889	1.27302	0.903351	0.972756	1	1	-0.0713749	2.5	1	0	>sp|P59190|RAB15_HUMAN Ras-related protein Rab-15 OS=Homo sapiens GN=RAB15 PE=1 SV=1
0	0	0	0.736966	0	0	0.373901	0.686745	0	1	-0.245655	0.666667	2	0	>sp|P59665|DEF1_HUMAN Neutrophil defensin 1 OS=Homo sapiens GN=DEFA1 PE=1 SV=1
0	0	0	0.736966	0	0	0.373901	0.686745	0	1	-0.245655	0.666667	2	0	>sp|P59666|DEF3_HUMAN Neutrophil defensin 3 OS=Homo sapiens GN=DEFA3 PE=1 SV=1
0	0	0	0	0	0	NaN	NaN	0	0	0	0	1	0	>sp|P59827|BPIB4_HUMAN BPI fold-containing family B member 4 OS=Homo sapiens GN=BPIFB4 PE=2 SV=2
0.321928	0	0	0	2.16993	1.05889	0.565087	0.857016	2	1	0.477653	4.83333	1	0	>sp|P60174|TPIS_HUMAN Triosephosphate isomerase OS=Homo sapiens GN=TPI1 PE=1 SV=3
1.52356	0	1.58496	2.08746	2.92283	0	0.189332	0.686745	3	1	1.31463	13.7083	1	0	>sp|P60228|EIF3E_HUMAN Eukaryotic translation initiation factor 3 subunit E OS=Homo sapiens GN=EIF3E PE=1 SV=1
0	0	0.5025	0	0	0	0.373901	0.686745	1	0	0.1675	0.416667	1	0	>sp|P60510|PP4C_HUMAN Serine/threonine-protein phosphatase 4 catalytic subunit OS=Homo sapiens GN=PPP4C PE=1 SV=1
0.874469	0	0	0	0	0	0.373901	0.686745	1	0	0.29149	0.833333	1	0	>sp|P60602|ROMO1_HUMAN Reactive oxygen species modulator 1 OS=Homo sapiens GN=ROMO1 PE=1 SV=1
0	0	0	0	1.05889	0	0.373901	0.686745	1	0	0.352965	1.08333	2	0	>sp|P60660|MYL6_HUMAN Myosin light polypeptide 6 OS=Homo sapiens GN=MYL6 PE=1 SV=2
0	3.52878	0	0	0	0	0.373901	0.686745	0	1	-1.17626	10.5417	2	0	>sp|P60709|ACTB_HUMAN Actin, cytoplasmic 1 OS=Homo sapiens GN=ACTB PE=1 SV=1
0	0	0	0	0	0	NaN	NaN	0	0	0	0	3	0	>sp|P60763|RAC3_HUMAN Ras-related C3 botulinum toxin substrate 3 OS=Homo sapiens GN=RAC3 PE=1 SV=1
0	0	0	0	3.91886	4.12584	0.972727	0.991129	1	1	-0.0689936	30.5833	1	0	>sp|P60842|IF4A1_HUMAN Eukaryotic initiation factor 4A-I OS=Homo sapiens GN=EIF4A1 PE=1 SV=1
1.77259	0	1.11548	0	0	0	0.136286	0.686745	2	0	0.962689	3.58333	1	0	>sp|P60891|PRPS1_HUMAN Ribose-phosphate pyrophosphokinase 1 OS=Homo sapiens GN=PRPS1 PE=1 SV=2
2	0	0	0	2.11548	2.58496	0.667419	0.904204	2	1	0.510172	11.3333	2	0	>sp|P60900|PSA6_HUMAN Proteasome subunit alpha type-6 OS=Homo sapiens GN=PSMA6 PE=1 SV=1
0	0	0	0	1.05889	0	0.373901	0.686745	1	0	0.352965	1.08333	1	0	>sp|P60953|CDC42_HUMAN Cell division control protein 42 homolog OS=Homo sapiens GN=CDC42 PE=1 SV=2
0	0	0	0	0.415037	0	0.373901	0.686745	1	0	0.138346	0.333333	2	0	>sp|P60981|DEST_HUMAN Destrin OS=Homo sapiens GN=DSTN PE=1 SV=3
0	0	0	0	0	2.96963	0.373901	0.686745	0	1	-0.989875	6.83333	1	0	>sp|P61006|RAB8A_HUMAN Ras-related protein Rab-8A OS=Homo sapiens GN=RAB8A PE=1 SV=1
0	0	0	0	1.62449	1.27302	0.873042	0.969525	1	1	0.117157	3.5	1	0	>sp|P61009|SPCS3_HUMAN Signal peptidase complex subunit 3 OS=Homo sapiens GN=SPCS3 PE=1 SV=1
3.89885	3.22239	4.82018	3.87447	4.36923	2.16993	0.0865552	0.686745	3	3	1.27383	86.3333	2	0	>sp|P61011|SRP54_HUMAN Signal recognition particle 54 kDa protein OS=Homo sapiens GN=SRP54 PE=1 SV=1
0	0	0	0	0	0	NaN	NaN	0	0	0	0	4	0.0032	>sp|P61018|RAB4B_HUMAN Ras-related protein Rab-4B OS=Homo sapiens GN=RAB4B PE=1 SV=1
0	0	0	0	0	2.02975	0.373901	0.686745	0	1	-0.676582	3.08333	1	0	>sp|P61020|RAB5B_HUMAN Ras-related protein Rab-5B OS=Homo sapiens GN=RAB5B PE=1 SV=1
0	0	0	0	1.62449	0	0.373901	0.686745	1	0	0.541497	2.08333	1	0	>sp|P61026|RAB10_HUMAN Ras-related protein Rab-10 OS=Homo sapiens GN=RAB10 PE=1 SV=1
1.77259	1.27302	1.11548	0	0	0.662965	0.643302	0.888473	2	2	0.317361	5.58333	1	0	>sp|P61073|CXCR4_HUMAN C-X-C chemokine receptor type 4 OS=Homo sapiens GN=CXCR4 PE=1 SV=1
0	0	0	0	1.05889	0	0.373901	0.686745	1	0	0.352965	1.08333	1	0	>sp|P61081|UBC12_HUMAN NEDD8-conjugating enzyme Ubc12 OS=Homo sapiens GN=UBE2M PE=1 SV=1
0	0	0	0	0	1.77259	0.373901	0.686745	0	1	-0.590863	2.41667	1	0	>sp|P61086|UBE2K_HUMAN Ubiquitin-conjugating enzyme E2 K OS=Homo sapiens GN=UBE2K PE=1 SV=3
0	0	0	0	0.415037	0	0.373901	0.686745	1	0	0.138346	0.333333	2	0	>sp|P61088|UBE2N_HUMAN Ubiquitin-conjugating enzyme E2 N OS=Homo sapiens GN=UBE2N PE=1 SV=1
0	0	0	0	1.05889	1.27302	0.903351	0.972756	1	1	-0.0713749	2.5	2	0	>sp|P61106|RAB14_HUMAN Ras-related protein Rab-14 OS=Homo sapiens GN=RAB14 PE=1 SV=4
0	0	0	0.736966	0	2.02975	0.195003	0.686745	0	2	-0.922238	3.75	1	0	>sp|P61158|ARP3_HUMAN Actin-related protein 3 OS=Homo sapiens GN=ACTR3 PE=1 SV=3
2.63421	0	2.82443	0	0	0	0.116599	0.686745	2	0	1.81954	11.2917	1	0	>sp|P61160|ARP2_HUMAN Actin-related protein 2 OS=Homo sapiens GN=ACTR2 PE=1 SV=1
0	0	0.5025	0	0.415037	1.27302	0.80605	0.946645	2	1	-0.118494	2.16667	2	0	>sp|P61163|ACTZ_HUMAN Alpha-centractin OS=Homo sapiens GN=ACTR1A PE=1 SV=1
2.02975	1.27302	1.11548	1.77259	1.05889	2.34577	0.420836	0.741273	3	3	-0.395755	13.25	1	0	>sp|P61201|CSN2_HUMAN COP9 signalosome complex subunit 2 OS=Homo sapiens GN=COPS2 PE=1 SV=1
0	2.05889	0	0	3.22239	0	0.776099	0.942771	1	1	0.387833	11.5	2	0	>sp|P61204|ARF3_HUMAN ADP-ribosylation factor 3 OS=Homo sapiens GN=ARF3 PE=1 SV=2
0	0	0.662965	2.41504	3.08746	0	0.737029	0.939686	2	1	0.44513	12.4167	1	0	>sp|P61221|ABCE1_HUMAN ATP-binding cassette sub-family E member 1 OS=Homo sapiens GN=ABCE1 PE=1 SV=1
0	0	0	0	2	1.27302	0.774415	0.942167	1	1	0.242327	4.41667	2	0	>sp|P61224|RAP1B_HUMAN Ras-related protein Rap-1b OS=Homo sapiens GN=RAP1B PE=1 SV=1
0	0	0	0	0	0	NaN	NaN	0	0	0	0	2	0	>sp|P61247|RS3A_HUMAN 40S ribosomal protein S3a OS=Homo sapiens GN=RPS3A PE=1 SV=2
1.36923	1.27302	0	0	1.62449	0	0.4333	0.756891	2	1	0.573569	5.08333	2	0	>sp|P61289|PSME3_HUMAN Proteasome activator complex subunit 3 OS=Homo sapiens GN=PSME3 PE=1 SV=1
0	0	0	0	0	0	NaN	NaN	0	0	0	0	2	0	>sp|P61313|RL15_HUMAN 60S ribosomal protein L15 OS=Homo sapiens GN=RPL15 PE=1 SV=2
0	0	0	0	1.05889	0	0.373901	0.686745	1	0	0.352965	1.08333	1	0	>sp|P61353|RL27_HUMAN 60S ribosomal protein L27 OS=Homo sapiens GN=RPL27 PE=1 SV=2
0	0	0	0	0	0	NaN	NaN	0	0	0	0	2	0	>sp|P61421|VA0D1_HUMAN V-type proton ATPase subunit d 1 OS=Homo sapiens GN=ATP6V0D1 PE=1 SV=1
0	0	0	0	1.62449	0	0.373901	0.686745	1	0	0.541497	2.08333	2	0	>sp|P61604|CH10_HUMAN 10 kDa heat shock protein, mitochondrial OS=Homo sapiens GN=HSPE1 PE=1 SV=2
1.5025	0.115477	3.9386	3.51307	0	1.27302	0.911539	0.972756	2	3	0.179845	28.0833	2	0	>sp|P61619|S61A1_HUMAN Protein transport protein Sec61 subunit alpha isoform 1 OS=Homo sapiens GN=SEC61A1 PE=1 SV=2
0	0	0	1.5025	0	0	0.373901	0.686745	0	1	-0.500833	1.83333	2	0	>sp|P61626|LYSC_HUMAN Lysozyme C OS=Homo sapiens GN=LYZ PE=1 SV=1
0	0	1.73697	0	1.05889	0	0.138966	0.686745	2	0	0.931953	3.41667	2	0	>sp|P61758|PFD3_HUMAN Prefoldin subunit 3 OS=Homo sapiens GN=VBP1 PE=1 SV=3
0	0	0.5025	0.736966	2.32193	1.77259	0.91008	0.972756	2	2	0.104958	7.5	2	0	>sp|P61956|SUMO2_HUMAN Small ubiquitin-related modifier 2 OS=Homo sapiens GN=SUMO2 PE=1 SV=3
1.36923	0	2.52356	2.41504	2.32193	2.75489	0.729099	0.933089	3	2	0.348266	20.4167	1	0	>sp|P61962|DCAF7_HUMAN DDB1- and CUL4-associated factor 7 OS=Homo sapiens GN=DCAF7 PE=1 SV=1
0	0	0.5025	0	0.415037	1.27302	0.80605	0.946645	2	1	-0.118494	2.16667	1	0	>sp|P61964|WDR5_HUMAN WD repeat-containing protein 5 OS=Homo sapiens GN=WDR5 PE=1 SV=1
0	0	0	0	0	1.39232	0.373901	0.686745	0	1	-0.464106	1.625	1	0	>sp|P61978|HNRPK_HUMAN Heterogeneous nuclear ribonucleoprotein K OS=Homo sapiens GN=HNRNPK PE=1 SV=1
0	0	1.11548	0	0	1.54432	0.832927	0.960144	1	1	-0.142948	3.08333	1	0	>sp|P61981|1433G_HUMAN 14-3-3 protein gamma OS=Homo sapiens GN=YWHAG PE=1 SV=2
0	0	0	0	2.52356	0	0.373901	0.686745	1	0	0.841187	4.75	1	0	>sp|P62081|RS7_HUMAN 40S ribosomal protein S7 OS=Homo sapiens GN=RPS7 PE=1 SV=1
2.73697	1.5025	2.9542	0	0.222392	2.70044	0.652646	0.894649	3	2	0.570205	19.9167	1	0	>sp|P62136|PP1A_HUMAN Serine/threonine-protein phosphatase PP1-alpha catalytic subunit OS=Homo sapiens GN=PPP1CA PE=1 SV=1
2.1964	0.736966	2.92283	0	0	1.70044	0.4249	0.74668	2	2	0.893941	13.0833	1	0	>sp|P62140|PP1B_HUMAN Serine/threonine-protein phosphatase PP1-beta catalytic subunit OS=Homo sapiens GN=PPP1CB PE=1 SV=3
3.14296	0	2.82443	2.87447	4.36923	3.89077	0.397115	0.714684	3	2	1.19046	53.75	1	0	>sp|P62191|PRS4_HUMAN 26S protease regulatory subunit 4 OS=Homo sapiens GN=PSMC1 PE=1 SV=1
4.05528	2.89077	3.16993	1.77259	4.47573	4.64386	0.434691	0.75869	3	3	0.797908	77.7083	1	0	>sp|P62195|PRS8_HUMAN 26S protease regulatory subunit 8 OS=Homo sapiens GN=PSMC5 PE=1 SV=1
0	0	0	0	0.222392	1.36923	0.454846	0.775849	1	1	-0.38228	1.75	2	0	>sp|P62241|RS8_HUMAN 40S ribosomal protein S8 OS=Homo sapiens GN=RPS8 PE=1 SV=2
0	0	0	0	1.05889	0	0.373901	0.686745	1	0	0.352965	1.08333	2	0	>sp|P62244|RS15A_HUMAN 40S ribosomal protein S15a OS=Homo sapiens GN=RPS15A PE=1 SV=2
0	0	0	0	2.32193	0	0.373901	0.686745	1	0	0.773976	4	2	0	>sp|P62249|RS16_HUMAN 40S ribosomal protein S16 OS=Homo sapiens GN=RPS16 PE=1 SV=2
0	0	0	0	0	2.41504	0.373901	0.686745	0	1	-0.805012	4.33333	1	0	>sp|P62258|1433E_HUMAN 14-3-3 protein epsilon OS=Homo sapiens GN=YWHAE PE=1 SV=1
0	0	0.5025	0	2	0	0.237257	0.686745	2	0	0.834167	3.41667	1	0	>sp|P62263|RS14_HUMAN 40S ribosomal protein S14 OS=Homo sapiens GN=RPS14 PE=1 SV=3
0	0	0	0	0.415037	0	0.373901	0.686745	1	0	0.138346	0.333333	1	0	>sp|P62266|RS23_HUMAN 40S ribosomal protein S23 OS=Homo sapiens GN=RPS23 PE=1 SV=3
0	0	3.14296	1.36923	2.73697	1.77259	0.462095	0.783261	2	2	0.9127	17.5	1	0	>sp|P62269|RS18_HUMAN 40S ribosomal protein S18 OS=Homo sapiens GN=RPS18 PE=1 SV=3
0	0	0	0	1.05889	0	0.373901	0.686745	1	0	0.352965	1.08333	1	0	>sp|P62277|RS13_HUMAN 40S ribosomal protein S13 OS=Homo sapiens GN=RPS13 PE=1 SV=2
0	0	0	0	1.62449	0	0.373901	0.686745	1	0	0.541497	2.08333	2	0	>sp|P62280|RS11_HUMAN 40S ribosomal protein S11 OS=Homo sapiens GN=RPS11 PE=1 SV=3
0	0	0	0	1.05889	0	0.373901	0.686745	1	0	0.352965	1.08333	1	0	>sp|P62304|RUXE_HUMAN Small nuclear ribonucleoprotein E OS=Homo sapiens GN=SNRPE PE=1 SV=1
0	0	0	0	0	0	NaN	NaN	0	0	0	0	1	0	>sp|P62306|RUXF_HUMAN Small nuclear ribonucleoprotein F OS=Homo sapiens GN=SNRPF PE=1 SV=1
0	0	0	0	2	1.77259	0.936276	0.973856	1	1	0.0758035	5.41667	2	0	>sp|P62314|SMD1_HUMAN Small nuclear ribonucleoprotein Sm D1 OS=Homo sapiens GN=SNRPD1 PE=1 SV=1
0	0	0	0	2	0	0.373901	0.686745	1	0	0.666667	3	1	0	>sp|P62316|SMD2_HUMAN Small nuclear ribonucleoprotein Sm D2 OS=Homo sapiens GN=SNRPD2 PE=1 SV=1
0	0	0	0	1.05889	0	0.373901	0.686745	1	0	0.352965	1.08333	1	0	>sp|P62318|SMD3_HUMAN Small nuclear ribonucleoprotein Sm D3 OS=Homo sapiens GN=SNRPD3 PE=1 SV=1
0	0	0	0	1.62449	0	0.373901	0.686745	1	0	0.541497	2.08333	1	0	>sp|P62330|ARF6_HUMAN ADP-ribosylation factor 6 OS=Homo sapiens GN=ARF6 PE=1 SV=2
3.71882	1.41504	2.9386	0	3.35755	3.56478	0.188691	0.686745	3	2	1.67838	40.5833	2	0	>sp|P62333|PRS10_HUMAN 26S protease regulatory subunit 10B OS=Homo sapiens GN=PSMC6 PE=1 SV=1
0	0	0	0	0	2.70044	0.373901	0.686745	0	1	-0.900147	5.5	1	0	>sp|P62424|RL7A_HUMAN 60S ribosomal protein L7a OS=Homo sapiens GN=RPL7A PE=1 SV=2
0	0	0	0	0	0	NaN	NaN	0	0	0	0	3	0	>sp|P62491|RB11A_HUMAN Ras-related protein Rab-11A OS=Homo sapiens GN=RAB11A PE=1 SV=3
0	0	0	0	0	0	NaN	NaN	0	0	0	0	2	0	>sp|P62495|ERF1_HUMAN Eukaryotic peptide chain release factor subunit 1 OS=Homo sapiens GN=ETF1 PE=1 SV=3
0	0	2.9542	2.02975	0	1.32193	0.913862	0.972756	1	2	-0.132493	11.3333	1	0	>sp|P62701|RS4X_HUMAN 40S ribosomal protein S4, X isoform OS=Homo sapiens GN=RPS4X PE=1 SV=2
0	0	0.321928	0	0	1.62449	0.475537	0.794651	1	1	-0.434188	2.33333	2	0	>sp|P62714|PP2AB_HUMAN Serine/threonine-protein phosphatase 2A catalytic subunit beta isoform OS=Homo sapiens GN=PPP2CB PE=1 SV=1
0	2.1565	1.41504	2	0	0	0.337452	0.686745	1	2	-0.913822	8.125	1	0	>sp|P62736|ACTA_HUMAN Actin, aortic smooth muscle OS=Homo sapiens GN=ACTA2 PE=1 SV=1
0	0	0	0	1.05889	0	0.373901	0.686745	1	0	0.352965	1.08333	3	0	>sp|P62750|RL23A_HUMAN 60S ribosomal protein L23a OS=Homo sapiens GN=RPL23A PE=1 SV=1
0	0	1.11548	0	2.32193	0	0.162632	0.686745	2	0	1.1458	5.16667	1	0	>sp|P62753|RS6_HUMAN 40S ribosomal protein S6 OS=Homo sapiens GN=RPS6 PE=1 SV=1
0	0	0	2.24793	3.14296	0	0.828195	0.957731	1	1	0.298343	11.5833	1	0	>sp|P62805|H4_HUMAN Histone H4 OS=Homo sapiens GN=HIST1H4A PE=1 SV=2
0	0	1.73697	2.54432	3.22239	0	0.557492	0.853691	2	1	0.805012	15.5	2	0	>sp|P62807|H2B1C_HUMAN Histone H2B type 1-C/E/F/G/I OS=Homo sapiens GN=HIST1H2BC PE=1 SV=4
0	0	0	0	0	1.05889	0.373901	0.686745	0	1	-0.352965	1.08333	2	0	>sp|P62820|RAB1A_HUMAN Ras-related protein Rab-1A OS=Homo sapiens GN=RAB1A PE=1 SV=3
2.24793	0	0	0	0.938599	2.58496	0.861796	0.967968	2	1	0.200521	9.66667	2	0	>sp|P62826|RAN_HUMAN GTP-binding nuclear protein Ran OS=Homo sapiens GN=RAN PE=1 SV=3
0	0	0	0	1.05889	0	0.373901	0.686745	1	0	0.352965	1.08333	2	0	>sp|P62829|RL23_HUMAN 60S ribosomal protein L23 OS=Homo sapiens GN=RPL23 PE=1 SV=1
0	0	0	0	2	1.27302	0.774415	0.942167	1	1	0.242327	4.41667	2	0	>sp|P62834|RAP1A_HUMAN Ras-related protein Rap-1A OS=Homo sapiens GN=RAP1A PE=1 SV=1
0	0	0	0	0	0.662965	0.373901	0.686745	0	1	-0.220988	0.583333	2	0.00886918	>sp|P62847|RS24_HUMAN 40S ribosomal protein S24 OS=Homo sapiens GN=RPS24 PE=1 SV=1
0	0	0	0	2	0	0.373901	0.686745	1	0	0.666667	3	1	0	>sp|P62851|RS25_HUMAN 40S ribosomal protein S25 OS=Homo sapiens GN=RPS25 PE=1 SV=1
0	0	0	0	1.05889	0	0.373901	0.686745	1	0	0.352965	1.08333	1	0	>sp|P62854|RS26_HUMAN 40S ribosomal protein S26 OS=Homo sapiens GN=RPS26 PE=1 SV=3
0	0	0	0	0.415037	0	0.373901	0.686745	1	0	0.138346	0.333333	1	0	>sp|P62857|RS28_HUMAN 40S ribosomal protein S28 OS=Homo sapiens GN=RPS28 PE=1 SV=1
0	0	0	0	2	1.41504	0.823023	0.953637	1	1	0.194988	4.66667	1	0	>sp|P62873|GBB1_HUMAN Guanine nucleotide-binding protein G(I)/G(S)/G(T) subunit beta-1 OS=Homo sapiens GN=GNB1 PE=1 SV=3
0	0	0	0	1.62449	1.77259	0.95384	0.980796	1	1	-0.0493662	4.5	2	0	>sp|P62879|GBB2_HUMAN Guanine nucleotide-binding protein G(I)/G(S)/G(T) subunit beta-2 OS=Homo sapiens GN=GNB2 PE=1 SV=3
0	0	0	0	0.415037	0	0.373901	0.686745	1	0	0.138346	0.333333	2	0	>sp|P62899|RL31_HUMAN 60S ribosomal protein L31 OS=Homo sapiens GN=RPL31 PE=1 SV=1
0	0	0	0.736966	0	0	0.373901	0.686745	0	1	-0.245655	0.666667	1	0	>sp|P62906|RL10A_HUMAN 60S ribosomal protein L10a OS=Homo sapiens GN=RPL10A PE=1 SV=2
0	0	0	0	0.415037	0	0.373901	0.686745	1	0	0.138346	0.333333	2	0	>sp|P62913|RL11_HUMAN 60S ribosomal protein L11 OS=Homo sapiens GN=RPL11 PE=1 SV=2
2	2.56478	0	0	0	0.874469	0.658183	0.899667	1	2	-0.479751	8.75	2	0	>sp|P62917|RL8_HUMAN 60S ribosomal protein L8 OS=Homo sapiens GN=RPL8 PE=1 SV=2
0	0	0	0	0.584963	0	0.373901	0.686745	1	0	0.194988	0.5	1	0	>sp|P62937|PPIA_HUMAN Peptidyl-prolyl cis-trans isomerase A OS=Homo sapiens GN=PPIA PE=1 SV=2
7.7131	7.88162	7.40939	6.88468	7.63662	7.93639	0.960153	0.984386	3	3	0.0188066	1171.79	2	0	>sp|P62979|RS27A_HUMAN Ubiquitin-40S ribosomal protein S27a OS=Homo sapiens GN=RPS27A PE=1 SV=2
7.6987	7.73978	7.70908	7.09891	7.63662	7.93639	0.741451	0.940709	3	3	0.0897769	1205.79	1	0	>sp|P62987|RL40_HUMAN Ubiquitin-60S ribosomal protein L40 OS=Homo sapiens GN=UBA52 PE=1 SV=2
0.321928	0	0	0	1.05889	0	0.215858	0.686745	2	0	0.460274	1.33333	1	0	>sp|P62993|GRB2_HUMAN Growth factor receptor-bound protein 2 OS=Homo sapiens GN=GRB2 PE=1 SV=1
0	0	0	0	0	0.662965	0.373901	0.686745	0	1	-0.220988	0.583333	2	0	>sp|P62995|TRA2B_HUMAN Transformer-2 protein homolog beta OS=Homo sapiens GN=TRA2B PE=1 SV=1
0	0	0	0	1.05889	0	0.373901	0.686745	1	0	0.352965	1.08333	1	0	>sp|P63000|RAC1_HUMAN Ras-related C3 botulinum toxin substrate 1 OS=Homo sapiens GN=RAC1 PE=1 SV=1
0	0	0	0	2	0	0.373901	0.686745	1	0	0.666667	3	2	0	>sp|P63010|AP2B1_HUMAN AP-2 complex subunit beta OS=Homo sapiens GN=AP2B1 PE=1 SV=1
0	0	0	0	0	2.43741	0.373901	0.686745	0	1	-0.812468	4.41667	1	0	>sp|P63092|GNAS2_HUMAN Guanine nucleotide-binding protein G(s) subunit alpha isoforms short OS=Homo sapiens GN=GNAS PE=1 SV=1
1	0	0.874469	0	0	1.62449	0.900568	0.972756	2	1	0.0833261	3.91667	3	0	>sp|P63096|GNAI1_HUMAN Guanine nucleotide-binding protein G(i) subunit alpha-1 OS=Homo sapiens GN=GNAI1 PE=1 SV=2
0	0	0	0	1.11548	0.222392	0.476247	0.795585	1	1	0.297695	1.33333	1	0	>sp|P63104|1433Z_HUMAN 14-3-3 protein zeta/delta OS=Homo sapiens GN=YWHAZ PE=1 SV=1
0	0.222392	0	1.8413	0	0	0.301437	0.686745	0	2	-0.687898	2.75	1	0	>sp|P63151|2ABA_HUMAN Serine/threonine-protein phosphatase 2A 55 kDa regulatory subunit B alpha isoform OS=Homo sapiens GN=PPP2R2A PE=1 SV=1
0	0	2.05889	0	0	2.36923	0.925997	0.972756	1	1	-0.103447	7.33333	2	0	>sp|P63162|RSMN_HUMAN Small nuclear ribonucleoprotein-associated protein N OS=Homo sapiens GN=SNRPN PE=1 SV=1
0	0	0	0	0	0	NaN	NaN	0	0	0	0	1	0	>sp|P63173|RL38_HUMAN 60S ribosomal protein L38 OS=Homo sapiens GN=RPL38 PE=1 SV=2
0	0	0	0	1.05889	0	0.373901	0.686745	1	0	0.352965	1.08333	2	0	>sp|P63208|SKP1_HUMAN S-phase kinase-associated protein 1 OS=Homo sapiens GN=SKP1 PE=1 SV=2
0	0	0	0	1.62449	0	0.373901	0.686745	1	0	0.541497	2.08333	2	0	>sp|P63241|IF5A1_HUMAN Eukaryotic translation initiation factor 5A-1 OS=Homo sapiens GN=EIF5A PE=1 SV=2
1.79008	0	1.90689	0	0	0	0.116513	0.686745	2	0	1.23232	5.20833	2	0	>sp|P63244|GBLP_HUMAN Guanine nucleotide-binding protein subunit beta-2-like 1 OS=Homo sapiens GN=GNB2L1 PE=1 SV=3
0	3.40939	0	0	0	0	0.373901	0.686745	0	1	-1.13646	9.625	1	0	>sp|P63261|ACTG_HUMAN Actin, cytoplasmic 2 OS=Homo sapiens GN=ACTG1 PE=1 SV=1
0	1.87447	0.807355	2	0	0	0.218211	0.686745	1	2	-1.02237	6.41667	1	0	>sp|P63267|ACTH_HUMAN Actin, gamma-enteric smooth muscle OS=Homo sapiens GN=ACTG2 PE=1 SV=1
0	0	0.321928	0	0	1.96963	0.455426	0.776712	1	1	-0.549233	3.16667	1	0	>sp|P67775|PP2AA_HUMAN Serine/threonine-protein phosphatase 2A catalytic subunit alpha isoform OS=Homo sapiens GN=PPP2CA PE=1 SV=1
0	0	0	0	0	0	NaN	NaN	0	0	0	0	2	0	>sp|P67809|YBOX1_HUMAN Nuclease-sensitive element-binding protein 1 OS=Homo sapiens GN=YBX1 PE=1 SV=3
0	0	0	0	2	0	0.373901	0.686745	1	0	0.666667	3	2	0	>sp|P67812|SC11A_HUMAN Signal peptidase complex catalytic subunit SEC11A OS=Homo sapiens GN=SEC11A PE=1 SV=1
0	0	0	0	0	1.27302	0.373901	0.686745	0	1	-0.424339	1.41667	2	0	>sp|P67870|CSK2B_HUMAN Casein kinase II subunit beta OS=Homo sapiens GN=CSNK2B PE=1 SV=1
0	0	0	0	0	0	NaN	NaN	0	0	0	0	1	0	>sp|P67936|TPM4_HUMAN Tropomyosin alpha-4 chain OS=Homo sapiens GN=TPM4 PE=1 SV=3
0	1.87447	0.807355	2	0	0	0.218211	0.686745	1	2	-1.02237	6.41667	2	0	>sp|P68032|ACTC_HUMAN Actin, alpha cardiac muscle 1 OS=Homo sapiens GN=ACTC1 PE=1 SV=1
0	0	0	0	1.62449	0	0.373901	0.686745	1	0	0.541497	2.08333	1	0	>sp|P68036|UB2L3_HUMAN Ubiquitin-conjugating enzyme E2 L3 OS=Homo sapiens GN=UBE2L3 PE=1 SV=1
3.98868	4.74819	4.51307	4.09099	0	0	0.959043	0.983536	2	2	-0.112478	78.625	2	0	>sp|P68104|EF1A1_HUMAN Elongation factor 1-alpha 1 OS=Homo sapiens GN=EEF1A1 PE=1 SV=1
0	1.87447	0.115477	2	0	0	0.125249	0.686745	1	2	-1.253	5.75	2	0	>sp|P68133|ACTS_HUMAN Actin, alpha skeletal muscle OS=Homo sapiens GN=ACTA1 PE=1 SV=1
0	0	1.96963	5.0625	5.53528	5.03709	0.729984	0.933645	2	2	-0.864895	112.542	2	0	>sp|P68363|TBA1B_HUMAN Tubulin alpha-1B chain OS=Homo sapiens GN=TUBA1B PE=1 SV=1
0	0	0	0	3.20294	5.08037	0.770199	0.940709	1	1	-0.625811	41.0417	1	0	>sp|P68366|TBA4A_HUMAN Tubulin alpha-4A chain OS=Homo sapiens GN=TUBA4A PE=1 SV=1
4.30986	0	5.71195	0	0	0	0.123843	0.686745	2	0	3.3406	70.25	1	0	>sp|P68371|TBB4B_HUMAN Tubulin beta-4B chain OS=Homo sapiens GN=TUBB4B PE=1 SV=1
1.77259	0	1.73697	1.27302	0	0	0.360567	0.686745	2	1	0.745512	6.16667	2	0	>sp|P68400|CSK21_HUMAN Casein kinase II subunit alpha OS=Homo sapiens GN=CSNK2A1 PE=1 SV=1
1.54432	1.27302	0	0	3.22239	1.5025	0.558497	0.853691	2	2	0.663731	13.5	2	0	>sp|P68431|H31_HUMAN Histone H3.1 OS=Homo sapiens GN=HIST1H3A PE=1 SV=2
0	0	0	0	0	0.662965	0.373901	0.686745	0	1	-0.220988	0.583333	1	0	>sp|P68543|UBX2A_HUMAN UBX domain-containing protein 2A OS=Homo sapiens GN=UBXN2A PE=2 SV=1
0	2.56478	0	0	0	0	0.373901	0.686745	0	1	-0.854928	4.91667	1	0	>sp|P68871|HBB_HUMAN Hemoglobin subunit beta OS=Homo sapiens GN=HBB PE=1 SV=2
4.69581	4.60979	3.1964	4.29155	3.73697	3.56478	0.630519	0.878706	3	3	-0.278987	98.25	2	0	>sp|P69849|NOMO3_HUMAN Nodal modulator 3 OS=Homo sapiens GN=NOMO3 PE=3 SV=2
1.77259	1.27302	2.70044	2.54432	0	0	0.849538	0.964759	2	2	0.218563	14.1667	1	0	>sp|P69905|HBA_HUMAN Hemoglobin subunit alpha OS=Homo sapiens GN=HBA1 PE=1 SV=2
0.874469	0	2.36923	0	0	0	0.193059	0.686745	2	0	1.08123	5	1	0	>sp|P78316|NOP14_HUMAN Nucleolar protein 14 OS=Homo sapiens GN=NOP14 PE=1 SV=3
0	0	0	1.77259	0	0	0.373901	0.686745	0	1	-0.590863	2.41667	1	0	>sp|P78318|IGBP1_HUMAN Immunoglobulin-binding protein 1 OS=Homo sapiens GN=IGBP1 PE=1 SV=1
4.96578	4.40372	4.58747	5.26053	4.86212	4.67713	0.933271	0.973812	3	3	0.0246626	163.458	2	0	>sp|P78344|IF4G2_HUMAN Eukaryotic translation initiation factor 4 gamma 2 OS=Homo sapiens GN=EIF4G2 PE=1 SV=1
0	0	0	0	0	2.02975	0.373901	0.686745	0	1	-0.676582	3.08333	2	0	>sp|P78346|RPP30_HUMAN Ribonuclease P protein subunit p30 OS=Homo sapiens GN=RPP30 PE=1 SV=1
0	0	0	0	0	0	NaN	NaN	0	0	0	0	1	0	>sp|P78347|GTF2I_HUMAN General transcription factor II-I OS=Homo sapiens GN=GTF2I PE=1 SV=2
0	0	0	0	0	0	NaN	NaN	0	0	0	0	1	0	>sp|P78371|TCPB_HUMAN T-complex protein 1 subunit beta OS=Homo sapiens GN=CCT2 PE=1 SV=4
0.321928	0	0	0	0	0	0.373901	0.686745	1	0	0.107309	0.25	2	0.00656455	>sp|P78381|S35A2_HUMAN UDP-galactose translocator OS=Homo sapiens GN=SLC35A2 PE=1 SV=1
0	0.736966	0	0.736966	0	0	0.116117	0.686745	0	2	-0.49131	1.33333	4	0	>sp|P78385|KRT83_HUMAN Keratin, type II cuticular Hb3 OS=Homo sapiens GN=KRT83 PE=1 SV=2
0	0	0	1.27302	1.05889	0	0.903351	0.972756	1	1	-0.0713749	2.5	2	0	>sp|P78386|KRT85_HUMAN Keratin, type II cuticular Hb5 OS=Homo sapiens GN=KRT85 PE=1 SV=1
1.45943	0	1.22239	1	2.32193	0	0.0474471	0.686745	3	1	1.33458	8.08333	1	0	>sp|P78406|RAE1L_HUMAN mRNA export factor OS=Homo sapiens GN=RAE1 PE=1 SV=1
0	0	1.11548	0	0	0	0.373901	0.686745	1	0	0.371826	1.16667	2	0	>sp|P78410|BT3A2_HUMAN Butyrophilin subfamily 3 member A2 OS=Homo sapiens GN=BTN3A2 PE=1 SV=2
0	0	0	0	0	0	NaN	NaN	0	0	0	0	1	0	>sp|P78417|GSTO1_HUMAN Glutathione S-transferase omega-1 OS=Homo sapiens GN=GSTO1 PE=1 SV=2
5.18818	5.78899	0	4.30986	4.73245	3.47032	0.534539	0.844808	2	3	-1.21618	144.25	1	0	>sp|P78527|PRKDC_HUMAN DNA-dependent protein kinase catalytic subunit OS=Homo sapiens GN=PRKDC PE=1 SV=3
0.321928	1.36923	0	0.736966	0	0	0.220447	0.686745	1	2	-0.594757	2.5	1	0	>sp|P78536|ADA17_HUMAN Disintegrin and metalloproteinase domain-containing protein 17 OS=Homo sapiens GN=ADAM17 PE=1 SV=1
0	0	0	0	0	2.34577	0.373901	0.686745	0	1	-0.781925	4.08333	2	0	>sp|P78559|MAP1A_HUMAN Microtubule-associated protein 1A OS=Homo sapiens GN=MAP1A PE=1 SV=6
0	0	0	0	1.62449	0	0.373901	0.686745	1	0	0.541497	2.08333	2	0	>sp|P79483|DRB3_HUMAN HLA class II histocompatibility antigen, DR beta 3 chain OS=Homo sapiens GN=HLA-DRB3 PE=1 SV=1
0	0	0	0	0	0	NaN	NaN	0	0	0	0	2	0	>sp|P80303|NUCB2_HUMAN Nucleobindin-2 OS=Homo sapiens GN=NUCB2 PE=1 SV=2
0	0	0	0	0	0	NaN	NaN	0	0	0	0	1	0	>sp|P81605|DCD_HUMAN Dermcidin OS=Homo sapiens GN=DCD PE=1 SV=2
0	1.36923	0	0	2	1.77259	0.679473	0.910508	1	2	-0.380608	7	2	0	>sp|P81877|SSBP2_HUMAN Single-stranded DNA-binding protein 2 OS=Homo sapiens GN=SSBP2 PE=1 SV=2
0	0	0	0	0	0	NaN	NaN	0	0	0	0	2	0	>sp|P82650|RT22_HUMAN 28S ribosomal protein S22, mitochondrial OS=Homo sapiens GN=MRPS22 PE=1 SV=1
1.32193	0	1.11548	0	0	0	0.118962	0.686745	2	0	0.812468	2.66667	1	0	>sp|P82673|RT35_HUMAN 28S ribosomal protein S35, mitochondrial OS=Homo sapiens GN=MRPS35 PE=1 SV=1
1.32193	0	0	0	0	0	0.373901	0.686745	1	0	0.440643	1.5	2	0	>sp|P82930|RT34_HUMAN 28S ribosomal protein S34, mitochondrial OS=Homo sapiens GN=MRPS34 PE=1 SV=2
0	0	0	0	0	0	NaN	NaN	0	0	0	0	1	0	>sp|P82933|RT09_HUMAN 28S ribosomal protein S9, mitochondrial OS=Homo sapiens GN=MRPS9 PE=1 SV=2
0.321928	0	0	0	2.32193	0	0.291725	0.686745	2	0	0.881285	4.25	2	0	>sp|P82979|SARNP_HUMAN SAP domain-containing ribonucleoprotein OS=Homo sapiens GN=SARNP PE=1 SV=3
0	0	0	0	0	0	NaN	NaN	0	0	0	0	4	0.0013289	>sp|P83110|HTRA3_HUMAN Serine protease HTRA3 OS=Homo sapiens GN=HTRA3 PE=1 SV=2
0.874469	0	0.5025	0	0	0	0.144293	0.686745	2	0	0.45899	1.25	1	0	>sp|P83436|COG7_HUMAN Conserved oligomeric Golgi complex subunit 7 OS=Homo sapiens GN=COG7 PE=1 SV=1
0	0	0	0.736966	2.32193	0	0.550773	0.853691	1	1	0.528321	4.66667	1	0	>sp|P83731|RL24_HUMAN 60S ribosomal protein L24 OS=Homo sapiens GN=RPL24 PE=1 SV=1
0	0.736966	0	0	0.415037	0	0.722835	0.929125	1	1	-0.107309	1	2	0	>sp|P84022|SMAD3_HUMAN Mothers against decapentaplegic homolog 3 OS=Homo sapiens GN=SMAD3 PE=1 SV=1
0	2.05889	0	0	3.22239	0	0.776099	0.942771	1	1	0.387833	11.5	2	0	>sp|P84077|ARF1_HUMAN ADP-ribosylation factor 1 OS=Homo sapiens GN=ARF1 PE=1 SV=2
0	1.77259	0	0	2.32193	0	0.85999	0.966766	1	1	0.183113	6.41667	2	0	>sp|P84085|ARF5_HUMAN ADP-ribosylation factor 5 OS=Homo sapiens GN=ARF5 PE=1 SV=2
0	0	0	0	0.415037	0	0.373901	0.686745	1	0	0.138346	0.333333	2	0	>sp|P84090|ERH_HUMAN Enhancer of rudimentary homolog OS=Homo sapiens GN=ERH PE=1 SV=1
0	0	0	0	2.32193	0	0.373901	0.686745	1	0	0.773976	4	1	0	>sp|P84095|RHOG_HUMAN Rho-related GTP-binding protein RhoG OS=Homo sapiens GN=RHOG PE=1 SV=1
0	0	0	0	0.415037	2.56478	0.454507	0.775523	1	1	-0.716582	5.25	1	0	>sp|P84103|SRSF3_HUMAN Serine/arginine-rich splicing factor 3 OS=Homo sapiens GN=SRSF3 PE=1 SV=1
1.54432	1.27302	0	0	3.22239	1.5025	0.558497	0.853691	2	2	0.663731	13.5	2	0	>sp|P84243|H33_HUMAN Histone H3.3 OS=Homo sapiens GN=H3F3A PE=1 SV=2
0	0	0	0	0	0	NaN	NaN	0	0	0	0	2	0	>sp|P86790|CCZ1B_HUMAN Vacuolar fusion protein CCZ1 homolog B OS=Homo sapiens GN=CCZ1B PE=1 SV=1
0	0	0	0	0	0	NaN	NaN	0	0	0	0	2	0	>sp|P86791|CCZ1_HUMAN Vacuolar fusion protein CCZ1 homolog OS=Homo sapiens GN=CCZ1 PE=1 SV=1
0.736966	2.58496	0	1.8413	1.62449	0	0.487263	0.807194	2	2	-0.688269	10.3333	1	0	>sp|P98171|RHG04_HUMAN Rho GTPase-activating protein 4 OS=Homo sapiens GN=ARHGAP4 PE=1 SV=2
0	0	0	0	0	0	NaN	NaN	0	0	0	0	2	0.00597907	>sp|P98175|RBM10_HUMAN RNA-binding protein 10 OS=Homo sapiens GN=RBM10 PE=1 SV=3
0.874469	2.05889	1.73697	2.02975	0	0	0.591805	0.874881	2	2	-0.492402	9.41667	2	0	>sp|P98194|AT2C1_HUMAN Calcium-transporting ATPase type 2C member 1 OS=Homo sapiens GN=ATP2C1 PE=1 SV=3
0.321928	0.662965	0	2.02975	0	0	0.262939	0.686745	1	2	-0.790261	3.91667	2	0	>sp|Q00005|2ABB_HUMAN Serine/threonine-protein phosphatase 2A 55 kDa regulatory subunit B beta isoform OS=Homo sapiens GN=PPP2R2B PE=1 SV=1
5.04439	4.01123	3.30986	1.62449	3.43741	4.67713	0.672278	0.907464	3	3	0.492935	92.5417	1	0	>sp|Q00325|MPCP_HUMAN Phosphate carrier protein, mitochondrial OS=Homo sapiens GN=SLC25A3 PE=1 SV=2
2.1964	3.02975	3.14296	2.68182	3.47032	2.02975	0.500553	0.818493	3	3	0.356119	37.1667	1	0	>sp|Q00403|TF2B_HUMAN Transcription initiation factor IIB OS=Homo sapiens GN=GTF2B PE=1 SV=1
2.16993	0.736966	1.90689	0	1.36923	0.807355	0.0204607	0.686745	3	2	1.30058	9.25	2	0	>sp|Q00526|CDK3_HUMAN Cyclin-dependent kinase 3 OS=Homo sapiens GN=CDK3 PE=1 SV=1
1.11548	0	0.321928	0	0.415037	1.27302	0.715061	0.929125	3	1	0.193141	3.16667	3	0	>sp|Q00534|CDK6_HUMAN Cyclin-dependent kinase 6 OS=Homo sapiens GN=CDK6 PE=1 SV=1
2.70044	0	2.16993	0	0	2.43741	0.522532	0.834861	2	1	0.810986	13.4167	1	0	>sp|Q00535|CDK5_HUMAN Cyclin-dependent-like kinase 5 OS=Homo sapiens GN=CDK5 PE=1 SV=3
1.5025	0	0	0	0.415037	1.27302	0.745262	0.940709	2	1	0.21484	3.58333	2	0	>sp|Q00536|CDK16_HUMAN Cyclin-dependent kinase 16 OS=Homo sapiens GN=CDK16 PE=1 SV=1
1.11548	0	1.16993	0	0.415037	1.27302	0.385661	0.699938	3	1	0.475807	4.16667	2	0	>sp|Q00537|CDK17_HUMAN Cyclin-dependent kinase 17 OS=Homo sapiens GN=CDK17 PE=1 SV=2
4.58996	4.98868	4.81805	4.14975	0	0	0.969381	0.989316	2	2	0.0898603	97.7917	2	0	>sp|Q00610|CLH1_HUMAN Clathrin heavy chain 1 OS=Homo sapiens GN=CLTC PE=1 SV=5
0.874469	0	0	0	0	0	0.373901	0.686745	1	0	0.29149	0.833333	1	0	>sp|Q00653|NFKB2_HUMAN Nuclear factor NF-kappa-B p100 subunit OS=Homo sapiens GN=NFKB2 PE=1 SV=4
0	0	0	0	0	0	NaN	NaN	0	0	0	0	1	0	>sp|Q00688|FKBP3_HUMAN Peptidyl-prolyl cis-trans isomerase FKBP3 OS=Homo sapiens GN=FKBP3 PE=1 SV=1
0	0	0.874469	0.115477	0	2.70044	0.524186	0.836233	1	2	-0.647149	6.41667	1	0	>sp|Q00796|DHSO_HUMAN Sorbitol dehydrogenase OS=Homo sapiens GN=SORD PE=1 SV=4
0	0	1.87447	0	0	0.415037	0.489491	0.810121	1	1	0.486477	3	1	0	>sp|Q00839|HNRPU_HUMAN Heterogeneous nuclear ribonucleoprotein U OS=Homo sapiens GN=HNRNPU PE=1 SV=6
0	1.27302	2.05889	0	0.415037	1.77259	0.827799	0.957556	2	2	-0.190559	7.33333	1	0	>sp|Q01081|U2AF1_HUMAN Splicing factor U2AF 35 kDa subunit OS=Homo sapiens GN=U2AF1 PE=1 SV=3
3.79008	0	0	1.73697	1.89077	0	0.348093	0.686745	2	1	1.31463	17.875	1	0	>sp|Q01082|SPTB2_HUMAN Spectrin beta chain, non-erythrocytic 1 OS=Homo sapiens GN=SPTBN1 PE=1 SV=2
0	0	2.36923	0	1.62449	0	0.129761	0.686745	2	0	1.33124	6.25	1	0	>sp|Q01085|TIAR_HUMAN Nucleolysin TIAR OS=Homo sapiens GN=TIAL1 PE=1 SV=1
0	0	0	0	2	0	0.373901	0.686745	1	0	0.666667	3	2	0	>sp|Q01105|SET_HUMAN Protein SET OS=Homo sapiens GN=SET PE=1 SV=3
0	0	0	0	0	0	NaN	NaN	0	0	0	0	2	0	>sp|Q01130|SRSF2_HUMAN Serine/arginine-rich splicing factor 2 OS=Homo sapiens GN=SRSF2 PE=1 SV=4
0	0	0	0.736966	0	0	0.373901	0.686745	0	1	-0.245655	0.666667	2	0.00161681	>sp|Q01167|FOXK2_HUMAN Forkhead box protein K2 OS=Homo sapiens GN=FOXK2 PE=1 SV=3
0	0.736966	0	0	0	0	0.373901	0.686745	0	1	-0.245655	0.666667	2	0.00162206	>sp|Q01196|RUNX1_HUMAN Runt-related transcription factor 1 OS=Homo sapiens GN=RUNX1 PE=1 SV=3
0.874469	1.27302	0	0	1.05889	0	0.702092	0.925058	2	1	0.220115	3.33333	1	0	>sp|Q01201|RELB_HUMAN Transcription factor RelB OS=Homo sapiens GN=RELB PE=1 SV=2
0	0	0	0	0	0	NaN	NaN	0	0	0	0	1	0	>sp|Q01469|FABP5_HUMAN Fatty acid-binding protein, epidermal OS=Homo sapiens GN=FABP5 PE=1 SV=3
0	0	0	0	0.415037	0	0.373901	0.686745	1	0	0.138346	0.333333	1	0	>sp|Q01518|CAP1_HUMAN Adenylyl cyclase-associated protein 1 OS=Homo sapiens GN=CAP1 PE=1 SV=5
0	0	0	0	0	0	NaN	NaN	0	0	0	0	2	0	>sp|Q01546|K22O_HUMAN Keratin, type II cytoskeletal 2 oral OS=Homo sapiens GN=KRT76 PE=1 SV=2
3.58496	1.77259	0	1	0.938599	2.02975	0.937698	0.974679	2	3	-0.092925	18.4167	1	0	>sp|Q01650|LAT1_HUMAN Large neutral amino acids transporter small subunit 1 OS=Homo sapiens GN=SLC7A5 PE=1 SV=2
0	0	0	0	1.05889	0	0.373901	0.686745	1	0	0.352965	1.08333	1	0.00119832	>sp|Q01664|TFAP4_HUMAN Transcription factor AP-4 OS=Homo sapiens GN=TFAP4 PE=1 SV=2
0	0	0.5025	0	0	0	0.373901	0.686745	1	0	0.1675	0.416667	1	0	>sp|Q01780|EXOSX_HUMAN Exosome component 10 OS=Homo sapiens GN=EXOSC10 PE=1 SV=2
1.73697	1.90689	2.52356	0	0	0	0.468112	0.786206	2	1	0.784546	9.83333	1	0	>sp|Q01813|PFKAP_HUMAN ATP-dependent 6-phosphofructokinase, platelet type OS=Homo sapiens GN=PFKP PE=1 SV=2
0.874469	0	1.11548	1	0	0	0.525765	0.837483	2	1	0.329982	3	2	0	>sp|Q01814|AT2B2_HUMAN Plasma membrane calcium-transporting ATPase 2 OS=Homo sapiens GN=ATP2B2 PE=1 SV=2
0	0	1.8413	0.807355	0	0	0.634173	0.879826	1	1	0.344649	3.33333	2	0	>sp|Q01844|EWS_HUMAN RNA-binding protein EWS OS=Homo sapiens GN=EWSR1 PE=1 SV=1
0	2.05889	0.5025	1.27302	0	0	0.204514	0.686745	1	2	-0.943137	5	1	0	>sp|Q02078|MEF2A_HUMAN Myocyte-specific enhancer factor 2A OS=Homo sapiens GN=MEF2A PE=1 SV=1
1.77259	0	1.73697	0	0	0	0.116158	0.686745	2	0	1.16985	4.75	2	0	>sp|Q02080|MEF2B_HUMAN Myocyte-specific enhancer factor 2B OS=Homo sapiens GN=MEF2B PE=1 SV=2
1.32193	1.27302	1.11548	0	0	0	0.546867	0.853691	2	1	0.388129	4.08333	1	0	>sp|Q02127|PYRD_HUMAN Dihydroorotate dehydrogenase (quinone), mitochondrial OS=Homo sapiens GN=DHODH PE=1 SV=3
0	0	1.16993	0	0	0	0.373901	0.686745	1	0	0.389975	1.25	2	0	>sp|Q02218|ODO1_HUMAN 2-oxoglutarate dehydrogenase, mitochondrial OS=Homo sapiens GN=OGDH PE=1 SV=3
0	0	0	0	0.415037	0	0.373901	0.686745	1	0	0.138346	0.333333	1	0.00434075	>sp|Q02318|CP27A_HUMAN Sterol 26-hydroxylase, mitochondrial OS=Homo sapiens GN=CYP27A1 PE=1 SV=1
0	0	2.52356	1.96963	0	2.05889	0.665486	0.904204	1	2	-0.501653	10.8333	2	0	>sp|Q02338|BDH_HUMAN D-beta-hydroxybutyrate dehydrogenase, mitochondrial OS=Homo sapiens GN=BDH1 PE=1 SV=3
0	0	0	3.01495	0	0	0.373901	0.686745	0	1	-1.00498	7.08333	1	0	>sp|Q02413|DSG1_HUMAN Desmoglein-1 OS=Homo sapiens GN=DSG1 PE=1 SV=2
0	0	0	0	0	0.662965	0.373901	0.686745	0	1	-0.220988	0.583333	1	0	>sp|Q02539|H11_HUMAN Histone H1.1 OS=Homo sapiens GN=HIST1H1A PE=1 SV=3
1.32193	1.27302	0.5025	0.736966	0.415037	0	0.878246	0.971961	3	2	0.0764939	4.33333	2	0	>sp|Q02548|PAX5_HUMAN Paired box protein Pax-5 OS=Homo sapiens GN=PAX5 PE=1 SV=1
0	0	0	0	1.62449	2.75489	0.741593	0.940709	1	1	-0.376799	7.83333	1	0	>sp|Q02750|MP2K1_HUMAN Dual specificity mitogen-activated protein kinase kinase 1 OS=Homo sapiens GN=MAP2K1 PE=1 SV=2
0	0	0	0	2.32193	0	0.373901	0.686745	1	0	0.773976	4	1	0	>sp|Q02790|FKBP4_HUMAN Peptidyl-prolyl cis-trans isomerase FKBP4 OS=Homo sapiens GN=FKBP4 PE=1 SV=3
0	0	0	0	0	0	NaN	NaN	0	0	0	0	1	0	>sp|Q02878|RL6_HUMAN 60S ribosomal protein L6 OS=Homo sapiens GN=RPL6 PE=1 SV=3
0	0	0	0	2.32193	0	0.373901	0.686745	1	0	0.773976	4	1	0.00522876	>sp|Q02880|TOP2B_HUMAN DNA topoisomerase 2-beta OS=Homo sapiens GN=TOP2B PE=1 SV=3
0	0	4.39803	2.84967	1.87447	1.58496	0.707101	0.927629	2	2	0.612624	30.9583	1	0	>sp|Q02978|M2OM_HUMAN Mitochondrial 2-oxoglutarate/malate carrier protein OS=Homo sapiens GN=SLC25A11 PE=1 SV=3
1	0	0	0	0	0.874469	0.929259	0.972756	1	1	0.0418436	1.83333	1	0	>sp|Q03013|GSTM4_HUMAN Glutathione S-transferase Mu 4 OS=Homo sapiens GN=GSTM4 PE=1 SV=3
0	0	0	0.736966	0	0	0.373901	0.686745	0	1	-0.245655	0.666667	1	0.00764331	>sp|Q03014|HHEX_HUMAN Hematopoietically-expressed homeobox protein HHEX OS=Homo sapiens GN=HHEX PE=1 SV=1
1.54432	0	0	0	0	1.05889	0.808243	0.946645	1	1	0.161809	3	1	0	>sp|Q03113|GNA12_HUMAN Guanine nucleotide-binding protein subunit alpha-12 OS=Homo sapiens GN=GNA12 PE=1 SV=4
0	0	0	0	3.73697	3.35755	0.943424	0.978486	1	1	0.126471	21.5833	2	0	>sp|Q03252|LMNB2_HUMAN Lamin-B2 OS=Homo sapiens GN=LMNB2 PE=1 SV=4
2.63421	2.39232	3.36923	2.68182	0.584963	1.87447	0.896415	0.972756	3	3	-0.120069	27.375	1	0	>sp|Q03518|TAP1_HUMAN Antigen peptide transporter 1 OS=Homo sapiens GN=TAP1 PE=1 SV=2
2.5025	2.98489	2.9542	0	2.60486	3.08746	0.551722	0.853691	3	2	0.663068	30.9167	2	0	>sp|Q03519|TAP2_HUMAN Antigen peptide transporter 2 OS=Homo sapiens GN=TAP2 PE=1 SV=1
0	0	0	0	1.05889	0	0.373901	0.686745	1	0	0.352965	1.08333	2	0	>sp|Q04206|TF65_HUMAN Transcription factor p65 OS=Homo sapiens GN=RELA PE=1 SV=2
0.807355	0	2.71882	1.45943	2.73697	0	0.117259	0.686745	3	1	1.60124	13.75	2	0	>sp|Q04323|UBXN1_HUMAN UBX domain-containing protein 1 OS=Homo sapiens GN=UBXN1 PE=1 SV=2
0	0	0	0	0	0	NaN	NaN	0	0	0	0	2	0	>sp|Q04446|GLGB_HUMAN 1,4-alpha-glucan-branching enzyme OS=Homo sapiens GN=GBE1 PE=1 SV=3
0	0	0	0	1.62449	0	0.373901	0.686745	1	0	0.541497	2.08333	2	0	>sp|Q04637|IF4G1_HUMAN Eukaryotic translation initiation factor 4 gamma 1 OS=Homo sapiens GN=EIF4G1 PE=1 SV=4
0	0	0	0	0	0	NaN	NaN	0	0	0	0	3	0	>sp|Q04695|K1C17_HUMAN Keratin, type I cytoskeletal 17 OS=Homo sapiens GN=KRT17 PE=1 SV=2
0	0	0	1.27302	0	0	0.373901	0.686745	0	1	-0.424339	1.41667	2	0	>sp|Q04724|TLE1_HUMAN Transducin-like enhancer protein 1 OS=Homo sapiens GN=TLE1 PE=1 SV=2
0	0	0	0.736966	0	0	0.373901	0.686745	0	1	-0.245655	0.666667	3	0	>sp|Q04725|TLE2_HUMAN Transducin-like enhancer protein 2 OS=Homo sapiens GN=TLE2 PE=1 SV=2
1.9386	0	0	2.02975	1.05889	1.27302	0.906701	0.972756	2	2	-0.101758	8.41667	2	0	>sp|Q04726|TLE3_HUMAN Transducin-like enhancer protein 3 OS=Homo sapiens GN=TLE3 PE=1 SV=2
0	0	0	0.736966	0	0	0.373901	0.686745	0	1	-0.245655	0.666667	2	0	>sp|Q04727|TLE4_HUMAN Transducin-like enhancer protein 4 OS=Homo sapiens GN=TLE4 PE=1 SV=3
0	0	0	0	0	0	NaN	NaN	0	0	0	0	1	0	>sp|Q04760|LGUL_HUMAN Lactoylglutathione lyase OS=Homo sapiens GN=GLO1 PE=1 SV=4
0	0	0	0	0	0	NaN	NaN	0	0	0	0	2	0	>sp|Q04826|1B40_HUMAN HLA class I histocompatibility antigen, B-40 alpha chain OS=Homo sapiens GN=HLA-B PE=1 SV=1
0	0	0	0	2.32193	0	0.373901	0.686745	1	0	0.773976	4	1	0	>sp|Q04837|SSBP_HUMAN Single-stranded DNA-binding protein, mitochondrial OS=Homo sapiens GN=SSBP1 PE=1 SV=1
0	0	0	0	0	0	NaN	NaN	0	0	0	0	1	0	>sp|Q04917|1433F_HUMAN 14-3-3 protein eta OS=Homo sapiens GN=YWHAH PE=1 SV=4
0	0	0	0	0	0	NaN	NaN	0	0	0	0	2	0	>sp|Q05048|CSTF1_HUMAN Cleavage stimulation factor subunit 1 OS=Homo sapiens GN=CSTF1 PE=1 SV=1
3.23522	3.14296	2.70044	0	4.00749	3.24793	0.354257	0.686745	3	2	1.18409	45.3333	1	0	>sp|Q05086|UBE3A_HUMAN Ubiquitin-protein ligase E3A OS=Homo sapiens GN=UBE3A PE=1 SV=4
0	0	0	0	1.45943	1.41504	0.983622	0.993171	1	1	0.014798	3.41667	2	0	>sp|Q05193|DYN1_HUMAN Dynamin-1 OS=Homo sapiens GN=DNM1 PE=1 SV=2
0	0	0	0.736966	0	0	0.373901	0.686745	0	1	-0.245655	0.666667	2	0	>sp|Q05209|PTN12_HUMAN Tyrosine-protein phosphatase non-receptor type 12 OS=Homo sapiens GN=PTPN12 PE=1 SV=3
0	0	1.11548	2.73697	0	0	0.612446	0.878706	1	1	-0.540496	6.83333	1	0	>sp|Q05469|LIPS_HUMAN Hormone-sensitive lipase OS=Homo sapiens GN=LIPE PE=1 SV=4
0.369234	3.29768	3.27922	3.10154	0	0	0.57126	0.860399	2	2	-0.91692	25.4167	1	0	>sp|Q05639|EF1A2_HUMAN Elongation factor 1-alpha 2 OS=Homo sapiens GN=EEF1A2 PE=1 SV=1
0	0	0	0	1.05889	0	0.373901	0.686745	1	0	0.352965	1.08333	1	0.00160385	>sp|Q05655|KPCD_HUMAN Protein kinase C delta type OS=Homo sapiens GN=PRKCD PE=1 SV=2
0.874469	0	1.11548	1.27302	1.05889	0.662965	0.378247	0.689681	3	2	0.370952	5.08333	1	0	>sp|Q05823|RN5A_HUMAN 2-5A-dependent ribonuclease OS=Homo sapiens GN=RNASEL PE=1 SV=2
1.77259	0	2.52356	2.1964	0.736966	0	0.351185	0.686745	3	1	0.945573	11.4167	1	0	>sp|Q05932|FOLC_HUMAN Folylpolyglutamate synthase, mitochondrial OS=Homo sapiens GN=FPGS PE=1 SV=3
0	0	0	0	0	0	NaN	NaN	0	0	0	0	1	0	>sp|Q06124|PTN11_HUMAN Tyrosine-protein phosphatase non-receptor type 11 OS=Homo sapiens GN=PTPN11 PE=1 SV=2
2.02975	2.05889	1.8413	1.27302	1.05889	1.27302	0.798048	0.946645	3	3	0.108338	12.75	1	0	>sp|Q06136|KDSR_HUMAN 3-ketodihydrosphingosine reductase OS=Homo sapiens GN=KDSR PE=1 SV=1
0	0	0	0	0	0	NaN	NaN	0	0	0	0	2	0	>sp|Q06187|BTK_HUMAN Tyrosine-protein kinase BTK OS=Homo sapiens GN=BTK PE=1 SV=3
0	0	0	0	1.05889	0	0.373901	0.686745	1	0	0.352965	1.08333	1	0	>sp|Q06203|PUR1_HUMAN Amidophosphoribosyltransferase OS=Homo sapiens GN=PPAT PE=1 SV=1
0	0	0	0	3.01495	2.36923	0.874442	0.969641	1	1	0.215239	11.25	1	0	>sp|Q06210|GFPT1_HUMAN Glutamine--fructose-6-phosphate aminotransferase [isomerizing] 1 OS=Homo sapiens GN=GFPT1 PE=1 SV=3
0	0	0.5025	0	0.415037	1.27302	0.80605	0.946645	2	1	-0.118494	2.16667	2	0	>sp|Q06265|EXOS9_HUMAN Exosome complex component RRP45 OS=Homo sapiens GN=EXOSC9 PE=1 SV=3
0	0	1.90689	0	0	0.584963	0.543728	0.851907	1	1	0.440643	3.25	1	0	>sp|Q06323|PSME1_HUMAN Proteasome activator complex subunit 1 OS=Homo sapiens GN=PSME1 PE=1 SV=1
0	1.77259	0	1.77259	0	0	0.116117	0.686745	0	2	-1.18173	4.83333	2	0	>sp|Q06413|MEF2C_HUMAN Myocyte-specific enhancer factor 2C OS=Homo sapiens GN=MEF2C PE=1 SV=1
0.321928	0	1.11548	1.77259	0	0	0.877009	0.971265	2	1	-0.111728	3.83333	1	0	>sp|Q06587|RING1_HUMAN E3 ubiquitin-protein ligase RING1 OS=Homo sapiens GN=RING1 PE=1 SV=2
0	0	0	0	0	0	NaN	NaN	0	0	0	0	1	0	>sp|Q06609|RAD51_HUMAN DNA repair protein RAD51 homolog 1 OS=Homo sapiens GN=RAD51 PE=1 SV=1
0	0	0	0	0.415037	0	0.373901	0.686745	1	0	0.138346	0.333333	4	0.00157978	>sp|Q06787|FMR1_HUMAN Fragile X mental retardation protein 1 OS=Homo sapiens GN=FMR1 PE=1 SV=1
0	0	0	0	0	2.58496	0.373901	0.686745	0	1	-0.861654	5	2	0	>sp|Q06830|PRDX1_HUMAN Peroxiredoxin-1 OS=Homo sapiens GN=PRDX1 PE=1 SV=1
0	0.222392	0	0	2	0	0.426938	0.74851	1	1	0.592536	3.16667	3	0	>sp|Q07000|1C15_HUMAN HLA class I histocompatibility antigen, Cw-15 alpha chain OS=Homo sapiens GN=HLA-C PE=1 SV=1
1.11548	0	1.8413	0	0.415037	1.27302	0.302242	0.686745	3	1	0.699599	5.5	1	0	>sp|Q07002|CDK18_HUMAN Cyclin-dependent kinase 18 OS=Homo sapiens GN=CDK18 PE=1 SV=3
0	0	0	0.736966	0	0	0.373901	0.686745	0	1	-0.245655	0.666667	2	0	>sp|Q07020|RL18_HUMAN 60S ribosomal protein L18 OS=Homo sapiens GN=RPL18 PE=1 SV=2
0.321928	2.34577	1.11548	0	2	1.77259	0.804069	0.946645	3	2	-0.226986	10.9167	1	0	>sp|Q07021|C1QBP_HUMAN Complement component 1 Q subcomponent-binding protein, mitochondrial OS=Homo sapiens GN=C1QBP PE=1 SV=1
0	0	0	0	0	0	NaN	NaN	0	0	0	0	1	0	>sp|Q07065|CKAP4_HUMAN Cytoskeleton-associated protein 4 OS=Homo sapiens GN=CKAP4 PE=1 SV=2
0	0	0	0	1.62449	0	0.373901	0.686745	1	0	0.541497	2.08333	1	0	>sp|Q07666|KHDR1_HUMAN KH domain-containing, RNA-binding, signal transduction-associated protein 1 OS=Homo sapiens GN=KHDRBS1 PE=1 SV=1
0	0	0.5025	0	0	1.27302	0.603498	0.874881	1	1	-0.256839	1.83333	2	0	>sp|Q07817|B2CL1_HUMAN Bcl-2-like protein 1 OS=Homo sapiens GN=BCL2L1 PE=1 SV=1
1.32193	1.27302	0	0	0	1.77259	0.45031	0.772495	1	2	-0.57456	5.33333	2	0	>sp|Q07866|KLC1_HUMAN Kinesin light chain 1 OS=Homo sapiens GN=KLC1 PE=1 SV=2
0	0	0	0	1.05889	0	0.373901	0.686745	1	0	0.352965	1.08333	2	0	>sp|Q07955|SRSF1_HUMAN Serine/arginine-rich splicing factor 1 OS=Homo sapiens GN=SRSF1 PE=1 SV=2
0	0	0	1.77259	0	0	0.373901	0.686745	0	1	-0.590863	2.41667	3	0	>sp|Q08043|ACTN3_HUMAN Alpha-actinin-3 OS=Homo sapiens GN=ACTN3 PE=1 SV=2
0	0	1.11548	0	0	0	0.373901	0.686745	1	0	0.371826	1.16667	1	0	>sp|Q08116|RGS1_HUMAN Regulator of G-protein signaling 1 OS=Homo sapiens GN=RGS1 PE=1 SV=3
0	0	0.5025	3.39232	0	0	0.446848	0.769568	1	1	-0.963272	9.91667	1	0	>sp|Q08188|TGM3_HUMAN Protein-glutamine gamma-glutamyltransferase E OS=Homo sapiens GN=TGM3 PE=1 SV=4
1.11548	0	2.57491	2.29768	2.24793	2.70044	0.758093	0.940709	3	2	0.313398	19.2917	1	0	>sp|Q08209|PP2BA_HUMAN Serine/threonine-protein phosphatase 2B catalytic subunit alpha isoform OS=Homo sapiens GN=PPP3CA PE=1 SV=1
0	0	0	0	3.36923	0	0.373901	0.686745	1	0	1.12308	9.33333	1	0	>sp|Q08211|DHX9_HUMAN ATP-dependent RNA helicase A OS=Homo sapiens GN=DHX9 PE=1 SV=4
0	0	0	0	0	0.662965	0.373901	0.686745	0	1	-0.220988	0.583333	1	0.00123993	>sp|Q08257|QOR_HUMAN Quinone oxidoreductase OS=Homo sapiens GN=CRYZ PE=1 SV=1
0	0	0	0	0	1.27302	0.373901	0.686745	0	1	-0.424339	1.41667	2	0	>sp|Q08431|MFGM_HUMAN Lactadherin OS=Homo sapiens GN=MFGE8 PE=1 SV=2
2.02975	0	0	0	0	0	0.373901	0.686745	1	0	0.676582	3.08333	1	0	>sp|Q08554|DSC1_HUMAN Desmocollin-1 OS=Homo sapiens GN=DSC1 PE=1 SV=2
1.32193	1.77259	3.68182	0.736966	1.62449	1.27302	0.30105	0.686745	3	3	0.948556	19.9167	1	0	>sp|Q08752|PPID_HUMAN Peptidyl-prolyl cis-trans isomerase D OS=Homo sapiens GN=PPID PE=1 SV=3
0	0	0	0	0	0	NaN	NaN	0	0	0	0	1	0	>sp|Q08945|SSRP1_HUMAN FACT complex subunit SSRP1 OS=Homo sapiens GN=SSRP1 PE=1 SV=1
0	1.27302	0	0	0	0	0.373901	0.686745	0	1	-0.424339	1.41667	1	0.00333611	>sp|Q08AF3|SLFN5_HUMAN Schlafen family member 5 OS=Homo sapiens GN=SLFN5 PE=1 SV=1
1.8413	1.82443	0	2.54432	2	0	0.868021	0.969525	2	2	-0.175816	12.9583	1	0	>sp|Q08AM6|VAC14_HUMAN Protein VAC14 homolog OS=Homo sapiens GN=VAC14 PE=1 SV=1
0.321928	0	0	0	1.05889	0	0.215858	0.686745	2	0	0.460274	1.33333	1	0	>sp|Q08J23|NSUN2_HUMAN tRNA (cytosine(34)-C(5))-methyltransferase OS=Homo sapiens GN=NSUN2 PE=1 SV=2
0	0	0	0	1.8413	0	0.373901	0.686745	1	0	0.613767	2.58333	1	0	>sp|Q09028|RBBP4_HUMAN Histone-binding protein RBBP4 OS=Homo sapiens GN=RBBP4 PE=1 SV=3
0	1.05889	0	0	2.32193	0	0.646607	0.891117	1	1	0.421011	5.08333	1	0	>sp|Q09160|1A80_HUMAN HLA class I histocompatibility antigen, A-80 alpha chain OS=Homo sapiens GN=HLA-A PE=1 SV=1
0	0	0	0	0	0	NaN	NaN	0	0	0	0	1	0	>sp|Q09161|NCBP1_HUMAN Nuclear cap-binding protein subunit 1 OS=Homo sapiens GN=NCBP1 PE=1 SV=1
0	3.42626	0	0	3.22239	2.56478	0.568574	0.859346	1	2	-0.922886	23	1	0	>sp|Q09472|EP300_HUMAN Histone acetyltransferase p300 OS=Homo sapiens GN=EP300 PE=1 SV=2
0	0	0	0	5.66415	0	0.373901	0.686745	1	0	1.88805	49.7083	1	0	>sp|Q09666|AHNK_HUMAN Neuroblast differentiation-associated protein AHNAK OS=Homo sapiens GN=AHNAK PE=1 SV=2
0	0	0	0	0	0	NaN	NaN	0	0	0	0	1	0	>sp|Q0PNE2|ELP6_HUMAN Elongator complex protein 6 OS=Homo sapiens GN=ELP6 PE=1 SV=1
0	0	0	0	0	0	NaN	NaN	0	0	0	0	2	0.00232558	>sp|Q0VAA5|PLCX2_HUMAN PI-PLC X domain-containing protein 2 OS=Homo sapiens GN=PLCXD2 PE=2 SV=1
1.32193	0	0	1.77259	0	0	0.848455	0.964759	1	1	-0.15022	3.91667	1	0	>sp|Q10469|MGAT2_HUMAN Alpha-1,6-mannosyl-glycoprotein 2-beta-N-acetylglucosaminyltransferase OS=Homo sapiens GN=MGAT2 PE=1 SV=1
0	2.34577	0.5025	2.02975	0	1.27302	0.00884382	0.686745	1	3	-1.71535	9	1	0	>sp|Q10471|GALT2_HUMAN Polypeptide N-acetylgalactosaminyltransferase 2 OS=Homo sapiens GN=GALNT2 PE=1 SV=1
1.11548	0	0	0.736966	0	1.27302	0.599671	0.874881	1	2	-0.298169	3.25	1	0	>sp|Q10472|GALT1_HUMAN Polypeptide N-acetylgalactosaminyltransferase 1 OS=Homo sapiens GN=GALNT1 PE=1 SV=1
0	0	0	0	2.32193	0	0.373901	0.686745	1	0	0.773976	4	1	0	>sp|Q10567|AP1B1_HUMAN AP-1 complex subunit beta-1 OS=Homo sapiens GN=AP1B1 PE=1 SV=2
0.321928	1.90689	2.05889	1.8413	0	0	0.637061	0.882259	2	2	-0.45579	8.75	1	0	>sp|Q10570|CPSF1_HUMAN Cleavage and polyadenylation specificity factor subunit 1 OS=Homo sapiens GN=CPSF1 PE=1 SV=2
0	0	0	0	0	0	NaN	NaN	0	0	0	0	1	0	>sp|Q10713|MPPA_HUMAN Mitochondrial-processing peptidase subunit alpha OS=Homo sapiens GN=PMPCA PE=1 SV=2
3.72792	0	0	0	0	1.77259	0.660419	0.901353	1	1	0.651777	14.6667	1	0	>sp|Q12769|NU160_HUMAN Nuclear pore complex protein Nup160 OS=Homo sapiens GN=NUP160 PE=1 SV=3
0.874469	0	0	2.34577	1.05889	0	0.878991	0.971961	2	1	-0.137471	6	1	0	>sp|Q12788|TBL3_HUMAN Transducin beta-like protein 3 OS=Homo sapiens GN=TBL3 PE=1 SV=2
0	0	1.11548	2.73697	0.415037	0	0.699323	0.923323	2	1	-0.40215	7.16667	2	0	>sp|Q12824|SNF5_HUMAN SWI/SNF-related matrix-associated actin-dependent regulator of chromatin subfamily B member 1 OS=Homo sapiens GN=SMARCB1 PE=1 SV=2
1.77259	1.27302	0.5025	0	1.05889	1.77259	0.888414	0.972756	3	2	0.0961252	7.75	3	0	>sp|Q12840|KIF5A_HUMAN Kinesin heavy chain isoform 5A OS=Homo sapiens GN=KIF5A PE=1 SV=2
0	1.27302	0	2.73697	2.52356	1.77259	0.314185	0.686745	1	3	-1.08634	14.25	2	0	>sp|Q12851|M4K2_HUMAN Mitogen-activated protein kinase kinase kinase kinase 2 OS=Homo sapiens GN=MAP4K2 PE=1 SV=2
3.01495	2.34577	0	0	0	0	0.869451	0.969525	1	1	0.223059	11.1667	1	0.00181488	>sp|Q12873|CHD3_HUMAN Chromodomain-helicase-DNA-binding protein 3 OS=Homo sapiens GN=CHD3 PE=1 SV=3
0	0	0	2.34577	0	0	0.373901	0.686745	0	1	-0.781925	4.08333	1	0	>sp|Q12874|SF3A3_HUMAN Splicing factor 3A subunit 3 OS=Homo sapiens GN=SF3A3 PE=1 SV=1
0	0	0.874469	0	0	2.56478	0.566577	0.858185	1	1	-0.563439	5.75	1	0	>sp|Q12904|AIMP1_HUMAN Aminoacyl tRNA synthase complex-interacting multifunctional protein 1 OS=Homo sapiens GN=AIMP1 PE=1 SV=2
3.35755	0	3.51307	3.59495	2.34577	1.45943	0.278062	0.686745	3	2	1.38734	36.5833	2	0	>sp|Q12905|ILF2_HUMAN Interleukin enhancer-binding factor 2 OS=Homo sapiens GN=ILF2 PE=1 SV=2
0	0	0	0	2.32193	0	0.373901	0.686745	1	0	0.773976	4	1	0	>sp|Q12906|ILF3_HUMAN Interleukin enhancer-binding factor 3 OS=Homo sapiens GN=ILF3 PE=1 SV=3
0	0.584963	0	0	1.62449	2.34577	0.649908	0.893135	1	2	-0.435415	6.66667	1	0	>sp|Q12907|LMAN2_HUMAN Vesicular integral-membrane protein VIP36 OS=Homo sapiens GN=LMAN2 PE=1 SV=1
3.56478	3.29768	0	1.9386	2.92283	1.87447	0.870039	0.969525	2	3	-0.207711	31.75	1	0	>sp|Q12912|LRMP_HUMAN Lymphoid-restricted membrane protein OS=Homo sapiens GN=LRMP PE=1 SV=3
0	0.736966	0	0	0	0.662965	0.117227	0.686745	0	2	-0.466644	1.25	3	0.00119332	>sp|Q12926|ELAV2_HUMAN ELAV-like protein 2 OS=Homo sapiens GN=ELAVL2 PE=1 SV=2
0	0	0.938599	0	3.6677	1.87447	0.511463	0.823127	2	1	0.910611	15.2917	1	0	>sp|Q12931|TRAP1_HUMAN Heat shock protein 75 kDa, mitochondrial OS=Homo sapiens GN=TRAP1 PE=1 SV=3
0	0	0	0	0	0.662965	0.373901	0.686745	0	1	-0.220988	0.583333	1	0	>sp|Q12962|TAF10_HUMAN Transcription initiation factor TFIID subunit 10 OS=Homo sapiens GN=TAF10 PE=1 SV=1
2.34577	1.27302	1.11548	2.34577	0.415037	0	0.927166	0.972756	3	2	0.0858321	11.0833	2	0	>sp|Q12979|ABR_HUMAN Active breakpoint cluster region-related protein OS=Homo sapiens GN=ABR PE=2 SV=2
0.321928	0.736966	0	0	0	0	0.633015	0.878706	1	1	-0.138346	0.916667	2	0	>sp|Q12980|NPRL3_HUMAN Nitrogen permease regulator 3-like protein OS=Homo sapiens GN=NPRL3 PE=1 SV=1
1.77259	0	2.70044	0	0	1.77259	0.4139	0.734201	2	1	0.900147	10.3333	1	0	>sp|Q12981|SEC20_HUMAN Vesicle transport protein SEC20 OS=Homo sapiens GN=BNIP1 PE=1 SV=3
0	0	0	0	1.05889	0	0.373901	0.686745	1	0	0.352965	1.08333	1	0	>sp|Q12996|CSTF3_HUMAN Cleavage stimulation factor subunit 3 OS=Homo sapiens GN=CSTF3 PE=1 SV=1
0.321928	0	1.11548	0	1.05889	0	0.0312169	0.686745	3	0	0.8321	2.5	1	0	>sp|Q13011|ECH1_HUMAN Delta(3,5)-Delta(2,4)-dienoyl-CoA isomerase, mitochondrial OS=Homo sapiens GN=ECH1 PE=1 SV=2
0	0	0	0	0	0	NaN	NaN	0	0	0	0	1	0.00215054	>sp|Q13033|STRN3_HUMAN Striatin-3 OS=Homo sapiens GN=STRN3 PE=1 SV=3
0	1.27302	0	0	0	0	0.373901	0.686745	0	1	-0.424339	1.41667	1	0	>sp|Q13042|CDC16_HUMAN Cell division cycle protein 16 homolog OS=Homo sapiens GN=CDC16 PE=1 SV=2
0	0	0	1.05889	0.736966	1.27302	0.315692	0.686745	1	2	-0.531649	3.16667	1	0	>sp|Q13043|STK4_HUMAN Serine/threonine-protein kinase 4 OS=Homo sapiens GN=STK4 PE=1 SV=2
2.66297	0	0	1.36923	0	0	0.687972	0.915646	1	1	0.431244	6.91667	1	0	>sp|Q13045|FLII_HUMAN Protein flightless-1 homolog OS=Homo sapiens GN=FLII PE=1 SV=2
0	0	1.22239	0	1.62449	0	0.123991	0.686745	2	0	0.948961	3.41667	1	0	>sp|Q13049|TRI32_HUMAN E3 ubiquitin-protein ligase TRIM32 OS=Homo sapiens GN=TRIM32 PE=1 SV=2
0	0	0	0	0	1.77259	0.373901	0.686745	0	1	-0.590863	2.41667	1	0	>sp|Q13057|COASY_HUMAN Bifunctional coenzyme A synthase OS=Homo sapiens GN=COASY PE=1 SV=4
0	0	0	0	0	0.662965	0.373901	0.686745	0	1	-0.220988	0.583333	2	0.00469484	>sp|Q13084|RM28_HUMAN 39S ribosomal protein L28, mitochondrial OS=Homo sapiens GN=MRPL28 PE=1 SV=4
0	0	0	0	0	0	NaN	NaN	0	0	0	0	1	0	>sp|Q13085|ACACA_HUMAN Acetyl-CoA carboxylase 1 OS=Homo sapiens GN=ACACA PE=1 SV=2
0	0	0	0	0	0	NaN	NaN	0	0	0	0	1	0	>sp|Q13087|PDIA2_HUMAN Protein disulfide-isomerase A2 OS=Homo sapiens GN=PDIA2 PE=1 SV=2
2.54432	0	2.36923	0	2.52356	0	1.47311e-06	0.00309973	3	0	2.47904	13.75	2	0	>sp|Q13098|CSN1_HUMAN COP9 signalosome complex subunit 1 OS=Homo sapiens GN=GPS1 PE=1 SV=4
2.34577	0.736966	0	0	0	0	0.548629	0.853691	1	1	0.53627	4.75	1	0	>sp|Q13107|UBP4_HUMAN Ubiquitin carboxyl-terminal hydrolase 4 OS=Homo sapiens GN=USP4 PE=1 SV=3
0	0.584963	0	1.27302	0.415037	0.662965	0.0528203	0.686745	1	3	-0.70197	2.83333	1	0	>sp|Q13112|CAF1B_HUMAN Chromatin assembly factor 1 subunit B OS=Homo sapiens GN=CHAF1B PE=1 SV=1
0.321928	0	0	0	0	0	0.373901	0.686745	1	0	0.107309	0.25	1	0	>sp|Q13123|RED_HUMAN Protein Red OS=Homo sapiens GN=IK PE=1 SV=3
0	0	0	0	0	0	NaN	NaN	0	0	0	0	2	0	>sp|Q13126|MTAP_HUMAN S-methyl-5'-thioadenosine phosphorylase OS=Homo sapiens GN=MTAP PE=1 SV=2
0	0	0	0	0	1.27302	0.373901	0.686745	0	1	-0.424339	1.41667	1	0	>sp|Q13131|AAPK1_HUMAN 5'-AMP-activated protein kinase catalytic subunit alpha-1 OS=Homo sapiens GN=PRKAA1 PE=1 SV=4
0	0	0	0	0	0	NaN	NaN	0	0	0	0	2	0	>sp|Q13144|EI2BE_HUMAN Translation initiation factor eIF-2B subunit epsilon OS=Homo sapiens GN=EIF2B5 PE=1 SV=3
2.56478	1.73697	0	0.807355	0	2.02975	0.511667	0.823127	1	3	-0.669761	11.0833	1	0	>sp|Q13148|TADBP_HUMAN TAR DNA-binding protein 43 OS=Homo sapiens GN=TARDBP PE=1 SV=1
0	0	0	0	0	0.5025	0.373901	0.686745	0	1	-0.1675	0.416667	1	0	>sp|Q13151|ROA0_HUMAN Heterogeneous nuclear ribonucleoprotein A0 OS=Homo sapiens GN=HNRNPA0 PE=1 SV=1
2.43741	0	0	0	0	0	0.373901	0.686745	1	0	0.812468	4.41667	1	0	>sp|Q13155|AIMP2_HUMAN Aminoacyl tRNA synthase complex-interacting multifunctional protein 2 OS=Homo sapiens GN=AIMP2 PE=1 SV=2
0	0	0	0	2	0.874469	0.633301	0.878787	1	1	0.375177	3.83333	2	0	>sp|Q13162|PRDX4_HUMAN Peroxiredoxin-4 OS=Homo sapiens GN=PRDX4 PE=1 SV=1
0	0	0	0	0	0	NaN	NaN	0	0	0	0	2	0.00865801	>sp|Q13163|MP2K5_HUMAN Dual specificity mitogen-activated protein kinase kinase 5 OS=Homo sapiens GN=MAP2K5 PE=1 SV=2
0	0	0	0	0	0	NaN	NaN	0	0	0	0	1	0	>sp|Q13177|PAK2_HUMAN Serine/threonine-protein kinase PAK 2 OS=Homo sapiens GN=PAK2 PE=1 SV=3
0	0	1.77259	1	0	0.5025	0.897721	0.972756	1	2	0.0900297	3.83333	1	0	>sp|Q13188|STK3_HUMAN Serine/threonine-protein kinase 3 OS=Homo sapiens GN=STK3 PE=1 SV=2
4.90489	4.62693	2.68182	5.04439	5.75711	4.75043	0.717481	0.929125	3	3	-0.359309	169.083	1	0	>sp|Q13200|PSMD2_HUMAN 26S proteasome non-ATPase regulatory subunit 2 OS=Homo sapiens GN=PSMD2 PE=1 SV=3
1.77259	2.05889	2.05889	3.11548	1.62449	1.27302	0.579528	0.86614	3	3	-0.330472	19.9167	2	0	>sp|Q13227|GPS2_HUMAN G protein pathway suppressor 2 OS=Homo sapiens GN=GPS2 PE=1 SV=3
0.874469	0	0.5025	1.27302	0	0	0.947471	0.979423	2	1	0.0346503	2.66667	1	0.00126502	>sp|Q13228|SBP1_HUMAN Selenium-binding protein 1 OS=Homo sapiens GN=SELENBP1 PE=1 SV=2
0.321928	0	0	0	1.05889	0	0.215858	0.686745	2	0	0.460274	1.33333	1	0	>sp|Q13242|SRSF9_HUMAN Serine/arginine-rich splicing factor 9 OS=Homo sapiens GN=SRSF9 PE=1 SV=1
0	0	0	0	0	0	NaN	NaN	0	0	0	0	1	0	>sp|Q13247|SRSF6_HUMAN Serine/arginine-rich splicing factor 6 OS=Homo sapiens GN=SRSF6 PE=1 SV=2
0	0	0	0	0	1.27302	0.373901	0.686745	0	1	-0.424339	1.41667	1	0.00828729	>sp|Q13257|MD2L1_HUMAN Mitotic spindle assembly checkpoint protein MAD2A OS=Homo sapiens GN=MAD2L1 PE=1 SV=1
6.02422	5.28232	6.18157	5.2127	3.04439	2.24793	0.59001	0.874172	3	3	0.835745	220.667	1	0	>sp|Q13263|TIF1B_HUMAN Transcription intermediary factor 1-beta OS=Homo sapiens GN=TRIM28 PE=1 SV=5
0	0.584963	0	1	0	0	0.142643	0.686745	0	2	-0.528321	1.5	1	0	>sp|Q13283|G3BP1_HUMAN Ras GTPase-activating protein-binding protein 1 OS=Homo sapiens GN=G3BP1 PE=1 SV=1
0	0	0	0	0	0.5025	0.373901	0.686745	0	1	-0.1675	0.416667	1	0	>sp|Q13303|KCAB2_HUMAN Voltage-gated potassium channel subunit beta-2 OS=Homo sapiens GN=KCNAB2 PE=1 SV=2
0.874469	0	0.5025	0	0	0	0.144293	0.686745	2	0	0.45899	1.25	2	0	>sp|Q13309|SKP2_HUMAN S-phase kinase-associated protein 2 OS=Homo sapiens GN=SKP2 PE=1 SV=2
0	0	0	0.115477	0	0	0.373901	0.686745	0	1	-0.0384924	0.0833333	1	0	>sp|Q13310|PABP4_HUMAN Polyadenylate-binding protein 4 OS=Homo sapiens GN=PABPC4 PE=1 SV=1
3	2.45943	0.115477	2.80735	2.92283	2.02975	0.689297	0.916826	3	3	-0.419408	27.25	2	0	>sp|Q13330|MTA1_HUMAN Metastasis-associated protein MTA1 OS=Homo sapiens GN=MTA1 PE=1 SV=2
2.39232	0	0.662965	0.662965	0	0	0.345631	0.686745	2	1	0.797439	5.41667	1	0	>sp|Q13347|EIF3I_HUMAN Eukaryotic translation initiation factor 3 subunit I OS=Homo sapiens GN=EIF3I PE=1 SV=1
0	0	0.5025	0	0	0	0.373901	0.686745	1	0	0.1675	0.416667	2	0	>sp|Q13362|2A5G_HUMAN Serine/threonine-protein phosphatase 2A 56 kDa regulatory subunit gamma isoform OS=Homo sapiens GN=PPP2R5C PE=1 SV=3
2.08746	1.70044	3.62449	2.29768	1.73697	1.58496	0.372768	0.686745	3	3	0.621946	25.0833	1	0	>sp|Q13363|CTBP1_HUMAN C-terminal-binding protein 1 OS=Homo sapiens GN=CTBP1 PE=1 SV=2
0	0.736966	0	0	0	0	0.373901	0.686745	0	1	-0.245655	0.666667	1	0.00813008	>sp|Q13370|PDE3B_HUMAN cGMP-inhibited 3',5'-cyclic phosphodiesterase B OS=Homo sapiens GN=PDE3B PE=1 SV=2
0	0	0	0	0	0	NaN	NaN	0	0	0	0	1	0	>sp|Q13371|PHLP_HUMAN Phosducin-like protein OS=Homo sapiens GN=PDCL PE=1 SV=3
0	2.05889	0	0	0	0	0.373901	0.686745	0	1	-0.686298	3.16667	1	0.00189215	>sp|Q13395|TARB1_HUMAN Probable methyltransferase TARBP1 OS=Homo sapiens GN=TARBP1 PE=1 SV=1
0.321928	0	0.5025	0.736966	0.415037	0.662965	0.834576	0.961096	3	2	-0.0534882	2.25	3	0	>sp|Q13401|PM2P3_HUMAN Putative postmeiotic segregation increased 2-like protein 3 OS=Homo sapiens GN=PMS2P3 PE=5 SV=2
0	0	0	0	0	0	NaN	NaN	0	0	0	0	1	0	>sp|Q13409|DC1I2_HUMAN Cytoplasmic dynein 1 intermediate chain 2 OS=Homo sapiens GN=DYNC1I2 PE=1 SV=3
0	0	0	1.27302	0	0	0.373901	0.686745	0	1	-0.424339	1.41667	1	0.003125	>sp|Q13416|ORC2_HUMAN Origin recognition complex subunit 2 OS=Homo sapiens GN=ORC2 PE=1 SV=2
0	2.05889	0	0	0.415037	0	0.477561	0.797147	1	1	-0.547952	3.5	2	0	>sp|Q13418|ILK_HUMAN Integrin-linked protein kinase OS=Homo sapiens GN=ILK PE=1 SV=2
0	1.27302	0	0.736966	1.05889	0.662965	0.251697	0.686745	1	3	-0.538018	3.75	1	0	>sp|Q13422|IKZF1_HUMAN DNA-binding protein Ikaros OS=Homo sapiens GN=IKZF1 PE=1 SV=1
0	0	0	1.77259	3.08746	0	0.7306	0.934301	1	1	0.438291	9.91667	1	0	>sp|Q13423|NNTM_HUMAN NAD(P) transhydrogenase, mitochondrial OS=Homo sapiens GN=NNT PE=1 SV=3
0	0	0	0	1.62449	0	0.373901	0.686745	1	0	0.541497	2.08333	1	0	>sp|Q13425|SNTB2_HUMAN Beta-2-syntrophin OS=Homo sapiens GN=SNTB2 PE=1 SV=1
0	0	0	1	0	0	0.373901	0.686745	0	1	-0.333333	1	2	0	>sp|Q13435|SF3B2_HUMAN Splicing factor 3B subunit 2 OS=Homo sapiens GN=SF3B2 PE=1 SV=2
0	0	0	0	1.62449	0	0.373901	0.686745	1	0	0.541497	2.08333	1	0	>sp|Q13438|OS9_HUMAN Protein OS-9 OS=Homo sapiens GN=OS9 PE=1 SV=1
0	0	0	0	0	0	NaN	NaN	0	0	0	0	1	0.00795229	>sp|Q13442|HAP28_HUMAN 28 kDa heat- and acid-stable phosphoprotein OS=Homo sapiens GN=PDAP1 PE=1 SV=1
0.874469	0	2.05889	2.02975	0	0	0.755217	0.940709	2	1	0.301205	7.08333	1	0	>sp|Q13451|FKBP5_HUMAN Peptidyl-prolyl cis-trans isomerase FKBP5 OS=Homo sapiens GN=FKBP5 PE=1 SV=2
0	1.73697	1.11548	2.02975	0.415037	1.27302	0.0408977	0.686745	2	3	-1.16974	8.33333	2	0	>sp|Q13485|SMAD4_HUMAN Mothers against decapentaplegic homolog 4 OS=Homo sapiens GN=SMAD4 PE=1 SV=1
1.8413	3.06609	1.77259	2.48113	2	0.5025	0.86106	0.967523	3	3	-0.145275	20.375	1	0	>sp|Q13492|PICAL_HUMAN Phosphatidylinositol-binding clathrin assembly protein OS=Homo sapiens GN=PICALM PE=1 SV=2
0	0	0.5025	1.27302	0	0	0.603498	0.874881	1	1	-0.256839	1.83333	1	0	>sp|Q13501|SQSTM_HUMAN Sequestosome-1 OS=Homo sapiens GN=SQSTM1 PE=1 SV=1
1.87447	0	0.662965	0	2.32193	2.34577	0.416605	0.737276	3	1	0.837862	11.3333	2	0	>sp|Q13505|MTX1_HUMAN Metaxin-1 OS=Homo sapiens GN=MTX1 PE=1 SV=2
0	0.736966	0	0	0	0	0.373901	0.686745	0	1	-0.245655	0.666667	3	0	>sp|Q13506|NAB1_HUMAN NGFI-A-binding protein 1 OS=Homo sapiens GN=NAB1 PE=1 SV=2
0	5.39803	4.49452	0	3.74595	0	0.698303	0.923323	2	1	0.947482	75.125	2	0	>sp|Q13509|TBB3_HUMAN Tubulin beta-3 chain OS=Homo sapiens GN=TUBB3 PE=1 SV=2
0	0	1.11548	0	0	0	0.373901	0.686745	1	0	0.371826	1.16667	2	0	>sp|Q13510|ASAH1_HUMAN Acid ceramidase OS=Homo sapiens GN=ASAH1 PE=1 SV=5
0	0	0	0	0	0	NaN	NaN	0	0	0	0	1	0.00515464	>sp|Q13523|PRP4B_HUMAN Serine/threonine-protein kinase PRP4 homolog OS=Homo sapiens GN=PRPF4B PE=1 SV=3
0.874469	1.27302	0	0.736966	0	0	0.465996	0.783726	1	2	-0.378505	2.91667	1	0	>sp|Q13546|RIPK1_HUMAN Receptor-interacting serine/threonine-protein kinase 1 OS=Homo sapiens GN=RIPK1 PE=1 SV=3
0	0	2.52356	2.34577	0.415037	1.77259	0.727763	0.932505	2	2	-0.393255	11.5833	1	0	>sp|Q13547|HDAC1_HUMAN Histone deacetylase 1 OS=Homo sapiens GN=HDAC1 PE=1 SV=1
0	1.27302	0.5025	0	0	1.27302	0.20969	0.686745	1	2	-0.681179	3.25	4	0	>sp|Q13554|KCC2B_HUMAN Calcium/calmodulin-dependent protein kinase type II subunit beta OS=Homo sapiens GN=CAMK2B PE=1 SV=3
0	0	0	0	0	2.02975	0.373901	0.686745	0	1	-0.676582	3.08333	2	0	>sp|Q13557|KCC2D_HUMAN Calcium/calmodulin-dependent protein kinase type II subunit delta OS=Homo sapiens GN=CAMK2D PE=1 SV=3
0	0	0	0	0.415037	0	0.373901	0.686745	1	0	0.138346	0.333333	1	0	>sp|Q13561|DCTN2_HUMAN Dynactin subunit 2 OS=Homo sapiens GN=DCTN2 PE=1 SV=4
0	0	0	0	0	0	NaN	NaN	0	0	0	0	1	0	>sp|Q13564|ULA1_HUMAN NEDD8-activating enzyme E1 regulatory subunit OS=Homo sapiens GN=NAE1 PE=1 SV=1
1.45943	1.5025	1.73697	3.11548	0	0	0.674743	0.908346	2	2	-0.47386	13.5833	2	0	>sp|Q13573|SNW1_HUMAN SNW domain-containing protein 1 OS=Homo sapiens GN=SNW1 PE=1 SV=1
0.874469	0	0	0	1.05889	0	0.119723	0.686745	2	0	0.644454	1.91667	1	0	>sp|Q13596|SNX1_HUMAN Sorting nexin-1 OS=Homo sapiens GN=SNX1 PE=1 SV=3
0	0	1.11548	1.27302	0	0	0.930318	0.972756	1	1	-0.0525138	2.58333	1	0.00488998	>sp|Q13608|PEX6_HUMAN Peroxisome assembly factor 2 OS=Homo sapiens GN=PEX6 PE=1 SV=2
2.41504	0	1.54432	3.39232	3.08746	2.24793	0.689764	0.917276	3	2	0.468859	27	1	0	>sp|Q13616|CUL1_HUMAN Cullin-1 OS=Homo sapiens GN=CUL1 PE=1 SV=2
1.77259	0.584963	0	2.34577	2	2.02975	0.659227	0.900627	2	3	-0.395965	13.0833	2	0	>sp|Q13617|CUL2_HUMAN Cullin-2 OS=Homo sapiens GN=CUL2 PE=1 SV=2
2.54432	1.27302	2.70044	2.34577	3.56478	2.9542	0.271531	0.686745	3	3	0.745518	33.4167	1	0	>sp|Q13618|CUL3_HUMAN Cullin-3 OS=Homo sapiens GN=CUL3 PE=1 SV=2
1.79008	1.11548	3.14296	2.85798	2.96963	1.96963	0.377418	0.688898	3	3	0.653192	27.4583	2	0	>sp|Q13619|CUL4A_HUMAN Cullin-4A OS=Homo sapiens GN=CUL4A PE=1 SV=3
2.11548	0.938599	2.05889	2.73697	2.52356	1.77259	0.483339	0.803224	3	3	0.416593	20.25	2	0	>sp|Q13620|CUL4B_HUMAN Cullin-4B OS=Homo sapiens GN=CUL4B PE=1 SV=4
2.34577	2.05889	2.70044	0	0	0	0.412766	0.73369	2	1	0.995774	12.75	1	0	>sp|Q13625|ASPP2_HUMAN Apoptosis-stimulating of p53 protein 2 OS=Homo sapiens GN=TP53BP2 PE=1 SV=2
0	0	0	0	0	0	NaN	NaN	0	0	0	0	1	0.00789474	>sp|Q13636|RAB31_HUMAN Ras-related protein Rab-31 OS=Homo sapiens GN=RAB31 PE=1 SV=1
0	0.736966	0	1.27302	0	0	0.143601	0.686745	0	2	-0.669995	2.08333	2	0	>sp|Q13642|FHL1_HUMAN Four and a half LIM domains protein 1 OS=Homo sapiens GN=FHL1 PE=1 SV=4
0	0	1.11548	1.77259	1.62449	1.27302	0.893309	0.972756	2	2	-0.10188	7.08333	1	0	>sp|Q13670|PM2PB_HUMAN Putative postmeiotic segregation increased 2-like protein 11 OS=Homo sapiens GN=PMS2P11 PE=5 SV=1
1.77259	0	1.11548	1.27302	1.05889	0	0.138248	0.686745	3	1	0.891314	6.08333	1	0	>sp|Q13724|MOGS_HUMAN Mannosyl-oligosaccharide glucosidase OS=Homo sapiens GN=MOGS PE=1 SV=5
0	0	0	2.34577	2.32193	0	0.994581	0.999044	1	1	-0.00794891	8.08333	3	0	>sp|Q13733|AT1A4_HUMAN Sodium/potassium-transporting ATPase subunit alpha-4 OS=Homo sapiens GN=ATP1A4 PE=1 SV=3
0	0	0	0	5.06429	5.43185	0.9629	0.986145	1	1	-0.122517	74.625	2	0	>sp|Q13748|TBA3C_HUMAN Tubulin alpha-3C/D chain OS=Homo sapiens GN=TUBA3C PE=1 SV=3
0	3.29768	2.14296	3.40372	2.41504	1.66297	0.252221	0.686745	2	3	-1.26879	28.3333	2	0	>sp|Q13765|NACA_HUMAN Nascent polypeptide-associated complex subunit alpha OS=Homo sapiens GN=NACA PE=1 SV=1
1.32193	0	0	0.736966	0	0	0.718804	0.929125	1	1	0.194988	2.16667	2	0.00168634	>sp|Q13769|THOC5_HUMAN THO complex subunit 5 homolog OS=Homo sapiens GN=THOC5 PE=1 SV=2
0	0	0	1.5025	0	0	0.373901	0.686745	0	1	-0.500833	1.83333	1	0	>sp|Q13813|SPTN1_HUMAN Spectrin alpha chain, non-erythrocytic 1 OS=Homo sapiens GN=SPTAN1 PE=1 SV=3
0	1.27302	1.11548	0	0	0	0.930318	0.972756	1	1	-0.0525138	2.58333	3	0	>sp|Q13829|BACD2_HUMAN BTB/POZ domain-containing adapter for CUL3-mediated RhoA degradation protein 2 OS=Homo sapiens GN=TNFAIP1 PE=1 SV=1
0	0	0	1.27302	1.05889	0.662965	0.596891	0.874881	1	2	-0.292363	3.08333	2	0	>sp|Q13835|PKP1_HUMAN Plakophilin-1 OS=Homo sapiens GN=PKP1 PE=1 SV=2
0	0	0	1.45943	0.222392	0	0.449212	0.772374	1	1	-0.412346	1.91667	2	0	>sp|Q13838|DX39B_HUMAN Spliceosome RNA helicase DDX39B OS=Homo sapiens GN=DDX39B PE=1 SV=1
0	0	0	0	1.05889	0	0.373901	0.686745	1	0	0.352965	1.08333	2	0	>sp|Q13867|BLMH_HUMAN Bleomycin hydrolase OS=Homo sapiens GN=BLMH PE=1 SV=1
0	0	0	0	0.415037	0	0.373901	0.686745	1	0	0.138346	0.333333	1	0	>sp|Q13868|EXOS2_HUMAN Exosome complex component RRP4 OS=Homo sapiens GN=EXOSC2 PE=1 SV=2
4.36923	0	4.36923	0	0	0	0.116117	0.686745	2	0	2.91282	39.3333	1	0	>sp|Q13885|TBB2A_HUMAN Tubulin beta-2A chain OS=Homo sapiens GN=TUBB2A PE=1 SV=1
0	0	0	0	0	0	NaN	NaN	0	0	0	0	2	0	>sp|Q13888|TF2H2_HUMAN General transcription factor IIH subunit 2 OS=Homo sapiens GN=GTF2H2 PE=1 SV=1
0.874469	0	0	0	0	0	0.373901	0.686745	1	0	0.29149	0.833333	2	0	>sp|Q13889|TF2H3_HUMAN General transcription factor IIH subunit 3 OS=Homo sapiens GN=GTF2H3 PE=1 SV=2
0	1.77259	1.11548	0	0	0	0.76939	0.940709	1	1	-0.219037	3.58333	1	0	>sp|Q13895|BYST_HUMAN Bystin OS=Homo sapiens GN=BYSL PE=1 SV=3
0.321928	0	1.73697	0	1.05889	2.56478	0.855236	0.964759	3	1	0.184334	8.58333	1	0	>sp|Q13907|IDI1_HUMAN Isopentenyl-diphosphate Delta-isomerase 1 OS=Homo sapiens GN=IDI1 PE=1 SV=2
3.40372	3.78136	2.58496	3.90689	2.73697	2.02975	0.64059	0.88633	3	3	-0.330782	50.0833	1	0	>sp|Q13948|CASP_HUMAN Protein CASP OS=Homo sapiens GN=CUX1 PE=1 SV=2
0	0	0	0	1.05889	0	0.373901	0.686745	1	0	0.352965	1.08333	1	0	>sp|Q13951|PEBB_HUMAN Core-binding factor subunit beta OS=Homo sapiens GN=CBFB PE=1 SV=2
0	0.662965	2.22239	0	0	0	0.538168	0.848377	1	1	0.519809	4.25	1	0	>sp|Q13952|NFYC_HUMAN Nuclear transcription factor Y subunit gamma OS=Homo sapiens GN=NFYC PE=1 SV=3
1.77259	0	0	0	0	0	0.373901	0.686745	1	0	0.590863	2.41667	1	0	>sp|Q14004|CDK13_HUMAN Cyclin-dependent kinase 13 OS=Homo sapiens GN=CDK13 PE=1 SV=2
0	0	0	0.736966	0	0.662965	0.117227	0.686745	0	2	-0.466644	1.25	2	0.00453858	>sp|Q14005|IL16_HUMAN Pro-interleukin-16 OS=Homo sapiens GN=IL16 PE=1 SV=4
0	1.77259	0	0	0	0	0.373901	0.686745	0	1	-0.590863	2.41667	1	0.00190476	>sp|Q14008|CKAP5_HUMAN Cytoskeleton-associated protein 5 OS=Homo sapiens GN=CKAP5 PE=1 SV=3
0.321928	0	0	0	0	0	0.373901	0.686745	1	0	0.107309	0.25	2	0.00665336	>sp|Q14012|KCC1A_HUMAN Calcium/calmodulin-dependent protein kinase type 1 OS=Homo sapiens GN=CAMK1 PE=1 SV=1
0.874469	0	1.11548	0	0	1.27302	0.682624	0.910933	2	1	0.238976	3.41667	1	0	>sp|Q14088|RB33A_HUMAN Ras-related protein Rab-33A OS=Homo sapiens GN=RAB33A PE=1 SV=2
0	0	0.662965	0	0	0	0.373901	0.686745	1	0	0.220988	0.583333	2	0	>sp|Q14103|HNRPD_HUMAN Heterogeneous nuclear ribonucleoprotein D0 OS=Homo sapiens GN=HNRNPD PE=1 SV=1
0	0	1.73697	0	0	0	0.373901	0.686745	1	0	0.578989	2.33333	1	0	>sp|Q14106|TOB2_HUMAN Protein Tob2 OS=Homo sapiens GN=TOB2 PE=1 SV=2
0	0	0	0	0	0.662965	0.373901	0.686745	0	1	-0.220988	0.583333	1	0	>sp|Q14137|BOP1_HUMAN Ribosome biogenesis protein BOP1 OS=Homo sapiens GN=BOP1 PE=1 SV=2
0	1.77259	0	0	0	0	0.373901	0.686745	0	1	-0.590863	2.41667	1	0	>sp|Q14139|UBE4A_HUMAN Ubiquitin conjugation factor E4 A OS=Homo sapiens GN=UBE4A PE=1 SV=2
0.321928	0	0	0	0	0	0.373901	0.686745	1	0	0.107309	0.25	1	0.00677507	>sp|Q14140|SRTD2_HUMAN SERTA domain-containing protein 2 OS=Homo sapiens GN=SERTAD2 PE=1 SV=1
1.77259	0	0	0	1.62449	0	0.116872	0.686745	2	0	1.13236	4.5	2	0	>sp|Q14141|SEPT6_HUMAN Septin-6 OS=Homo sapiens GN=SEPT6 PE=1 SV=4
0.321928	0	0	0	0	2.34577	0.440862	0.763759	1	1	-0.674616	4.33333	1	0	>sp|Q14145|KEAP1_HUMAN Kelch-like ECH-associated protein 1 OS=Homo sapiens GN=KEAP1 PE=1 SV=2
2.02975	0	1.73697	1.77259	0	0	0.485664	0.805484	2	1	0.664708	7.83333	1	0.00212089	>sp|Q14146|URB2_HUMAN Unhealthy ribosome biogenesis protein 2 homolog OS=Homo sapiens GN=URB2 PE=2 SV=2
5.07146	5.53398	5.95226	5.57112	3.36923	0	0.612874	0.878706	3	2	1.09595	194.75	1	0	>sp|Q14152|EIF3A_HUMAN Eukaryotic translation initiation factor 3 subunit A OS=Homo sapiens GN=EIF3A PE=1 SV=1
0	0	0	0	0	0	NaN	NaN	0	0	0	0	2	0	>sp|Q14155|ARHG7_HUMAN Rho guanine nucleotide exchange factor 7 OS=Homo sapiens GN=ARHGEF7 PE=1 SV=2
1.77259	0	0	1.27302	0.415037	0	0.678459	0.910508	2	1	0.30487	4.16667	1	0	>sp|Q14156|EFR3A_HUMAN Protein EFR3 homolog A OS=Homo sapiens GN=EFR3A PE=1 SV=2
2.02975	2.58496	2.70044	1.58496	1.9386	3.56478	0.597246	0.874881	3	3	-0.355308	29.25	1	0	>sp|Q14157|UBP2L_HUMAN Ubiquitin-associated protein 2-like OS=Homo sapiens GN=UBAP2L PE=1 SV=2
0	0	0	0	2.92283	0	0.373901	0.686745	1	0	0.974277	6.58333	3	0	>sp|Q14160|SCRIB_HUMAN Protein scribble homolog OS=Homo sapiens GN=SCRIB PE=1 SV=4
2.02975	0	0	0.736966	0	0	0.581641	0.867051	1	1	0.430927	3.75	2	0.00213904	>sp|Q14161|GIT2_HUMAN ARF GTPase-activating protein GIT2 OS=Homo sapiens GN=GIT2 PE=1 SV=2
0	0	0.5025	0	0	0	0.373901	0.686745	1	0	0.1675	0.416667	1	0	>sp|Q14165|MLEC_HUMAN Malectin OS=Homo sapiens GN=MLEC PE=1 SV=1
0	0	0	0	3.08746	0	0.373901	0.686745	1	0	1.02915	7.5	1	0	>sp|Q14166|TTL12_HUMAN Tubulin--tyrosine ligase-like protein 12 OS=Homo sapiens GN=TTLL12 PE=1 SV=2
0	0	0.5025	0	0	0	0.373901	0.686745	1	0	0.1675	0.416667	2	0.00245399	>sp|Q14188|TFDP2_HUMAN Transcription factor Dp-2 OS=Homo sapiens GN=TFDP2 PE=1 SV=2
0	0	0	0	0	0	NaN	NaN	0	0	0	0	3	0	>sp|Q14194|DPYL1_HUMAN Dihydropyrimidinase-related protein 1 OS=Homo sapiens GN=CRMP1 PE=1 SV=1
0	0	0	0	0	0	NaN	NaN	0	0	0	0	1	0	>sp|Q14195|DPYL3_HUMAN Dihydropyrimidinase-related protein 3 OS=Homo sapiens GN=DPYSL3 PE=1 SV=1
1.36923	3.23522	1.73697	2.73697	0	0	0.447742	0.770765	2	2	-0.955328	18	2	0	>sp|Q14203|DCTN1_HUMAN Dynactin subunit 1 OS=Homo sapiens GN=DCTN1 PE=1 SV=3
6.05347	5.18818	5.36632	5.86419	4.49719	0	0.442904	0.765508	3	2	1.62154	219.958	1	0	>sp|Q14204|DYHC1_HUMAN Cytoplasmic dynein 1 heavy chain 1 OS=Homo sapiens GN=DYNC1H1 PE=1 SV=5
0	0	1.73697	0	0.415037	2.02975	0.964294	0.986875	2	1	0.0407519	5.75	1	0	>sp|Q14232|EI2BA_HUMAN Translation initiation factor eIF-2B subunit alpha OS=Homo sapiens GN=EIF2B1 PE=1 SV=1
0	0	0	0	3.3339	3.02975	0.949411	0.980407	1	1	0.101384	16.25	2	0	>sp|Q14240|IF4A2_HUMAN Eukaryotic initiation factor 4A-II OS=Homo sapiens GN=EIF4A2 PE=1 SV=2
0	0	2.36923	2.02975	2.32193	0	0.439298	0.763208	2	1	0.887138	11.25	2	0	>sp|Q14254|FLOT2_HUMAN Flotillin-2 OS=Homo sapiens GN=FLOT2 PE=1 SV=2
0	0	0	0	0	0	NaN	NaN	0	0	0	0	2	0	>sp|Q14257|RCN2_HUMAN Reticulocalbin-2 OS=Homo sapiens GN=RCN2 PE=1 SV=1
2.77259	3.23522	0	1.58496	1.62449	0	0.914417	0.972756	2	2	-0.141033	18.3333	1	0	>sp|Q14258|TRI25_HUMAN E3 ubiquitin/ISG15 ligase TRIM25 OS=Homo sapiens GN=TRIM25 PE=1 SV=2
0.874469	0	0	2.34577	2	0	0.865062	0.969525	2	1	0.176231	7.91667	1	0	>sp|Q14289|FAK2_HUMAN Protein-tyrosine kinase 2-beta OS=Homo sapiens GN=PTK2B PE=1 SV=2
1.77259	1.27302	0	0	1.05889	2.02975	0.851108	0.964759	2	2	-0.157094	8	1	0	>sp|Q14315|FLNC_HUMAN Filamin-C OS=Homo sapiens GN=FLNC PE=1 SV=3
0	0	2.22239	1.36923	0	0	0.760177	0.940709	1	1	0.284386	5.25	1	0	>sp|Q14318|FKBP8_HUMAN Peptidyl-prolyl cis-trans isomerase FKBP8 OS=Homo sapiens GN=FKBP8 PE=1 SV=2
0	0	0	0	0	0.5025	0.373901	0.686745	0	1	-0.1675	0.416667	1	0	>sp|Q14344|GNA13_HUMAN Guanine nucleotide-binding protein subunit alpha-13 OS=Homo sapiens GN=GNA13 PE=1 SV=2
0.736966	0	0	0	0	0	0.373901	0.686745	1	0	0.245655	0.666667	2	0	>sp|Q14444|CAPR1_HUMAN Caprin-1 OS=Homo sapiens GN=CAPRIN1 PE=1 SV=2
0	0	0	0	0	0	NaN	NaN	0	0	0	0	3	0	>sp|Q14457|BECN1_HUMAN Beclin-1 OS=Homo sapiens GN=BECN1 PE=1 SV=2
0	0	2.22239	2.48113	1.05889	0	0.811453	0.947658	2	1	0.26672	9.33333	2	0	>sp|Q14498|RBM39_HUMAN RNA-binding protein 39 OS=Homo sapiens GN=RBM39 PE=1 SV=2
0	2.51307	0.321928	0	0	0	0.435914	0.75949	1	1	-0.73038	4.95833	2	0	>sp|Q14525|KT33B_HUMAN Keratin, type I cuticular Ha3-II OS=Homo sapiens GN=KRT33B PE=1 SV=3
0	1.87447	0	0	0	0	0.373901	0.686745	0	1	-0.624823	2.66667	2	0	>sp|Q14532|K1H2_HUMAN Keratin, type I cuticular Ha2 OS=Homo sapiens GN=KRT32 PE=2 SV=3
0	0.736966	0	0.736966	0	0	0.116117	0.686745	0	2	-0.49131	1.33333	4	0	>sp|Q14533|KRT81_HUMAN Keratin, type II cuticular Hb1 OS=Homo sapiens GN=KRT81 PE=1 SV=3
0.874469	0	1.11548	0.736966	0	0	0.374814	0.687161	2	1	0.41766	2.66667	1	0	>sp|Q14534|ERG1_HUMAN Squalene monooxygenase OS=Homo sapiens GN=SQLE PE=1 SV=3
0	0	0.5025	0	0.415037	0	0.119718	0.686745	2	0	0.305846	0.75	1	0	>sp|Q14558|KPRA_HUMAN Phosphoribosyl pyrophosphate synthase-associated protein 1 OS=Homo sapiens GN=PRPSAP1 PE=1 SV=2
0.938599	0	0	0	3.05889	0	0.214789	0.686745	2	0	1.3325	8.25	1	0	>sp|Q14566|MCM6_HUMAN DNA replication licensing factor MCM6 OS=Homo sapiens GN=MCM6 PE=1 SV=1
2.23522	2.04439	1.43741	0	3.12928	3.20945	0.651166	0.893792	3	2	0.516019	24.5417	1	0	>sp|Q14568|HS902_HUMAN Heat shock protein HSP 90-alpha A2 OS=Homo sapiens GN=HSP90AA2P PE=1 SV=2
0	0	0	0	0.415037	0.662965	0.767116	0.940709	1	1	-0.0826425	0.916667	3	0	>sp|Q14651|PLSI_HUMAN Plastin-1 OS=Homo sapiens GN=PLS1 PE=1 SV=2
0	0	0	0	1.05889	0	0.373901	0.686745	1	0	0.352965	1.08333	1	0.00178571	>sp|Q14657|LAGE3_HUMAN EKC/KEOPS complex subunit LAGE3 OS=Homo sapiens GN=LAGE3 PE=1 SV=2
4.15313	2.07325	0	3.91488	2.82443	3.58496	0.556318	0.853691	2	3	-0.865179	51.1667	2	0	>sp|Q14671|PUM1_HUMAN Pumilio homolog 1 OS=Homo sapiens GN=PUM1 PE=1 SV=3
3.27302	3.49185	2.70044	3.22239	2.73697	1.27302	0.755613	0.940709	3	3	0.241053	39.8333	1	0	>sp|Q14677|EPN4_HUMAN Clathrin interactor 1 OS=Homo sapiens GN=CLINT1 PE=1 SV=1
1.58496	2.83289	0	0	4.34577	4.29462	0.834492	0.961096	2	2	-0.398924	46.0833	1	0	>sp|Q14683|SMC1A_HUMAN Structural maintenance of chromosomes protein 1A OS=Homo sapiens GN=SMC1A PE=1 SV=2
0.874469	0.736966	0	0	0	0	0.910092	0.972756	1	1	0.0458345	1.5	1	0.00202634	>sp|Q14687|GSE1_HUMAN Genetic suppressor element 1 OS=Homo sapiens GN=GSE1 PE=1 SV=3
0	0	0	0	0.415037	0	0.373901	0.686745	1	0	0.138346	0.333333	1	0	>sp|Q14691|PSF1_HUMAN DNA replication complex GINS protein PSF1 OS=Homo sapiens GN=GINS1 PE=1 SV=1
0	0	0	0	0	0.662965	0.373901	0.686745	0	1	-0.220988	0.583333	2	0	>sp|Q14693|LPIN1_HUMAN Phosphatidate phosphatase LPIN1 OS=Homo sapiens GN=LPIN1 PE=1 SV=2
1.73697	0	0	2.54432	2	1.27302	0.979203	0.992155	2	2	-0.0267911	11.5833	1	0	>sp|Q14694|UBP10_HUMAN Ubiquitin carboxyl-terminal hydrolase 10 OS=Homo sapiens GN=USP10 PE=1 SV=2
0	1.16993	0	0	3.22239	1.8413	0.956087	0.981778	1	2	0.0703884	12.1667	1	0	>sp|Q14697|GANAB_HUMAN Neutral alpha-glucosidase AB OS=Homo sapiens GN=GANAB PE=1 SV=3
0	0.736966	1.11548	0	1.05889	0	0.335559	0.686745	2	1	0.479135	2.91667	1	0	>sp|Q14738|2A5D_HUMAN Serine/threonine-protein phosphatase 2A 56 kDa regulatory subunit delta isoform OS=Homo sapiens GN=PPP2R5D PE=1 SV=1
3.96963	3	4.1224	3.34577	0.938599	0	0.579082	0.86614	3	2	0.894949	48.1667	1	0	>sp|Q14739|LBR_HUMAN Lamin-B receptor OS=Homo sapiens GN=LBR PE=1 SV=2
2.66297	3.34577	0	3.07325	2.52356	2.02975	0.317869	0.686745	2	3	-1.08741	29.75	1	0	>sp|Q14746|COG2_HUMAN Conserved oligomeric Golgi complex subunit 2 OS=Homo sapiens GN=COG2 PE=1 SV=1
0	0.736966	0	0	0	0	0.373901	0.686745	0	1	-0.245655	0.666667	1	0	>sp|Q147U7|SMCO1_HUMAN Single-pass membrane and coiled-coil domain-containing protein 1 OS=Homo sapiens GN=SMCO1 PE=2 SV=2
0	0	1.11548	0	0	0	0.373901	0.686745	1	0	0.371826	1.16667	2	0.00780379	>sp|Q14807|KIF22_HUMAN Kinesin-like protein KIF22 OS=Homo sapiens GN=KIF22 PE=1 SV=5
0	0	3.11548	3.51307	1.62449	2.56478	0.763119	0.940709	2	2	-0.445962	25.0833	1	0	>sp|Q14814|MEF2D_HUMAN Myocyte-specific enhancer factor 2D OS=Homo sapiens GN=MEF2D PE=1 SV=1
4.37504	4.3837	2.45943	3.09452	3.22239	2.02975	0.845332	0.964759	3	3	0.182965	63.0833	2	0	>sp|Q14839|CHD4_HUMAN Chromodomain-helicase-DNA-binding protein 4 OS=Homo sapiens GN=CHD4 PE=1 SV=2
0	0	0	1	1.05889	0.5025	0.76197	0.940709	1	2	-0.147869	2.5	2	0	>sp|Q14847|LASP1_HUMAN LIM and SH3 domain protein 1 OS=Homo sapiens GN=LASP1 PE=1 SV=2
0	0	1.11548	0	0	1.77259	0.76939	0.940709	1	1	-0.219037	3.58333	2	0	>sp|Q14919|NC2A_HUMAN Dr1-associated corepressor OS=Homo sapiens GN=DRAP1 PE=1 SV=3
0	0	0	0	0	0	NaN	NaN	0	0	0	0	4	0.00338409	>sp|Q14964|RB39A_HUMAN Ras-related protein Rab-39A OS=Homo sapiens GN=RAB39A PE=1 SV=2
0	0	0	0.662965	0	0	0.373901	0.686745	0	1	-0.220988	0.583333	1	0	>sp|Q14974|IMB1_HUMAN Importin subunit beta-1 OS=Homo sapiens GN=KPNB1 PE=1 SV=2
0	0	0	0	3.73697	0	0.373901	0.686745	1	0	1.24566	12.3333	2	0	>sp|Q14980|NUMA1_HUMAN Nuclear mitotic apparatus protein 1 OS=Homo sapiens GN=NUMA1 PE=1 SV=2
2.54432	0	0	2.34577	1.05889	2.02975	0.816933	0.949404	2	2	-0.257436	13.0833	1	0	>sp|Q14C86|GAPD1_HUMAN GTPase-activating protein and VPS9 domain-containing protein 1 OS=Homo sapiens GN=GAPVD1 PE=1 SV=2
0	0	0	0	0	0.662965	0.373901	0.686745	0	1	-0.220988	0.583333	1	0.00654308	>sp|Q14CB8|RHG19_HUMAN Rho GTPase-activating protein 19 OS=Homo sapiens GN=ARHGAP19 PE=1 SV=1
0	0	0	2.3339	0	0	0.373901	0.686745	0	1	-0.777967	4.04167	2	0	>sp|Q14CN4|K2C72_HUMAN Keratin, type II cytoskeletal 72 OS=Homo sapiens GN=KRT72 PE=1 SV=2
0	0	0	0.736966	0	0	0.373901	0.686745	0	1	-0.245655	0.666667	1	0	>sp|Q14CX5|TM180_HUMAN Transmembrane protein 180 OS=Homo sapiens GN=TMEM180 PE=2 SV=1
1.32193	1.77259	2.05889	1.77259	0	0	0.951343	0.980796	2	2	-0.0547857	9.5	2	0	>sp|Q15003|CND2_HUMAN Condensin complex subunit 2 OS=Homo sapiens GN=NCAPH PE=1 SV=3
0	0	0	0	2.52356	0	0.373901	0.686745	1	0	0.841187	4.75	2	0	>sp|Q15005|SPCS2_HUMAN Signal peptidase complex subunit 2 OS=Homo sapiens GN=SPCS2 PE=1 SV=3
0	0	0	0	1.05889	1.77259	0.747018	0.940709	1	1	-0.237899	3.5	1	0	>sp|Q15006|EMC2_HUMAN ER membrane protein complex subunit 2 OS=Homo sapiens GN=EMC2 PE=1 SV=1
0.874469	1.27302	2.92283	2.02975	0	0	0.882771	0.972507	2	2	0.164845	11.9167	1	0	>sp|Q15007|FL2D_HUMAN Pre-mRNA-splicing regulator WTAP OS=Homo sapiens GN=WTAP PE=1 SV=2
3.88264	3.49185	3.57491	2.87447	4.36923	4.13614	0.36406	0.686745	3	3	0.441442	77.5	1	0	>sp|Q15008|PSMD6_HUMAN 26S proteasome non-ATPase regulatory subunit 6 OS=Homo sapiens GN=PSMD6 PE=1 SV=1
0.874469	1.27302	0.5025	0	0.415037	0	0.718515	0.929125	3	1	0.172996	3	1	0	>sp|Q15013|MD2BP_HUMAN MAD2L1-binding protein OS=Homo sapiens GN=MAD2L1BP PE=1 SV=1
1.36923	0	0	0	0	0	0.373901	0.686745	1	0	0.456411	1.58333	1	0	>sp|Q15018|F175B_HUMAN BRISC complex subunit Abro1 OS=Homo sapiens GN=FAM175B PE=1 SV=2
0	0	0	2.73697	0	0	0.373901	0.686745	0	1	-0.912322	5.66667	2	0	>sp|Q15019|SEPT2_HUMAN Septin-2 OS=Homo sapiens GN=SEPT2 PE=1 SV=1
0	0	0	0	0	0	NaN	NaN	0	0	0	0	1	0	>sp|Q15020|SART3_HUMAN Squamous cell carcinoma antigen recognized by T-cells 3 OS=Homo sapiens GN=SART3 PE=1 SV=1
3.47032	4.05889	0	4.4865	3.56478	2.56478	0.358192	0.686745	2	3	-1.35836	62.9167	1	0	>sp|Q15021|CND1_HUMAN Condensin complex subunit 1 OS=Homo sapiens GN=NCAPD2 PE=1 SV=3
0.874469	0	0	0	0	0	0.373901	0.686745	1	0	0.29149	0.833333	2	0.00917431	>sp|Q15022|SUZ12_HUMAN Polycomb protein SUZ12 OS=Homo sapiens GN=SUZ12 PE=1 SV=3
0	0.736966	0	0	0	0.662965	0.117227	0.686745	0	2	-0.466644	1.25	1	0	>sp|Q15024|EXOS7_HUMAN Exosome complex component RRP42 OS=Homo sapiens GN=EXOSC7 PE=1 SV=3
0	0	0	0	1.05889	1.27302	0.903351	0.972756	1	1	-0.0713749	2.5	1	0	>sp|Q15027|ACAP1_HUMAN Arf-GAP with coiled-coil, ANK repeat and PH domain-containing protein 1 OS=Homo sapiens GN=ACAP1 PE=1 SV=1
2.60486	1.41504	0	1.32193	0	1.54432	0.55593	0.853691	1	3	-0.558808	10.1667	1	0	>sp|Q15029|U5S1_HUMAN 116 kDa U5 small nuclear ribonucleoprotein component OS=Homo sapiens GN=EFTUD2 PE=1 SV=1
1.77259	1.77259	0.874469	2.54432	2.52356	2.56478	0.353068	0.686745	3	3	-0.570358	20.1667	1	0	>sp|Q15031|SYLM_HUMAN Probable leucine--tRNA ligase, mitochondrial OS=Homo sapiens GN=LARS2 PE=1 SV=2
0	0	0	0	0	0	NaN	NaN	0	0	0	0	1	0	>sp|Q15042|RB3GP_HUMAN Rab3 GTPase-activating protein catalytic subunit OS=Homo sapiens GN=RAB3GAP1 PE=1 SV=3
0	0	0	0	0	0	NaN	NaN	0	0	0	0	1	0	>sp|Q15046|SYK_HUMAN Lysine--tRNA ligase OS=Homo sapiens GN=KARS PE=1 SV=3
0	0	0	0	0	0	NaN	NaN	0	0	0	0	1	0	>sp|Q15048|LRC14_HUMAN Leucine-rich repeat-containing protein 14 OS=Homo sapiens GN=LRRC14 PE=2 SV=1
2.89077	2.75489	3.24793	2.73697	2	2.56478	0.945495	0.979283	3	3	0.0273536	34.25	1	0	>sp|Q15051|IQCB1_HUMAN IQ calmodulin-binding motif-containing protein 1 OS=Homo sapiens GN=IQCB1 PE=1 SV=1
0	0.938599	1.22239	0	1.54432	2.96963	0.721508	0.929125	2	2	-0.380504	11	1	0	>sp|Q15054|DPOD3_HUMAN DNA polymerase delta subunit 3 OS=Homo sapiens GN=POLD3 PE=1 SV=2
0	0	0	0	1.62449	0	0.373901	0.686745	1	0	0.541497	2.08333	1	0	>sp|Q15056|IF4H_HUMAN Eukaryotic translation initiation factor 4H OS=Homo sapiens GN=EIF4H PE=1 SV=5
0.321928	0	0	1.27302	0	0	0.508971	0.821805	1	1	-0.31703	1.66667	1	0.00182149	>sp|Q15057|ACAP2_HUMAN Arf-GAP with coiled-coil, ANK repeat and PH domain-containing protein 2 OS=Homo sapiens GN=ACAP2 PE=1 SV=3
2.48113	1.82443	3.11548	2.02975	2.52356	2.02975	0.0259854	0.686745	3	3	0.745414	25.7083	2	0	>sp|Q15070|OXA1L_HUMAN Mitochondrial inner membrane protein OXA1L OS=Homo sapiens GN=OXA1L PE=1 SV=3
2.32193	0	2.71882	2.29768	3.47032	0	0.0685413	0.686745	3	1	2.07113	23.5833	1	0	>sp|Q15084|PDIA6_HUMAN Protein disulfide-isomerase A6 OS=Homo sapiens GN=PDIA6 PE=1 SV=1
0	0	0	0	0	0.5025	0.373901	0.686745	0	1	-0.1675	0.416667	2	0	>sp|Q15102|PA1B3_HUMAN Platelet-activating factor acetylhydrolase IB subunit gamma OS=Homo sapiens GN=PAFAH1B3 PE=1 SV=1
0	0	0	0.662965	0	0.5025	0.123602	0.686745	0	2	-0.388488	1	1	0	>sp|Q15118|PDK1_HUMAN [Pyruvate dehydrogenase (acetyl-transferring)] kinase isozyme 1, mitochondrial OS=Homo sapiens GN=PDK1 PE=1 SV=1
0	0	0	0	1.05889	0	0.373901	0.686745	1	0	0.352965	1.08333	1	0.00646204	>sp|Q15119|PDK2_HUMAN [Pyruvate dehydrogenase (acetyl-transferring)] kinase isozyme 2, mitochondrial OS=Homo sapiens GN=PDK2 PE=1 SV=2
0	0	2.41504	0	2.52356	1.27302	0.257706	0.686745	2	1	1.22186	10.5	1	0	>sp|Q15120|PDK3_HUMAN [Pyruvate dehydrogenase (acetyl-transferring)] kinase isozyme 3, mitochondrial OS=Homo sapiens GN=PDK3 PE=1 SV=1
0	0	0	0	1.05889	0	0.373901	0.686745	1	0	0.352965	1.08333	1	0	>sp|Q15126|PMVK_HUMAN Phosphomevalonate kinase OS=Homo sapiens GN=PMVK PE=1 SV=3
4.88671	5.44294	0	4.4865	4.36923	4.40372	0.345877	0.686745	2	3	-1.69241	132.333	1	0	>sp|Q15149|PLEC_HUMAN Plectin OS=Homo sapiens GN=PLEC PE=1 SV=3
4.54689	4.58496	2.82443	4.09803	3.56478	3.42626	0.551005	0.853691	3	3	-0.391051	88.1667	2	0	>sp|Q15155|NOMO1_HUMAN Nodal modulator 1 OS=Homo sapiens GN=NOMO1 PE=1 SV=5
0	0	0	0	0	2.02975	0.373901	0.686745	0	1	-0.676582	3.08333	1	0	>sp|Q15181|IPYR_HUMAN Inorganic pyrophosphatase OS=Homo sapiens GN=PPA1 PE=1 SV=2
0	0	0	0	0.415037	0	0.373901	0.686745	1	0	0.138346	0.333333	2	0.00339847	>sp|Q15185|TEBP_HUMAN Prostaglandin E synthase 3 OS=Homo sapiens GN=PTGES3 PE=1 SV=1
1.32193	0	2.05889	2.02975	1.62449	0	0.23471	0.686745	3	1	0.991855	9.83333	1	0	>sp|Q15208|STK38_HUMAN Serine/threonine-protein kinase 38 OS=Homo sapiens GN=STK38 PE=1 SV=1
2.5025	0	3.96963	2.80735	0	0	0.4582	0.77931	2	1	1.22159	25.3333	1	0	>sp|Q15233|NONO_HUMAN Non-POU domain-containing octamer-binding protein OS=Homo sapiens GN=NONO PE=1 SV=4
0.874469	0	1.73697	2.02975	0	0	0.829198	0.958172	2	1	0.193896	6.25	2	0	>sp|Q15269|PWP2_HUMAN Periodic tryptophan protein 2 homolog OS=Homo sapiens GN=PWP2 PE=2 SV=2
0	0	0	0	0.415037	0	0.373901	0.686745	1	0	0.138346	0.333333	1	0	>sp|Q15276|RABE1_HUMAN Rab GTPase-binding effector protein 1 OS=Homo sapiens GN=RABEP1 PE=1 SV=2
0	0	0.5025	0	1.05889	0.662965	0.471777	0.789828	2	1	0.299476	2.08333	2	0	>sp|Q15283|RASA2_HUMAN Ras GTPase-activating protein 2 OS=Homo sapiens GN=RASA2 PE=1 SV=3
0	0	0	0	1.62449	1.77259	0.95384	0.980796	1	1	-0.0493662	4.5	2	0	>sp|Q15286|RAB35_HUMAN Ras-related protein Rab-35 OS=Homo sapiens GN=RAB35 PE=1 SV=1
0	0	0.5025	0	0	0	0.373901	0.686745	1	0	0.1675	0.416667	1	0	>sp|Q15291|RBBP5_HUMAN Retinoblastoma-binding protein 5 OS=Homo sapiens GN=RBBP5 PE=1 SV=2
0.222392	0	0	0	0	2.77259	0.411101	0.731348	1	1	-0.850066	6	1	0	>sp|Q15293|RCN1_HUMAN Reticulocalbin-1 OS=Homo sapiens GN=RCN1 PE=1 SV=1
0	0	0	0	2.32193	0	0.373901	0.686745	1	0	0.773976	4	1	0	>sp|Q15306|IRF4_HUMAN Interferon regulatory factor 4 OS=Homo sapiens GN=IRF4 PE=1 SV=1
0	2.51307	0	0	0	0	0.373901	0.686745	0	1	-0.83769	4.70833	2	0	>sp|Q15323|K1H1_HUMAN Keratin, type I cuticular Ha1 OS=Homo sapiens GN=KRT31 PE=1 SV=3
1.32193	0	0	1.77259	1.62449	0.662965	0.824282	0.954676	2	2	0.170288	6.58333	2	0	>sp|Q15345|LRC41_HUMAN Leucine-rich repeat-containing protein 41 OS=Homo sapiens GN=LRRC41 PE=1 SV=3
0	0	0	1.27302	0	0	0.373901	0.686745	0	1	-0.424339	1.41667	3	0.00208333	>sp|Q15349|KS6A2_HUMAN Ribosomal protein S6 kinase alpha-2 OS=Homo sapiens GN=RPS6KA2 PE=1 SV=2
2.1964	0	3.57491	0	3.54432	3.66297	0.221644	0.686745	3	1	1.88422	36.8333	1	0	>sp|Q15365|PCBP1_HUMAN Poly(rC)-binding protein 1 OS=Homo sapiens GN=PCBP1 PE=1 SV=2
2.69116	0	1.5025	0	3.10154	1.87447	0.083469	0.686745	3	1	1.80691	17.5417	2	0	>sp|Q15366|PCBP2_HUMAN Poly(rC)-binding protein 2 OS=Homo sapiens GN=PCBP2 PE=1 SV=1
1.32193	1.36923	0	0	2.32193	0	0.403657	0.721399	2	1	0.758207	7.08333	1	0	>sp|Q15382|RHEB_HUMAN GTP-binding protein Rheb OS=Homo sapiens GN=RHEB PE=1 SV=1
2.99247	2.29768	0	3.18322	3.36923	3.87447	0.437948	0.762477	2	3	-0.99789	41.9583	1	0	>sp|Q15386|UBE3C_HUMAN Ubiquitin-protein ligase E3C OS=Homo sapiens GN=UBE3C PE=1 SV=3
0	0	1.11548	0	0	0	0.373901	0.686745	1	0	0.371826	1.16667	1	0	>sp|Q15388|TOM20_HUMAN Mitochondrial import receptor subunit TOM20 homolog OS=Homo sapiens GN=TOMM20 PE=1 SV=1
0.874469	0.736966	1.27302	1.27302	0.415037	0	0.699897	0.923401	3	2	0.18418	4.66667	2	0	>sp|Q15390|MTFR1_HUMAN Mitochondrial fission regulator 1 OS=Homo sapiens GN=MTFR1 PE=1 SV=2
0.321928	0	0	0	0	0	0.373901	0.686745	1	0	0.107309	0.25	2	0.00452489	>sp|Q15392|DHC24_HUMAN Delta(24)-sterol reductase OS=Homo sapiens GN=DHCR24 PE=1 SV=2
2.70966	0	0	0	0	0	0.373901	0.686745	1	0	0.903219	5.54167	1	0	>sp|Q15393|SF3B3_HUMAN Splicing factor 3B subunit 3 OS=Homo sapiens GN=SF3B3 PE=1 SV=4
0	0	0	0	0	0	NaN	NaN	0	0	0	0	1	0.00804829	>sp|Q15397|K0020_HUMAN Pumilio domain-containing protein KIAA0020 OS=Homo sapiens GN=KIAA0020 PE=1 SV=3
0	0	3.24793	3.11548	0	0	0.977932	0.992155	1	1	0.0441501	16.1667	1	0	>sp|Q15404|RSU1_HUMAN Ras suppressor protein 1 OS=Homo sapiens GN=RSU1 PE=1 SV=3
0	1.36923	0	0	1.05889	0	0.866423	0.969525	1	1	-0.103447	2.66667	1	0	>sp|Q15417|CNN3_HUMAN Calponin-3 OS=Homo sapiens GN=CNN3 PE=1 SV=1
0	0	0	0	0	0	NaN	NaN	0	0	0	0	1	0	>sp|Q15427|SF3B4_HUMAN Splicing factor 3B subunit 4 OS=Homo sapiens GN=SF3B4 PE=1 SV=1
0	0	1.11548	1.77259	0	0	0.76939	0.940709	1	1	-0.219037	3.58333	1	0	>sp|Q15428|SF3A2_HUMAN Splicing factor 3A subunit 2 OS=Homo sapiens GN=SF3A2 PE=1 SV=2
0	0	0	0	1.05889	0.662965	0.767158	0.940709	1	1	0.131976	1.66667	2	0	>sp|Q15435|PP1R7_HUMAN Protein phosphatase 1 regulatory subunit 7 OS=Homo sapiens GN=PPP1R7 PE=1 SV=1
0	1.87447	0	0	0	0	0.373901	0.686745	0	1	-0.624823	2.66667	2	0	>sp|Q15436|SC23A_HUMAN Protein transport protein Sec23A OS=Homo sapiens GN=SEC23A PE=1 SV=2
2.66297	0	0.874469	0	0	0	0.206867	0.686745	2	0	1.17914	6.16667	1	0	>sp|Q15437|SC23B_HUMAN Protein transport protein Sec23B OS=Homo sapiens GN=SEC23B PE=1 SV=2
[truncated: 10,330 more rows]

## Sheet: Selected proteins repl=3 fold=2
R4_Z138	R4_ZBR	R5_Z138	R5_ZBR	R8_Z138	R8_ZBR	P	Pcorrect	X..rep.Z138	X..rep.ZBR	M.Z138vsZBR	Sum	E	FDR	pro	GN
2.05649	4.659	0.205114	5.38634	4.19092	5.28437	0.0652923	0.677776	3	3	-2.95907	124.25	1	0	>sp|P49411|EFTU_HUMAN Elongation factor Tu, mitochondrial OS=Homo sapiens GN=TUFM PE=1 SV=2	TUFM
0	2.38082	0	2.38082	0.571542	2.52356	0.000338135	0.355752	1	3	-2.23789	13.75	1	0	>sp|P06702|S10A9_HUMAN Protein S100-A9 OS=Homo sapiens GN=S100A9 PE=1 SV=1	S100A9
0	3.42019	2.38082	3.17159	0	2.38082	0.0616373	0.677776	1	3	-2.19726	25.6667	1	0	>sp|Q2KHR3|QSER1_HUMAN Glutamine and serine-rich protein 1 OS=Homo sapiens GN=QSER1 PE=1 SV=3	QSER1
0.169925	2.66297	2.25214	3.45029	0	2.49541	0.0576762	0.677776	2	3	-2.0622	23	1	0	>sp|Q58FF6|H90B4_HUMAN Putative heat shock protein HSP 90-beta 4 OS=Homo sapiens GN=HSP90AB4P PE=5 SV=1	HSP90AB4P
0	2.02729	0	0.969626	0	3.04075	0.0281507	0.677776	0	3	-2.01255	10.6667	1	0	>tr|H0YMW4|H0YMW4_HUMAN Annexin (Fragment) OS=Homo sapiens GN=ANXA2 PE=1 SV=1	ANXA2
0	1.81307	1.89616	2.93336	0	3.14975	0.0571868	0.677776	1	3	-2	19.1667	2	0	>tr|H0Y2W2|H0Y2W2_HUMAN ATPase family AAA domain-containing protein 3A (Fragment) OS=Homo sapiens GN=ATAD3A PE=1 SV=1	ATAD3A
0.169925	3.55032	2.36923	3.30226	2.64225	4.22293	0.0769455	0.677776	3	3	-1.9647	48.7083	1	0	>sp|P02545|LMNA_HUMAN Prelamin-A/C OS=Homo sapiens GN=LMNA PE=1 SV=1	LMNA
0	3.26262	0	1.0199	0	1.44846	0.0498604	0.677776	0	3	-1.91033	11.4167	1	0	>sp|A5A3E0|POTEF_HUMAN POTE ankyrin domain family member F OS=Homo sapiens GN=POTEF PE=1 SV=2	POTEF
0	0.874469	0	2.77844	0	2.078	0.0263933	0.677776	0	3	-1.9103	9.41667	1	0	>sp|P47929|LEG7_HUMAN Galectin-7 OS=Homo sapiens GN=LGALS7 PE=1 SV=2	LGALS7
0	1.32193	0	1.90689	0	2.39232	0.00375434	0.677776	0	3	-1.87371	8.41667	1	0	>tr|A0A087X1V9|A0A087X1V9_HUMAN Beta-2-microglobulin OS=Homo sapiens GN=IGKC PE=1 SV=2	IGKC
0	2.02729	0	1.37311	0	2.16323	0.00160522	0.675539	0	3	-1.85454	7.75	1	0	>sp|Q7L8L6|FAKD5_HUMAN FAST kinase domain-containing protein 5 OS=Homo sapiens GN=FASTKD5 PE=1 SV=1	FASTKD5
0	2.58162	0	2.38082	0.795859	1.2647	0.0206598	0.677776	1	3	-1.81043	11.5	1	0	>tr|H7C1Q9|H7C1Q9_HUMAN Protein transport protein Sec61 subunit alpha isoform 2 (Fragment) OS=Homo sapiens GN=SEC61A2 PE=3 SV=1	SEC61A2
0	2.58162	0	2.75192	1.16993	1.2647	0.0414294	0.677776	1	3	-1.80944	13.5	3	0	>tr|F8W026|F8W026_HUMAN Endoplasmin (Fragment) OS=Homo sapiens GN=HSP90B1 PE=1 SV=6	HSP90B1
0	2.09217	2.09217	2.38082	0	2.97982	0.0744188	0.677776	1	3	-1.78688	17.1667	1	0	>sp|Q8N584|TT39C_HUMAN Tetratricopeptide repeat protein 39C OS=Homo sapiens GN=TTC39C PE=2 SV=2	TTC39C
1.81307	3.54174	0	3.558	2.92019	2.97982	0.110515	0.677776	2	3	-1.7821	37.5833	1	0	>tr|E5RFK7|E5RFK7_HUMAN E3 ubiquitin-protein ligase UBR5 (Fragment) OS=Homo sapiens GN=UBR5 PE=1 SV=1	UBR5
4.84619	5.49896	0	4.5597	4.23894	4.30859	0.323983	0.677776	2	3	-1.76071	132.333	1	0	>sp|Q15149|PLEC_HUMAN Plectin OS=Homo sapiens GN=PLEC PE=1 SV=3	PLEC
0	2.38082	0.481127	2.078	0	1.2647	0.00913678	0.677776	1	3	-1.74747	9	1	0	>sp|Q10471|GALT2_HUMAN Polypeptide N-acetylgalactosaminyltransferase 2 OS=Homo sapiens GN=GALNT2 PE=1 SV=1	GALNT2
0	1.32193	0	1.5025	0	2.39232	0.00627083	0.677776	0	3	-1.73892	7.41667	2	0	>tr|A0A087WWV8|A0A087WWV8_HUMAN Protein IGKV1-8 OS=Homo sapiens GN=IGKV1-8 PE=4 SV=1	IGKV1-8
0	1.32193	0	1.5025	0	2.39232	0.00627083	0.677776	0	3	-1.73892	7.41667	1	0	>tr|A0A087WZW8|A0A087WZW8_HUMAN Protein IGKV3-11 OS=Homo sapiens GN=IGKV3-11 PE=4 SV=1	IGKV3-11
0	2.32493	0	1.8635	1.80735	2.77844	0.0591396	0.677776	1	3	-1.71984	15.25	1	0	>sp|Q96JB5|CK5P3_HUMAN CDK5 regulatory subunit-associated protein 3 OS=Homo sapiens GN=CDK5RAP3 PE=1 SV=2	CDK5RAP3
2.30986	2.25214	0	2.77844	0	2.38082	0.0965322	0.677776	1	3	-1.70052	16.5833	2	0	>sp|C4AMC7|WASH3_HUMAN Putative WAS protein family homolog 3 OS=Homo sapiens GN=WASH3P PE=1 SV=2	WASH3P
2.30986	2.25214	0	2.77844	0	2.38082	0.0965322	0.677776	1	3	-1.70052	16.5833	2	0	>sp|Q6VEQ5|WASH2_HUMAN WAS protein family homolog 2 OS=Homo sapiens GN=WASH2P PE=2 SV=2	WASH2P
2.30986	2.25214	0	2.77844	0	2.38082	0.0965322	0.677776	1	3	-1.70052	16.5833	2	0	>tr|A0A096LP75|A0A096LP75_HUMAN Protein LOC102723897 OS=Homo sapiens GN=LOC102723897 PE=4 SV=1	LOC102723897
1.0199	1.81307	0	1.77259	0.133856	2.58496	0.0157432	0.677776	2	3	-1.67229	10.9167	2	0	>tr|E9PJS0|E9PJS0_HUMAN Acetolactate synthase-like protein (Fragment) OS=Homo sapiens GN=ILVBL PE=1 SV=1	ILVBL
0	2.98363	1.98995	3.50691	2.23522	2.71882	0.0895026	0.677776	2	3	-1.6614	29.9167	2	0	>sp|Q6DN90|IQEC1_HUMAN IQ motif and SEC7 domain-containing protein 1 OS=Homo sapiens GN=IQSEC1 PE=1 SV=1	IQSEC1
0	1.81307	0	1.2647	0	1.77259	0.000787244	0.435926	0	3	-1.61679	6.25	2	0	>tr|A0A087WWI4|A0A087WWI4_HUMAN Hypoxia up-regulated protein 1 OS=Homo sapiens GN=HYOU1 PE=1 SV=1	HYOU1
0	3.12009	3.56394	3.22239	1.96963	4.04044	0.205754	0.677776	2	3	-1.61645	45.5833	1	0	>sp|Q96PK6|RBM14_HUMAN RNA-binding protein 14 OS=Homo sapiens GN=RBM14 PE=1 SV=2	RBM14
0	2.92283	0	1.57154	2.08746	2.38082	0.116446	0.677776	1	3	-1.59591	16.8333	2	0	>sp|P45880|VDAC2_HUMAN Voltage-dependent anion-selective channel protein 2 OS=Homo sapiens GN=VDAC2 PE=1 SV=2	VDAC2
0	1.71882	0	1.77259	0	1.2647	0.000597743	0.398267	0	3	-1.58537	5.66667	2	0	>tr|Q5H907|Q5H907_HUMAN Melanoma antigen family D, 2, isoform CRA_d OS=Homo sapiens GN=MAGED2 PE=1 SV=1	MAGED2
0	1.32193	1.32992	2.078	0	2.65583	0.0552686	0.677776	1	3	-1.57528	10.75	1	0	>sp|Q5T2N8|ATD3C_HUMAN ATPase family AAA domain-containing protein 3C OS=Homo sapiens GN=ATAD3C PE=2 SV=2	ATAD3C
0	2.42999	0	1.2647	0.795859	1.77259	0.0221879	0.677776	1	3	-1.55714	9.08333	3	0	>tr|H0YAL2|H0YAL2_HUMAN Pachytene checkpoint protein 2 homolog (Fragment) OS=Homo sapiens GN=TRIP13 PE=1 SV=1	TRIP13
0	2.06369	1.81307	2.77844	0.133856	1.77259	0.0764897	0.677776	2	3	-1.55593	13.9167	1	0	>sp|Q8WX92|NELFB_HUMAN Negative elongation factor B OS=Homo sapiens GN=NELFB PE=1 SV=1	NELFB
0	2.09217	0.481127	1.2647	0	1.77259	0.00587133	0.677776	1	3	-1.54945	7.41667	3	0	>tr|E9PI04|E9PI04_HUMAN Synembryn-A (Fragment) OS=Homo sapiens GN=RIC8A PE=1 SV=1	RIC8A
2.96835	4.21621	0	4.61266	3.80879	2.58496	0.303881	0.677776	2	3	-1.54557	66.1667	1	0	>sp|Q9NVI1|FANCI_HUMAN Fanconi anemia group I protein OS=Homo sapiens GN=FANCI PE=1 SV=4	FANCI
0	1.76671	0	2.38082	0.795859	1.2647	0.0211425	0.677776	1	3	-1.53879	8.91667	2	0	>tr|C9JXC6|C9JXC6_HUMAN Protein transport protein Sec61 subunit alpha isoform 1 (Fragment) OS=Homo sapiens GN=SEC61A1 PE=1 SV=1	SEC61A1
0	0.675565	0	2.1247	0	1.77259	0.025051	0.677776	0	3	-1.52428	6.58333	1	0	>tr|A0A0D9SF80|A0A0D9SF80_HUMAN General transcription factor II-I repeat domain-containing protein 2A OS=Homo sapiens GN=GTF2IRD2B PE=4 SV=1	GTF2IRD2B
3.4963	3.81378	2.36923	2.6787	0.523562	4.36923	0.209934	0.677776	3	3	-1.49087	55.2917	2	0	>tr|B7Z3Z9|B7Z3Z9_HUMAN Long-chain-fatty-acid--CoA ligase 1 OS=Homo sapiens GN=ACSL1 PE=1 SV=1	ACSL1
3.42533	4.13328	0	4.5597	3.42626	2.58496	0.316501	0.677776	2	3	-1.47545	62.9167	1	0	>sp|Q15021|CND1_HUMAN Condensin complex subunit 1 OS=Homo sapiens GN=NCAPD2 PE=1 SV=3	NCAPD2
0	1.13386	0	1.84688	0	1.44478	0.00202726	0.677776	0	3	-1.47517	5.33333	1	0	>sp|O95294|RASL1_HUMAN RasGAP-activating-like protein 1 OS=Homo sapiens GN=RASAL1 PE=1 SV=3	RASAL1
4.81021	5.28437	0	3.4963	3.8635	4.30859	0.398682	0.710215	2	3	-1.47185	109.125	1	0	>tr|A0A0D9SFY5|A0A0D9SFY5_HUMAN Lamin-B1 (Fragment) OS=Homo sapiens GN=LMNB1 PE=1 SV=1	LMNB1
0	1.32193	0	2.078	0.795859	1.77259	0.0133037	0.677776	1	3	-1.45889	8	1	0	>sp|Q8N122|RPTOR_HUMAN Regulatory-associated protein of mTOR OS=Homo sapiens GN=RPTOR PE=1 SV=1	RPTOR
2.6677	4.02329	0	3.52269	2.92019	2.39232	0.239899	0.677776	2	3	-1.45014	41.4167	1	0	>sp|Q8WWM7|ATX2L_HUMAN Ataxin-2-like protein OS=Homo sapiens GN=ATXN2L PE=1 SV=2	ATXN2L
0	0.584963	0	2.38082	0.795859	2.078	0.0827929	0.677776	1	3	-1.41598	8.41667	1	0	>tr|F8W9S7|F8W9S7_HUMAN GTPase-activating protein and VPS9 domain-containing protein 1 OS=Homo sapiens GN=GAPVD1 PE=1 SV=1	GAPVD1
1.81307	2.09217	0.481127	2.77844	0.133856	1.77259	0.0763949	0.677776	3	3	-1.40505	14.4167	1	0	>sp|Q9NP61|ARFG3_HUMAN ADP-ribosylation factor GTPase-activating protein 3 OS=Homo sapiens GN=ARFGAP3 PE=1 SV=1	ARFGAP3
3.61839	3.73546	2.74595	4.23229	0	2.58496	0.307352	0.677776	2	3	-1.39612	52.2083	1	0	>sp|O14497|ARI1A_HUMAN AT-rich interactive domain-containing protein 1A OS=Homo sapiens GN=ARID1A PE=1 SV=3	ARID1A
0	3.11894	1.4667	1.0199	0	1.5025	0.157415	0.677776	1	3	-1.39155	12.625	1	0	>sp|Q6S8J3|POTEE_HUMAN POTE ankyrin domain family member E OS=Homo sapiens GN=POTEE PE=1 SV=3	POTEE
0	2.09217	0	0.949016	0.133856	1.2647	0.0155324	0.677776	1	3	-1.39068	5.66667	3	0	>tr|Q5VYD6|Q5VYD6_HUMAN HCLS1-associated protein X-1 (Fragment) OS=Homo sapiens GN=HAX1 PE=1 SV=1	HAX1
3.51307	2.70352	0	4.27871	2.21809	2.90555	0.290632	0.677776	2	3	-1.38554	44.4583	2	0	>tr|M0QZR8|M0QZR8_HUMAN DNA polymerase OS=Homo sapiens GN=POLD1 PE=1 SV=1	POLD1
0.748938	2.54604	1.33787	1.92283	0	1.77259	0.0379633	0.677776	2	3	-1.38488	12.0417	2	0	>sp|O00471|EXOC5_HUMAN Exocyst complex component 5 OS=Homo sapiens GN=EXOC5 PE=1 SV=1	EXOC5
2.078	1.76671	0	2.38082	0	2.078	0.125296	0.677776	1	3	-1.38251	12.3333	2	0	>sp|A8K0Z3|WASH1_HUMAN WAS protein family homolog 1 OS=Homo sapiens GN=WASH1 PE=1 SV=2	WASH1
2.20511	3.38754	1.32992	3.3159	2.58162	3.47933	0.022235	0.677776	3	3	-1.35537	38.8333	2	0	>sp|Q8IUR7|ARMC8_HUMAN Armadillo repeat-containing protein 8 OS=Homo sapiens GN=ARMC8 PE=1 SV=2	ARMC8
0	3.09803	0	1.2647	2.37697	2.078	0.228432	0.677776	1	3	-1.35459	16.6667	2	0	>sp|Q6Y7W6|PERQ2_HUMAN PERQ amino acid-rich with GYF domain-containing protein 2 OS=Homo sapiens GN=GIGYF2 PE=1 SV=1	GIGYF2
0	0.611435	0	1.37311	0	2.078	0.0329686	0.677776	0	3	-1.35418	4.83333	2	0	>tr|E9PPN3|E9PPN3_HUMAN N-terminal kinase-like protein OS=Homo sapiens GN=SCYL1 PE=1 SV=1	SCYL1
0	2.09217	0	1.2647	0	0.675565	0.0307452	0.677776	0	3	-1.34415	5.16667	1	0	>tr|H7C0I1|H7C0I1_HUMAN Late secretory pathway protein AVL9 homolog (Fragment) OS=Homo sapiens GN=AVL9 PE=1 SV=1	AVL9
1.81307	1.81307	0.133856	1.77259	0	2.38082	0.0950735	0.677776	2	3	-1.33985	11.5833	3	0	>tr|A0A0A0MSH6|A0A0A0MSH6_HUMAN Lipid droplet-associated hydrolase OS=Homo sapiens GN=LDAH PE=1 SV=1	LDAH
3.68728	3.78209	2.56139	4.03556	0	2.45029	0.325572	0.677776	2	3	-1.33976	49.9167	2	0	>tr|A8MXP9|A8MXP9_HUMAN Matrin-3 OS=Homo sapiens GN=MATR3 PE=1 SV=1	MATR3
0	3.42019	2.20511	3.45029	2.20076	1.55459	0.237574	0.677776	2	3	-1.33973	29.25	2	0	>tr|F8VZJ2|F8VZJ2_HUMAN Nascent polypeptide-associated complex subunit alpha OS=Homo sapiens GN=NACA PE=1 SV=1	NACA
1.0199	1.76671	0.481127	2.58496	0.133856	1.2647	0.0456648	0.677776	3	3	-1.32717	10.1667	1	0	>tr|H0YEN4|H0YEN4_HUMAN Nuclear pore complex protein Nup98-Nup96 (Fragment) OS=Homo sapiens GN=NUP98 PE=1 SV=1	NUP98
0	2.54604	2.92811	2.88807	0	1.45578	0.283643	0.677776	1	3	-1.32059	18.5417	1	0	>sp|Q92499|DDX1_HUMAN ATP-dependent RNA helicase DDX1 OS=Homo sapiens GN=DDX1 PE=1 SV=2	DDX1
1.81307	2.42999	0	1.53743	0	1.77259	0.118657	0.677776	1	3	-1.30898	11	3	0	>tr|B1AHA9|B1AHA9_HUMAN DNA replication licensing factor MCM5 (Fragment) OS=Homo sapiens GN=MCM5 PE=1 SV=6	MCM5
1.81307	3.0199	2.74595	3.39279	0.429988	2.49541	0.144381	0.677776	3	3	-1.30636	29.5417	1	0	>sp|Q92609|TBCD5_HUMAN TBC1 domain family member 5 OS=Homo sapiens GN=TBC1D5 PE=1 SV=1	TBC1D5
0	1.76671	1.09686	2.078	0.133856	1.2647	0.036705	0.677776	2	3	-1.2929	8.33333	2	0	>sp|Q13485|SMAD4_HUMAN Mothers against decapentaplegic homolog 4 OS=Homo sapiens GN=SMAD4 PE=1 SV=1	SMAD4
1.81307	2.38082	0	1.2647	0.5025	2.52356	0.128173	0.677776	2	3	-1.28451	13.3333	1	0	>sp|Q96AJ9|VTI1A_HUMAN Vesicle transport through interaction with t-SNAREs homolog 1A OS=Homo sapiens GN=VTI1A PE=1 SV=2	VTI1A
0	1.59163	0	2.38082	0.795859	0.675565	0.0834334	0.677776	1	3	-1.28405	7.33333	2	0	>tr|H0YEF7|H0YEF7_HUMAN Phosphatidylinositol-binding clathrin assembly protein (Fragment) OS=Homo sapiens GN=PICALM PE=1 SV=1	PICALM
0	1.76671	2.09217	2.38082	0	1.77259	0.153889	0.677776	1	3	-1.27598	12	1	0	>tr|B1AMT4|B1AMT4_HUMAN Cohesin subunit SA-2 (Fragment) OS=Homo sapiens GN=STAG2 PE=1 SV=1	STAG2
2.06369	2.76965	2.32593	2.77844	0	2.65583	0.159398	0.677776	2	3	-1.27143	22.8333	1	0	>sp|Q9H9H4|VP37B_HUMAN Vacuolar protein sorting-associated protein 37B OS=Homo sapiens GN=VPS37B PE=1 SV=1	VPS37B
1.31389	3.54174	3.01557	2.93336	1.32193	2.97982	0.101614	0.677776	3	3	-1.26785	33.75	1	0	>sp|Q8WXF1|PSPC1_HUMAN Paraspeckle component 1 OS=Homo sapiens GN=PSPC1 PE=1 SV=1	PSPC1
0.760812	0.584963	0.133856	2.38082	0.5025	2.20511	0.103997	0.677776	3	3	-1.25791	9.5	3	0	>tr|C9J673|C9J673_HUMAN Exportin-1 (Fragment) OS=Homo sapiens GN=XPO1 PE=1 SV=1	XPO1
2.81093	2.76965	0	3.74745	2.41128	2.47032	0.260725	0.677776	2	3	-1.25507	34	2	0	>tr|M0QY96|M0QY96_HUMAN Heterogeneous nuclear ribonucleoprotein M (Fragment) OS=Homo sapiens GN=HNRNPM PE=1 SV=1	HNRNPM
0	1.81307	1.09686	1.77259	0	1.2647	0.0368607	0.677776	1	3	-1.25117	7.41667	1	0	>sp|Q96S52|PIGS_HUMAN GPI transamidase component PIG-S OS=Homo sapiens GN=PIGS PE=1 SV=3	PIGS
2.98236	2.66297	0	3.61716	3.55374	4.00562	0.346219	0.677776	2	3	-1.24989	50.7083	2	0	>sp|Q92540|SMG7_HUMAN Protein SMG7 OS=Homo sapiens GN=SMG7 PE=1 SV=2	SMG7
0	1.76671	2.29768	1.84688	0	2.39232	0.193033	0.677776	1	3	-1.23608	12.75	2	0	>tr|B4DW73|B4DW73_HUMAN Phosphoenolpyruvate carboxykinase [GTP], mitochondrial OS=Homo sapiens GN=PCK2 PE=1 SV=1	PCK2
5.43625	5.86074	0	4.36923	4.60569	3.44846	0.544151	0.826239	2	3	-1.21217	144.25	1	0	>sp|P78527|PRKDC_HUMAN DNA-dependent protein kinase catalytic subunit OS=Homo sapiens GN=PRKDC PE=1 SV=3	PRKDC
1.34577	2.76965	1.76081	2.99247	0.795859	1.77259	0.0607708	0.677776	3	3	-1.21075	19.75	2	0	>tr|G3V1P5|G3V1P5_HUMAN Mediator of RNA polymerase II transcription subunit 15 OS=Homo sapiens GN=MED15 PE=1 SV=1	MED15
1.81307	2.38082	1.09686	2.078	0	2.078	0.0874325	0.677776	2	3	-1.20897	13.8333	1	0	>sp|Q5T6F2|UBAP2_HUMAN Ubiquitin-associated protein 2 OS=Homo sapiens GN=UBAP2 PE=1 SV=1	UBAP2
0	2.47393	0	1.02975	2.75192	2.86212	0.324571	0.677776	1	3	-1.20463	17.8333	1	0	>sp|Q9UQ16|DYN3_HUMAN Dynamin-3 OS=Homo sapiens GN=DNM3 PE=1 SV=4	DNM3
2.20511	2.25214	0	2.99247	1.80735	2.38082	0.167826	0.677776	2	3	-1.20432	20.3333	1	0	>sp|Q9P0N9|TBCD7_HUMAN TBC1 domain family member 7 OS=Homo sapiens GN=TBC1D7 PE=1 SV=1	TBC1D7
0	3.884	5.15903	4.37214	4.96	5.45749	0.53124	0.819239	2	3	-1.1982	138.125	1	0	>sp|Q5T4S7|UBR4_HUMAN E3 ubiquitin-protein ligase UBR4 OS=Homo sapiens GN=UBR4 PE=1 SV=1	UBR4
3.0613	3.15538	3.14579	3.33191	0	3.31389	0.31201	0.677776	2	3	-1.19803	40.5	1	0	>sp|Q86Y56|DAAF5_HUMAN Dynein assembly factor 5, axonemal OS=Homo sapiens GN=DNAAF5 PE=1 SV=4	DNAAF5
1.27302	1.13386	0.133856	2.078	0	1.77259	0.0718459	0.677776	2	3	-1.19252	7.83333	1	0	>sp|Q96NB2|SFXN2_HUMAN Sideroflexin-2 OS=Homo sapiens GN=SFXN2 PE=1 SV=2	SFXN2
0	2.06369	0	1.02975	1.32193	1.77259	0.0928766	0.677776	1	3	-1.18137	8.66667	3	0	>tr|H3BV15|H3BV15_HUMAN Nuclear pore complex protein Nup93 (Fragment) OS=Homo sapiens GN=NUP93 PE=1 SV=1	NUP93
1.77844	2.30986	0	1.37311	0.133856	1.77259	0.135455	0.677776	2	3	-1.18108	10	4	0	>tr|M0R2C7|M0R2C7_HUMAN Rho guanine nucleotide exchange factor 1 (Fragment) OS=Homo sapiens GN=ARHGEF1 PE=1 SV=1	ARHGEF1
0	1.59163	0	1.2647	0	0.675565	0.0117606	0.677776	0	3	-1.1773	3.58333	1	0	>tr|E9PS18|E9PS18_HUMAN Delta(14)-sterol reductase (Fragment) OS=Homo sapiens GN=TM7SF2 PE=1 SV=1	TM7SF2
0	3.0613	2.38082	2.38082	3.22668	3.69658	0.320148	0.677776	2	3	-1.17707	36.7917	4	0	>tr|H0Y4L1|H0Y4L1_HUMAN Large proline-rich protein BAG6 (Fragment) OS=Homo sapiens GN=BAG6 PE=1 SV=1	BAG6
0	2.09217	0	0.949016	0.795859	1.2647	0.0535996	0.677776	1	3	-1.17001	6.41667	1	0	>tr|H0YE34|H0YE34_HUMAN Activating molecule in BECN1-regulated autophagy protein 1 (Fragment) OS=Homo sapiens GN=AMBRA1 PE=1 SV=1	AMBRA1
0	2.25214	0	2.078	2.08746	1.2647	0.198535	0.677776	1	3	-1.16913	11.75	2	0	>tr|F2Z303|F2Z303_HUMAN Uridine 5'-monophosphate synthase OS=Homo sapiens GN=UMPS PE=1 SV=1	UMPS
3.07682	3.69658	2.74595	3.11316	1.64706	4.16714	0.0915677	0.677776	3	3	-1.16902	53.5833	1	0	>sp|Q9Y2L1|RRP44_HUMAN Exosome complex exonuclease RRP44 OS=Homo sapiens GN=DIS3 PE=1 SV=2	DIS3
0	1.32193	0	2.77844	2.37697	1.77259	0.265848	0.677776	1	3	-1.16533	14.25	2	0	>sp|Q12851|M4K2_HUMAN Mitogen-activated protein kinase kinase kinase kinase 2 OS=Homo sapiens GN=MAP4K2 PE=1 SV=2	MAP4K2
1.80449	4.36389	0.0968615	1.37311	2.75192	2.38082	0.3805	0.687127	3	3	-1.15485	33.9583	2	0	>sp|O75122|CLAP2_HUMAN CLIP-associating protein 2 OS=Homo sapiens GN=CLASP2 PE=1 SV=2	CLASP2
1.2647	2.37697	0.133856	1.77259	2.08746	2.77844	0.146184	0.677776	3	3	-1.14733	17.3333	2	0	>sp|P54920|SNAA_HUMAN Alpha-soluble NSF attachment protein OS=Homo sapiens GN=NAPA PE=1 SV=3	NAPA
2.03953	3.33489	0	2.77844	1.32193	0.675565	0.319633	0.677776	2	3	-1.14248	20.0833	1	0	>tr|M0QZS0|M0QZS0_HUMAN Rho guanine nucleotide exchange factor 18 (Fragment) OS=Homo sapiens GN=ARHGEF18 PE=1 SV=1	ARHGEF18
0	2.09217	2.09217	1.77259	0.133856	1.77259	0.172017	0.677776	2	3	-1.13711	11.5	1	0	>sp|Q9UL15|BAG5_HUMAN BAG family molecular chaperone regulator 5 OS=Homo sapiens GN=BAG5 PE=1 SV=1	BAG5
2.73697	3.33489	0	3.08864	2.37697	2.078	0.296269	0.677776	2	3	-1.1292	29.75	1	0	>sp|Q14746|COG2_HUMAN Conserved oligomeric Golgi complex subunit 2 OS=Homo sapiens GN=COG2 PE=1 SV=1	COG2
2.5883	1.81307	0	2.078	0	2.078	0.263642	0.677776	1	3	-1.12693	13.4167	2	0	>tr|B1AKL4|B1AKL4_HUMAN Eukaryotic translation initiation factor 4E transporter OS=Homo sapiens GN=EIF4ENIF1 PE=1 SV=1	EIF4ENIF1
2.38082	3.0613	3.56394	3.28437	0	2.97982	0.344388	0.677776	2	3	-1.12691	36.375	3	0	>tr|F8VWQ0|F8VWQ0_HUMAN Phosphate carrier protein, mitochondrial OS=Homo sapiens GN=SLC25A3 PE=1 SV=1	SLC25A3
0	2.38082	2.09217	1.2647	0	1.77259	0.22255	0.677776	1	3	-1.10865	11.0833	1	0	>sp|O15371|EIF3D_HUMAN Eukaryotic translation initiation factor 3 subunit D OS=Homo sapiens GN=EIF3D PE=1 SV=1	EIF3D
1.28951	1.71882	0	3.03342	2.79586	2.65583	0.284707	0.677776	2	3	-1.10757	21.5	1	0	>sp|Q93084|AT2A3_HUMAN Sarcoplasmic/endoplasmic reticulum calcium ATPase 3 OS=Homo sapiens GN=ATP2A3 PE=1 SV=2	ATP2A3
2.79008	2.47393	0	1.53743	1.1247	3.17159	0.310326	0.677776	2	3	-1.0894	21.3333	1	0	>sp|P33176|KINH_HUMAN Kinesin-1 heavy chain OS=Homo sapiens GN=KIF5B PE=1 SV=1	KIF5B
2.85936	4.21621	0	2.20511	2.37697	2.078	0.387537	0.695925	2	3	-1.08766	35.2083	1	0	>sp|P55884|EIF3B_HUMAN Eukaryotic translation initiation factor 3 subunit B OS=Homo sapiens GN=EIF3B PE=1 SV=3	EIF3B
1.34577	2.37697	0	1.77259	1.32193	1.77259	0.0903938	0.677776	2	3	-1.08482	12.4167	1	0	>tr|A0A075B6R3|A0A075B6R3_HUMAN Probable helicase with zinc finger domain OS=Homo sapiens GN=HELZ PE=1 SV=1	HELZ
0	1.81307	1.09686	2.078	1.32193	1.77259	0.0613995	0.677776	2	3	-1.08162	11.1667	1	0	>sp|Q9Y4C2|TCAF1_HUMAN TRPM8 channel-associated factor 1 OS=Homo sapiens GN=TCAF1 PE=1 SV=3	TCAF1
3.50691	3.81378	0	3.05287	2.92019	2.77844	0.395421	0.707153	2	3	-1.07266	44.1667	1	0	>sp|Q8TAQ2|SMRC2_HUMAN SWI/SNF complex subunit SMARCC2 OS=Homo sapiens GN=SMARCC2 PE=1 SV=1	SMARCC2
2.98616	2.33787	0	3.23095	3.22668	3.85521	0.396136	0.707693	2	3	-1.0704	41.9583	1	0	>sp|Q15386|UBE3C_HUMAN Ubiquitin-protein ligase E3C OS=Homo sapiens GN=UBE3C PE=1 SV=3	UBE3C
0	1.71882	0	1.0199	0.795859	1.2647	0.0331997	0.677776	1	3	-1.06919	5.33333	1	0	>sp|Q96AX1|VP33A_HUMAN Vacuolar protein sorting-associated protein 33A OS=Homo sapiens GN=VPS33A PE=1 SV=1	VPS33A
0	1.71882	0	1.0199	0.795859	1.2647	0.0331997	0.677776	1	3	-1.06919	5.33333	2	0	>tr|H3BMM5|H3BMM5_HUMAN Uncharacterized protein OS=Homo sapiens PE=4 SV=1	>tr|H3BMM5|H3BMM5_HUMAN Uncharacterized protein OS=Homo sapiens PE=4 SV=1
0	2.56139	2.92811	1.77259	1.23947	3.04075	0.312405	0.677776	2	3	-1.06905	22.3333	1	0	>sp|O94776|MTA2_HUMAN Metastasis-associated protein MTA2 OS=Homo sapiens GN=MTA2 PE=1 SV=1	MTA2
1.81307	1.81307	1.76081	2.38082	0	2.58496	0.169879	0.677776	2	3	-1.06832	16.1667	1	0	>sp|Q9BVQ7|SPA5L_HUMAN Spermatogenesis-associated protein 5-like protein 1 OS=Homo sapiens GN=SPATA5L1 PE=1 SV=2	SPATA5L1
1.0199	1.81307	0	1.2647	0.133856	1.2647	0.0448226	0.677776	2	3	-1.06291	6.41667	3	0	>tr|E5RFC6|E5RFC6_HUMAN Clathrin coat assembly protein AP180 (Fragment) OS=Homo sapiens GN=SNAP91 PE=1 SV=1	SNAP91
3.90355	1.99749	0	3.659	1.95161	3.33985	0.444799	0.755829	2	3	-1.04706	41.1667	2	0	>tr|H0YEH2|H0YEH2_HUMAN Pumilio homolog 1 (Fragment) OS=Homo sapiens GN=PUM1 PE=1 SV=1	PUM1
4.23894	3.79874	4.05106	3.93402	0	3.69658	0.491801	0.786167	2	3	-1.04645	69.375	1	0	>tr|A0A087WV01|A0A087WV01_HUMAN Elongation factor 1-alpha OS=Homo sapiens GN=EEF1A1 PE=1 SV=1	EEF1A1
2.5883	2.38082	0	2.38082	0	0.949016	0.350693	0.677776	1	3	-1.04079	14.0833	3	0	>tr|A0A087WYY0|A0A087WYY0_HUMAN TAR DNA-binding protein 43 OS=Homo sapiens GN=TARDBP PE=1 SV=1	TARDBP
0	0.874469	1.09686	1.2647	0	2.078	0.110649	0.677776	1	3	-1.0401	6.33333	1	0	>sp|Q9Y2T2|AP3M1_HUMAN AP-3 complex subunit mu-1 OS=Homo sapiens GN=AP3M1 PE=1 SV=1	AP3M1
1.34577	1.81307	0	2.38082	1.80735	2.078	0.14035	0.677776	2	3	-1.03959	14.0833	1	0	>sp|Q63ZY3|KANK2_HUMAN KN motif and ankyrin repeat domain-containing protein 2 OS=Homo sapiens GN=KANK2 PE=1 SV=1	KANK2
0	1.81307	1.76081	2.078	0.795859	1.77259	0.11621	0.677776	2	3	-1.03566	11.3333	2	0	>tr|C9JSR1|C9JSR1_HUMAN Myotubularin-related protein 14 OS=Homo sapiens GN=MTMR14 PE=1 SV=1	MTMR14
0	2.25214	2.58162	1.84688	0.795859	2.38082	0.255584	0.677776	2	3	-1.03412	15.75	2	0	>sp|O14579|COPE_HUMAN Coatomer subunit epsilon OS=Homo sapiens GN=COPE PE=1 SV=3	COPE
3.84444	3.66415	2.5883	4.13328	0.429988	2.16323	0.423901	0.732022	3	3	-1.03265	50.875	1	0	>sp|O15164|TIF1A_HUMAN Transcription intermediary factor 1-alpha OS=Homo sapiens GN=TRIM24 PE=1 SV=3	TRIM24
0	1.13386	1.76081	1.77259	0.133856	2.078	0.17776	0.677776	2	3	-1.02993	9.25	3	0	>tr|B0QYT5|B0QYT5_HUMAN Ran GTPase-activating protein 1 (Fragment) OS=Homo sapiens GN=RANGAP1 PE=1 SV=1	RANGAP1
0	1.32193	0.481127	1.77259	0.795859	1.2647	0.0218223	0.677776	2	3	-1.02741	6.75	2	0	>tr|C9J7M8|C9J7M8_HUMAN Transcription initiation factor TFIID subunit 8 OS=Homo sapiens GN=TAF8 PE=1 SV=1	TAF8
0	1.71882	2.09217	0.949016	0	2.49541	0.28398	0.677776	1	3	-1.02369	10.25	2	0	>tr|C9JXZ7|C9JXZ7_HUMAN Replication factor C subunit 4 (Fragment) OS=Homo sapiens GN=RFC4 PE=1 SV=1	RFC4
0	1.32193	0	1.2647	0.795859	1.2647	0.0186288	0.677776	1	3	-1.01849	5.33333	1	0	>sp|Q9NVW2|RNF12_HUMAN E3 ubiquitin-protein ligase RLIM OS=Homo sapiens GN=RLIM PE=1 SV=3	RLIM
0.736966	2.76965	2.09217	2.58496	2.08746	2.58496	0.0912211	0.677776	3	3	-1.00766	23.25	3	0	>tr|K7EQP4|K7EQP4_HUMAN Very long-chain-specific acyl-CoA dehydrogenase, mitochondrial (Fragment) OS=Homo sapiens GN=ACADVL PE=1 SV=6	ACADVL
3.39279	3.42019	2.54088	2.86762	0	2.65583	0.391049	0.701009	2	3	-1.00332	34.4167	1	0	>sp|Q7Z7L1|SLN11_HUMAN Schlafen family member 11 OS=Homo sapiens GN=SLFN11 PE=1 SV=2	SLFN11
4.22561	3.558	0	3.98363	2.08746	1.77259	0.513027	0.804404	2	3	-1.00038	49.25	1	0	>sp|Q68EM7|RHG17_HUMAN Rho GTPase-activating protein 17 OS=Homo sapiens GN=ARHGAP17 PE=1 SV=1	ARHGAP17
2.09217	0	0.481127	1.2647	2.37697	0.675565	0.221875	0.677776	3	2	1.00333	10.25	1	0	>tr|H0YA26|H0YA26_HUMAN Pantothenate kinase 4 (Fragment) OS=Homo sapiens GN=PANK4 PE=1 SV=1	PANK4
3.88671	3.73546	3.70506	3.40939	2.58162	0	0.46867	0.770391	3	2	1.00951	53	2	0	>sp|P18858|DNLI1_HUMAN DNA ligase 1 OS=Homo sapiens GN=LIG1 PE=1 SV=1	LIG1
2.09217	0	2.38082	2.58496	3.22668	2.078	0.304921	0.677776	3	2	1.01224	24.5	1	0	>sp|Q96DF8|DGC14_HUMAN Protein DGCR14 OS=Homo sapiens GN=DGCR14 PE=1 SV=1	DGCR14
2.47032	2.30986	3.40939	2.90689	2.37697	0	0.344294	0.677776	3	2	1.01331	27.4167	2	0	>sp|Q9UJV9|DDX41_HUMAN Probable ATP-dependent RNA helicase DDX41 OS=Homo sapiens GN=DDX41 PE=1 SV=2	DDX41
1.34577	0	1.09686	1.77259	2.37697	0	0.225262	0.677776	3	1	1.01567	9.83333	1	0	>sp|P09874|PARP1_HUMAN Poly [ADP-ribose] polymerase 1 OS=Homo sapiens GN=PARP1 PE=1 SV=4	PARP1
2.80162	1.71882	2.74595	2.70582	1.93336	0	0.291378	0.677776	3	2	1.01876	22.0833	2	0	>tr|E7ESI2|E7ESI2_HUMAN Cyclin-dependent kinase 2 OS=Homo sapiens GN=CDK2 PE=1 SV=1	CDK2
1.81307	0	0.133856	1.2647	2.37697	0	0.268741	0.677776	3	1	1.01973	8.83333	2	0	>tr|A0A0G2JMR0|A0A0G2JMR0_HUMAN HLA class II histocompatibility antigen, DR beta 3 chain OS=Homo sapiens GN=HLA-DRB3 PE=1 SV=1	HLA-DRB3
1.81307	0	0.133856	1.2647	2.37697	0	0.268741	0.677776	3	1	1.01973	8.83333	2	0	>tr|A0A0G2JMS9|A0A0G2JMS9_HUMAN HLA class II histocompatibility antigen, DRB1-16 beta chain OS=Homo sapiens GN=HLA-DRB1 PE=1 SV=1	HLA-DRB1
1.0199	0.874469	2.38082	1.2647	1.80735	0	0.132957	0.677776	3	2	1.02297	10.0833	1	0	>tr|H7C2B5|H7C2B5_HUMAN Telomere-associated protein RIF1 (Fragment) OS=Homo sapiens GN=RIF1 PE=1 SV=1	RIF1
1.28951	0	0.481127	0	1.32193	0	0.0199774	0.677776	3	0	1.03085	3.66667	1	0	>sp|O95292|VAPB_HUMAN Vesicle-associated membrane protein-associated protein B/C OS=Homo sapiens GN=VAPB PE=1 SV=3	VAPB
1.0199	0.874469	3.21917	1.77259	1.80735	0.305808	0.252643	0.677776	3	3	1.03119	15	1	0	>sp|P41240|CSK_HUMAN Tyrosine-protein kinase CSK OS=Homo sapiens GN=CSK PE=1 SV=1	CSK
2.90823	1.09686	3.95613	3.11316	3.74446	3.27922	0.248692	0.677776	3	3	1.03986	49	3	0	>tr|A0A087WUL9|A0A087WUL9_HUMAN 26S proteasome non-ATPase regulatory subunit 13 OS=Homo sapiens GN=PSMD13 PE=1 SV=1	PSMD13
2.79442	2.8216	2.58162	0	0.584963	0	0.42334	0.732022	3	1	1.04647	18	1	0	>sp|Q7Z5L9|I2BP2_HUMAN Interferon regulatory factor 2-binding protein 2 OS=Homo sapiens GN=IRF2BP2 PE=1 SV=2	IRF2BP2
2.5883	0	2.58162	2.48113	3.07682	2.58496	0.285458	0.677776	3	2	1.06021	27.4167	1	0	>sp|Q9NYY8|FAKD2_HUMAN FAST kinase domain-containing protein 2 OS=Homo sapiens GN=FASTKD2 PE=1 SV=1	FASTKD2
1.76671	2.09217	2.09217	0	2.37697	0.949016	0.166231	0.677776	3	2	1.06489	14.0833	2	0	>tr|K7EJL9|K7EJL9_HUMAN Septin-9 OS=Homo sapiens GN=SEPT9 PE=1 SV=1	40057
1.76081	0	2.58162	0	0.133856	1.2647	0.268451	0.677776	3	1	1.07053	8.33333	1	0	>sp|P20794|MAK_HUMAN Serine/threonine-protein kinase MAK OS=Homo sapiens GN=MAK PE=1 SV=2	MAK
2.76965	1.76671	2.09217	0	0.795859	0.675565	0.238722	0.677776	3	2	1.0718	12.8333	3	0	>tr|H3BR89|H3BR89_HUMAN CCR4-NOT transcription complex subunit 1 (Fragment) OS=Homo sapiens GN=CNOT1 PE=1 SV=1	CNOT1
0.760812	0	3.56394	2.91488	1.80735	0	0.445977	0.756549	3	1	1.07241	19.75	1	0	>sp|O95140|MFN2_HUMAN Mitofusin-2 OS=Homo sapiens GN=MFN2 PE=1 SV=3	MFN2
2.08746	1.71882	2.90288	2.1247	2.08746	0	0.201284	0.677776	3	2	1.0781	18.3333	3	0	>tr|F8VZ52|F8VZ52_HUMAN Dynamin-1-like protein (Fragment) OS=Homo sapiens GN=DNM1L PE=1 SV=1	DNM1L
1.34577	0	1.09686	0	0.795859	0	0.00245669	0.677776	3	0	1.0795	3.75	1	0	>sp|O75695|XRP2_HUMAN Protein XRP2 OS=Homo sapiens GN=RP2 PE=1 SV=4	RP2
2.09217	0	2.74595	2.38082	0.795859	0	0.330077	0.677776	3	1	1.08439	13.75	1	0	>sp|O15091|MRRP3_HUMAN Mitochondrial ribonuclease P protein 3 OS=Homo sapiens GN=KIAA0391 PE=1 SV=2	KIAA0391
1.34577	0	2.38082	1.2647	0.795859	0	0.158517	0.677776	3	1	1.08592	8.16667	1	0	>sp|Q9Y6G9|DC1L1_HUMAN Cytoplasmic dynein 1 light intermediate chain 1 OS=Homo sapiens GN=DYNC1LI1 PE=1 SV=3	DYNC1LI1
1.34577	0	2.38082	1.2647	0.795859	0	0.158517	0.677776	3	1	1.08592	8.16667	1	0	>tr|E9PHH9|E9PHH9_HUMAN DNA-directed RNA polymerase III subunit RPC3 OS=Homo sapiens GN=POLR3C PE=1 SV=1	POLR3C
1.0199	0	1.76081	0.688056	1.16993	0	0.0278785	0.677776	3	1	1.08753	5.41667	2	0	>tr|E9PFF2|E9PFF2_HUMAN Transketolase OS=Homo sapiens GN=TKT PE=1 SV=1	TKT
2.03953	0	1.89616	0.399931	1.32193	1.57154	0.102906	0.677776	3	2	1.09538	9.83333	3	0	>tr|R4GN69|R4GN69_HUMAN Heat shock protein 105 kDa OS=Homo sapiens GN=HSPH1 PE=1 SV=1	HSPH1
3.08864	2.8216	3.63017	0	3.20945	3.79478	0.391332	0.701213	3	2	1.10396	45.4167	1	0	>tr|X6R5E5|X6R5E5_HUMAN Ubiquitin-associated domain-containing protein 2 (Fragment) OS=Homo sapiens GN=UBAC2 PE=1 SV=1	UBAC2
1.34577	0.874469	0.481127	0	2.37697	0	0.148293	0.677776	3	1	1.1098	7.33333	3	0	>tr|F5GZT7|F5GZT7_HUMAN Protoporphyrinogen oxidase OS=Homo sapiens GN=PPOX PE=1 SV=1	PPOX
1.77844	1.75489	2.19202	0	1.13386	0	0.166493	0.677776	3	1	1.11648	8.91667	2	0	>tr|K7EJP1|K7EJP1_HUMAN ATP synthase subunit alpha, mitochondrial (Fragment) OS=Homo sapiens GN=ATP5A1 PE=1 SV=6	ATP5A1
1.34577	1.81307	3.01557	1.2647	2.08746	0	0.194689	0.677776	3	2	1.12368	15.9167	1	0	>sp|Q8NB90|SPAT5_HUMAN Spermatogenesis-associated protein 5 OS=Homo sapiens GN=SPATA5 PE=1 SV=3	SPATA5
2.42999	0	1.44478	0	2.08746	2.58496	0.283149	0.677776	3	1	1.12576	15.0833	1	0	>sp|O94921|CDK14_HUMAN Cyclin-dependent kinase 14 OS=Homo sapiens GN=CDK14 PE=1 SV=3	CDK14
1.2647	0	2.09217	1.77259	1.80735	0	0.15146	0.677776	3	1	1.13055	9.5	2	0	>sp|O75390|CISY_HUMAN Citrate synthase, mitochondrial OS=Homo sapiens GN=CS PE=1 SV=2	CS
1.0199	0	2.38082	0	2.08746	2.078	0.231598	0.677776	3	1	1.13673	12.0833	1	0	>sp|Q9UBX3|DIC_HUMAN Mitochondrial dicarboxylate carrier OS=Homo sapiens GN=SLC25A10 PE=1 SV=2	SLC25A10
1.0199	0	1.76081	0	1.32193	0.675565	0.0214223	0.677776	3	1	1.14236	5.83333	2	0	>sp|Q9NYK5|RM39_HUMAN 39S ribosomal protein L39, mitochondrial OS=Homo sapiens GN=MRPL39 PE=1 SV=3	MRPL39
2.5883	0	1.09686	1.2647	1.32193	0.305808	0.129108	0.677776	3	2	1.14553	9.91667	2	0	>sp|P17706|PTN2_HUMAN Tyrosine-protein phosphatase non-receptor type 2 OS=Homo sapiens GN=PTPN2 PE=1 SV=2	PTPN2
5.30365	4.45167	3.1247	4.53636	4.01371	0	0.518037	0.808285	3	2	1.15135	100.958	1	0	>sp|P49792|RBP2_HUMAN E3 SUMO-protein ligase RanBP2 OS=Homo sapiens GN=RANBP2 PE=1 SV=2	RANBP2
3.22132	3.12009	2.74595	0	3.88671	3.27922	0.361065	0.677776	3	2	1.15156	45.3333	1	0	>sp|Q05086|UBE3A_HUMAN Ubiquitin-protein ligase E3A OS=Homo sapiens GN=UBE3A PE=1 SV=4	UBE3A
2.078	2.03953	3.56394	1.8635	3.64546	1.91754	0.087004	0.677776	3	3	1.15561	33.25	2	0	>tr|A6PVX3|A6PVX3_HUMAN 26S proteasome non-ATPase regulatory subunit 4 (Fragment) OS=Homo sapiens GN=PSMD4 PE=1 SV=1	PSMD4
2.38082	2.76965	2.74595	0	2.37697	1.2647	0.226469	0.677776	3	2	1.15646	21.5	1	0	>sp|Q9H3F6|BACD3_HUMAN BTB/POZ domain-containing adapter for CUL3-mediated RhoA degradation protein 3 OS=Homo sapiens GN=KCTD10 PE=1 SV=1	KCTD10
1.81307	0.874469	2.74595	2.58496	2.37697	0	0.22393	0.677776	3	2	1.15885	18.1667	2	0	>tr|G3V1N2|G3V1N2_HUMAN HCG1745306, isoform CRA_a OS=Homo sapiens GN=HBA2 PE=1 SV=1	HBA2
2.47032	0	3.4667	3.04075	2.37697	1.77259	0.285904	0.677776	3	2	1.16688	27.3333	1	0	>sp|Q8IXI2|MIRO1_HUMAN Mitochondrial Rho GTPase 1 OS=Homo sapiens GN=RHOT1 PE=1 SV=2	RHOT1
1.27302	0	1.09686	0	1.80735	0.675565	0.0197656	0.677776	3	1	1.16722	5.75	1	0	>sp|Q9NV70|EXOC1_HUMAN Exocyst complex component 1 OS=Homo sapiens GN=EXOC1 PE=1 SV=4	EXOC1
5.80413	4.50206	3.54174	0	3.69658	5.03189	0.541678	0.824796	3	2	1.1695	125.333	1	0	>tr|E9PN89|E9PN89_HUMAN Heat shock cognate 71 kDa protein (Fragment) OS=Homo sapiens GN=HSPA8 PE=1 SV=1	HSPA8
3.15763	0	2.92811	2.91488	4.23894	3.88671	0.395765	0.707415	3	2	1.17436	53.75	1	0	>sp|P62191|PRS4_HUMAN 26S protease regulatory subunit 4 OS=Homo sapiens GN=PSMC1 PE=1 SV=1	PSMC1
1.34577	0	1.09686	1.2647	2.37697	0	0.108601	0.677776	3	1	1.18497	8.83333	2	0	>sp|P42765|THIM_HUMAN 3-ketoacyl-CoA thiolase, mitochondrial OS=Homo sapiens GN=ACAA2 PE=1 SV=2	ACAA2
2.09217	2.05889	1.44478	0.5025	2.58162	0	0.166372	0.677776	3	2	1.18573	14.25	1	0	>tr|E5RGA2|E5RGA2_HUMAN Eukaryotic translation initiation factor 3 subunit E OS=Homo sapiens GN=EIF3E PE=1 SV=1	EIF3E
3.87036	2.6989	4.38274	2.10154	4.51548	4.39327	0.170448	0.677776	3	3	1.19163	86.9583	2	0	>tr|J3KN16|J3KN16_HUMAN Proteasome-associated protein ECM29 homolog OS=Homo sapiens GN=KIAA0368 PE=1 SV=1	KIAA0368
3.22132	2.55459	3.21917	1.5025	1.22239	0	0.294207	0.677776	3	2	1.20193	24.4167	1	0	>sp|Q9Y263|PLAP_HUMAN Phospholipase A-2-activating protein OS=Homo sapiens GN=PLAA PE=1 SV=2	PLAA
1.2647	0	1.81307	0	2.92019	2.38082	0.265013	0.677776	3	1	1.20571	14.9167	3	0	>tr|D6R9K7|D6R9K7_HUMAN RNA-binding protein 4 OS=Homo sapiens GN=RBM4 PE=1 SV=1	RBM4
1.2647	0	1.81307	0	2.92019	2.38082	0.265013	0.677776	3	1	1.20571	14.9167	3	0	>tr|E9PLB0|E9PLB0_HUMAN RNA-binding protein 4B OS=Homo sapiens GN=RBM4B PE=1 SV=1	RBM4B
1.66297	0	1.44478	1.57154	2.08746	0	0.0958775	0.677776	3	1	1.20789	9.58333	2	0	>tr|Q5TBH6|Q5TBH6_HUMAN Dihydroxyacetone phosphate acyltransferase (Fragment) OS=Homo sapiens GN=GNPAT PE=1 SV=1	GNPAT
0.399931	0	2.09217	0	1.80735	0.675565	0.101227	0.677776	3	1	1.20796	7	2	0	>sp|Q5JTV8|TOIP1_HUMAN Torsin-1A-interacting protein 1 OS=Homo sapiens GN=TOR1AIP1 PE=1 SV=2	TOR1AIP1
1.66297	1.74894	2.8216	1.57827	2.47032	0	0.138108	0.677776	3	2	1.20923	16.9167	1	0	>sp|P04843|RPN1_HUMAN Dolichyl-diphosphooligosaccharide--protein glycosyltransferase subunit 1 OS=Homo sapiens GN=RPN1 PE=1 SV=1	RPN1
1.81307	1.32193	2.38082	0	0.795859	0	0.128532	0.677776	3	1	1.22261	9.08333	1	0	>sp|Q8NBU5|ATAD1_HUMAN ATPase family AAA domain-containing protein 1 OS=Homo sapiens GN=ATAD1 PE=1 SV=1	ATAD1
2.20511	0	1.89616	0.949016	1.80735	1.2647	0.0366051	0.677776	3	2	1.23164	11.0833	1	0	>sp|Q58A45|PAN3_HUMAN PAB-dependent poly(A)-specific ribonuclease subunit PAN3 OS=Homo sapiens GN=PAN3 PE=1 SV=3	PAN3
2.49541	0	1.76081	0.688056	0.133856	0	0.168235	0.677776	3	1	1.23401	7.75	1	0	>tr|F5H2B5|F5H2B5_HUMAN Phospholipase D4 OS=Homo sapiens GN=PLD4 PE=1 SV=1	PLD4
2.42999	0.584963	4.17298	2.90689	4.08805	3.47933	0.303546	0.677776	3	3	1.23995	53.8333	1	0	>sp|Q86VS8|HOOK3_HUMAN Protein Hook homolog 3 OS=Homo sapiens GN=HOOK3 PE=1 SV=2	HOOK3
1.2647	0	3.40939	1.0199	2.84688	2.77844	0.296617	0.677776	3	2	1.24088	23.5	1	0	>sp|P28066|PSA5_HUMAN Proteasome subunit alpha type-5 OS=Homo sapiens GN=PSMA5 PE=1 SV=3	PSMA5
1.34577	0	2.38082	2.078	2.08746	0	0.175764	0.677776	3	1	1.24535	12.75	2	0	>sp|O95870|ABHGA_HUMAN Abhydrolase domain-containing protein 16A OS=Homo sapiens GN=ABHD16A PE=1 SV=3	ABHD16A
2.5883	0	1.09686	0	1.32193	1.2647	0.117534	0.677776	3	1	1.24746	9.5	1	0	>sp|Q16186|ADRM1_HUMAN Proteasomal ubiquitin receptor ADRM1 OS=Homo sapiens GN=ADRM1 PE=1 SV=2	ADRM1
1.34577	0	1.09686	1.2647	2.58162	0	0.114719	0.677776	3	1	1.25318	9.75	1	0	>sp|P34932|HSP74_HUMAN Heat shock 70 kDa protein 4 OS=Homo sapiens GN=HSPA4 PE=1 SV=4	HSPA4
0.736966	0	3.01557	2.73697	2.75192	0	0.34061	0.677776	3	1	1.25583	19.1667	1	0	>sp|Q969V3|NCLN_HUMAN Nicalin OS=Homo sapiens GN=NCLN PE=1 SV=2	NCLN
3.07682	1.71882	2.94642	0	2.75192	3.27922	0.256414	0.677776	3	2	1.25904	30.5	1	0	>sp|Q9Y6C9|MTCH2_HUMAN Mitochondrial carrier homolog 2 OS=Homo sapiens GN=MTCH2 PE=1 SV=1	MTCH2
4.04044	3.88976	3.80018	0	3.28746	3.44386	0.368473	0.677776	3	2	1.26482	60.2917	2	0	>sp|P08195|4F2_HUMAN 4F2 cell-surface antigen heavy chain OS=Homo sapiens GN=SLC3A2 PE=1 SV=3	SLC3A2
0.399931	0	2.09217	0	1.32193	0	0.0601099	0.677776	3	0	1.27134	5.5	3	0	>tr|G8JLA1|G8JLA1_HUMAN Retinol dehydrogenase 13 OS=Homo sapiens GN=RDH13 PE=1 SV=1	RDH13
2.90823	0	1.81307	0	2.08746	2.97982	0.289547	0.677776	3	1	1.27631	19.5833	1	0	>sp|Q9NTX5|ECHD1_HUMAN Ethylmalonyl-CoA decarboxylase OS=Homo sapiens GN=ECHDC1 PE=1 SV=2	ECHDC1
1.81307	0	1.76081	0	2.92019	2.65583	0.254559	0.677776	3	1	1.27941	17.25	1	0	>sp|P22570|ADRO_HUMAN NADPH:adrenodoxin oxidoreductase, mitochondrial OS=Homo sapiens GN=FDXR PE=1 SV=3	FDXR
1.77259	0	0.0968615	0	1.97473	0	0.0976395	0.677776	3	0	1.28139	5.83333	1	0	>sp|Q99536|VAT1_HUMAN Synaptic vesicle membrane protein VAT-1 homolog OS=Homo sapiens GN=VAT1 PE=1 SV=2	VAT1
3.84444	3.17659	4.96482	3.85487	4.23894	2.16323	0.0954292	0.677776	3	3	1.2845	86.3333	2	0	>sp|P61011|SRP54_HUMAN Signal recognition particle 54 kDa protein OS=Homo sapiens GN=SRP54 PE=1 SV=1	SRP54
3.61839	2.29972	4.0625	2.1247	2.37697	1.77259	0.0712904	0.677776	3	3	1.28695	39.1667	1	0	>sp|Q9NTJ5|SAC1_HUMAN Phosphatidylinositide phosphatase SAC1 OS=Homo sapiens GN=SACM1L PE=1 SV=2	SACM1L
1.0199	0	1.09686	0	1.80735	0	0.0064332	0.677776	3	0	1.30804	5	2	0	>sp|P13929|ENOB_HUMAN Beta-enolase OS=Homo sapiens GN=ENO3 PE=1 SV=5	ENO3
1.34577	0	2.8216	0	2.92019	3.14975	0.323566	0.677776	3	1	1.3126	22.3333	2	0	>sp|P25787|PSA2_HUMAN Proteasome subunit alpha type-2 OS=Homo sapiens GN=PSMA2 PE=1 SV=2	PSMA2
0.399931	0	1.76081	0	2.08746	0.305808	0.0671235	0.677776	3	1	1.31413	7	2	0	>tr|F5H052|F5H052_HUMAN Armadillo repeat-containing protein 6 (Fragment) OS=Homo sapiens GN=ARMC6 PE=1 SV=1	ARMC6
2.03953	0	2.38082	0	0.795859	1.2647	0.108714	0.677776	3	1	1.31717	9.25	4	0	>tr|A0A0C4DFQ1|A0A0C4DFQ1_HUMAN Metaxin-1 OS=Homo sapiens GN=MTX1 PE=1 SV=1	MTX1
1.81307	0	2.09217	1.2647	1.32193	0	0.0506577	0.677776	3	1	1.32082	9.08333	1	0	>sp|P49643|PRI2_HUMAN DNA primase large subunit OS=Homo sapiens GN=PRIM2 PE=1 SV=2	PRIM2
1.27302	0	3.01557	1.44846	1.1247	0	0.16362	0.677776	3	1	1.32161	10.5	2	0	>tr|F5GXY2|F5GXY2_HUMAN L-lactate dehydrogenase A chain (Fragment) OS=Homo sapiens GN=LDHA PE=1 SV=6	LDHA
2.90823	2.38082	3.21917	0	3.31389	3.078	0.230669	0.677776	3	2	1.32749	35.75	1	0	>sp|P51665|PSMD7_HUMAN 26S proteasome non-ATPase regulatory subunit 7 OS=Homo sapiens GN=PSMD7 PE=1 SV=2	PSMD7
1.81307	0	2.74595	0	1.80735	2.38082	0.194231	0.677776	3	1	1.32852	15	1	0	>sp|Q9UHQ9|NB5R1_HUMAN NADH-cytochrome b5 reductase 1 OS=Homo sapiens GN=CYB5R1 PE=1 SV=1	CYB5R1
1.71882	0	3.01557	1.53743	0.795859	0	0.181091	0.677776	3	1	1.33094	11.4167	2	0	>sp|Q9NZN8|CNOT2_HUMAN CCR4-NOT transcription complex subunit 2 OS=Homo sapiens GN=CNOT2 PE=1 SV=1	CNOT2
1.0199	0.874469	1.76081	0	2.08746	0	0.0363088	0.677776	3	1	1.33124	7.83333	1	0	>tr|A0A087WXB0|A0A087WXB0_HUMAN Secretory carrier-associated membrane protein 1 OS=Homo sapiens GN=SCAMP1 PE=1 SV=1	SCAMP1
3.17714	0	2.74595	2.1247	3.07682	2.86212	0.198055	0.677776	3	2	1.3377	31.25	2	0	>tr|J3QSA9|J3QSA9_HUMAN 26S protease regulatory subunit 8 (Fragment) OS=Homo sapiens GN=PSMC5 PE=1 SV=1	PSMC5
0.760812	0	3.4667	1.02975	3.22668	2.38082	0.289879	0.677776	3	2	1.34787	24.1667	1	0	>sp|P51398|RT29_HUMAN 28S ribosomal protein S29, mitochondrial OS=Homo sapiens GN=DAP3 PE=1 SV=1	DAP3
2.74745	0	2.09217	2.58496	1.80735	0	0.209151	0.677776	3	1	1.354	16.5	1	0	>sp|Q9BVI4|NOC4L_HUMAN Nucleolar complex protein 4 homolog OS=Homo sapiens GN=NOC4L PE=1 SV=1	NOC4L
3.33191	0	3.68026	3.63178	2.14296	1.45578	0.304944	0.677776	3	2	1.35585	36.5833	2	0	>sp|Q12905|ILF2_HUMAN Interleukin enhancer-binding factor 2 OS=Homo sapiens GN=ILF2 PE=1 SV=2	ILF2
0.399931	0	2.38082	0	1.32193	0	0.0751978	0.677776	3	0	1.36756	6.5	1	0	>sp|Q9UGP8|SEC63_HUMAN Translocation protein SEC63 homolog OS=Homo sapiens GN=SEC63 PE=1 SV=2	SEC63
1.71882	0	1.33787	1.0199	2.08746	0	0.0269944	0.677776	3	1	1.37475	8.08333	1	0	>sp|P78406|RAE1L_HUMAN mRNA export factor OS=Homo sapiens GN=RAE1 PE=1 SV=1	RAE1
3.25214	0	3.14579	2.68338	4.40656	3.98363	0.328511	0.677776	3	2	1.37916	58.7083	2	0	>tr|F5H2F4|F5H2F4_HUMAN C-1-tetrahydrofolate synthase, cytoplasmic OS=Homo sapiens GN=MTHFD1 PE=1 SV=1	MTHFD1
3.09803	0	3.88671	1.37311	2.152	3.60363	0.299261	0.677776	3	2	1.38667	36.1667	1	0	>sp|P22830|HEMH_HUMAN Ferrochelatase, mitochondrial OS=Homo sapiens GN=FECH PE=1 SV=2	FECH
4.61266	0	6.52737	5.32268	3.1777	4.81271	0.514896	0.805534	3	2	1.39411	191.875	1	0	>sp|P12236|ADT3_HUMAN ADP/ATP translocase 3 OS=Homo sapiens GN=SLC25A6 PE=1 SV=4	SLC25A6
1.76671	0	1.33787	0	2.37697	1.2647	0.0534214	0.677776	3	1	1.40562	9.41667	2	0	>tr|K7ELV5|K7ELV5_HUMAN Cyclin-dependent kinase 3 (Fragment) OS=Homo sapiens GN=CDK3 PE=4 SV=6	CDK3
1.81307	0	1.09686	1.2647	2.58162	0	0.0790874	0.677776	3	1	1.40895	10.6667	1	0	>sp|P30101|PDIA3_HUMAN Protein disulfide-isomerase A3 OS=Homo sapiens GN=PDIA3 PE=1 SV=4	PDIA3
1.81307	0	1.09686	0	1.32193	0	0.00262398	0.677776	3	0	1.41062	5.66667	1	0	>sp|O75874|IDHC_HUMAN Isocitrate dehydrogenase [NADP] cytoplasmic OS=Homo sapiens GN=IDH1 PE=1 SV=2	IDH1
1.81307	2.58162	3.21917	0	1.80735	0	0.221248	0.677776	3	1	1.41932	18	1	0	>sp|Q96CU9|FXRD1_HUMAN FAD-dependent oxidoreductase domain-containing protein 1 OS=Homo sapiens GN=FOXRED1 PE=1 SV=2	FOXRED1
1.34577	0	2.38082	0.688056	2.75192	1.51658	0.0789874	0.677776	3	2	1.42463	14.9167	1	0	>sp|P38117|ETFB_HUMAN Electron transfer flavoprotein subunit beta OS=Homo sapiens GN=ETFB PE=1 SV=3	ETFB
2.02729	0.624491	2.86212	0.459432	0.530515	0	0.110467	0.677776	3	2	1.44533	9.45833	1	0	>tr|H0Y7K8|H0Y7K8_HUMAN Structural maintenance of chromosomes protein 1A (Fragment) OS=Homo sapiens GN=SMC1A PE=1 SV=2	SMC1A
1.77844	1.20511	2.25214	0	2.78718	1.2647	0.0453727	0.677776	3	2	1.44931	15.0833	1	0	>sp|Q96CS3|FAF2_HUMAN FAS-associated factor 2 OS=Homo sapiens GN=FAF2 PE=1 SV=2	FAF2
3.93795	2.57154	4.57386	1.59163	4.51548	4.49918	0.172773	0.677776	3	3	1.45498	89.2917	1	0	>sp|Q5VYK3|ECM29_HUMAN Proteasome-associated protein ECM29 homolog OS=Homo sapiens GN=ECM29 PE=1 SV=2	ECM29
3.26105	2.53916	2.54088	0	2.61471	1.50956	0.132368	0.677776	3	2	1.45598	25.5417	1	0	>sp|P04220|MUCB_HUMAN Ig mu heavy chain disease protein OS=Homo sapiens PE=1 SV=1	>sp|P04220|MUCB_HUMAN Ig mu heavy chain disease protein OS=Homo sapiens PE=1 SV=1
5.96867	5.23122	5.23122	5.96867	4.36923	0	0.493472	0.787952	3	2	1.45641	219.958	1	0	>sp|Q14204|DYHC1_HUMAN Cytoplasmic dynein 1 heavy chain 1 OS=Homo sapiens GN=DYNC1H1 PE=1 SV=5	DYNC1H1
3.07682	2.37697	1.32992	0	2.37697	0	0.193533	0.677776	3	1	1.46891	17.4167	3	0	>tr|C9J0E9|C9J0E9_HUMAN 26S proteasome non-ATPase regulatory subunit 6 (Fragment) OS=Homo sapiens GN=PSMD6 PE=1 SV=1	PSMD6
1.0199	0	2.90288	1.2647	1.80735	0	0.0971239	0.677776	3	1	1.48848	11.1667	2	0	>tr|A0A087X0Z7|A0A087X0Z7_HUMAN Dehydrogenase/reductase SDR family member 7 OS=Homo sapiens GN=DHRS7 PE=1 SV=1	DHRS7
3.02483	0	1.76081	2.38082	2.08746	0	0.163814	0.677776	3	1	1.49743	17.5	2	0	>sp|O43399|TPD54_HUMAN Tumor protein D54 OS=Homo sapiens GN=TPD52L2 PE=1 SV=2	TPD52L2
0.399931	0	1.76081	0	2.37697	0	0.0607006	0.677776	3	0	1.51257	7.33333	3	0	>tr|K7EL89|K7EL89_HUMAN Spermidine synthase (Fragment) OS=Homo sapiens GN=SRM PE=1 SV=1	SRM
1.34577	0.874469	2.74595	0	1.32193	0	0.0522979	0.677776	3	1	1.51306	9.75	1	0	>sp|Q9HDC9|APMAP_HUMAN Adipocyte plasma membrane-associated protein OS=Homo sapiens GN=APMAP PE=1 SV=2	APMAP
1.76081	0	1.09686	0.688056	2.37697	0	0.02526	0.677776	3	1	1.51553	8.41667	2	0	>tr|J3QSB4|J3QSB4_HUMAN 60S ribosomal protein L13 (Fragment) OS=Homo sapiens GN=RPL13 PE=1 SV=1	RPL13
2.06369	0	2.38082	0.688056	0.795859	0	0.0472371	0.677776	3	1	1.51744	8.58333	1	0	>sp|Q9UKX7|NUP50_HUMAN Nuclear pore complex protein Nup50 OS=Homo sapiens GN=NUP50 PE=1 SV=2	NUP50
2.66455	0	3.11316	0	1.93336	3.06728	0.224609	0.677776	3	1	1.54793	22.75	1	0	>sp|P25685|DNJB1_HUMAN DnaJ homolog subfamily B member 1 OS=Homo sapiens GN=DNAJB1 PE=1 SV=4	DNAJB1
0.736966	0	1.33787	0	2.58162	0	0.0460436	0.677776	3	0	1.55215	7.58333	2	0	>tr|B5MD38|B5MD38_HUMAN Trifunctional enzyme subunit beta, mitochondrial OS=Homo sapiens GN=HADHB PE=1 SV=1	HADHB
2.09217	0	1.09686	0	1.80735	0.305808	0.00751661	0.677776	3	1	1.56353	7.66667	1	0	>sp|O94925|GLSK_HUMAN Glutaminase kidney isoform, mitochondrial OS=Homo sapiens GN=GLS PE=1 SV=1	GLS
3.65623	1.66297	3.05649	0	3.20945	3.55885	0.207712	0.677776	3	2	1.56679	40.5833	2	0	>sp|P62333|PRS10_HUMAN 26S protease regulatory subunit 10B OS=Homo sapiens GN=PSMC6 PE=1 SV=1	PSMC6
2.09217	0	2.09217	0	1.80735	1.2647	0.0218425	0.677776	3	1	1.57566	10.6667	3	0	>tr|C9JIJ5|C9JIJ5_HUMAN 60S ribosomal protein L7 (Fragment) OS=Homo sapiens GN=RPL7 PE=1 SV=1	RPL7
3.7973	2.0199	3.40939	3.17159	2.75192	0	0.178778	0.677776	3	2	1.58904	39	1	0	>sp|P42345|MTOR_HUMAN Serine/threonine-protein kinase mTOR OS=Homo sapiens GN=MTOR PE=1 SV=1	MTOR
2.09217	0	3.70506	3.558	2.58162	0	0.277176	0.677776	3	1	1.60695	29.9167	1	0	>sp|Q9Y678|COPG1_HUMAN Coatomer subunit gamma-1 OS=Homo sapiens GN=COPG1 PE=1 SV=1	COPG1
1.34577	0	2.5883	0.399931	1.32193	0	0.0210606	0.677776	3	1	1.61869	8.75	1	0	>sp|Q6KCM7|SCMC2_HUMAN Calcium-binding mitochondrial carrier protein SCaMC-2 OS=Homo sapiens GN=SLC25A25 PE=1 SV=1	SLC25A25
1.81307	0	2.38082	2.078	2.75192	0	0.09481	0.677776	3	1	1.6226	16.25	1	0	>sp|P07237|PDIA1_HUMAN Protein disulfide-isomerase OS=Homo sapiens GN=P4HB PE=1 SV=3	P4HB
2.70889	0	0.795859	0	2.92019	1.55459	0.129251	0.677776	3	1	1.62345	15.4583	3	0	>tr|A0A087WZZ9|A0A087WZZ9_HUMAN Cyclin-dependent kinase 1 OS=Homo sapiens GN=CDK1 PE=1 SV=1	CDK1
0.760812	0	2.8216	1.44846	2.75192	0	0.121382	0.677776	3	1	1.62862	14.6667	2	0	>tr|E9PRQ7|E9PRQ7_HUMAN UBX domain-containing protein 1 OS=Homo sapiens GN=UBXN1 PE=1 SV=1	UBXN1
1.0199	0	2.09217	0	1.80735	0	0.00691666	0.677776	3	0	1.63981	7	1	0	>sp|Q9BTY7|HGH1_HUMAN Protein HGH1 homolog OS=Homo sapiens GN=HGH1 PE=1 SV=1	HGH1
2.25214	2.02729	2.74595	0	2.92019	0.906891	0.0551275	0.677776	3	2	1.66137	19.9167	2	0	>tr|H3BSJ9|H3BSJ9_HUMAN Cytochrome b-c1 complex subunit 2, mitochondrial OS=Homo sapiens GN=UQCRC2 PE=1 SV=1	UQCRC2
2.03953	0.874469	2.74595	0.949016	2.08746	0	0.0114778	0.677776	3	2	1.68315	13.5	2	0	>sp|P11310|ACADM_HUMAN Medium-chain specific acyl-CoA dehydrogenase, mitochondrial OS=Homo sapiens GN=ACADM PE=1 SV=1	ACADM
2.03953	0	2.25214	1.0199	1.80735	0	0.00959932	0.677776	3	1	1.69304	10.0833	1	0	>sp|Q53EL6|PDCD4_HUMAN Programmed cell death protein 4 OS=Homo sapiens GN=PDCD4 PE=1 SV=2	PDCD4
2.49541	0	1.33787	1.57154	2.92019	0	0.0706166	0.677776	3	1	1.72731	15.3333	3	0	>tr|E9PRC8|E9PRC8_HUMAN T-complex protein 1 subunit gamma (Fragment) OS=Homo sapiens GN=CCT3 PE=1 SV=1	CCT3
4.24106	2.33191	3.62287	3.33886	3.0025	0	0.174883	0.677776	3	2	1.73188	47.8333	1	0	>sp|P55060|XPO2_HUMAN Exportin-2 OS=Homo sapiens GN=CSE1L PE=1 SV=3	CSE1L
2.57827	0	3.11316	1.04924	2.81876	2.13386	0.0490233	0.677776	3	2	1.7757	23.25	2	0	>tr|F8W0G4|F8W0G4_HUMAN Poly(rC)-binding protein 2 (Fragment) OS=Homo sapiens GN=PCBP2 PE=1 SV=1	PCBP2
2.49541	0	2.09217	0	0.795859	0	0.0248948	0.677776	3	0	1.79448	8.66667	1	0	>sp|Q16543|CDC37_HUMAN Hsp90 co-chaperone Cdc37 OS=Homo sapiens GN=CDC37 PE=1 SV=1	CDC37
3.35069	0	3.01557	2.70582	3.31389	1.55459	0.0844584	0.677776	3	2	1.80658	33.3333	1	0	>sp|Q92900|RENT1_HUMAN Regulator of nonsense transcripts 1 OS=Homo sapiens GN=UPF1 PE=1 SV=2	UPF1
1.76671	0	1.33787	0	2.58162	0	0.00653271	0.677776	3	0	1.8954	8.91667	1	0	>sp|Q9UKN8|TF3C4_HUMAN General transcription factor 3C polypeptide 4 OS=Homo sapiens GN=GTF3C4 PE=1 SV=2	GTF3C4
2.32193	0	3.74745	0	3.38418	3.66613	0.21047	0.677776	3	1	1.92914	36.8333	1	0	>sp|Q15365|PCBP1_HUMAN Poly(rC)-binding protein 1 OS=Homo sapiens GN=PCBP1 PE=1 SV=2	PCBP1
1.70352	0	1.4075	0	2.99498	0	0.0139618	0.677776	3	0	2.03533	11.125	1	0	>sp|P42167|LAP2B_HUMAN Lamina-associated polypeptide 2, isoforms beta/gamma OS=Homo sapiens GN=TMPO PE=1 SV=2	TMPO
2.32593	2.56139	3.09979	0	3.37117	0	0.0842699	0.677776	3	1	2.0785	25.8333	1	0	>sp|P33993|MCM7_HUMAN DNA replication licensing factor MCM7 OS=Homo sapiens GN=MCM7 PE=1 SV=4	MCM7
2.36923	0	2.8216	2.24793	3.31389	0	0.0590812	0.677776	3	1	2.0856	23.5833	1	0	>sp|Q15084|PDIA6_HUMAN Protein disulfide-isomerase A6 OS=Homo sapiens GN=PDIA6 PE=1 SV=1	PDIA6
2.74745	0	3.88671	3.17159	3.07682	0	0.121045	0.677776	3	1	2.17979	33.3333	2	0	>sp|Q969G3|SMCE1_HUMAN SWI/SNF-related matrix-associated actin-dependent regulator of chromatin subfamily E member 1 OS=Homo sapiens GN=SMARCE1 PE=1 SV=2	SMARCE1
2.20511	0	2.38082	0	2.37697	0	2.32016e-06	0.0138249	3	0	2.32097	12.25	1	0	>sp|P52701|MSH6_HUMAN DNA mismatch repair protein Msh6 OS=Homo sapiens GN=MSH6 PE=1 SV=2	MSH6
0.169925	0	2.58162	0	4.36923	0	0.122836	0.677776	3	0	2.37359	26.5	1	0	>sp|P46821|MAP1B_HUMAN Microtubule-associated protein 1B OS=Homo sapiens GN=MAP1B PE=1 SV=2	MAP1B
3.05649	3.13614	4.19092	0	3.01495	0	0.0999698	0.677776	3	1	2.37541	38.125	1	0	>sp|P25205|MCM3_HUMAN DNA replication licensing factor MCM3 OS=Homo sapiens GN=MCM3 PE=1 SV=3	MCM3
2.5883	0	2.38082	0	2.37697	0	3.94208e-06	0.0138249	3	0	2.4487	13.75	2	0	>sp|Q13098|CSN1_HUMAN COP9 signalosome complex subunit 1 OS=Homo sapiens GN=GPS1 PE=1 SV=4	GPS1
1.77259	0	2.34676	0	3.28129	0	0.00495656	0.677776	3	0	2.46688	15.5833	2	0	>sp|Q92945|FUBP2_HUMAN Far upstream element-binding protein 2 OS=Homo sapiens GN=KHSRP PE=1 SV=4	KHSRP
2.03953	0	3.21917	0	2.75192	0	0.00146792	0.643502	3	0	2.6702	16.8333	2	0	>tr|F5H6T1|F5H6T1_HUMAN ARP2 actin-related protein 2 homolog (Yeast), isoform CRA_d OS=Homo sapiens GN=ACTR2 PE=1 SV=2	ACTR2
2.5883	0	2.38082	0	3.28129	0	0.000540409	0.398267	3	0	2.75014	18.75	1	0	>sp|P06733|ENOA_HUMAN Alpha-enolase OS=Homo sapiens GN=ENO1 PE=1 SV=2	ENO1
6.26548	5.67085	5.49896	0	3.35609	0	0.2047	0.677776	3	1	3.14989	216.5	1	0	>sp|P35908|K22E_HUMAN Keratin, type II cytoskeletal 2 epidermal OS=Homo sapiens GN=KRT2 PE=1 SV=2	KRT2
6.02191	4.49452	7.02322	0	6.44478	0	0.0306307	0.677776	3	1	4.99846	298.042	2	0	>tr|Q5ST81|Q5ST81_HUMAN Tubulin beta chain OS=Homo sapiens GN=TUBB PE=1 SV=1	TUBB

## Sheet: Ub signatures (GG and LRGG)
G..MantleCellLymphoma.raw..R4_Z138_GST_1.MSMS_P_1PepInfo.txt	G..MantleCellLymphoma.raw..R4_Z138_GST_10.MSMS_P_1PepInfo.txt	G..MantleCellLymphoma.raw..R4_Z138_GST_2.MSMS_P_1PepInfo.txt	G..MantleCellLymphoma.raw..R4_Z138_GST_3.MSMS_P_1PepInfo.txt	G..MantleCellLymphoma.raw..R4_Z138_GST_4.MSMS_P_1PepInfo.txt	G..MantleCellLymphoma.raw..R4_Z138_GST_5.MSMS_P_1PepInfo.txt	G..MantleCellLymphoma.raw..R4_Z138_GST_6.MSMS_P_1PepInfo.txt	G..MantleCellLymphoma.raw..R4_Z138_GST_7.MSMS_P_1PepInfo.txt	G..MantleCellLymphoma.raw..R4_Z138_GST_8.MSMS_P_1PepInfo.txt	G..MantleCellLymphoma.raw..R4_Z138_GST_9.MSMS_P_1PepInfo.txt	G..MantleCellLymphoma.raw..R4_Z138_TUBE_1.MSMS_P_1PepInfo.txt	G..MantleCellLymphoma.raw..R4_Z138_TUBE_10.MSMS_P_1PepInfo.txt	G..MantleCellLymphoma.raw..R4_Z138_TUBE_2.MSMS_P_1PepInfo.txt	G..MantleCellLymphoma.raw..R4_Z138_TUBE_3.MSMS_P_1PepInfo.txt	G..MantleCellLymphoma.raw..R4_Z138_TUBE_4.MSMS_P_1PepInfo.txt	G..MantleCellLymphoma.raw..R4_Z138_TUBE_5.MSMS_P_1PepInfo.txt	G..MantleCellLymphoma.raw..R4_Z138_TUBE_6.MSMS_P_1PepInfo.txt	G..MantleCellLymphoma.raw..R4_Z138_TUBE_7.MSMS_P_1PepInfo.txt	G..MantleCellLymphoma.raw..R4_Z138_TUBE_8.MSMS_P_1PepInfo.txt	G..MantleCellLymphoma.raw..R4_Z138_TUBE_9.MSMS_P_1PepInfo.txt	G..MantleCellLymphoma.raw..R4_ZBR_GST_1.MSMS_P_1PepInfo.txt	G..MantleCellLymphoma.raw..R4_ZBR_GST_10.MSMS_P_1PepInfo.txt	G..MantleCellLymphoma.raw..R4_ZBR_GST_2.MSMS_P_1PepInfo.txt	G..MantleCellLymphoma.raw..R4_ZBR_GST_3.MSMS_P_1PepInfo.txt	G..MantleCellLymphoma.raw..R4_ZBR_GST_4.MSMS_P_1PepInfo.txt	G..MantleCellLymphoma.raw..R4_ZBR_GST_5.MSMS_P_1PepInfo.txt	G..MantleCellLymphoma.raw..R4_ZBR_GST_6.MSMS_P_1PepInfo.txt	G..MantleCellLymphoma.raw..R4_ZBR_GST_7.MSMS_P_1PepInfo.txt	G..MantleCellLymphoma.raw..R4_ZBR_GST_8.MSMS_P_1PepInfo.txt	G..MantleCellLymphoma.raw..R4_ZBR_GST_9.MSMS_P_1PepInfo.txt	G..MantleCellLymphoma.raw..R4_ZBR_TUBE_1.MSMS_P_1PepInfo.txt	G..MantleCellLymphoma.raw..R4_ZBR_TUBE_10.MSMS_P_1PepInfo.txt	G..MantleCellLymphoma.raw..R4_ZBR_TUBE_2.MSMS_P_1PepInfo.txt	G..MantleCellLymphoma.raw..R4_ZBR_TUBE_3.MSMS_P_1PepInfo.txt	G..MantleCellLymphoma.raw..R4_ZBR_TUBE_4.MSMS_P_1PepInfo.txt	G..MantleCellLymphoma.raw..R4_ZBR_TUBE_5.MSMS_P_1PepInfo.txt	G..MantleCellLymphoma.raw..R4_ZBR_TUBE_6.MSMS_P_1PepInfo.txt	G..MantleCellLymphoma.raw..R4_ZBR_TUBE_7.MSMS_P_1PepInfo.txt	G..MantleCellLymphoma.raw..R4_ZBR_TUBE_8.MSMS_P_1PepInfo.txt	G..MantleCellLymphoma.raw..R4_ZBR_TUBE_9.MSMS_P_1PepInfo.txt	G..MantleCellLymphoma.raw..R5_Z138_GST_1.MSMS_P_1PepInfo.txt	G..MantleCellLymphoma.raw..R5_Z138_GST_10.MSMS_P_1PepInfo.txt	G..MantleCellLymphoma.raw..R5_Z138_GST_2.MSMS_P_1PepInfo.txt	G..MantleCellLymphoma.raw..R5_Z138_GST_3.MSMS_P_1PepInfo.txt	G..MantleCellLymphoma.raw..R5_Z138_GST_4.MSMS_P_1PepInfo.txt	G..MantleCellLymphoma.raw..R5_Z138_GST_5.MSMS_P_1PepInfo.txt	G..MantleCellLymphoma.raw..R5_Z138_GST_6.MSMS_P_1PepInfo.txt	G..MantleCellLymphoma.raw..R5_Z138_GST_7.MSMS_P_1PepInfo.txt	G..MantleCellLymphoma.raw..R5_Z138_GST_8.MSMS_P_1PepInfo.txt	G..MantleCellLymphoma.raw..R5_Z138_GST_9.MSMS_P_1PepInfo.txt
0	0	0	0	0	23	0	0	0	0	851	23	368	92	69	46	23	23	46	23	23	0	0	0	0	0	0	23	0	0	345	0	207	23	23	0	0	0	0	0	0	0	0	0	23	0	0	0	0	0
0	0	0	0	0	0	0	0	0	0	66	0	22	0	22	22	22	22	0	0	0	0	0	0	0	0	0	0	0	0	22	0	22	22	0	22	0	22	0	22	22	0	0	0	0	0	0	0	0	0
0	0	0	0	0	0	0	0	0	0	100	0	20	20	20	0	0	0	0	0	0	0	0	0	0	0	0	0	0	0	20	0	20	0	20	0	0	0	0	0	0	0	0	0	0	0	0	0	0	0
0	0	0	0	0	0	0	0	0	0	0	0	0	0	0	0	0	0	0	0	0	0	0	0	0	0	0	0	0	0	0	0	0	0	0	0	0	0	0	0	0	0	0	0	0	0	0	0	0	0
0	0	0	0	0	0	0	0	0	0	0	0	0	0	0	0	0	0	0	0	0	0	0	0	0	0	0	0	0	0	0	0	0	0	0	0	0	0	0	0	0	0	0	0	0	0	0	0	0	0
0	0	0	0	0	0	0	0	0	0	0	0	0	0	0	0	0	0	0	0	0	0	0	0	0	0	0	0	0	0	0	0	0	0	0	0	0	0	0	0	0	0	0	0	0	0	0	0	0	0
0	0	0	0	0	0	0	0	0	0	0	0	22	22	0	0	0	0	0	0	0	0	0	0	0	0	0	0	0	0	0	0	0	0	22	0	0	0	0	0	0	0	0	0	0	0	0	0	0	0
0	0	0	0	0	0	0	0	0	0	0	0	0	0	0	0	0	0	0	0	0	0	0	0	0	0	0	0	0	0	0	0	0	0	0	0	0	0	0	0	0	0	0	0	0	0	0	0	0	0
0	0	0	0	0	0	0	0	0	0	0	0	0	0	0	0	0	0	0	0	0	0	0	0	0	0	0	0	0	0	0	0	0	0	0	0	0	0	0	0	0	0	0	0	0	0	0	0	0	0
0	0	0	0	0	0	0	0	0	0	0	0	0	0	0	0	0	0	0	0	0	0	0	0	0	0	0	0	0	0	0	0	0	0	0	0	0	0	0	0	0	0	0	0	0	0	0	0	0	0
0	0	0	0	0	0	0	0	0	0	0	0	0	0	0	0	0	0	0	0	0	0	0	0	0	0	0	0	0	0	0	0	0	0	0	0	0	0	0	0	0	0	0	0	0	0	0	0	0	0
0	0	0	0	0	0	0	0	0	0	0	0	0	0	0	0	0	0	0	0	0	0	0	0	0	0	0	0	0	0	0	0	0	0	0	0	0	0	0	0	0	0	0	0	3	0	0	0	0	0
0	0	0	0	0	0	0	0	0	0	0	0	0	0	0	0	0	0	0	3	0	0	0	0	0	0	0	0	0	0	0	0	0	0	0	0	0	0	0	0	0	0	0	0	0	0	0	0	0	0
0	0	0	0	0	0	0	0	0	0	0	0	0	0	0	0	0	0	0	0	0	0	0	0	0	0	0	0	0	0	0	0	0	0	0	0	0	0	0	0	0	0	0	0	0	0	0	0	0	0
0	0	0	0	0	0	0	0	0	0	0	0	0	0	0	0	0	0	0	0	0	0	0	0	0	0	0	0	0	0	0	0	0	0	0	0	0	0	0	0	0	0	0	0	0	0	0	0	0	0
0	0	0	0	0	0	0	0	0	0	0	0	0	0	0	0	0	0	0	0	0	0	0	0	0	0	0	0	0	0	0	0	0	0	0	0	0	0	0	0	0	0	0	0	0	0	0	0	0	4
0	0	0	0	0	0	0	0	0	0	0	0	0	0	0	0	0	0	0	0	0	0	0	0	0	0	0	0	0	0	0	0	0	0	0	0	0	0	0	0	0	0	0	0	0	0	0	0	0	0
0	0	0	0	0	0	0	0	0	0	0	0	0	0	0	0	0	0	2	0	0	0	0	0	0	0	0	0	0	0	0	0	0	0	0	0	0	0	0	0	0	0	0	0	0	0	0	0	0	0
0	0	0	0	0	0	0	0	0	0	0	0	0	0	0	0	0	0	0	0	0	0	0	0	0	0	0	0	0	0	0	0	0	0	0	0	0	0	0	0	0	0	0	0	0	0	0	0	0	0
0	0	0	0	0	0	0	0	0	0	0	0	0	0	0	0	0	0	0	0	0	0	0	0	0	0	0	0	0	0	0	0	0	0	0	0	0	0	0	0	0	0	0	0	0	0	0	0	0	0
0	0	0	0	0	0	0	0	0	0	0	0	0	0	0	0	0	0	0	0	0	0	0	0	0	0	0	0	0	0	0	0	0	0	0	0	0	0	0	0	0	0	0	0	0	0	0	0	0	3
0	0	0	0	0	0	0	0	0	0	0	0	0	0	0	0	0	0	0	0	0	0	0	0	0	0	0	0	0	0	0	0	0	0	0	0	0	0	0	0	0	0	0	0	0	0	0	0	0	0
0	0	0	0	0	0	0	0	0	0	0	0	0	0	0	1	0	0	0	0	0	0	0	0	0	0	0	0	0	0	0	0	0	0	0	0	0	0	0	0	0	0	0	0	0	1	0	0	0	0
0	0	0	0	0	0	0	0	0	0	0	0	0	0	0	0	0	0	0	0	0	0	0	0	0	0	0	0	0	0	0	0	0	0	0	0	0	0	0	0	0	0	0	0	0	0	0	0	0	0
0	0	0	0	0	0	0	0	0	0	0	0	0	0	0	0	0	0	0	1	0	0	0	0	0	0	0	0	0	0	0	0	0	0	0	0	0	0	0	0	0	0	0	0	0	0	0	0	0	0
0	0	0	0	0	0	0	0	0	0	0	0	0	0	0	0	0	0	1	0	0	0	0	0	0	0	0	0	0	0	0	0	0	0	0	0	0	0	0	0	0	0	0	0	0	0	0	0	0	0
0	0	0	0	0	0	0	0	0	0	0	0	0	0	0	0	0	0	0	0	0	0	0	0	0	0	0	0	0	0	0	0	0	0	0	0	0	0	0	0	0	0	0	0	0	0	0	0	0	0
0	1	0	0	0	0	0	0	0	0	0	0	0	0	0	0	0	0	0	0	0	0	0	0	0	0	0	0	0	0	0	0	0	0	0	0	0	0	0	0	0	0	0	0	0	0	0	0	0	0
0	0	0	0	0	0	0	0	0	0	0	0	0	0	0	0	0	0	0	0	0	0	0	0	0	0	0	0	0	0	0	0	0	0	0	0	0	0	0	0	0	0	0	0	0	0	0	0	0	0
0	0	0	0	0	0	0	0	0	0	0	0	0	0	0	0	0	0	0	0	0	0	0	0	0	0	0	0	0	0	0	0	0	0	0	0	0	0	0	0	0	0	0	0	0	0	0	0	0	0
0	0	0	0	0	0	0	0	0	0	0	0	0	0	0	0	0	0	0	0	0	0	0	0	0	0	0	0	0	0	0	0	0	0	0	0	0	0	0	0	0	0	0	0	0	0	0	0	0	0
0	0	0	0	0	0	0	0	0	0	0	0	0	0	0	0	0	0	0	0	0	0	0	0	0	0	0	0	0	0	0	0	0	0	0	0	0	0	0	0	0	0	0	0	0	0	0	0	0	0
0	0	0	0	0	1	0	0	0	0	0	0	0	0	0	0	0	0	0	0	0	0	0	0	0	0	0	0	0	0	0	0	0	0	0	0	0	0	0	0	0	0	0	0	0	0	0	0	0	0
0	0	0	0	0	0	0	0	0	0	0	0	0	0	0	0	0	0	0	0	0	0	0	0	0	0	0	0	0	0	0	0	0	0	0	0	0	0	0	0	0	0	0	0	0	0	0	0	0	0
0	0	0	0	0	0	0	0	0	0	0	0	0	0	0	0	0	0	0	0	0	0	0	0	0	0	0	0	0	0	0	0	0	0	0	0	0	0	0	0	0	0	0	0	0	0	0	0	0	0
0	0	0	0	10	0	0	0	0	5	5	0	0	24	0	5	0	9	24	20	5	0	5	5	0	5	0	0	5	3	0	0	0	0	9	0	0	12	5	10	20	10	10	25	35	5	10	4	20	20
0	0	0	0	8	16	24	0	0	0	0	0	0	0	0	24	16	0	0	0	32	0	8	8	0	8	16	24	8	0	0	0	8	0	0	0	0	8	0	0	0	0	0	24	16	0	8	0	16	0
0	8	0	8	0	8	24	0	0	0	8	0	8	8	8	8	8	8	0	8	8	0	0	0	0	16	8	8	8	0	0	0	8	0	0	8	0	16	0	0	8	0	0	0	0	0	0	0	0	0
0	0	0	0	0	0	11	0	0	0	0	0	0	0	0	0	11	0	0	0	0	0	0	0	0	0	11	11	0	0	0	0	0	0	0	0	0	0	0	0	0	0	0	0	0	0	11	0	0	0
0	0	0	0	0	0	0	0	0	0	0	0	0	0	0	0	0	0	0	0	0	0	0	0	0	0	0	0	0	0	0	0	0	0	0	0	0	0	0	0	0	0	0	0	0	0	12	0	0	0
0	0	0	0	0	0	0	0	0	0	0	0	0	0	0	0	0	0	0	0	0	0	0	0	0	0	0	0	0	0	0	0	0	0	0	0	0	0	0	0	0	0	0	0	0	0	0	0	0	0
0	0	0	0	0	0	0	0	0	0	0	0	0	0	0	0	0	0	0	0	0	0	0	0	0	0	0	0	0	0	0	0	0	0	0	0	0	0	0	0	0	0	0	0	0	0	0	0	0	0
0	0	0	0	0	0	0	0	0	0	0	0	0	0	0	0	0	0	0	0	0	0	0	0	0	0	0	0	0	0	0	0	0	0	0	0	0	0	0	0	0	0	0	0	0	0	0	0	0	0
0	0	0	0	0	0	0	0	0	0	0	0	0	0	0	0	0	0	0	0	0	0	0	0	0	0	0	0	0	0	0	0	0	0	0	0	0	0	0	0	0	0	0	0	0	0	16	0	0	0
0	1	1	0	2	0	0	0	0	0	0	0	0	0	0	0	0	2	0	0	0	2	0	0	0	0	0	0	2	0	1	0	0	0	0	0	0	0	0	1	0	0	0	0	0	0	0	0	0	0
0	0	0	0	0	0	0	0	0	0	0	0	0	3	0	0	0	0	0	0	0	0	0	0	0	0	0	0	0	0	0	0	0	0	0	0	0	0	0	0	0	0	0	0	0	0	0	0	0	0
0	0	0	0	0	0	0	0	0	0	0	0	0	0	0	0	0	0	0	0	0	0	0	0	0	0	0	0	0	7	0	0	0	0	0	0	0	0	0	4	0	0	0	0	0	0	0	0	0	0
0	0	0	0	0	0	0	0	0	0	0	0	0	0	0	0	0	0	0	0	0	0	0	0	0	0	0	0	0	0	0	0	0	0	0	0	0	0	0	0	0	1	0	0	0	0	0	1	0	0
0	0	0	0	0	0	0	0	0	0	0	0	0	0	0	0	0	0	0	6	0	0	0	0	0	0	0	0	0	0	0	0	0	0	0	0	0	0	0	0	0	0	0	0	0	0	0	0	0	0
0	6	0	0	0	0	0	0	0	0	0	0	0	0	0	0	0	0	0	0	0	0	0	0	0	0	0	0	0	0	0	0	0	0	0	0	0	0	0	0	0	0	0	0	0	0	0	0	0	0
0	0	0	0	0	0	0	0	0	0	0	0	0	0	0	0	0	0	0	0	0	0	0	0	0	0	0	0	0	0	0	0	0	0	0	0	0	0	0	0	0	0	0	0	0	0	0	0	0	0
0	0	0	0	0	0	0	0	0	0	0	0	0	0	0	0	0	0	0	0	0	0	0	0	0	0	0	0	0	0	0	0	0	0	0	0	0	0	0	0	0	0	0	0	0	0	0	0	0	0
0	0	0	0	0	0	0	0	0	0	0	0	0	0	0	0	0	0	0	0	0	0	0	0	0	0	0	0	0	0	0	0	0	0	0	0	0	0	0	0	0	0	0	0	0	0	0	0	0	0
0	0	0	0	0	0	0	0	0	0	0	0	0	0	0	0	0	5	0	0	0	0	0	0	0	0	0	0	0	0	0	0	0	0	0	0	0	0	0	0	0	0	0	0	0	0	0	0	0	0
0	0	0	0	0	0	0	0	0	0	0	0	0	0	0	3	0	0	0	2	0	0	0	0	0	0	0	0	0	0	0	0	0	0	0	0	0	0	0	0	0	0	0	0	0	0	0	0	0	0
0	0	0	0	0	0	0	0	0	0	0	0	0	0	0	0	0	0	0	0	0	0	0	0	0	0	0	0	0	0	0	0	0	0	0	0	0	0	0	0	0	0	0	0	0	0	0	0	0	0
0	0	0	0	0	0	0	0	0	0	0	0	0	0	0	0	0	0	0	0	0	0	0	0	0	0	0	0	0	0	0	0	0	0	0	0	0	0	0	0	0	0	0	0	0	0	0	0	0	0
0	0	0	0	0	0	0	0	0	0	0	0	0	0	0	0	0	0	0	0	0	0	0	0	0	0	0	0	0	0	0	0	0	0	0	0	0	0	0	0	0	0	0	0	0	0	0	0	0	0
0	0	0	0	0	0	0	0	0	0	0	0	0	0	0	0	0	0	0	0	0	0	0	0	0	0	0	0	0	0	0	0	0	0	0	0	0	0	0	0	0	0	0	0	0	0	0	0	0	0
0	0	0	0	0	0	0	0	0	0	0	0	0	0	0	0	0	0	0	0	0	0	0	0	0	0	0	0	0	0	0	0	0	0	0	0	0	3	0	0	0	0	0	0	0	0	0	0	0	0
0	0	0	0	0	0	0	0	0	0	0	0	0	0	0	0	0	0	0	0	0	0	0	0	0	0	0	0	0	0	0	0	0	0	0	0	0	0	0	0	0	0	0	0	0	0	0	0	0	0
0	0	0	0	0	0	0	0	0	0	0	0	0	0	0	0	0	0	0	0	0	0	0	0	0	0	0	0	0	0	0	0	0	0	0	0	0	0	0	0	0	0	0	0	0	0	0	0	0	0
0	0	0	0	0	0	0	0	0	0	0	0	0	0	1	0	0	0	0	0	0	0	0	0	0	0	0	0	0	0	0	0	0	0	1	0	0	0	0	0	0	0	0	0	0	0	0	0	0	0
0	0	0	0	0	0	0	0	0	0	0	0	0	0	0	0	0	0	0	0	0	0	0	0	0	0	0	0	0	0	0	0	0	0	0	0	0	0	0	0	0	0	0	0	0	0	0	0	0	0
0	0	0	0	0	0	0	0	0	0	0	0	0	0	0	0	0	2	0	0	0	0	0	0	0	0	0	0	0	0	0	0	0	0	0	0	0	0	0	0	0	0	0	0	0	0	0	0	0	0
0	0	0	0	0	0	0	0	0	0	0	2	0	0	0	0	0	0	0	0	0	0	0	0	0	0	0	0	0	0	0	0	0	0	0	0	0	0	0	0	0	0	0	0	0	0	0	0	0	0
0	0	0	0	0	0	0	0	0	0	0	0	0	0	0	0	0	0	0	0	0	0	0	0	0	0	0	0	0	0	0	0	0	0	0	0	0	0	0	0	0	0	0	0	0	0	0	0	2	0
0	0	0	0	0	0	0	0	0	0	0	0	0	0	0	0	0	0	0	0	0	0	0	0	0	0	0	0	2	0	0	0	0	0	0	0	0	0	0	0	0	0	0	0	0	0	0	0	0	0
0	0	0	0	0	0	0	0	0	0	0	0	2	0	0	0	0	0	0	0	0	0	0	0	0	0	0	0	0	0	0	0	0	0	0	0	0	0	0	0	0	0	0	0	0	0	0	0	0	0
0	0	0	0	0	0	0	0	0	0	0	0	0	0	0	0	0	0	0	0	0	0	0	0	0	0	0	0	0	0	0	0	0	0	0	0	0	0	0	0	0	0	0	0	0	0	0	0	0	0
0	0	0	0	0	0	0	0	0	0	0	0	0	0	0	0	0	0	2	0	0	0	0	0	0	0	0	0	0	0	0	0	0	0	0	0	0	0	0	0	0	0	0	0	0	0	0	0	0	0
0	0	0	0	0	0	0	0	0	0	0	0	0	0	0	0	0	0	0	0	0	0	0	0	0	0	0	0	0	0	0	0	0	0	0	0	0	0	0	0	0	0	0	0	0	0	0	0	0	0
0	0	0	0	0	0	0	0	0	0	0	0	0	0	0	0	0	0	0	0	0	0	0	0	0	0	0	0	0	0	0	0	0	0	0	0	0	0	0	0	0	0	0	0	0	0	0	0	0	0
0	0	0	0	0	0	0	0	0	0	0	0	0	0	0	0	2	0	0	0	0	0	0	0	0	0	0	0	0	0	0	0	0	0	0	0	0	0	0	0	0	0	0	0	0	0	0	0	0	0
0	0	0	0	0	0	0	0	0	0	0	0	0	0	0	0	0	2	0	0	0	0	0	0	0	0	0	0	0	0	0	0	0	0	0	0	0	0	0	0	0	0	0	0	0	0	0	0	0	0
0	0	0	0	0	0	0	0	0	0	0	0	0	0	0	0	0	0	0	0	0	0	0	0	0	0	0	0	0	0	0	0	0	0	0	0	0	0	0	0	0	0	0	0	0	0	0	0	0	0
0	0	0	0	0	0	0	0	0	0	0	0	0	0	0	0	0	0	0	0	0	0	0	0	0	0	0	0	0	0	0	0	0	0	0	0	0	0	0	0	0	0	0	0	0	0	0	0	0	0
0	0	0	0	0	0	0	0	0	0	0	0	0	0	0	0	0	0	0	0	0	0	0	0	0	0	0	0	0	1	0	0	0	0	0	0	0	0	0	0	0	0	0	0	0	0	0	0	0	0
0	0	0	0	0	0	0	0	0	0	0	0	0	0	0	0	0	0	0	0	0	0	0	0	0	0	0	0	0	0	0	0	1	0	0	0	0	0	0	0	0	0	0	0	0	0	0	0	0	0
0	0	0	0	0	0	0	0	0	0	0	0	0	0	0	0	0	0	0	0	0	0	0	0	0	0	0	0	0	0	0	0	1	0	0	0	0	0	0	0	0	0	0	0	0	0	0	0	0	0
0	0	0	0	0	0	0	0	0	0	0	0	0	0	0	0	0	0	0	0	0	0	0	0	0	0	0	0	0	0	0	0	0	0	0	0	0	0	0	0	0	0	0	0	0	0	0	0	0	0
0	0	0	0	0	0	0	0	0	0	0	0	0	0	0	0	0	0	0	0	0	0	0	0	1	0	0	0	0	0	0	0	0	0	0	0	0	0	0	0	0	0	0	0	0	0	0	0	0	0
0	0	0	0	0	0	0	0	0	0	0	0	0	0	0	0	0	0	0	0	0	0	0	0	0	0	0	0	0	0	0	0	0	0	0	0	0	0	0	0	0	0	0	0	0	0	0	0	0	0
0	0	0	0	0	0	0	0	0	0	0	0	0	0	0	0	0	0	0	0	0	0	0	0	0	0	0	0	0	0	0	0	0	0	0	0	0	0	0	0	0	0	0	0	0	0	0	0	0	0
0	0	0	0	0	0	0	0	0	0	0	0	0	0	0	0	0	0	0	0	0	0	0	0	0	0	0	0	0	0	0	0	0	0	0	0	0	0	0	0	0	0	0	0	0	0	0	0	0	0
0	0	0	0	0	0	0	0	0	0	0	0	0	0	0	0	0	0	0	0	0	0	0	0	0	0	0	0	0	0	0	0	0	0	0	0	0	0	0	0	0	0	0	0	0	0	0	0	0	0
0	0	0	0	0	0	0	0	0	0	0	0	0	0	0	0	0	0	0	0	0	0	0	0	0	0	0	0	0	0	0	0	0	0	0	0	0	0	0	0	0	0	0	0	0	0	0	0	0	0
0	0	0	0	0	0	0	0	0	0	0	0	0	0	0	0	0	0	0	0	0	0	0	0	0	0	0	0	0	0	0	0	0	0	0	1	0	0	0	0	0	0	0	0	0	0	0	0	0	0
0	0	0	0	0	0	0	0	0	0	0	0	0	0	0	0	0	0	0	0	0	0	0	0	0	0	0	0	0	0	0	0	0	0	0	0	0	0	0	0	0	0	0	0	0	0	0	0	0	0
0	0	0	0	0	0	0	0	0	0	0	0	0	0	0	0	0	0	0	0	0	0	0	0	0	0	0	0	0	0	0	0	0	0	0	0	0	0	0	0	0	0	0	0	0	0	0	0	0	0
0	0	0	0	0	0	0	0	0	0	0	0	0	0	0	0	0	0	0	0	0	0	0	0	0	0	0	0	0	0	0	0	0	0	0	0	0	0	0	0	0	0	0	0	0	0	0	1	0	0
0	0	0	0	0	0	0	0	0	0	0	0	0	0	0	0	0	0	0	0	0	0	0	0	0	0	0	0	0	0	0	0	0	0	0	0	0	0	0	0	0	0	0	0	0	0	0	0	0	0
0	0	0	0	0	0	0	0	0	0	0	0	0	0	0	0	0	0	0	0	0	0	0	0	0	0	0	0	0	0	0	0	0	0	0	0	0	0	0	0	0	0	0	0	0	0	0	0	0	0
0	0	0	0	0	0	0	0	0	0	0	0	0	0	0	0	0	0	0	0	0	0	0	0	0	0	0	0	0	0	0	0	0	0	0	0	0	0	0	0	0	0	0	0	0	0	0	0	0	0
0	0	0	0	0	0	0	0	0	0	0	0	0	0	0	0	0	0	0	0	0	0	0	0	0	0	0	0	0	0	0	0	0	0	0	0	0	0	0	0	0	0	0	0	0	0	0	0	0	0
0	0	0	0	0	0	0	0	0	0	0	0	0	0	0	0	0	0	0	0	0	0	0	0	0	0	0	0	0	0	0	0	0	1	0	0	0	0	0	0	0	0	0	0	0	0	0	0	0	0
0	1	0	0	0	0	0	0	0	0	0	0	0	0	0	0	0	0	0	0	0	0	0	0	0	0	0	0	0	0	0	0	0	0	0	0	0	0	0	0	0	0	0	0	0	0	0	0	0	0
0	0	0	0	0	0	0	0	0	0	0	0	0	0	0	0	0	0	0	0	0	0	0	0	0	0	0	0	0	0	0	0	0	0	0	0	0	0	0	0	0	0	0	0	0	0	0	0	0	0
0	0	0	0	0	0	0	0	0	0	0	0	0	0	0	0	0	0	0	0	0	0	0	0	0	0	0	0	0	0	0	0	0	0	0	0	0	0	0	0	0	0	0	0	0	0	0	0	0	0
0	0	0	0	0	0	0	0	0	0	0	0	0	0	0	0	0	0	0	0	0	0	0	0	0	0	0	0	0	0	0	0	0	0	0	0	0	0	0	0	0	0	0	0	0	0	0	0	0	0
0	0	0	0	0	0	0	0	0	0	0	0	0	0	0	0	0	0	0	0	0	0	0	0	0	0	0	0	0	0	0	0	0	0	0	0	0	0	0	0	0	0	0	0	0	0	0	0	0	0
0	0	0	0	0	0	0	0	0	0	0	0	0	0	0	0	0	0	0	0	0	0	0	0	0	0	0	0	0	0	0	0	0	0	0	0	0	0	0	0	0	0	0	0	0	0	0	0	0	0
0	0	0	0	0	0	0	0	0	0	0	0	0	0	0	0	0	0	0	0	0	0	0	0	0	0	0	0	0	0	0	0	0	0	0	0	0	0	0	0	0	0	0	0	0	0	0	0	0	0
[truncated: 82 more columns]

## Sheet: Description
Q-value	FDR at the given score level
score	Score
C	N- and C-terminal residue for cleavage site
pos	Position in protein sequence
pro	Protein
RT	Retention time
Mass	Observed parent ion mass
seq	peptide sequence
mod	Modification
z	charge state
Count.sum	Sum of spectra assignments for given peptide
